# Supplementary material for: Acid ceramidase promotes senescent cell survival
Source: Aging (Albany NY). 2021 Jun 8;13(12):15750–69. doi: 10.18632/aging.203170 (PMC8266329; doi:10.18632/aging.203170)
Supplement: Supplementary Table 1 [file aging-13-203170-s002.xls]

## Sheet: heat-value
Supplementary Table 1. Proteomics analysis of proliferating and senescent cells (Replicative exhaustion and IR-induced).
Accession	SP	GeneSymbol	Short Name	Sort-ID	# PSMs	YWI38-1	YWI38-2	YWI38-3	ISWI38-1	ISWI38-2	ISWI38-3	SWI38-1	SWI38-2	SWI38-3	GeneSymbol	YWI38-1	YWI38-2	YWI38-3	ISWI38-1	ISWI38-2	ISWI38-3	SWI38-1	SWI38-2	SWI38-3	YWI38(Ave)	ISWI38(Ave)	SWI38(Ave)	Ratio(S/P)	TTEST(IS/Y)	log2Ratio(IS/Y)	log10TTEST(IS/Y)	Ratio(S/P)	TTEST(S/Y)	log2Ratio(S/Y)	log10TTEST(S/Y)	Ratio(S/IS)	TTEST(S/IS)	log2Ratio(S/IS)	log10TTEST(S/IS)	# AAs	MW [kDa]	calc. pI	Core pathway	Complex_component	Complex_order	Function	Length	Pathway(1138)	Intramembrane (151)
3334209	O14929	HAT1	Histone acetyltransferase type B catalytic subunit	6211	13	1.26789	1.35983	1.33465	0.854128	0.909525	0.855593	0.875369	0.903135	0.80544	HAT1	0.932389	1	0.981486	0.628115	0.668854	0.629192	0.643736	0.664154	0.59231	1.32079	0.873082	0.861315	0.661031	0.000169529	-0.597211	3.77076	0.652121	0.000326759	-0.616788	3.48577	0.986522	0.748865	-0.0195768	0.125597	419	49.4808	5.69385	Chromatin modification	Chromatin modification	1		419
308153457	O75164	KDM4A	Lysine-specific demethylase 4A	5537	1	1.44549	1.40934	1.42694	0.978718	0.855912	0.900647	0.741118	0.945848	0.856842	KDM4A	1	0.974988	0.987167	0.677082	0.592125	0.623073	0.51271	0.654343	0.592768	1.42726	0.911759	0.847936	0.638819	0.000160073	-0.646522	3.79568	0.594102	0.000651138	-0.751218	3.18633	0.930001	0.409093	-0.104697	0.388178	1064	120.585	5.84619	Chromatin modification	Chromatin modification	7		1064
1350579	P27694	RFA1	Replication protein A 70 kDa DNA-binding subunit	4736	14	1.13979	1.3198	1.47012	0.8905	0.874941	0.828437	0.754972	0.870807	0.791382	RFA1	0.775304	0.89775	1	0.605731	0.595148	0.563515	0.513543	0.592336	0.53831	1.30991	0.864626	0.80572	0.660067	0.0102077	-0.599316	1.99107	0.615097	0.00764615	-0.701114	2.11656	0.931871	0.204992	-0.101797	0.688264	616	68.0953	7.21045	DNA replication and Repair	DNA replication and Repair	28		616
1703052	P35249	RFC4	Replication factor C subunit 4	5212	3	1.27877	1.36899	1.44682	0.8966	0.91878	0.860299	0.869444	0.860067	0.882191	RFC4	0.883849	0.946209	1	0.619706	0.635036	0.594615	0.600936	0.594455	0.609746	1.36486	0.891893	0.870567	0.653469	0.000778412	-0.613808	3.10879	0.637845	0.000542355	-0.648723	3.26572	0.97609	0.306592	-0.0349145	0.513439	363	39.6569	8.01611	DNA replication and Repair	DNA replication and Repair	31		363
74745929	Q5TBB1	RNH2B	Ribonuclease H2 subunit B	6404	1	1.32255	1.40995	1.32955	0.915777	1.01758	0.720156	0.836258	0.825025	0.943198	RNH2B	0.938009	1	0.942974	0.649508	0.721709	0.510765	0.59311	0.585143	0.668957	1.35402	0.884503	0.86816	0.653243	0.00687609	-0.614308	2.16266	0.641173	0.000492227	-0.641213	3.30783	0.981524	0.871835	-0.0269052	0.0595658	312	35.1164	9.12939	DNA replication and Repair	DNA replication and Repair	37		312
728777	P40937	RFC5	Replication factor C subunit 5	2531	4	1.14722	1.36577	1.32093	0.781966	0.80987	0.782935	0.826956	0.820029	0.836242	RFC5	0.839978	1	0.967164	0.572545	0.592975	0.573254	0.605485	0.600413	0.612285	1.27797	0.791591	0.827742	0.619411	0.00194132	-0.691032	2.7119	0.647699	0.00252704	-0.626604	2.59739	1.04567	0.0245208	0.0644273	1.61047	340	38.4722	7.1958	DNA replication and Repair	DNA replication and Repair	33		340
56757608	P35251	RFC1	Replication factor C subunit 1	3556	4	1.52293	1.65604	1.50422	0.978524	0.9169	0.866031	0.750347	0.855466	0.820384	RFC1	0.919622	1	0.908321	0.590882	0.55367	0.522953	0.453097	0.516573	0.495389	1.56106	0.920485	0.808732	0.589653	0.000377307	-0.762063	3.42331	0.518065	0.00018923	-0.948794	3.72301	0.878594	0.0674073	-0.186731	1.17129	1148	128.175	9.36377	DNA replication and Repair	DNA replication and Repair	30		1148
2497824	Q14566	MCM6	DNA replication licensing factor MCM6	4194	25	1.39087	1.56541	1.49171	0.783905	0.803229	0.78591	0.765684	0.764823	0.687623	MCM6	0.888504	1	0.952924	0.500768	0.513112	0.502049	0.489128	0.488578	0.439262	1.48266	0.791015	0.739377	0.533509	0.000170568	-0.906414	3.7681	0.498682	0.000197179	-1.00381	3.70514	0.934719	0.124145	-0.097395	0.906071	821	92.8312	5.41455	DNA replication and Repair	DNA replication and Repair	26		821
20981696	P33993	MCM7	DNA replication licensing factor MCM7	4280	20	1.48954	1.5172	1.51428	0.818202	0.834071	0.753423	0.75865	0.757618	0.664425	MCM7	0.98177	1	0.998073	0.539284	0.549744	0.496588	0.500033	0.499353	0.437928	1.50701	0.801899	0.726897	0.532114	1.12994e-05	-0.910193	4.94694	0.482346	1.77501e-05	-1.05186	4.7508	0.90647	0.132616	-0.141668	0.877404	719	81.2566	6.45557	DNA replication and Repair	DNA replication and Repair	27		719
41019490	P49736	MCM2	DNA replication licensing factor MCM2	3920	24	1.53396	1.55048	1.51305	0.819314	0.845149	0.753787	0.728426	0.766741	0.676874	MCM2	0.989341	1	0.975854	0.528425	0.545088	0.486163	0.469806	0.494518	0.436557	1.53249	0.806083	0.724014	0.525994	1.56444e-05	-0.926881	4.80564	0.472441	8.80891e-06	-1.08179	5.05508	0.898187	0.09474	-0.154912	1.02347	904	101.832	5.51611	DNA replication and Repair	DNA replication and Repair	22		904
19857543	P25205	MCM3	DNA replication licensing factor MCM3	3967	33	1.58733	1.49356	1.53752	0.810613	0.819555	0.720216	0.687709	0.742019	0.683968	MCM3	1	0.940925	0.968617	0.510676	0.51631	0.453727	0.433248	0.467463	0.430891	1.53947	0.783462	0.704566	0.508916	5.45211e-05	-0.9745	4.26344	0.457667	1.44019e-05	-1.12763	4.84158	0.899298	0.0990298	-0.153128	1.00423	808	90.924	5.77002	DNA replication and Repair	DNA replication and Repair	23		808
123369	P09429	HMGB1	High mobility group protein B1	6033	42	1.36005	1.28871	1.59319	0.768741	0.705981	0.662256	0.630014	0.796873	0.80921	HMGB1	0.853667	0.808886	1	0.482517	0.443125	0.415679	0.395442	0.500175	0.507919	1.41398	0.712326	0.745366	0.503773	0.00193746	-0.989156	2.71277	0.527139	0.00353068	-0.923745	2.45214	1.04638	0.640629	0.0654111	0.193393	215	24.8782	5.74463	DNA replication and Repair	DNA replication and Repair	29		215
19858646	P33992	MCM5	DNA replication licensing factor MCM5	3753	15	1.53387	1.58372	1.52342	0.727862	0.776347	0.743871	0.648697	0.732416	0.655174	MCM5	0.968521	1	0.961921	0.459589	0.490204	0.469697	0.409602	0.462464	0.413692	1.547	0.74936	0.678763	0.484394	4.45205e-06	-1.04575	5.35144	0.438759	1.19605e-05	-1.1885	4.92225	0.90579	0.0812067	-0.142752	1.09041	734	82.2332	8.36768	DNA replication and Repair	DNA replication and Repair	25		734
68571766	P33991	MCM4	DNA replication licensing factor MCM4	4906	23	1.48285	1.59774	1.51362	0.744133	0.74221	0.71519	0.699548	0.735923	0.705285	MCM4	0.928095	1	0.947351	0.465742	0.464538	0.447627	0.437837	0.460603	0.441427	1.5314	0.733844	0.713586	0.479197	2.34642e-05	-1.06131	4.62959	0.465969	2.25983e-05	-1.1017	4.64592	0.972394	0.239049	-0.0403874	0.621514	863	96.4976	6.7417	DNA replication and Repair	DNA replication and Repair	24		863
17375506	Q15054	DPOD3	DNA polymerase delta subunit 3	5343	1	1.46144	1.66627	1.83328	0.781673	0.72035	0.82237	0.668341	0.811576	0.659841	DPOD3	0.797173	0.9089	1	0.42638	0.39293	0.448579	0.36456	0.442691	0.359924	1.65366	0.774798	0.713253	0.468534	0.00140253	-1.09377	2.85309	0.431317	0.00135435	-1.21318	2.86827	0.920566	0.344478	-0.119407	0.462838	466	51.3683	9.34912	DNA replication and Repair	DNA replication and Repair	17		466
729475	P39748	FEN1	Flap endonuclease 1	5670	12	1.30455	1.57954	1.87763	0.765056	0.785145	0.670953	0.756603	0.713825	0.622393	FEN1	0.694787	0.841241	1	0.407459	0.418158	0.357341	0.402957	0.380174	0.331478	1.58724	0.740385	0.697607	0.466461	0.00746053	-1.10017	2.12723	0.43951	0.00638962	-1.18603	2.19453	0.942222	0.464601	-0.0858607	0.33292	380	42.5661	8.6167	DNA replication and Repair	DNA replication and Repair	8		380
51338777	P49643	PRI2	DNA primase large subunit	5707	1	1.33797	1.57351	1.75856	0.698888	0.729768	0.591459	0.654842	0.917083	0.669253	PRI2	0.760833	0.894772	1	0.39742	0.41498	0.336331	0.372373	0.521496	0.380568	1.55668	0.673372	0.747059	0.432568	0.00236145	-1.209	2.62682	0.479905	0.0055011	-1.05918	2.25955	1.10943	0.480716	0.149819	0.318111	509	58.769	7.91357	DNA replication and Repair	DNA replication and Repair	15		509
51701495	O60814	H2B1K	Histone H2B type 1-K	216	560	1.71061	1.34061	1.50806	0.921753	1.2917	0.760537	0.883909	0.871144	0.957956	H2B1K	1	0.783705	0.881595	0.538845	0.75511	0.4446	0.516722	0.50926	0.560009	1.51976	0.991329	0.904336	0.652293	0.0498805	-0.616409	1.30207	0.595052	0.0050651	-0.748913	2.29541	0.912247	0.61455	-0.132504	0.211443	126	13.8816	10.3159	Histones	Histones	33		126
6016184	Q92522	H1X	Histone H1x	206	7	1.36428	1.29399	1.27927	0.900039	0.833295	0.813848	0.678862	0.913612	0.884246	H1X	1	0.948481	0.937693	0.659719	0.610797	0.596542	0.497598	0.669667	0.648143	1.31251	0.849061	0.825573	0.646897	0.000233765	-0.628393	3.63122	0.629002	0.00341352	-0.668864	2.4668	0.972337	0.779199	-0.0404718	0.108352	213	22.4735	10.7554	Histones	Histones	3		213
74749787	Q71UI9	H2AV	Histone H2A.V	214	168	1.59607	1.40392	1.22049	0.772031	0.842205	0.810132	0.52453	0.885763	0.873545	H2AV	1	0.879611	0.764686	0.483707	0.527674	0.507579	0.328639	0.554965	0.54731	1.40683	0.808123	0.76128	0.574429	0.0055893	-0.799799	2.25264	0.541132	0.015859	-0.885948	1.79972	0.942034	0.716503	-0.0861482	0.144782	128	13.5005	10.5796	Histones	Histones	14		128
19856407	P16401	H15	Histone H1.5	210	110	1.56923	1.40137	1.43622	0.782063	0.820659	0.754095	0.53955	0.798165	0.82832	H15	1	0.893028	0.915236	0.498374	0.522969	0.480551	0.343831	0.508635	0.527851	1.46894	0.785606	0.722012	0.534812	0.000235584	-0.902895	3.62785	0.49152	0.00206007	-1.02468	2.68612	0.919051	0.534379	-0.121783	0.27215	226	22.5665	10.9165	Histones	Histones	7		226
51701598	Q8N257	H2B3B	Histone H2B type 3-B	217	399	1.77803	1.59984	1.39918	0.814772	0.82018	0.868182	0.511109	1.04739	0.770561	H2B3B	1	0.899782	0.786925	0.458244	0.461286	0.488283	0.287458	0.589074	0.433379	1.59235	0.834378	0.776354	0.523992	0.00238415	-0.932383	2.62267	0.487553	0.012609	-1.03637	1.89932	0.930459	0.728413	-0.103986	0.137622	126	13.8995	10.3159	Histones	Histones	40		126
121925	P16402	H13	Histone H1.3	209	106	1.72064	1.59257	1.68112	0.723153	0.729983	0.632158	0.643871	0.739778	0.75497	H13	1	0.925571	0.977036	0.420282	0.424251	0.367397	0.374205	0.429944	0.438773	1.66478	0.695098	0.712873	0.417532	3.93208e-05	-1.26004	4.40538	0.428209	5.00728e-05	-1.22361	4.3004	1.02557	0.7242	0.0364281	0.140141	221	22.3363	11.019	Histones	Histones	6		221
18202479	Q02539	H11	Histone H1.1	207	51	1.817	1.78625	1.74049	0.6927	0.545188	0.592375	0.377307	0.602646	0.584559	H11	1	0.983077	0.957896	0.381233	0.300049	0.326018	0.207654	0.331671	0.321717	1.78125	0.610088	0.521504	0.342506	1.79435e-05	-1.5458	4.74609	0.292775	7.60971e-05	-1.77214	4.11863	0.854802	0.352957	-0.226339	0.452278	215	21.8289	10.9897	Histones	Histones	4		215
417101	P16403	H12	Histone H1.2	208	104	2.17684	1.54091	1.51595	0.623666	0.583089	0.568001	0.337629	0.73973	0.463244	H12	1	0.707867	0.696398	0.286501	0.26786	0.260929	0.155101	0.339819	0.212806	1.74457	0.591585	0.513534	0.339102	0.00602233	-1.56021	2.22024	0.294362	0.00754632	-1.76434	2.12226	0.868065	0.550655	-0.204125	0.25912	213	21.3517	10.9312	Histones	Histones	5		213
288558857	P09651	ROA1	Heterogeneous nuclear ribonucleoprotein A1	3532	109	1.21015	1.4151	1.4728	0.824023	0.851974	0.799736	0.610896	0.762443	0.733996	ROA1	0.821666	0.960822	1	0.559495	0.578473	0.543005	0.414786	0.517683	0.498368	1.36601	0.825245	0.702445	0.604126	0.00262974	-0.727079	2.58009	0.514229	0.0019808	-0.959516	2.70316	0.851196	0.0659434	-0.232437	1.18083	372	38.7231	9.12939	Transcriptional Regulation	Common component	3		372
190356061	Q32P51	RA1L2	Heterogeneous nuclear ribonucleoprotein A1-like 2	3970	60	1.62711	1.50179	1.41937	1.03425	0.881983	0.708465	0.561768	0.747953	0.613871	RA1L2	1	0.92298	0.872321	0.635633	0.542053	0.435412	0.345254	0.459681	0.377276	1.51609	0.874899	0.641197	0.577075	0.00458189	-0.793169	2.33896	0.422928	0.000436978	-1.24152	3.35954	0.732882	0.0991529	-0.448348	1.00369	320	34.2043	8.99756	Transcriptional Regulation	Common component	4		320
229462969	P17535	JUND	Transcription factor jun-D	6313	3	1.23191	1.32033	1.19541	0.813463	0.84762	0.790361	0.723028	0.887686	0.803579	JUND	0.933035	1	0.905388	0.616106	0.641976	0.598609	0.547611	0.672321	0.60862	1.24922	0.817148	0.804764	0.654127	0.000443286	-0.612357	3.35332	0.644214	0.00180451	-0.634387	2.74364	0.984845	0.817869	-0.0220307	0.0873164	347	35.1523	7.37158	Transcriptional Regulation	Transcriptional	3571		347
13431939	Q9Y6A5	TACC3	Transforming acidic coiled-coil-containing protein 3	5938	1	1.2057	1.54153	1.32487	0.90238	0.883241	0.726163	0.861866	0.78105	0.755124	TACC3	0.782142	1	0.85945	0.585379	0.572963	0.471066	0.559097	0.506672	0.489853	1.35737	0.837261	0.799347	0.616828	0.0100241	-0.69706	1.99895	0.588896	0.0057089	-0.763916	2.24345	0.954716	0.587766	-0.0668566	0.230796	838	90.3038	5.04639	Tanslation regulation	RNA Transporter	123		838
143811448	Q9BVS4	RIOK2	Serine/threonine-protein kinase RIO2	2049	2	1.25944	1.29683	1.4746	0.724871	0.6405	0.636551	0.791725	0.841517	0.788036	RIOK2	0.854091	0.879446	1	0.491572	0.434356	0.431678	0.53691	0.570676	0.534408	1.34362	0.667307	0.807093	0.496648	0.00072934	-1.0097	3.13707	0.600685	0.00144066	-0.73532	2.84144	1.20948	0.0141022	0.274383	1.85071	552	63.2432	5.93506	Tanslation regulation	Ribosome biogenesis(56)	56		552
29840784	Q8N448	LNX2	Ligand of Numb protein X 2	6591	1	1.47202	1.4561	1.391	0.774251	0.845883	0.951053	1.00279	0.777588	0.798995	LNX2	1	0.989185	0.944956	0.525977	0.574639	0.646085	0.681231	0.528244	0.542787	1.43971	0.857062	0.85979	0.595302	0.000516654	-0.748305	3.2868	0.597197	0.00157817	-0.74372	2.80185	1.00318	0.976817	0.00458506	0.010187	690	75.9562	6.63916	Ubiquitination	E3	5467		690
67462077	Q96T88	UHRF1	E3 ubiquitin-protein ligase UHRF1	2324	6	1.34198	1.6977	1.77373	0.779873	0.849844	0.784869	0.625867	0.687269	0.534227	UHRF1	0.756587	0.957138	1	0.43968	0.479129	0.442497	0.352855	0.387472	0.301189	1.60447	0.804862	0.615788	0.501638	0.00406642	-0.995282	2.39079	0.383796	0.00213796	-1.38159	2.67	0.765085	0.019223	-0.386308	1.71618	793	89.757	7.56201	Ubiquitination	E3	5525		793	Protein modification
23813917	Q13356	PPIL2	Peptidyl-prolyl cis-trans isomerase-like 2	4002	1	1.56885	1.42155	1.44916	0.737051	0.705304	0.62817	0.63112	0.628614	0.569899	PPIL2	1	0.906108	0.923706	0.469802	0.449566	0.400401	0.402281	0.400684	0.363258	1.47986	0.690175	0.609878	0.46638	0.000142475	-1.10042	3.84626	0.41212	6.12304e-05	-1.27886	4.21303	0.883657	0.102238	-0.178442	0.990386	520	58.7866	8.77783	Folding, sorting and degradation	Ubiquitin mediated proteolysis	47		520	Protein modification
52782787	Q8WXX5	DNJC9	DnaJ homolog subfamily C member 9	6435	5	1.3172	1.34898	1.53841	0.744716	0.775987	0.707187	0.69247	0.769988	0.780316	DNJC9	0.856209	0.876869	1	0.484082	0.504409	0.459687	0.450121	0.500509	0.507223	1.40153	0.74263	0.747591	0.529871	0.000785439	-0.916288	3.10489	0.533411	0.000924486	-0.906681	3.0341	1.00668	0.891407	0.00960684	0.0499239	260	29.8911	5.73193	Heat Shock Protein	HSP40/DnaJ	5075		260
51316484	Q8N5B7	CERS5	Ceramide synthase 5	5286	3	1.20427	1.41083	1.17671	0.675114	0.28364	0.594921	0.770842	0.909822	0.464615	CERS5	0.853586	1	0.834053	0.478522	0.201045	0.421682	0.546375	0.644884	0.32932	1.26393	0.517892	0.715093	0.409746	0.0060312	-1.2872	2.2196	0.565767	0.0219919	-0.821719	1.65774	1.38078	0.329137	0.46548	0.482623	392	45.7221	7.97217	lipid metabolism	Sphingolipid metabolism	971		392	Lipid metabolism
116241283	Q92793	CBP	CREB-binding protein	3272	1	1.5239	1.36604	1.17926	0.891003	0.842305	0.883975	0.591892	0.810675	0.57629	CBP	1	0.896408	0.773842	0.584684	0.552728	0.580072	0.388405	0.531972	0.378167	1.3564	0.872428	0.659619	0.643193	0.00862759	-0.636677	2.06411	0.486301	0.00508856	-1.04008	2.29341	0.756073	0.0509777	-0.403402	1.29262	2442	265.182	8.52881	Notch	Co-activator(MAML/HATs/SNW1)(8)	4		2442
38258809	Q8TAA9	VANG1	Vang-like protein 1	3397	1	1.3329	1.76121	1.30788	1.06642	0.887764	0.865167	0.826693	0.56783	0.52547	VANG1	0.756808	1	0.742603	0.605507	0.504065	0.491234	0.46939	0.322409	0.298357	1.46733	0.939785	0.639998	0.640474	0.030187	-0.642789	1.52018	0.436165	0.00905898	-1.19705	2.04292	0.681004	0.0577059	-0.554264	1.23878	524	59.9372	8.80713	Wnt	Regulator	5		524
120484	P15407	FOSL1	Fos-related antigen 1	2072	4	1.39553	1.31382	1.55412	0.936707	0.890975	0.940711	0.708431	0.820522	0.784253	FOSL1	0.897957	0.845376	1	0.602725	0.573299	0.605301	0.455841	0.527965	0.504628	1.42116	0.922798	0.771069	0.649329	0.00232528	-0.622979	2.63352	0.542564	0.00112647	-0.882134	2.94828	0.835577	0.014409	-0.259155	1.84137	271	29.3948	8.01611	Development	Osteoclast differentiation	63		271
14548264	O75326	SEM7A	Semaphorin-7A	5419	9	1.21447	1.4425	1.62583	0.866296	0.898552	0.830936	0.970174	0.618986	0.672128	SEM7A	0.746985	0.887242	1	0.532834	0.552673	0.511084	0.596726	0.38072	0.413406	1.4276	0.865261	0.753763	0.606095	0.00956211	-0.722385	2.01945	0.527993	0.014021	-0.92141	1.85322	0.871139	0.372048	-0.199025	0.429401	666	74.7762	7.63525	Development	Axon guidance	139	membrane-bound signaling molecule(PC00152)	666
129694	P12004	PCNA	Proliferating cell nuclear antigen	6193	49	1.28473	1.28458	1.45984	0.796661	0.822574	0.780283	0.675583	0.863543	0.800007	PCNA	0.880053	0.87995	1	0.54572	0.56347	0.534501	0.46278	0.591534	0.548012	1.34305	0.799839	0.779711	0.595539	0.000807852	-0.747731	3.09267	0.580553	0.00217961	-0.784502	2.66162	0.974835	0.739896	-0.0367703	0.130829	261	28.7503	4.69092	Cell Cycle	Proliferating regulator	1		261
1351226	P48307	TFPI2	Tissue factor pathway inhibitor 2	6086	6	0.577644	0.544324	0.50291	1.2809	1.13727	1.27203	0.59322	1.37102	1.36773	TFPI2	0.421323	0.39702	0.366814	0.934263	0.829505	0.927798	0.432684	1	0.9976	0.541626	1.23007	1.11066	2.27106	0.000177662	1.18337	3.75041	2.0506	0.0935073	1.03605	1.02915	0.902926	0.673199	-0.147321	0.171857	235	26.916	8.52881	ECM	enzyme	79		235
23396609	Q16270	IBP7	Insulin-like growth factor-binding protein 7	3017	38	0.576269	0.581332	0.576867	1.25709	1.30652	1.27691	1.21306	1.01552	1.05285	IBP7	0.441071	0.444947	0.441529	0.962164	1	0.97734	0.928466	0.777272	0.80584	0.578156	1.28017	1.09381	2.21424	1.07441e-06	1.14681	5.96883	1.89189	0.00104706	0.91983	2.98003	0.854422	0.0402245	-0.226979	1.39551	282	29.1114	7.89893	ECM	glycoprotein	104		282
1352311	P27487	DPP4	Dipeptidyl peptidase 4	5498	64	0.50962	0.443036	0.420522	1.02053	1.0349	0.955788	2.8086	0.925481	1.02689	DPP4	0.18145	0.157743	0.149727	0.363359	0.368476	0.340308	1	0.329517	0.365625	0.457726	1.00374	1.58699	2.19288	0.000112113	1.13283	3.95034	3.46712	0.138802	1.79374	0.857604	1.58108	0.394537	0.660909	0.403912	766	88.2225	6.03662	ECM	enzyme	31		766
115717	P07339	CATD	Cathepsin D	5789	185	0.668322	0.598668	0.549706	1.24018	1.31103	1.23422	1.46701	0.95544	1.01892	CATD	0.455568	0.408088	0.374712	0.845383	0.893679	0.841318	1	0.651286	0.694559	0.605565	1.26181	1.14712	2.08369	0.000101181	1.05914	3.9949	1.8943	0.0302258	0.921666	1.51962	0.909108	0.520155	-0.137476	0.283867	412	44.5236	6.53662	ECM	enzyme	25		412
135666	P13726	TF	Tissue factor	5339	8	0.70169	0.648951	0.425372	1.09042	1.19751	1.385	0.797481	1.21779	1.15378	TF	0.506635	0.468557	0.307128	0.78731	0.864627	1	0.575798	0.879269	0.833052	0.592004	1.22431	1.05635	2.06808	0.00635829	1.04829	2.19666	1.78436	0.0407093	0.835406	1.39031	0.862811	0.34371	-0.212884	0.463807	295	33.0468	7.03467	ECM	receptor	54		295
68067549	P07858	CATB	Cathepsin B	2188	108	0.692325	0.606723	0.545832	1.30297	1.24973	1.23598	1.16279	1.0341	1.08017	CATB	0.531343	0.465645	0.418913	1	0.959139	0.948585	0.892416	0.793643	0.829002	0.61496	1.2629	1.09235	2.05362	0.000162399	1.03817	3.78942	1.7763	0.0010945	0.828874	2.96078	0.864959	0.0163801	-0.209297	1.78568	339	37.7968	6.30322	ECM	enzyme	29		339
21903375	P27658	CO8A1	Collagen alpha-1(VIII) chain	6456	6	0.673757	0.623978	0.541421	1.06517	1.24106	1.12793	2.02826	0.746226	0.824468	CO8A1	0.332185	0.307643	0.266939	0.525166	0.611886	0.556107	1	0.367915	0.406491	0.613052	1.14472	1.19965	1.86725	0.00116926	0.900914	2.93209	1.95685	0.231982	0.968532	0.634546	1.04799	0.901818	0.0676184	0.0448811	744	73.3171	9.61279	ECM	Collagen	11		744
121110	P07093	GDN	Glia-derived nexin	6399	42	0.72535	0.578515	0.578239	1.10845	1.25315	1.1341	2.37877	0.670366	0.743867	GDN	0.304926	0.243199	0.243083	0.465977	0.526804	0.476759	1	0.281812	0.312711	0.627368	1.16523	1.26433	1.85734	0.00125066	0.893235	2.90286	2.0153	0.318691	1.01099	0.49663	1.08505	0.867994	0.11776	0.0614832	398	43.9742	9.29053	ECM	protease inhibitor	14		398
209572751	Q96HD1	CREL1	Cysteine-rich with EGF-like domain protein 1	1259	25	0.821957	0.660462	0.58532	1.18047	1.20344	1.22659	1.036	1.06628	1.10931	CREL1	0.670114	0.538453	0.477192	0.962399	0.981125	1	0.844615	0.869302	0.904383	0.689246	1.2035	1.07053	1.74611	0.00193549	0.804147	2.71321	1.55319	0.00640745	0.635233	2.19331	0.889512	0.00609045	-0.168914	2.21535	420	45.4088	4.86865	ECM	Glycoprotein	128		420
1703319	P09525	ANXA4	Annexin A4	1189	86	0.602783	0.586815	0.760511	1.05632	1.0942	1.07989	1.2027	1.18667	1.18351	ANXA4	0.501191	0.487914	0.632335	0.878289	0.909782	0.897882	1	0.986667	0.98404	0.650037	1.0768	1.19096	1.65652	0.00164819	0.728159	2.78299	1.83214	0.000631464	0.873531	3.19965	1.10602	0.000807416	0.145372	3.0929	319	35.8601	6.12549	ECM	regulator	28		319
296434458	Q8NFW1	COMA1	Collagen alpha-1(XXII) chain	5807	1	0.719615	0.624678	0.657828	0.980591	1.11002	1.13914	0.651974	1.76307	1.52056	COMA1	0.40816	0.354313	0.373115	0.556184	0.629596	0.64611	0.369795	1	0.862453	0.667374	1.07658	1.31187	1.61316	0.00187893	0.689893	2.72609	1.96572	0.129591	0.975057	0.887427	1.21855	0.52791	0.285164	0.27744	1626	161.046	7.2251	ECM	Collagen	21		1626
124970	P18084	ITB5	Integrin beta-5	5665	41	0.793126	0.637527	0.635144	1.14704	1.07022	1.06517	1.23526	1.05264	1.13827	ITB5	0.642074	0.516109	0.51418	0.928588	0.866399	0.862307	1	0.852167	0.921486	0.688599	1.09415	1.14206	1.58895	0.00228739	0.66807	2.64066	1.65852	0.00363991	0.7299	2.43891	1.04379	0.462514	0.0618294	0.334876	799	87.9962	6.06201	ECM	receptor	45		799
2842759	Q99538	LGMN	Legumain	433	11	0.643709	0.567022	0.478251	1.3532	1.57736	1.52876	1.06565	0.892297	0.912331	LGMN	0.408093	0.359475	0.303197	0.857889	1	0.969191	0.67559	0.56569	0.578391	0.562994	1.48644	0.956759	2.64024	0.000374662	1.40067	3.42636	1.69941	0.0056266	0.765035	2.24975	0.643658	0.00373699	-0.635635	2.42748	433	49.3794	6.55127	Lysosome	proteases(18)	389		433
160331912	P17900	SAP3	Ganglioside GM2 activator	4674	16	0.634426	0.542035	0.533998	1.28324	1.358	1.34534	1.39721	0.899457	0.9091	SAP3	0.454067	0.387942	0.38219	0.918431	0.971939	0.962875	1	0.643753	0.650655	0.570153	1.32886	1.06859	2.3307	4.39324e-05	1.22077	4.35721	1.87421	0.040884	0.906284	1.38845	0.80414	0.19187	-0.314481	0.716994	193	20.8247	5.31299	Lysosome	other lysosomal enzymes and activators(5)	425		193
12643324	Q9UBR2	CATZ	Cathepsin Z	1842	42	0.665234	0.63173	0.545968	1.26412	1.3183	1.32273	0.797171	0.998361	1.04681	CATZ	0.502924	0.477595	0.412757	0.955685	0.996649	1	0.60267	0.754772	0.791402	0.61431	1.30172	0.947448	2.11899	6.86287e-05	1.08337	4.16349	1.5423	0.0167774	0.62508	1.77527	0.727846	0.0108187	-0.458295	1.96582	303	33.8462	7.10791	Lysosome	proteases(18)	387		303
317373330	P53634	CATC	Dipeptidyl peptidase 1	1858	34	0.649154	0.589992	0.512102	1.19398	1.23643	1.23664	1.05524	1.10192	1.13755	CATC	0.524934	0.477094	0.414108	0.965507	0.999835	1	0.853312	0.891064	0.919869	0.583749	1.22235	1.09824	2.09397	0.000110588	1.06624	3.95629	1.88135	0.000372899	0.911767	3.42841	0.898461	0.011029	-0.154472	1.95746	463	51.8203	6.99072	Lysosome	proteases(18)	375		463
48429027	P61916	NPC2	Epididymal secretory protein E1	4677	49	0.724834	0.606275	0.5908	1.30401	1.37477	1.32753	1.40694	0.896316	0.908868	NPC2	0.515184	0.430917	0.419918	0.926842	0.977135	0.943558	1	0.637068	0.645989	0.640636	1.33544	1.07071	2.08455	0.000123649	1.05974	3.90781	1.67132	0.0681969	0.740989	1.16624	0.801766	0.193226	-0.318747	0.713934	151	16.5595	7.6499	Lysosome	minor lysosomal membrane proteins(20)	435		151
239938949	Q13510	ASAH1	Acid ceramidase	6522	42	0.697194	0.601799	0.503963	1.13343	1.27361	1.18212	1.67664	0.985379	0.982608	ASAH1	0.415829	0.358932	0.30058	0.676013	0.759622	0.705052	1	0.587712	0.586059	0.600986	1.19638	1.21487	1.9907	0.00100742	0.993278	2.99679	2.02147	0.0610356	1.0154	1.21442	1.01546	0.940942	0.0221264	0.0264371	395	44.6308	7.62061	Lysosome	ceramidase	421		395
1711493	P51688	SPHM	N-sulphoglucosamine sulphohydrolase	6242	24	0.721258	0.655833	0.524667	1.23263	1.32977	1.21757	1.64601	0.933719	0.98402	SPHM	0.438185	0.398438	0.318751	0.74886	0.807876	0.739711	1	0.567262	0.59782	0.63392	1.25999	1.18792	1.98762	0.00075811	0.991044	3.12027	1.87392	0.0793118	0.906062	1.10066	0.942797	0.771741	-0.0849814	0.112529	502	56.6595	6.94678	Lysosome	sulfatases(7)	413		502
134218	P07602	SAP	Prosaposin	5639	138	0.740585	0.614642	0.559017	1.19608	1.27232	1.19878	1.32671	1.02938	1.07272	SAP	0.558212	0.463283	0.421356	0.901541	0.959003	0.903572	1	0.775889	0.808554	0.638081	1.22239	1.14293	1.91573	0.00059237	0.937895	3.22741	1.79121	0.00923295	0.840931	2.03466	0.934998	0.45454	-0.0969647	0.342427	524	58.0739	5.17334	Lysosome	other lysosomal enzymes and activators(5)	423		524
127801	P17050	NAGAB	Alpha-N-acetylgalactosaminidase	4600	20	0.777525	0.680727	0.591502	1.23535	1.33127	1.3313	1.34056	0.945509	0.965484	NAGAB	0.579999	0.507792	0.441234	0.921513	0.993069	0.993092	1	0.705307	0.720208	0.683251	1.29931	1.08385	1.90165	0.000594774	0.927254	3.22565	1.58632	0.0451668	0.66568	1.34518	0.834177	0.179016	-0.261575	0.747109	411	46.5339	5.18604	Lysosome	glycosidases(16)	396		411
2498525	Q14108	SCRB2	Lysosome membrane protein 2	5119	43	0.752416	0.677487	0.612231	1.29312	1.23841	1.24376	1.35394	0.962766	0.983774	SCRB2	0.555722	0.500381	0.452184	0.955078	0.914671	0.91862	1	0.711083	0.7266	0.680711	1.25843	1.10016	1.8487	0.00019578	0.88651	3.70823	1.61619	0.0346528	0.692599	1.46026	0.874233	0.28464	-0.193911	0.545704	478	54.2555	5.13525	Lysosome	major lysosomal membrane proteins(6)	433		478
123081	P07686	HEXB	Beta-hexosaminidase subunit beta	6282	138	0.697986	0.652802	0.584509	1.1225	1.26967	1.17911	1.45415	0.983545	1.00146	HEXB	0.479997	0.448925	0.40196	0.771929	0.873135	0.810863	1	0.676373	0.688694	0.645099	1.19043	1.14638	1.84534	0.0005442	0.883885	3.26424	1.77707	0.0334216	0.829498	1.47597	0.963004	0.796531	-0.0543868	0.0987971	556	63.0712	6.75635	Lysosome	glycosidases(16)	401		556
20178316	P10619	PPGB	Lysosomal protective protein	5355	53	0.770964	0.683064	0.557993	1.18955	1.31356	1.19821	1.34052	0.976884	0.97774	PPGB	0.575122	0.50955	0.41625	0.887377	0.979886	0.893838	1	0.728733	0.729372	0.670674	1.23377	1.09838	1.8396	0.00156763	0.879394	2.80476	1.63773	0.0346271	0.711697	1.46058	0.890263	0.34814	-0.167697	0.458246	480	54.4311	6.60986	Lysosome	proteases(18)	373		480
83305902	O15118	NPC1	Niemann-Pick C1 protein	1491	33	0.709741	0.676087	0.676268	1.30962	1.24703	1.21259	1.08543	1.02647	0.984715	NPC1	0.541946	0.516248	0.516386	1	0.952214	0.925913	0.828818	0.783796	0.75191	0.687365	1.25641	1.03221	1.82787	4.87292e-05	0.870163	4.31221	1.50169	0.000385088	0.586583	3.41444	0.82155	0.00531825	-0.28358	2.27423	1278	142.074	5.36377	Lysosome	minor lysosomal membrane proteins(20)	434		1278
232126	P15586	GNS	N-acetylglucosamine-6-sulfatase	4338	66	0.799891	0.666407	0.63919	1.2786	1.26422	1.23799	1.27521	0.953352	0.977638	GNS	0.625599	0.5212	0.499914	1	0.988755	0.968235	0.997347	0.745622	0.764616	0.701829	1.26027	1.06873	1.79569	0.000396948	0.844541	3.40127	1.52278	0.0330025	0.606709	1.48145	0.848019	0.139771	-0.237831	0.854584	552	62.042	8.30908	Lysosome	sulfatases(7)	411		552
215273939	P16278	BGAL	Beta-galactosidase	6590	65	0.717117	0.672373	0.619956	1.12145	1.30087	1.12856	1.63223	0.915327	0.981245	BGAL	0.439349	0.411936	0.379822	0.687069	0.796991	0.691423	1	0.560784	0.601169	0.669815	1.18363	1.17627	1.7671	0.00138802	0.82138	2.8576	1.75611	0.0929338	0.81238	1.03183	0.993781	0.97663	-0.00899971	0.0102699	677	76.0266	6.56592	Lysosome	glycosidases(16)	392		677
51338734	O00462	MANBA	Beta-mannosidase	1241	11	0.719871	0.69509	0.690251	1.25829	1.23173	1.20118	1.12557	1.10764	1.08903	MANBA	0.572105	0.552411	0.548565	1	0.978896	0.954616	0.894524	0.880274	0.865488	0.701737	1.2304	1.10741	1.75336	9.67243e-06	0.810122	5.01446	1.5781	8.39282e-06	0.658188	5.07609	0.900043	0.00328155	-0.151935	2.48392	879	100.831	5.51611	Lysosome	glycosidases(16)	402		879	Glycan metabolism
311033393	P06865	HEXA	Beta-hexosaminidase subunit alpha	5531	53	0.811989	0.697175	0.611273	1.16601	1.2752	1.21833	1.36599	0.954362	0.939861	HEXA	0.594432	0.51038	0.447494	0.853602	0.933532	0.891901	1	0.698659	0.688043	0.706812	1.21985	1.08674	1.72584	0.00148856	0.7873	2.82723	1.53752	0.065989	0.620605	1.18053	0.890881	0.405243	-0.166695	0.392285	529	60.6643	5.16064	Lysosome	glycosidases(16)	400		529
114223	P15848	ARSB	Arylsulfatase B	6252	19	0.751544	0.726305	0.638738	1.19078	1.249	1.16436	1.47636	0.98877	0.991186	ARSB	0.509052	0.491957	0.432644	0.806563	0.845999	0.788673	1	0.669735	0.671372	0.705529	1.20138	1.1521	1.70281	0.000304265	0.767916	3.51675	1.63297	0.0543637	0.707495	1.26469	0.958985	0.778855	-0.0604204	0.108543	533	59.6494	8.20654	Lysosome	sulfatases(7)	408		533
92090608	P35475	IDUA	Alpha-L-iduronidase	6491	10	0.76126	0.645722	0.648333	1.13658	1.2499	1.07852	1.48369	0.977197	1.05516	IDUA	0.513086	0.435213	0.436974	0.76605	0.842429	0.726917	1	0.658626	0.711173	0.685105	1.155	1.17202	1.68587	0.00173807	0.753497	2.75993	1.71071	0.0397174	0.774594	1.40102	1.01473	0.922974	0.0210971	0.0348108	653	72.6245	9.14404	Lysosome	glycosidases(16)	395		653
114221	P15289	ARSA	Arylsulfatase A	5482	27	0.739146	0.719403	0.679966	1.17384	1.22987	1.13985	1.27799	0.952771	1.0143	ARSA	0.578365	0.562917	0.532058	0.918505	0.962345	0.891906	1	0.745522	0.793667	0.712838	1.18119	1.08169	1.65702	0.000118968	0.728589	3.92457	1.51744	0.0219087	0.601637	1.65938	0.915764	0.389333	-0.126953	0.409679	507	53.5537	6.07471	Lysosome	sulfatases(7)	407		507
317373572	P10253	LYAG	Lysosomal alpha-glucosidase	6274	54	0.755032	0.688013	0.614198	1.14623	1.1569	1.09991	1.59503	0.967626	1.01029	LYAG	0.473364	0.431347	0.385069	0.718625	0.725315	0.689582	1	0.606649	0.633396	0.685748	1.13435	1.19098	1.65418	0.000534083	0.726112	3.27239	1.73676	0.0706512	0.796402	1.15088	1.04993	0.794234	0.07029	0.100052	952	105.257	5.99854	Lysosome	glycosidases(16)	393		952
55584151	P04062	GLCM	Glucosylceramidase	6264	50	0.764048	0.679396	0.682478	1.09108	1.17946	1.11437	1.47906	0.99238	1.04846	GLCM	0.516577	0.459343	0.461427	0.737686	0.797442	0.753432	1	0.670953	0.70887	0.708641	1.12831	1.1733	1.59221	0.000394553	0.671032	3.40389	1.65571	0.0409604	0.727446	1.38764	1.03988	0.787338	0.0564148	0.103839	536	59.6782	7.60596	Lysosome	glycosidases(16)	394		536
93141317	Q9Y657	SPIN1	Spindlin-1	2008	1	1.24402	1.29203	1.44765	0.865148	0.924556	0.86885	0.722378	0.77876	0.79259	SPIN1	0.859332	0.892499	1	0.597621	0.638658	0.600178	0.498999	0.537946	0.547499	1.3279	0.886185	0.764576	0.667358	0.00236487	-0.583467	2.62619	0.575778	0.000981345	-0.796415	3.00818	0.862773	0.0134747	-0.212948	1.87048	262	29.5818	6.96143					262
50401852	P62633	CNBP	Cellular nucleic acid-binding protein	6518	29	1.2288	1.29443	1.43103	0.905931	0.856628	0.876253	0.943858	0.914088	0.766894	CNBP	0.858685	0.904544	1	0.633062	0.598609	0.612323	0.659565	0.638762	0.535903	1.31809	0.879604	0.874947	0.667333	0.00201672	-0.583522	2.69536	0.663799	0.00540071	-0.591181	2.26755	0.994705	0.938322	-0.00765888	0.027648	177	19.4496	7.7085					177
37999713	Q8N806	UBR7	Putative E3 ubiquitin-protein ligase UBR7	5696	5	1.16843	1.32527	1.46797	0.792333	0.816653	1.03448	0.848676	0.860991	0.726513	UBR7	0.795948	0.902788	1	0.539746	0.556313	0.7047	0.578128	0.586517	0.494909	1.32056	0.881156	0.81206	0.66726	0.0191934	-0.583678	1.71685	0.614937	0.00622983	-0.701489	2.20552	0.921585	0.476899	-0.117811	0.321573	425	47.9677	4.80518					425	Protein modification
74733605	Q9H6F5	CCD86	Coiled-coil domain-containing protein 86	6271	4	1.18903	1.37383	1.46265	1.00898	0.86392	0.805831	0.87234	0.899527	0.854711	CCD86	0.812931	0.939272	1	0.689827	0.590654	0.550939	0.59641	0.614998	0.584358	1.34184	0.892909	0.875526	0.665438	0.011183	-0.587624	1.95144	0.652483	0.00464608	-0.615987	2.33291	0.980532	0.79244	-0.0283632	0.101034	360	40.2113	10.3306					360
45593726	Q99986	VRK1	Serine/threonine-protein kinase VRK1	4036	4	1.26331	1.33722	1.40674	0.899549	0.889855	0.842469	0.824072	0.855447	0.789266	VRK1	0.898039	0.950576	1	0.639455	0.632565	0.59888	0.585802	0.608105	0.56106	1.33576	0.877291	0.822928	0.656775	0.000523327	-0.606528	3.28123	0.616077	0.000356405	-0.698817	3.44806	0.938033	0.104778	-0.092289	0.979728	396	45.4474	8.90967					396
74762382	Q6XE24	RBMS3	RNA-binding motif, single-stranded-interacting protein 3	6582	11	1.40451	1.25059	1.11419	0.929281	0.76062	0.784235	0.74082	0.849488	0.876807	RBMS3	1	0.890412	0.793298	0.661641	0.541556	0.55837	0.527458	0.604829	0.62428	1.25643	0.824712	0.822372	0.656392	0.0120781	-0.60737	1.918	0.654529	0.00974525	-0.61147	2.01121	0.997162	0.973853	-0.00410021	0.0115066	437	47.8093	8.03076					437
68565853	O75475	PSIP1	PC4 and SFRS1-interacting protein	6056	27	1.37791	1.32892	1.2365	0.87306	0.86547	0.84896	0.707646	0.878914	0.910497	PSIP1	1	0.964449	0.897369	0.633611	0.628103	0.616121	0.513564	0.63786	0.66078	1.31444	0.862497	0.832352	0.656169	0.000425468	-0.607862	3.37113	0.633235	0.00307683	-0.659186	2.5119	0.96505	0.659339	-0.0513244	0.180891	530	60.0667	9.12939					530
27734580	Q9BWG4	SSBP4	Single-stranded DNA-binding protein 4	2453	1	1.43776	1.33664	1.05189	0.852844	0.860675	0.785132	0.620061	0.698666	0.733404	SSBP4	1	0.929674	0.731621	0.593177	0.598624	0.546082	0.43127	0.485942	0.510103	1.27543	0.832884	0.684044	0.653022	0.0199296	-0.614798	1.7005	0.536324	0.00794886	-0.898825	2.0997	0.821295	0.0225407	-0.284027	1.64703	385	39.3625	6.80029					385
229462967	Q9BT25	HAUS8	HAUS augmin-like complex subunit 8	5627	2	1.34551	1.46598	1.77648	1.18935	0.939974	0.853863	0.823784	0.989239	0.889948	HAUS8	0.757404	0.825216	1	0.669499	0.529122	0.480649	0.463717	0.556854	0.500962	1.52932	0.994396	0.90099	0.65022	0.030506	-0.621001	1.51561	0.589143	0.0101565	-0.76331	1.99325	0.906068	0.449313	-0.142309	0.347451	410	44.83	7.06396					410
74734328	Q9NRX1	PNO1	RNA-binding protein PNO1	5358	6	1.21774	1.53778	1.54434	0.913583	0.848791	1.02984	0.770534	0.966728	0.797396	PNO1	0.788521	0.995752	1	0.591569	0.549614	0.666849	0.498941	0.625982	0.516335	1.43329	0.930738	0.844886	0.649373	0.0138678	-0.622881	1.85799	0.589474	0.00901695	-0.762499	2.04494	0.907759	0.349457	-0.139619	0.456606	252	27.9069	9.72998					252
190360168	Q96EY4	TMA16	Translation machinery-associated protein 16	4242	4	1.18767	1.25668	1.37119	0.811198	0.854745	0.804097	0.665386	0.784724	0.779717	TMA16	0.86616	0.916488	1	0.591602	0.623361	0.586424	0.485263	0.572295	0.568643	1.27184	0.823347	0.743276	0.647364	0.00130141	-0.627351	2.88558	0.584408	0.00133403	-0.774953	2.87484	0.90275	0.129714	-0.147602	0.887013	203	23.8494	9.26123					203
24636245	Q9H2P0	ADNP	Activity-dependent neuroprotector homeobox protein	4509	11	1.14501	1.39545	1.25719	0.862801	0.786248	0.809238	0.680328	0.802483	0.759614	ADNP	0.820534	1	0.900923	0.618298	0.563439	0.579913	0.487535	0.575073	0.544352	1.26588	0.819429	0.747475	0.647319	0.00417343	-0.627452	2.37951	0.590478	0.00303036	-0.760046	2.51851	0.91219	0.164644	-0.132594	0.783454	1102	123.485	7.34229					1102
30580364	Q9BV73	CP250	Centrosome-associated protein CEP250	6310	2	1.27116	1.29531	1.16417	0.792661	0.751038	0.868304	0.983448	0.679644	0.819736	CP250	0.981355	1	0.898757	0.611946	0.579813	0.670344	0.759237	0.524696	0.632848	1.24355	0.804001	0.827609	0.646538	0.0011486	-0.629192	2.93983	0.665523	0.012586	-0.587439	1.90011	1.02936	0.814571	0.0417526	0.0890712	2442	280.967	5.021					2442
73921721	Q68CP9	ARID2	AT-rich interactive domain-containing protein 2	6381	2	1.33474	1.46607	1.30377	0.926769	0.903205	0.817056	0.974638	0.837198	0.799669	ARID2	0.91042	1	0.889293	0.632145	0.616072	0.55731	0.664796	0.571049	0.545451	1.36819	0.882343	0.870502	0.644897	0.00125549	-0.632859	2.90119	0.636242	0.00239798	-0.652352	2.62015	0.986579	0.859555	-0.0194931	0.0657263	1835	197.268	7.41553					1835
1174689	P42166	LAP2A	Lamina-associated polypeptide 2, isoform alpha	3746	45	1.29826	1.48121	1.39838	0.89827	0.923863	0.867721	0.824625	0.862581	0.754233	LAP2A	0.876485	1	0.944078	0.606444	0.623722	0.585819	0.556724	0.582349	0.509201	1.39262	0.896618	0.813813	0.643838	0.000856535	-0.635231	3.06725	0.584377	0.000718728	-0.775028	3.14344	0.907647	0.0808868	-0.139797	1.09212	694	75.4456	7.66455					694
1174690	P42167	LAP2B	Lamina-associated polypeptide 2, isoforms beta/gamma	6106	43	1.40372	1.28613	1.21664	0.858418	0.843425	0.803396	0.705709	0.86966	0.857915	LAP2B	1	0.91623	0.866724	0.611529	0.600848	0.572332	0.50274	0.619537	0.611171	1.30217	0.83508	0.811095	0.6413	0.00120932	-0.640929	2.91746	0.622881	0.00294777	-0.682972	2.53051	0.971278	0.68684	-0.0420433	0.163144	454	50.6395	9.37842					454
146325818	O95785	WIZ	Protein Wiz	4231	2	1.35706	1.51463	1.30112	0.886849	0.913233	0.860717	0.708584	0.879937	0.773182	WIZ	0.895967	1	0.859034	0.585522	0.602941	0.568269	0.467826	0.580958	0.510476	1.39094	0.886933	0.787235	0.637652	0.00155187	-0.649159	2.80914	0.565975	0.00174189	-0.821191	2.75898	0.887592	0.128817	-0.172032	0.890026	1651	178.563	6.85889					1651
215273870	O43663	PRC1	Protein regulator of cytokinesis 1	2257	3	1.26939	1.36208	1.64904	0.918221	0.902164	0.898405	0.794649	0.852257	0.76473	PRC1	0.769773	0.825985	1	0.556822	0.547085	0.544805	0.481886	0.516821	0.463743	1.42684	0.906263	0.803879	0.635156	0.0104267	-0.654816	1.98185	0.5634	0.00601157	-0.827768	2.22101	0.887026	0.0178551	-0.172952	1.74824	620	71.5616	6.68311					620
229462882	Q7Z5L9	I2BP2	Interferon regulatory factor 2-binding protein 2	5370	6	1.12723	1.13322	1.22666	0.758215	0.729755	0.719787	0.78082	0.795605	0.716184	I2BP2	0.918943	0.923827	1	0.618115	0.594913	0.586787	0.636543	0.648596	0.58385	1.16237	0.735919	0.764203	0.63312	0.000237571	-0.659449	3.62421	0.657453	0.000593682	-0.60504	3.22645	1.03843	0.353447	0.0544089	0.451676	587	60.9867	8.68994					587
300669615	Q2TBE0	C19L2	CWF19-like protein 2	5865	1	1.1192	1.39907	1.31705	0.827817	0.702667	0.895653	0.577585	0.807054	0.846027	C19L2	0.799958	1	0.941376	0.591691	0.502239	0.640178	0.412835	0.57685	0.604707	1.27844	0.808712	0.743555	0.632578	0.0094821	-0.660685	2.0231	0.581612	0.0105397	-0.781872	1.97717	0.919431	0.554117	-0.121187	0.256399	894	103.722	8.646					894
1710620	P98179	RBM3	Putative RNA-binding protein 3	1301	18	1.4452	1.36038	1.3696	0.894969	0.89385	0.838572	0.735043	0.761909	0.781631	RBM3	1	0.941315	0.947692	0.619271	0.618497	0.580248	0.508611	0.527201	0.540847	1.39173	0.875797	0.759528	0.629288	9.41183e-05	-0.668209	4.02633	0.545744	3.02444e-05	-0.873702	4.51935	0.867242	0.00720025	-0.205494	2.14265	157	17.16	8.90967					157
74750476	Q86VY9	T200A	Transmembrane protein 200A	5830	7	1.51626	1.28284	1.51458	0.90424	0.907551	0.88158	1.15692	0.570623	0.57225	T200A	1	0.846051	0.998891	0.59636	0.598544	0.581416	0.763007	0.376335	0.377407	1.4379	0.897791	0.766598	0.624378	0.00227856	-0.679508	2.64234	0.533139	0.0330049	-0.907417	1.48142	0.853872	0.53861	-0.227909	0.268726	491	54.3218	9.17334					491
6174916	P54821	PRRX1	Paired mesoderm homeobox protein 1	5541	1	1.36324	1.37333	1.60223	0.938138	0.83534	0.92033	0.96901	0.785938	0.709374	PRRX1	0.850836	0.857133	1	0.58552	0.521361	0.574405	0.604788	0.490527	0.442742	1.44626	0.897936	0.821441	0.620866	0.00287465	-0.687646	2.54141	0.567974	0.00468632	-0.816102	2.32917	0.91481	0.410413	-0.128456	0.386778	245	27.2798	9.46631					245
74753026	Q9NWK9	BCD1	Box C/D snoRNA protein 1	5398	2	1.20756	1.54277	1.47678	0.932964	0.863535	0.787823	0.823125	0.860934	0.712282	BCD1	0.782722	1	0.957227	0.604733	0.55973	0.510655	0.533537	0.558044	0.46169	1.40904	0.861441	0.79878	0.611368	0.00779441	-0.709887	2.10822	0.566898	0.00547691	-0.81884	2.26146	0.927261	0.363822	-0.108953	0.439111	470	53.8842	5.79541					470
544357	P35637	FUS	RNA-binding protein FUS	5535	45	1.39928	1.29938	1.33792	0.838234	0.846432	0.7702	0.694168	0.787144	0.838657	FUS	1	0.928608	0.956148	0.599048	0.604907	0.550427	0.496091	0.562537	0.59935	1.34552	0.818289	0.773323	0.608156	0.000153446	-0.717486	3.81405	0.574738	0.000368229	-0.799025	3.43388	0.945049	0.408053	-0.081539	0.389283	526	53.3938	9.36377					526
259016362	Q15021	CND1	Condensin complex subunit 1	5971	11	1.21454	1.31787	1.44827	0.836812	0.801839	0.770302	0.76135	0.850657	0.857423	CND1	0.838615	0.909964	1	0.577801	0.553653	0.531877	0.525696	0.587361	0.592032	1.32689	0.802984	0.823143	0.60516	0.00173171	-0.72461	2.76153	0.620353	0.00247919	-0.688839	2.60569	1.0251	0.609518	0.0357716	0.215014	1401	157.082	6.60986					1401
152032456	Q8N539	FBCD1	Fibrinogen C domain-containing protein 1	447	1	1.92973	1.95913	0.86889	1.05329	0.873746	0.936594	0.585377	0.534737	0.508779	FBCD1	0.984994	1	0.443509	0.537632	0.445988	0.478067	0.298795	0.272947	0.259697	1.58591	0.954543	0.542964	0.601888	0.15648	-0.732433	0.805542	0.342367	0.0440036	-1.54639	1.35651	0.568821	0.00197783	-0.813953	2.70381	461	50.712	6.48096					461
74732939	Q9BRX5	PSF3	DNA replication complex GINS protein PSF3	6286	1	1.16346	1.38243	1.42851	0.863045	0.798446	0.72306	0.792054	0.76356	0.794628	PSF3	0.814458	0.96774	1	0.604157	0.558936	0.506163	0.554461	0.534515	0.556263	1.3248	0.79485	0.783414	0.599977	0.00436793	-0.73702	2.35972	0.591345	0.00277227	-0.757928	2.55717	0.985612	0.797271	-0.0209082	0.0983943	216	24.5192	5.33838					216
116242852	Q8N567	ZCHC9	Zinc finger CCHC domain-containing protein 9	4016	1	1.6637	1.41755	1.66801	1.0031	0.89691	0.934196	0.598452	0.829738	0.854873	ZCHC9	0.997414	0.849845	1	0.601374	0.537713	0.560066	0.358782	0.497442	0.512511	1.58309	0.944735	0.761021	0.596768	0.00195282	-0.744758	2.70934	0.48072	0.00210951	-1.05673	2.67582	0.805539	0.103236	-0.311973	0.986169	271	30.4572	9.17334					271
145559503	Q14978	NOLC1	Nucleolar and coiled-body phosphoprotein 1	2336	29	1.25075	1.40518	1.50187	0.809912	0.838439	0.798162	0.74836	0.771688	0.768021	NOLC1	0.832793	0.93562	1	0.539268	0.558263	0.531445	0.498285	0.513818	0.511376	1.38593	0.815504	0.76269	0.588415	0.00153208	-0.765094	2.81472	0.550307	0.0010596	-0.86169	2.97486	0.935237	0.0194751	-0.0965962	1.71052	699	73.5596	9.46631					699
61212932	O00148	DX39A	ATP-dependent RNA helicase DDX39A	4463	38	1.27882	1.31821	1.57616	0.782737	0.853733	0.817779	0.770079	0.801807	0.75003	DX39A	0.811349	0.836345	1	0.49661	0.541654	0.518843	0.488579	0.508709	0.475859	1.39106	0.818083	0.773972	0.588099	0.00387862	-0.765869	2.41132	0.556389	0.00283589	-0.845835	2.54731	0.94608	0.157968	-0.0799659	0.80143	427	49.098	5.68115					427
296439379	P39880	CUX1	Homeobox protein cut-like 1	5622	14	1.30493	1.30915	1.39839	0.858592	0.738494	0.76259	0.630814	0.830159	0.726539	CUX1	0.933169	0.936186	1	0.613987	0.528104	0.545335	0.451101	0.593655	0.519555	1.33749	0.786558	0.72917	0.588086	0.000320648	-0.765902	3.49397	0.545179	0.000731577	-0.875199	3.13574	0.927039	0.447795	-0.109298	0.348921	1505	164.087	5.89697					1505
296452846	Q8NDV7	TNR6A	Trinucleotide repeat-containing gene 6A protein	3433	4	1.31877	1.40817	1.46067	0.847624	0.788902	0.808345	0.926177	1.0099	0.86454	TNR6A	0.902855	0.964056	1	0.580298	0.540096	0.553407	0.634077	0.691394	0.591879	1.39587	0.814957	0.933539	0.583834	0.000205459	-0.776369	3.68727	0.668786	0.00143923	-0.580383	2.84187	1.14551	0.0597504	0.195986	1.22366	1962	210.169	7.00537					1962
209572692	Q92995	UBP13	Ubiquitin carboxyl-terminal hydrolase 13	4212	3	1.40914	1.32508	1.51431	0.82992	0.892696	0.747327	0.875381	0.924517	0.9369	UBP13	0.930545	0.875035	1	0.548051	0.589506	0.493509	0.578071	0.610519	0.618696	1.41618	0.823315	0.912266	0.581365	0.00101114	-0.782485	2.99519	0.644176	0.000958169	-0.634474	3.01856	1.10804	0.125859	0.148011	0.900117	863	97.2651	5.52881					863
160185484	Q9NUQ6	SPS2L	SPATS2-like protein	2207	22	1.19144	1.30211	1.5451	0.786121	0.801839	0.717888	0.858908	0.925358	0.907617	SPS2L	0.77111	0.842735	1	0.508785	0.518958	0.464624	0.555893	0.5989	0.587418	1.34621	0.768616	0.897295	0.570947	0.00581085	-0.808572	2.23576	0.666532	0.013452	-0.585254	1.87121	1.16742	0.0167466	0.223318	1.77607	558	61.6907	9.64209					558
110832751	Q9H9F9	ARP5	Actin-related protein 5	6516	1	1.58939	1.45767	1.33724	0.768159	0.94609	0.7865	0.674397	0.884642	0.91732	ARP5	1	0.917124	0.841354	0.483305	0.595254	0.494845	0.424313	0.556593	0.577153	1.46143	0.833583	0.825453	0.570388	0.00242685	-0.809983	2.61496	0.564825	0.00379435	-0.824123	2.42086	0.990247	0.935776	-0.0141396	0.0288283	607	68.2543	5.2749					607
145559537	O95801	TTC4	Tetratricopeptide repeat protein 4	6159	2	1.41281	1.60125	1.32373	0.887645	0.780037	0.798932	0.86964	0.777901	0.76505	TTC4	0.88232	1	0.826686	0.554346	0.487143	0.498943	0.543102	0.485809	0.477784	1.44593	0.822205	0.804197	0.568634	0.00211673	-0.814428	2.67434	0.55618	0.00189469	-0.846376	2.72246	0.978098	0.71966	-0.0319484	0.142873	387	44.6503	5.60498					387
23396468	Q9HB09	B2L12	Bcl-2-like protein 12	4149	3	1.28895	1.58242	1.30357	0.733495	0.892801	0.737607	0.732689	0.616167	0.637564	B2L12	0.814545	1	0.823785	0.463528	0.5642	0.466126	0.463018	0.389383	0.402904	1.39165	0.787968	0.66214	0.566212	0.00518354	-0.820586	2.28537	0.475796	0.00202036	-1.07159	2.69457	0.840314	0.118563	-0.251	0.926052	334	36.7983	9.21729					334
116241306	Q15003	CND2	Condensin complex subunit 2	6519	8	1.17639	1.32694	1.56503	0.729017	0.818907	0.736901	0.71478	0.811425	0.76837	CND2	0.751668	0.847868	1	0.465816	0.523251	0.470853	0.456718	0.518471	0.49096	1.35612	0.761608	0.764858	0.561608	0.00701657	-0.832365	2.15388	0.564004	0.00711302	-0.826223	2.14795	1.00427	0.939292	0.00614266	0.0271994	741	82.5113	5.05908					741
28558057	O75717	WDHD1	WD repeat and HMG-box DNA-binding protein 1	4562	3	1.17476	1.48731	1.70452	0.858494	0.878403	0.705043	0.783408	0.650042	0.664709	WDHD1	0.689203	0.87257	1	0.503658	0.515338	0.413632	0.459606	0.381364	0.389968	1.45553	0.81398	0.699386	0.559233	0.0170932	-0.83848	1.76718	0.480503	0.00902142	-1.05738	2.04473	0.859218	0.172858	-0.218904	0.762311	1129	125.888	5.61768					1129
76803798	P29966	MARCS	Myristoylated alanine-rich C-kinase substrate	5168	83	1.72604	1.50814	1.21054	0.79614	0.798586	0.878204	0.855214	0.726109	0.678685	MARCS	1	0.873757	0.701337	0.461252	0.462669	0.508796	0.495476	0.420679	0.393203	1.48157	0.82431	0.753336	0.556374	0.0123564	-0.845872	1.90811	0.50847	0.0100594	-0.975766	1.99743	0.913899	0.296987	-0.129894	0.527262	332	31.5359	4.44971					332
23503077	P49321	NASP	Nuclear autoantigenic sperm protein	5472	33	1.47088	1.40856	1.36301	0.779814	0.777472	0.775468	0.628269	0.817441	0.727897	NASP	1	0.957631	0.926658	0.530166	0.528575	0.527212	0.427137	0.555748	0.49487	1.41415	0.777585	0.724536	0.549859	3.44765e-05	-0.862866	4.46248	0.512346	0.000394395	-0.964809	3.40407	0.931777	0.38666	-0.101943	0.412671	788	85.1861	4.29736					788
229462806	P52747	ZN143	Zinc finger protein 143	6318	1	1.27985	1.35214	1.38381	0.889719	0.626182	0.691929	0.719249	0.781071	0.766997	ZN143	0.924877	0.977115	1	0.642951	0.452507	0.500019	0.519761	0.564437	0.554266	1.3386	0.735944	0.755772	0.549787	0.00208592	-0.863056	2.6807	0.5646	8.52122e-05	-0.824699	4.0695	1.02694	0.819474	0.0383566	0.086465	638	68.8534	6.04932					638
215273886	O95347	SMC2	Structural maintenance of chromosomes protein 2	4479	32	1.29225	1.46174	1.64284	0.788206	0.813697	0.791011	0.647019	0.797286	0.721063	SMC2	0.786597	0.889767	1	0.479783	0.4953	0.481491	0.393842	0.48531	0.438913	1.46561	0.797638	0.721789	0.544236	0.00276463	-0.877697	2.55836	0.492483	0.00250563	-1.02185	2.60108	0.904908	0.160741	-0.144157	0.793874	1197	135.572	8.42627					1197
41018369	Q9P2Z0	THA10	THAP domain-containing protein 10	3930	1	1.30887	1.17821	1.50461	0.57667	0.817144	0.745073	0.864111	0.968795	0.838226	THA10	0.869906	0.783062	1	0.383268	0.543092	0.495192	0.574308	0.643883	0.557104	1.33056	0.712962	0.890377	0.535835	0.00648868	-0.90014	2.18784	0.669173	0.0128718	-0.579549	1.89036	1.24884	0.0955575	0.320592	1.01974	257	28.3331	8.60205					257
30173386	Q9NTJ3	SMC4	Structural maintenance of chromosomes protein 4	6089	23	1.29818	1.43414	1.65715	0.780192	0.798792	0.76949	0.719278	0.83974	0.737362	SMC4	0.78338	0.865429	1	0.470803	0.482028	0.464346	0.434046	0.506737	0.444958	1.46316	0.782825	0.76546	0.535024	0.00292289	-0.902324	2.53419	0.523156	0.00328901	-0.934686	2.48293	0.977818	0.6751	-0.0323622	0.170632	1288	147.091	6.78564					1288
41688816	Q96T58	MINT	Msx2-interacting protein	5134	3	1.56492	1.51358	1.47496	0.826786	0.868926	0.735996	0.819585	0.972519	0.860629	MINT	1	0.967195	0.942514	0.528326	0.555254	0.47031	0.523724	0.621451	0.549952	1.51782	0.81057	0.884244	0.534037	0.000114483	-0.90499	3.94126	0.582576	0.000272525	-0.779481	3.56459	1.09089	0.288329	0.125509	0.540112	3664	402.004	7.63525					3664
74733630	Q9H7E9	CH033	UPF0488 protein C8orf33	5507	1	1.52542	1.53501	1.54347	0.781958	0.807083	0.819146	0.759794	0.832974	0.706475	CH033	0.988305	0.994521	1	0.506624	0.522902	0.530718	0.492264	0.539677	0.457719	1.53463	0.802729	0.766414	0.523076	4.52106e-07	-0.934907	6.34476	0.499413	3.19157e-05	-1.0017	4.496	0.954761	0.396379	-0.0667886	0.401889	229	24.9769	9.94971					229
123374	P26583	HMGB2	High mobility group protein B2	5841	20	1.51803	1.3521	1.39663	0.716404	0.827674	0.676385	0.793245	0.742665	0.779931	HMGB2	1	0.890698	0.920031	0.471931	0.54523	0.445568	0.52255	0.48923	0.51378	1.42225	0.740154	0.771947	0.520409	0.000528381	-0.942281	3.27705	0.542763	0.000232377	-0.881605	3.63381	1.04295	0.541743	0.0606762	0.266207	209	24.0187	7.81104					209
296452915	Q6ZWJ1	STXB4	Syntaxin-binding protein 4	5220	1	1.30266	1.59646	1.46771	0.842623	0.674791	0.728524	0.456473	0.816167	0.563234	STXB4	0.815968	1	0.919354	0.527808	0.422681	0.456338	0.285929	0.511237	0.352803	1.45561	0.748646	0.611958	0.514319	0.00198647	-0.959266	2.70192	0.420414	0.00347239	-1.25012	2.45937	0.81742	0.309638	-0.290851	0.509145	553	61.6234	5.19873					553
118572664	Q02241	KIF23	Kinesin-like protein KIF23	2953	6	1.33019	1.47985	1.88356	0.850836	0.785106	0.767508	0.729682	0.690498	0.628432	KIF23	0.706212	0.785666	1	0.451718	0.416822	0.407479	0.387396	0.366593	0.333642	1.56453	0.80115	0.682871	0.512071	0.0102931	-0.965585	1.98745	0.43647	0.00628816	-1.19604	2.20148	0.852363	0.0383268	-0.23046	1.4165	960	109.99	8.51416					960
82654946	P42695	CNDD3	Condensin-2 complex subunit D3	5963	2	1.354	1.51196	1.65378	0.789729	0.770179	0.674578	0.761148	0.745348	0.640806	CNDD3	0.818732	0.91425	1	0.477531	0.465709	0.407902	0.460248	0.450695	0.38748	1.50658	0.744829	0.715767	0.494384	0.00124043	-1.0163	2.90643	0.475094	0.00111309	-1.07372	2.95347	0.960982	0.605231	-0.0574185	0.218079	1498	168.783	7.50342					1498
547643	Q04756	HGFA	Hepatocyte growth factor activator	4814	3	1.82596	1.46181	1.30502	0.771222	0.728053	0.706517	0.810951	0.785174	0.736365	HGFA	1	0.80057	0.714704	0.422365	0.398723	0.386929	0.444123	0.430006	0.403276	1.53093	0.735264	0.777497	0.480273	0.00689671	-1.05807	2.16136	0.507859	0.00843357	-0.9775	2.07399	1.05744	0.21885	0.0805743	0.659853	655	70.6361	7.23975					655
67461858	O75554	WBP4	WW domain-binding protein 4	6189	2	1.76395	1.84316	1.37249	0.892142	0.729238	0.69071	0.765805	0.765629	0.711591	WBP4	0.957026	1	0.744638	0.484028	0.395645	0.374742	0.415485	0.415389	0.386071	1.65987	0.770696	0.747675	0.464312	0.0049097	-1.10683	2.30895	0.450443	0.00339752	-1.15058	2.46884	0.970129	0.738471	-0.0437518	0.131667	376	42.4809	5.56689					376
85701353	O15347	HMGB3	High mobility group protein B3	6287	4	1.43348	1.48584	1.74608	0.780985	0.744735	0.633568	0.641531	0.766242	0.806294	HMGB3	0.82097	0.850957	1	0.447279	0.426518	0.362852	0.367412	0.438836	0.461774	1.55513	0.719762	0.738022	0.46283	0.00141931	-1.11144	2.84792	0.474572	0.00167351	-1.0753	2.77637	1.02537	0.797368	0.0361432	0.098341	200	22.9654	8.36768					200
123106	P05204	HMGN2	Non-histone chromosomal protein HMG-17	5912	59	1.6047	1.64854	1.49413	0.745547	0.730106	0.696519	0.4977	0.776301	0.738024	HMGN2	0.973403	1	0.906331	0.452246	0.44288	0.422506	0.301903	0.470901	0.447682	1.58246	0.724057	0.670675	0.457553	5.82602e-05	-1.12799	4.23463	0.423819	0.000758919	-1.23848	3.1198	0.926273	0.578432	-0.110491	0.237748	90	9.38706	9.99365					90
313104242	Q9BY42	RTF2	Protein RTF2 homolog	2636	4	1.17796	1.43118	1.76033	0.70645	0.593052	0.625579	0.754039	0.899346	0.936102	RTF2	0.669169	0.813016	1	0.401316	0.336897	0.355375	0.42835	0.510895	0.531775	1.45649	0.641693	0.863162	0.440575	0.00904299	-1.18254	2.04369	0.592631	0.0287729	-0.754794	1.54102	1.34513	0.0271076	0.427747	1.56691	306	33.8652	8.5874					306
218511993	O94964	SOGA1	Protein SOGA1	6425	3	1.37737	1.62891	2.02948	0.918349	0.63976	0.645999	0.716364	0.745415	0.699952	SOGA1	0.67868	0.802622	1	0.452505	0.315233	0.318308	0.352979	0.367294	0.344892	1.67858	0.734702	0.720577	0.437692	0.0110325	-1.19201	1.95733	0.429277	0.00731799	-1.22002	2.13561	0.980774	0.886383	-0.0280079	0.0523786	1423	159.661	6.45557					1423
135834	P06454	PTMA	Prothymosin alpha	4172	44	1.55852	1.55746	1.7759	0.745203	0.715177	0.678291	0.572097	0.689073	0.646567	PTMA	0.877598	0.877	1	0.419621	0.402713	0.381943	0.322145	0.388014	0.364079	1.63063	0.712891	0.635912	0.437188	0.000258374	-1.19367	3.58775	0.38998	0.000243849	-1.35853	3.61288	0.892019	0.121606	-0.164853	0.915044	111	12.196	3.77686					111
74762365	Q6PL18	ATAD2	ATPase family AAA domain-containing protein 2	6344	1	1.31812	1.53178	1.93743	0.715156	0.618587	0.732659	0.666149	0.779223	0.65627	ATAD2	0.680346	0.790626	1	0.369127	0.319283	0.378161	0.343832	0.402194	0.338733	1.59578	0.688801	0.700547	0.43164	0.00803684	-1.2121	2.09491	0.439001	0.00854241	-1.1877	2.06842	1.01705	0.835589	0.0243954	0.0780072	1390	158.456	6.31592					1390
308153671	O43379	WDR62	WD repeat-containing protein 62	3708	1	1.44178	1.60406	1.95025	0.622442	0.804118	0.666662	0.556702	0.600357	0.500714	WDR62	0.739278	0.822493	1	0.319161	0.412316	0.341834	0.285452	0.307836	0.256744	1.66536	0.697741	0.552591	0.418972	0.00373825	-1.25507	2.42733	0.331814	0.00188453	-1.59155	2.7248	0.791972	0.0787423	-0.336479	1.10379	1518	165.849	5.90967					1518
13638437	P08047	SP1	Transcription factor Sp1	3039	2	1.27693	1.48087	1.57901	0.655227	0.479253	0.455089	0.677148	0.827121	0.766556	SP1	0.808691	0.937848	1	0.41496	0.303515	0.288211	0.428843	0.523821	0.485465	1.44561	0.529856	0.756942	0.366529	0.00110069	-1.448	2.95833	0.523615	0.00224928	-0.933421	2.64796	1.42858	0.0414495	0.514581	1.38248	785	80.6436	7.34229					785
12231019	P26358	DNMT1	DNA (cytosine-5)-methyltransferase 1	3675	31	1.26373	1.40789	1.46838	0.813952	0.839203	0.815454	0.772752	0.796948	0.713857	DNMT1	0.860632	0.958808	1	0.55432	0.571516	0.555343	0.526262	0.54274	0.486153	1.38	0.82287	0.761186	0.596281	0.000809999	-0.745936	3.09152	0.551583	0.000700957	-0.858351	3.15431	0.925038	0.0765665	-0.112415	1.11596	1616	183.05	7.75244	AminoAcid metbolism	Cysteine and methionine metabolism	1509		1616
1708239	Q01581	HMCS1	Hydroxymethylglutaryl-CoA synthase, cytoplasmic	4702	8	1.22904	1.38307	1.19894	0.723083	0.723056	0.760691	0.90773	0.879396	0.710612	HMCS1	0.888636	1	0.866867	0.522811	0.522792	0.550003	0.656317	0.63583	0.513795	1.27035	0.73561	0.83258	0.579062	0.000789099	-0.788211	3.10287	0.655395	0.00643511	-0.609564	2.19144	1.13182	0.197414	0.178647	0.704622	520	57.2574	5.41455	Carbohydrate metabolism	Butanoate metabolism	364		520	Metabolic intermediate biosynthesis
29337146	Q9NQB0	TF7L2	Transcription factor 7-like 2	4160	1	1.60115	1.39951	1.20482	0.726606	0.747192	0.80039	0.743387	0.665317	0.635519	TF7L2	1	0.874068	0.752469	0.453802	0.466659	0.499884	0.464283	0.415524	0.396914	1.40183	0.758063	0.681408	0.540767	0.00524029	-0.88692	2.28064	0.486085	0.00374002	-1.04072	2.42713	0.89888	0.120483	-0.153799	0.919074	619	67.8763	8.52881	Cellular Communication	Adherens junction	49		619
6685300	O75508	CLD11	Claudin-11	426	2	1.91747	2.13157	1.31315	0.72987	0.883026	0.833021	0.545007	0.596282	0.490183	CLD11	0.899557	1	0.616049	0.34241	0.414261	0.390802	0.255683	0.279738	0.229963	1.7874	0.815306	0.543824	0.456141	0.0175194	-1.13245	1.75648	0.304255	0.00730423	-1.71665	2.13643	0.667018	0.00759643	-0.584201	2.11939	207	21.9784	7.89893	Cellular Communication	Tight junction	10		207
21263626	Q9NP84	TNR12	Tumor necrosis factor receptor superfamily member 12A	5412	6	1.57894	1.30429	1.23122	0.875071	0.872817	0.91324	0.861834	0.885321	0.869062	TNR12	1	0.826053	0.77978	0.554214	0.552787	0.578388	0.545831	0.560706	0.550409	1.37148	0.887043	0.872072	0.646776	0.0104817	-0.628662	1.97957	0.635861	0.00925363	-0.653218	2.03369	0.983123	0.37015	-0.0245556	0.431623	129	13.9022	8.95361	ECM	receptor	55		129
239938818	P30530	UFO	Tyrosine-protein kinase receptor UFO	6316	11	1.34754	1.31952	1.29722	0.804491	0.883596	0.837069	0.867972	0.814624	0.821653	UFO	1	0.979212	0.962661	0.597009	0.655713	0.621185	0.644118	0.604529	0.609745	1.32143	0.841719	0.83475	0.636977	6.05333e-05	-0.650686	4.21801	0.631704	2.55262e-05	-0.66268	4.59301	0.991721	0.818275	-0.0119943	0.0871009	894	98.273	5.42725	ECM	enzyme	34		894
113936	P01008	ANT3	Antithrombin-III	4888	4	1.53321	1.64752	1.4774	0.947816	1.0207	0.877364	1.02029	0.599812	0.635493	ANT3	0.93062	1	0.896744	0.575299	0.619537	0.532537	0.619287	0.36407	0.385727	1.55271	0.948627	0.751864	0.610948	0.000743707	-0.710879	3.1286	0.484226	0.00506928	-1.04625	2.29505	0.792582	0.234867	-0.335368	0.629178	464	52.5689	6.7124	ECM	protease inhibitor	10		464
519668687	P23229	ITA6	Integrin alpha-6	1752	23	1.3137	1.57816	1.68877	0.822093	0.887062	0.803338	0.647582	0.631597	0.607502	ITA6	0.777902	0.934501	1	0.4868	0.525271	0.475694	0.383463	0.373998	0.359731	1.52688	0.837498	0.628894	0.548504	0.00378766	-0.866425	2.42163	0.411883	0.00130734	-1.27969	2.88361	0.75092	0.00171384	-0.413268	2.76603	1130	126.526	6.60986	ECM	receptor	30		1130
308153582	Q8IVL1	NAV2	Neuron navigator 2	4258	1	1.6519	1.8522	2.28205	0.655462	0.706979	0.715844	0.691462	0.398946	0.267896	NAV2	0.723864	0.811636	1	0.287225	0.309799	0.313684	0.303	0.174819	0.117393	1.92872	0.692762	0.452768	0.359183	0.00270771	-1.47721	2.5674	0.234751	0.00275309	-2.0908	2.56018	0.65357	0.130904	-0.613587	0.883048	2488	268.003	9.02686	ECM	regulator	69		2488
68067956	P05362	ICAM1	Intercellular adhesion molecule 1	3159	70	0.7201	0.633774	0.561364	1.17802	1.31146	1.31835	1.02241	1.10424	1.16089	ICAM1	0.546214	0.480734	0.425809	0.893559	0.994779	1	0.775521	0.837591	0.880568	0.638413	1.26928	1.09585	1.98818	0.000621092	0.991447	3.20684	1.71652	0.00169179	0.779483	2.77165	0.863361	0.04637	-0.211964	1.33376	532	57.789	7.98682	NFKappaB	adhesion	4618		532
23831297	Q9UIJ7	KAD3	GTP:AMP phosphotransferase AK3, mitochondrial	2313	73	0.703463	0.584816	0.483345	1.21535	1.41231	1.34987	0.927408	1.0576	1.10058	KAD3	0.498093	0.414084	0.342236	0.860536	1	0.955784	0.656659	0.748842	0.779277	0.590541	1.32584	1.02853	2.24513	0.00103448	1.1668	2.98528	1.74167	0.00597104	0.800475	2.22395	0.775756	0.0189313	-0.366325	1.72282	227	25.5495	9.15869	NucleotideMetabolism	Purine metabolism	1295		227
74733620	Q9H6Y7	RN167	E3 ubiquitin-protein ligase RNF167	6371	2	0.701426	0.646453	0.757175	1.09293	1.10034	1.13448	1.34259	0.952503	0.954221	RN167	0.522441	0.481495	0.563964	0.814044	0.819564	0.84499	1	0.70945	0.710729	0.701685	1.10925	1.08311	1.58084	0.000291509	0.66069	3.53535	1.54358	0.0461883	0.62628	1.33547	0.976431	0.850848	-0.0344103	0.0701479	350	38.2744	5.63037	Ubiquitination	E3	5563		350	Protein modification
27151704	Q9Y6N5	SQRD	Sulfide:quinone oxidoreductase, mitochondrial	4917	88	0.708144	0.643018	0.523351	1.1303	1.20526	1.1901	0.999808	1.11012	1.17993	SQRD	0.587547	0.533511	0.434223	0.93781	1	0.987429	0.82954	0.921064	0.978986	0.624838	1.17522	1.09662	1.88084	0.000723299	0.911379	3.14068	1.75505	0.00331928	0.811508	2.47896	0.933117	0.241413	-0.0998705	0.617239	450	49.9289	9.11475	Energy metabolism	Sulfur metabolism	591		450
2506481	P30411	BKRB2	B2 bradykinin receptor	5098	1	0.747364	0.661384	0.545585	1.20715	1.03308	1.0334	1.07717	0.944122	0.987817	BKRB2	0.619112	0.547887	0.45196	1	0.855794	0.856062	0.892323	0.782106	0.818302	0.651444	1.09121	1.00304	1.67506	0.00591958	0.744214	2.22771	1.53971	0.00750646	0.62266	2.12457	0.919197	0.276041	-0.121553	0.559027	391	44.4309	8.1333	Excretory metabolism	Endocrine and other factor-regulated calcium reabsorption	2507		391
544152	P37059	DHB2	Estradiol 17-beta-dehydrogenase 2	3049	9	0.465737	0.45055	0.391407	0.895055	0.845995	0.898939	1.06085	1.62177	1.61889	DHB2	0.287178	0.277813	0.241345	0.551899	0.521648	0.554294	0.654129	1	0.998223	0.435898	0.879996	1.43384	2.01881	9.71462e-05	1.01351	4.01257	3.28939	0.00603852	1.71782	2.21907	1.62937	0.0416616	0.704313	1.38026	387	42.757	8.49951	lipid metabolism	Steroid hormone biosynthesis	740		387
254763392	P24557	THAS	Thromboxane-A synthase	5359	10	0.633665	0.673625	0.634028	1.1917	1.02786	1.08515	1.15774	1.21145	1.11271	THAS	0.523063	0.556048	0.523362	0.983695	0.848457	0.895749	0.955666	1	0.918493	0.647106	1.10157	1.16063	1.70231	0.000799946	0.76749	3.09694	1.79358	8.2551e-05	0.842839	4.08328	1.05362	0.349884	0.075349	0.456076	533	60.4791	7.62061	lipid metabolism	Arachidonic acid metabolism	1037		533
727863589	A8MYA2	CX049	Uncharacterized protein CXorf49	2264	1	0.517901	0.473901	0.49168	1.80507	1.75103	1.52542	1.27067	0.684649	0.909845	CX049	0.286914	0.262538	0.272388	1	0.970061	0.845075	0.703943	0.379292	0.504049	0.494494	1.69384	0.955054	3.42541	0.000157513	1.77628	3.80268	1.93138	0.0546034	0.949631	1.26278	0.563839	0.0180102	-0.826645	1.74448	514	54.3832	9.02686					514
55583953	Q8N3L3	TXLNB	Beta-taxilin	449	4	0.6541	0.560878	0.584881	1.44747	1.97667	1.79472	1.07372	0.858941	0.895319	TXLNB	0.330911	0.283749	0.295893	0.73228	1	0.907951	0.543199	0.43454	0.452944	0.599953	1.73962	0.942661	2.89959	0.00194592	1.53585	2.71088	1.57122	0.00891106	0.65189	2.05007	0.541878	0.00916675	-0.88396	2.03778	684	76.4719	4.93213					684
347595775	Q8IUR5	TMTC1	Transmembrane and TPR repeat-containing protein 1	6412	1	0.660594	0.465687	0.377396	1.50176	1.33868	1.32289	1.0598	1.397	1.81729	TMTC1	0.363506	0.256254	0.20767	0.826377	0.73664	0.727949	0.583178	0.768727	1	0.501226	1.38778	1.42469	2.76877	0.000940574	1.46925	3.02661	2.84242	0.0169959	1.50712	1.76966	1.0266	0.878405	0.0378745	0.0563053	882	98.7832	8.83643					882
109940186	Q9BTV7	CABL2	CDK5 and ABL1 enzyme substrate 2	5499	1	0.487755	0.432008	0.443667	1.22357	1.46086	0.977453	1.3984	0.609773	0.881688	CABL2	0.333881	0.295721	0.303702	0.837567	1	0.669092	0.95724	0.417406	0.603539	0.454476	1.22063	0.963286	2.68579	0.00550743	1.42535	2.25905	2.11955	0.0932705	1.08376	1.03026	0.789172	0.394701	-0.341589	0.403732	478	52.2025	9.81787					478
209572611	Q9H329	E41LB	Band 4.1-like protein 4B	4473	1	0.583831	0.643186	0.474922	1.24963	1.77939	1.28664	0.786169	0.944658	1.34879	E41LB	0.328107	0.361464	0.266901	0.702277	1	0.723076	0.441819	0.530888	0.758005	0.567313	1.43855	1.02654	2.53573	0.00803082	1.3424	2.09524	1.80947	0.0581686	0.85557	1.23531	0.713591	0.160073	-0.48683	0.795681	900	99.65	9.0415					900
119543	P24390	ERD21	ER lumen protein-retaining receptor 1	2458	5	0.716725	0.612787	0.577304	1.57401	1.41029	1.74997	1.24589	0.92153	0.81973	ERD21	0.409563	0.350169	0.329893	0.899448	0.805891	1	0.711947	0.526597	0.468424	0.635605	1.57809	0.995716	2.48282	0.000904416	1.31198	3.04363	1.56656	0.0561023	0.647604	1.25102	0.630962	0.0227026	-0.664374	1.64392	212	24.526	8.6167					212
114823	P27105	STOM	Erythrocyte band 7 integral membrane protein	1759	143	0.680018	0.604893	0.588557	1.33737	1.36013	1.40148	1.13347	0.937863	0.98116	STOM	0.485214	0.43161	0.419954	0.954259	0.970495	1	0.808766	0.669195	0.700089	0.624489	1.36633	1.0175	2.18791	2.56242e-05	1.12956	4.59135	1.62933	0.00391789	0.704277	2.40695	0.744695	0.00497001	-0.425278	2.30364	288	31.7107	7.88428					288		INTRAMEM
231381	P30460	1B08	HLA class I histocompatibility antigen, B-8 alpha chain	6548	37	0.680603	0.570463	0.464439	1.14484	1.20422	1.18809	0.992052	1.18167	1.34549	1B08	0.505841	0.423982	0.345182	0.850873	0.89501	0.88302	0.737318	0.878248	1	0.571835	1.17905	1.17307	2.06187	0.000725649	1.04396	3.13927	2.05141	0.00736554	1.03662	2.1328	0.994927	0.956746	-0.00733775	0.0192032	362	40.3058	5.70654					362
77416865	P28799	GRN	Granulins	5574	56	0.737408	0.589511	0.488752	1.30258	1.17281	1.2491	1.38003	0.95441	1.02432	GRN	0.534344	0.427174	0.354161	0.943881	0.849847	0.905127	1	0.691588	0.742249	0.605224	1.2415	1.11959	2.0513	0.00144832	1.03654	2.83914	1.84987	0.0267041	0.887425	1.57342	0.901804	0.423976	-0.149115	0.372658	593	63.4998	6.82959					593
115311617	Q9UHG3	PCYOX	Prenylcysteine oxidase 1	5283	82	0.695462	0.633527	0.549921	1.21641	1.32145	1.25992	1.38694	0.944948	0.982913	PCYOX	0.501435	0.456779	0.396498	0.877045	0.952775	0.908413	1	0.681316	0.708689	0.626303	1.26593	1.10494	2.02127	0.000251409	1.01526	3.59962	1.76422	0.0315799	0.819028	1.50059	0.872827	0.328167	-0.196232	0.483905	505	56.6037	6.17627					505
20138852	Q9BQT8	ODC	Mitochondrial 2-oxodicarboxylate carrier	3857	1	0.739767	0.578044	0.485619	1.19944	1.25399	1.18961	1.16018	0.818314	0.990777	ODC	0.589929	0.460963	0.387259	0.956499	1	0.948656	0.925191	0.652568	0.790098	0.601143	1.21435	0.989758	2.02006	0.00134181	1.0144	2.87231	1.64646	0.0346364	0.719367	1.46047	0.815054	0.0895858	-0.295033	1.04776	299	33.2816	9.51025					299
74734243	Q9HAT2	SIAE	Sialate O-acetylesterase	4005	16	0.721688	0.638303	0.526858	1.18855	1.35301	1.22865	1.21253	1.03228	1.0342	SIAE	0.533394	0.471764	0.389396	0.878444	1	0.908088	0.896167	0.762953	0.764368	0.62895	1.25674	1.093	1.99815	0.00111837	0.998667	2.95141	1.73782	0.00484809	0.797281	2.31443	0.869715	0.102517	-0.201386	0.989204	523	58.2771	7.32764					523
74751749	Q96AQ6	PBIP1	Pre-B-cell leukemia transcription factor-interacting protein 1	2227	65	0.733053	0.657478	0.559036	1.25295	1.27498	1.25183	1.17896	1.06036	1.05415	PBIP1	0.574951	0.515676	0.438466	0.982722	1	0.98184	0.924689	0.831663	0.826792	0.649856	1.25992	1.09782	1.93877	0.000278573	0.955143	3.55506	1.68933	0.00228504	0.756452	2.64111	0.871341	0.0171806	-0.198691	1.76496	731	80.5941	5.32568					731
74731355	Q96CM4	NXNL1	Nucleoredoxin-like protein 1	6422	2	0.605972	0.714617	0.511845	1.14886	1.1331	1.26711	1.59581	0.882465	1.16863	NXNL1	0.379727	0.447809	0.320743	0.719923	0.710045	0.794023	1	0.552989	0.732313	0.610811	1.18302	1.21564	1.9368	0.00137582	0.953678	2.86144	1.9902	0.0484085	0.992911	1.31508	1.02757	0.884936	0.0392338	0.0530882	212	23.9281	4.84326					212
313104269	O75762	TRPA1	Transient receptor potential cation channel subfamily A member 1	4013	35	0.701842	0.674262	0.571031	1.26697	1.24542	1.23578	0.84362	1.11331	1.16252	TRPA1	0.553955	0.532186	0.450707	1	0.982992	0.97538	0.665858	0.878718	0.91756	0.649045	1.24939	1.03982	1.92496	0.00012493	0.944829	3.90333	1.60207	0.0216125	0.679936	1.66529	0.83226	0.103045	-0.264894	0.986975	1119	127.418	7.12256					1119		INTRAMEM
6685974	O43760	SNG2	Synaptogyrin-2	6151	3	0.737517	0.628643	0.641826	1.18342	1.20933	1.3158	1.44933	0.986376	1.10175	SNG2	0.508868	0.433748	0.442844	0.816527	0.834404	0.90787	1	0.680574	0.760176	0.669329	1.23618	1.17915	1.8469	0.000435594	0.885104	3.36092	1.76169	0.023635	0.816961	1.62644	0.953865	0.71398	-0.0681437	0.146314	224	24.7941	4.94482					224
23396822	Q9NPJ3	ACO13	Acyl-coenzyme A thioesterase 13	3460	13	0.798415	0.672534	0.623615	1.18705	1.32539	1.28913	0.926476	1.14413	1.1136	ACO13	0.6024	0.507423	0.470514	0.895619	1	0.97264	0.699021	0.863236	0.840207	0.698188	1.26719	1.0614	1.81497	0.00102603	0.859943	2.98884	1.52022	0.0132678	0.604283	1.8772	0.837604	0.0610931	-0.25566	1.21401	140	14.9509	9.14404					140
74750799	Q8IZV5	RDH10	Retinol dehydrogenase 10	1895	8	0.74873	0.649551	0.532141	1.15901	1.1843	1.15985	1.10829	1.03775	1.05917	RDH10	0.632215	0.54847	0.449331	0.978649	1	0.979361	0.935826	0.876258	0.894344	0.643474	1.16772	1.0684	1.81471	0.0011494	0.85974	2.93953	1.66037	0.00299212	0.731503	2.52402	0.914949	0.0115081	-0.128237	1.939	341	38.0624	7.40088					341	Cofactor metabolism
298286841	Q8NBM8	PCYXL	Prenylcysteine oxidase-like	2506	1	0.733985	0.75676	0.65395	1.22329	1.25073	1.30425	1.10715	1.16945	1.04624	PCYXL	0.562762	0.580224	0.501397	0.937919	0.958964	1	0.848879	0.896641	0.802177	0.714898	1.25942	1.10761	1.76168	0.000155822	0.816955	3.80737	1.54933	0.00114882	0.631647	2.93975	0.879461	0.0238299	-0.185308	1.62288	494	54.6119	7.31299					494
74735298	Q9Y646	CBPQ	Carboxypeptidase Q	4726	12	0.771372	0.651909	0.620098	1.13135	1.19981	1.24077	1.19865	0.972947	1.06759	CBPQ	0.621689	0.525408	0.499769	0.911813	0.966987	1	0.966053	0.784148	0.860424	0.681126	1.19064	1.07973	1.74805	0.0008108	0.805745	3.09109	1.58521	0.0075887	0.664672	2.11983	0.906845	0.202321	-0.141073	0.69396	472	51.8545	6.17627					472
14548183	Q9NXJ5	PGPI	Pyroglutamyl-peptidase 1	391	1	0.467515	0.511614	0.6641	1.116	0.855783	0.878224	1.58311	1.5612	1.47986	PGPI	0.295315	0.323171	0.419491	0.704942	0.540572	0.554747	1	0.986164	0.934781	0.547743	0.950002	1.54139	1.73439	0.0171051	0.794432	1.76687	2.81408	0.00012271	1.49266	3.91112	1.62251	0.00266043	0.69823	2.57505	209	23.1235	5.89697					209
135922	P28289	TMOD1	Tropomodulin-1	5406	11	0.74737	0.603931	0.562928	1.0767	1.09049	1.04172	1.85278	1.03228	1.11713	TMOD1	0.403377	0.325959	0.303829	0.581124	0.588567	0.562244	1	0.55715	0.602949	0.638076	1.06963	1.33406	1.67634	0.00171615	0.745314	2.76544	2.09076	0.0592883	1.06403	1.22703	1.24722	0.368158	0.318712	0.433965	359	40.5439	5.09717					359
74751775	Q96BM9	ARL8A	ADP-ribosylation factor-like protein 8A	6127	27	0.778241	0.684274	0.617752	1.07239	1.21657	1.18483	1.59161	1.07114	1.04087	ARL8A	0.488964	0.429925	0.388129	0.673773	0.76436	0.744418	1	0.672991	0.653974	0.693423	1.15793	1.23454	1.66987	0.00190004	0.739736	2.72124	1.78036	0.0428336	0.83217	1.36822	1.06617	0.698526	0.0924343	0.155817	186	21.402	7.76709					186		INTRAMEM
224471847	Q8NHP8	PLBL2	Putative phospholipase B-like 2	6044	52	0.795273	0.724212	0.643849	1.158	1.23686	1.2099	1.47551	0.940616	0.919906	PLBL2	0.538982	0.490822	0.436357	0.784812	0.838259	0.819986	1	0.637485	0.62345	0.721111	1.20159	1.11201	1.6663	0.000629853	0.736645	3.20076	1.54208	0.104832	0.624876	0.979504	0.925453	0.650678	-0.111768	0.186634	589	65.43	6.80029					589
74733566	Q9H2V7	SPNS1	Protein spinster homolog 1	6103	4	0.766952	0.704407	0.652082	1.13976	1.22752	1.12511	1.36559	0.909561	1.03386	SPNS1	0.561626	0.515825	0.477509	0.834624	0.898891	0.823901	1	0.666056	0.757077	0.707814	1.16413	1.103	1.64468	0.000584516	0.717809	3.2332	1.55833	0.047791	0.639996	1.32065	0.947493	0.684543	-0.077813	0.164599	528	56.5937	6.63916					528
21542266	Q9NS93	TM7S3	Transmembrane 7 superfamily member 3	6035	7	0.719633	0.81106	0.717569	1.18739	1.21612	1.25357	1.43324	0.959606	1.042	TM7S3	0.502102	0.565893	0.500662	0.828465	0.848514	0.874642	1	0.669536	0.727025	0.749421	1.21903	1.14495	1.62663	0.000205826	0.701884	3.6865	1.52778	0.0570405	0.611436	1.24382	0.939231	0.641554	-0.0904484	0.192767	570	64.1252	7.00537					570
143955289	Q9NWR8	MCUB	Calcium uniporter regulatory subunit MCUb, mitochondrial	6613	1	0.724422	0.729198	0.658687	1.23352	1.016	1.08475	1.08349	1.11638	1.13739	MCUB	0.58728	0.591151	0.533989	1	0.823661	0.879392	0.878371	0.905038	0.922071	0.704102	1.11142	1.11242	1.5785	0.0039284	0.658553	2.40578	1.57992	0.000122103	0.659848	3.91328	1.0009	0.988674	0.00129484	0.00494687	336	39.0574	9.15869					336
121940586	Q17RN3	FA98C	Protein FAM98C	3274	1	0.624385	0.631644	0.700483	1.06018	1.03369	0.973718	1.09968	1.37489	1.31874	FA98C	0.454135	0.459415	0.509483	0.7711	0.751834	0.708215	0.799829	1	0.959163	0.652171	1.02253	1.26444	1.56788	0.000463591	0.648819	3.33386	1.93881	0.00218499	0.955173	2.66055	1.23658	0.0510474	0.306354	1.29203	349	37.3053	7.18115					349
251757344	O95425	SVIL	Supervillin	6296	99	0.738253	0.751866	0.680476	1.18563	1.05404	1.07948	1.05175	1.14878	1.16087	SVIL	0.622668	0.63415	0.573937	1	0.889014	0.910475	0.887086	0.968921	0.979121	0.723532	1.10638	1.12047	1.52914	0.00112501	0.612725	2.94884	1.54861	0.000630059	0.630975	3.20062	1.01273	0.803821	0.0182502	0.0948409	2214	247.593	6.97607					2214
116242759	P98171	RHG04	Rho GTPase-activating protein 4	5274	3	0.741323	0.715576	0.5959	0.962891	1.10799	1.04522	1.9405	1.0325	1.12468	RHG04	0.382027	0.368759	0.307086	0.496208	0.570982	0.538636	1	0.532082	0.579585	0.684267	1.0387	1.3659	1.51798	0.00447676	0.60215	2.34904	1.99615	0.0798636	0.997217	1.09765	1.315	0.324598	0.395067	0.488655	946	104.96	6.34131					946
119369490	Q6QEF8	CORO6	Coronin-6	5749	4	0.676043	0.675889	0.686405	1.00786	0.972044	1.11254	1.9073	0.974139	0.924265	CORO6	0.35445	0.354369	0.359882	0.528424	0.509643	0.583307	1	0.510741	0.484593	0.679446	1.03082	1.26857	1.51714	0.00114655	0.601359	2.94061	1.86707	0.139165	0.900772	0.856469	1.23064	0.501845	0.299413	0.299431	472	52.7288	5.96045					472
259016335	Q8N9F0	NAT8L	N-acetylaspartate synthetase	373	2	0.418798	0.368847	0.346703	2.53905	2.2311	2.31504	0.845549	0.468043	0.451911	NAT8L	0.164943	0.14527	0.136548	1	0.878714	0.911775	0.333018	0.184338	0.177984	0.378116	2.36173	0.588501	6.24604	3.0256e-05	2.64294	4.51919	1.5564	0.181863	0.638215	0.740255	0.249182	0.000359654	-2.00473	3.44412	302	32.816	8.82178	AminoAcid metbolism	Alanine, aspartate and glutamate metabolism	1433		302
50400409	Q7RTV2	GSTA5	Glutathione S-transferase A5	5456	1	0.767104	0.516626	0.536757	1.30286	1.25181	1.17222	1.41656	0.867528	0.915835	GSTA5	0.541527	0.364705	0.378916	0.919738	0.883701	0.827511	1	0.61242	0.646521	0.606829	1.2423	1.06664	2.0472	0.0020253	1.03365	2.69351	1.75773	0.0758188	0.813712	1.12022	0.858603	0.383389	-0.219937	0.416361	222	25.7056	8.03076	AminoAcid metbolism	Glutathione metabolism	1771		222
74761957	Q9UHQ9	NB5R1	NADH-cytochrome b5 reductase 1	2808	34	0.70583	0.684858	0.594045	1.21034	1.4105	1.33807	1.17098	1.00627	1.00046	NB5R1	0.500413	0.485544	0.42116	0.858093	1	0.94865	0.83019	0.713416	0.709297	0.661578	1.31963	1.05924	1.99468	0.000631759	0.996155	3.19945	1.60108	0.00373581	0.679043	2.42761	0.802675	0.0323437	-0.317112	1.49021	305	34.0732	9.37842	Carbohydrate metabolism	Amino sugar and nucleotide sugar metabolism	220		305
113596	P15121	ALDR	Aldose reductase	381	128	0.404565	0.444179	0.543015	1.12463	0.716159	0.830332	1.51692	1.48425	1.58984	ALDR	0.25447	0.279387	0.341555	0.707389	0.450461	0.522276	0.954138	0.933589	1	0.46392	0.890374	1.53034	1.91924	0.0293808	0.940536	1.53194	3.29871	3.25311e-05	1.7219	4.4877	1.71876	0.00700899	0.781365	2.15434	316	35.8305	6.97607	Carbohydrate metabolism	Pentose and glucuronate interconversions	86		316
134665	P04179	SODM	Superoxide dismutase [Mn], mitochondrial	2578	75	0.668347	0.556154	0.482407	1.25977	1.56449	1.39693	1.15659	0.966722	0.948685	SODM	0.427198	0.355486	0.308348	0.805227	1	0.892901	0.739275	0.617915	0.606387	0.568969	1.40706	1.024	2.47301	0.00125827	1.30627	2.90023	1.79974	0.0060477	0.84779	2.21841	0.727755	0.0255797	-0.458475	1.5921	222	24.7066	8.25049	cellProcess	Peroxisome	74		222
317373539	P30044	PRDX5	Peroxiredoxin-5, mitochondrial	3578	61	0.731643	0.688342	0.727483	1.07562	1.06803	1.11241	1.13433	1.10795	1.14864	PRDX5	0.636964	0.599266	0.633342	0.936429	0.929823	0.968456	0.98754	0.964575	1	0.715823	1.08535	1.13031	1.51623	4.51422e-05	0.600493	4.34542	1.57903	2.2156e-05	0.659041	4.65451	1.04142	0.0685551	0.0585485	1.16396	214	22.0725	8.70459	cellProcess	Peroxisome	72		214
325511382	Q15413	RYR3	Ryanodine receptor 3	5496	1	0.58686	0.434117	0.620039	1.02541	1.01525	1.10346	2.10214	1.0336	1.0315	RYR3	0.279173	0.206512	0.294957	0.487796	0.482962	0.524923	1	0.491688	0.49069	0.547006	1.04804	1.38908	1.91596	0.00140958	0.938068	2.85091	2.53942	0.0800787	1.3445	1.09648	1.3254	0.394272	0.40643	0.404204	4870	551.688	5.68115	Digestive_metabolism	Salivary secretion	1844		4870		INTRAMEM
1172047	P42785	PCP	Lysosomal Pro-X carboxypeptidase	6273	23	0.777611	0.651503	0.548895	1.15988	1.19251	1.21524	1.53084	0.914521	0.954854	PCP	0.507963	0.425586	0.358558	0.757673	0.778993	0.793838	1	0.597398	0.623745	0.659336	1.18921	1.1334	1.80365	0.00146829	0.850916	2.83319	1.71901	0.0866741	0.781577	1.06211	0.953075	0.793767	-0.0693389	0.100307	496	55.7639	7.21045	Digestive_metabolism	Protein digestion and absorption	2218		496
62512173	Q13555	KCC2G	Calcium/calmodulin-dependent protein kinase type II subunit gamma	5806	24	0.715183	0.738151	0.733463	1.1689	1.15487	1.18714	1.2537	1.01585	1.09521	KCC2G	0.570456	0.588776	0.585036	0.932357	0.921166	0.946906	1	0.810279	0.873582	0.728932	1.1703	1.12159	1.6055	2.92613e-06	0.683025	5.53371	1.53867	0.00503101	0.621688	2.29835	0.958375	0.527803	-0.0613378	0.277528	558	62.5697	7.82568	Digestive_metabolism	Gastric acid secretion	1919		558
120523	P02792	FRIL	Ferritin light chain	6502	20	0.826629	0.683642	0.637065	1.19751	1.17263	1.07388	2.0443	0.714161	0.809352	FRIL	0.404357	0.334413	0.311629	0.585778	0.573607	0.525301	1	0.349342	0.395906	0.715779	1.148	1.18927	1.60385	0.00320781	0.681541	2.49379	1.66151	0.334792	0.732494	0.475225	1.03595	0.928167	0.0509523	0.032374	175	20.0071	5.78271	Digestive_metabolism	Mineral absorption	2362		175
46397333	P60709	ACTB	Actin, cytoplasmic 1	1	4928	0.911403	0.868529	0.913064	0.961605	1.06568	0.977509	1.15862	1.01133	1.05408	ACTB	0.786629	0.749625	0.788063	0.829958	0.919789	0.843686	1	0.87288	0.909771	0.897665	1.0016	1.07468	1.11578	0.0429115	0.158056	1.36743	1.19719	0.0184787	0.259653	1.73333	1.07296	0.250467	0.101596	0.60125	375	41.7097	5.47803	Housekeeping	actin	1		375
51316972	P62736	ACTA	Actin, aortic smooth muscle	2	3852	0.890418	0.848644	0.820968	0.996519	1.11137	1.04486	1.3106	0.978075	0.997311	ACTA	0.679397	0.647523	0.626406	0.760353	0.847986	0.79724	1	0.746279	0.760957	0.853343	1.05092	1.09533	1.23153	0.00710778	0.300452	2.14827	1.28357	0.0919505	0.360166	1.03645	1.04226	0.713888	0.0597141	0.14637	377	41.9818	5.38916	Housekeeping	actin	3		377
61218043	P68133	ACTS	Actin, alpha skeletal muscle	3	3814	0.928795	0.87248	0.993371	1.03066	1.13626	1.07524	1.06647	0.934034	0.98283	ACTS	0.817411	0.767849	0.874243	0.907061	1	0.946292	0.938574	0.822022	0.864966	0.931548	1.08072	0.994444	1.16013	0.0325209	0.214292	1.48784	1.06752	0.293905	0.0942592	0.531793	0.920167	0.155113	-0.120033	0.809351	377	42.0239	5.38916	Housekeeping	Arp2/3 complex	6		377
88984001	Q92747	ARC1A	Actin-related protein 2/3 complex subunit 1A	4	22	0.90696	0.956378	1.01956	0.884094	0.850008	0.879934	1.19157	1.07411	1.0718	ARC1A	0.761144	0.802617	0.855639	0.741955	0.713349	0.738463	1	0.901423	0.899483	0.960965	0.871345	1.1125	0.90674	0.0592823	-0.14124	1.22708	1.15769	0.0416681	0.211244	1.3802	1.27676	0.00416715	0.352483	2.38016	370	41.5427	8.17725	Housekeeping	Arp2/3 complex	7		370
3121763	O15143	ARC1B	Actin-related protein 2/3 complex subunit 1B	5	58	0.925117	0.920885	1.05226	0.982675	0.870242	0.89521	1.08368	1.01602	1.11112	ARC1B	0.832601	0.828792	0.947027	0.884403	0.783214	0.805685	0.975309	0.914413	1	0.966087	0.916042	1.07027	0.948199	0.413978	-0.0767385	0.383023	1.10784	0.113312	0.147754	0.945724	1.16837	0.0252765	0.224493	1.59728	372	40.9234	8.35303	Housekeeping	Arp2/3 complex	8		372
47117648	P61160	ARP2	Actin-related protein 2	6	146	0.894991	0.906498	1.01787	0.947984	0.858808	0.88052	1.12671	1.07131	1.12954	ARP2	0.792348	0.802535	0.901137	0.839263	0.760314	0.779536	0.99749	0.948447	1	0.939788	0.895771	1.10919	0.953163	0.406543	-0.0692054	0.390894	1.18025	0.0176643	0.239097	1.7529	1.23825	0.00290052	0.308303	2.53752	394	44.7322	6.7417	Housekeeping	Arp2/3 complex	9		394
47117647	P61158	ARP3	Actin-related protein 3	7	161	0.893075	0.911795	1.05915	0.933892	0.860605	0.878685	1.07352	1.08248	1.15318	ARP3	0.774443	0.790676	0.918455	0.809838	0.746285	0.761964	0.930914	0.938686	1	0.954673	0.891061	1.10306	0.933368	0.326599	-0.0994827	0.485985	1.15543	0.0634724	0.208432	1.19741	1.23792	0.00318307	0.307915	2.49715	418	47.341	5.88428	Housekeeping	Arp2/3 complex	10		418
3121764	O15144	ARPC2	Actin-related protein 2/3 complex subunit 2	8	84	0.92194	0.907919	1.0464	0.880842	0.85072	0.826216	1.13557	1.10679	1.1043	ARPC2	0.811873	0.799526	0.921472	0.775682	0.749156	0.727577	1	0.974653	0.972461	0.958752	0.852593	1.11555	0.889274	0.0856927	-0.169301	1.06706	1.16355	0.025497	0.218529	1.59351	1.30842	0.000148873	0.38783	3.82719	300	34.3115	7.35693	Housekeeping	Arp2/3 complex	11		300
3121765	O15145	ARPC3	Actin-related protein 2/3 complex subunit 3	9	29	0.903046	0.880215	1.08354	0.923367	0.843475	0.829999	1.13081	1.14052	1.11122	ARPC3	0.791782	0.771763	0.95004	0.809598	0.73955	0.727734	0.991486	1	0.974302	0.955602	0.865614	1.12752	0.905831	0.27147	-0.142686	0.566278	1.1799	0.0570075	0.23867	1.24407	1.30257	0.000995994	0.381356	3.00174	178	20.5334	8.5874	Housekeeping	Arp2/3 complex	12		178
38372625	P59998	ARPC4	Actin-related protein 2/3 complex subunit 4	10	58	0.891867	0.886176	1.02487	0.934471	0.866785	0.869771	1.09854	1.10059	1.12521	ARPC4	0.792624	0.787566	0.910826	0.830487	0.770333	0.772986	0.976303	0.978121	1	0.934304	0.890342	1.10811	0.952947	0.432349	-0.0695324	0.364166	1.18603	0.0196207	0.246143	1.70729	1.24459	0.000777208	0.315675	3.10946	168	19.6543	8.42627	Housekeeping	Arp2/3 complex	13		168
3121767	O15511	ARPC5	Actin-related protein 2/3 complex subunit 5	11	42	0.891632	0.901282	1.03195	0.882048	0.88027	0.843452	1.14688	1.11241	1.12057	ARPC5	0.777445	0.785859	0.899792	0.769088	0.767537	0.735435	1	0.969948	0.977064	0.941621	0.86859	1.12662	0.922441	0.194925	-0.116472	0.710132	1.19647	0.0163399	0.258781	1.78675	1.29707	9.35305e-05	0.375252	4.02905	151	16.3103	5.66846	Housekeeping	Actin-Arp2/3 complex(14)	14		151
125969	P08865	RSSA	40S ribosomal protein SA	12	66	1.04709	1.05585	1.22031	0.888431	0.870238	0.841006	0.896667	0.9878	0.985157	RSSA	0.858048	0.865233	1	0.728036	0.713128	0.689173	0.734785	0.809466	0.807299	1.10775	0.866558	0.956541	0.782268	0.0141676	-0.354264	1.8487	0.863499	0.0768239	-0.211734	1.1145	1.10384	0.0525256	0.142531	1.27963	295	32.8334	4.86865	Housekeeping	40S	1		295
1710756	P15880	RS2	40S ribosomal protein S2	13	117	1.09242	1.12331	1.26334	0.866179	0.849167	0.803309	0.886141	0.98149	0.978989	RS2	0.864708	0.889162	1	0.685626	0.67216	0.635861	0.701427	0.776901	0.774921	1.15969	0.839552	0.948873	0.723944	0.0045832	-0.466051	2.33883	0.818212	0.0262263	-0.289454	1.58126	1.13021	0.0403403	0.176597	1.39426	293	31.3046	10.2427	Housekeeping	40S	2		293
417719	P23396	RS3	40S ribosomal protein S3	14	158	1.07156	1.1271	1.25441	0.897006	0.842427	0.847669	0.895846	0.980876	0.978183	RS3	0.854233	0.898513	1	0.715081	0.671572	0.675751	0.714157	0.781941	0.779795	1.15103	0.862367	0.951635	0.749217	0.00709139	-0.416545	2.14927	0.826772	0.0306612	-0.274439	1.51341	1.10351	0.0532544	0.142106	1.27364	243	26.6714	9.65674	Housekeeping	40S	3		243
47117764	P61247	RS3A	40S ribosomal protein S3a	15	150	1.05995	1.10831	1.27044	0.905193	0.853363	0.816472	0.909009	0.983168	0.99591	RS3A	0.834319	0.872381	1	0.712505	0.671708	0.64267	0.715509	0.773882	0.783911	1.14623	0.858343	0.962696	0.748839	0.0137718	-0.417272	1.86101	0.839879	0.056801	-0.251746	1.24564	1.12158	0.0491755	0.165526	1.30825	264	29.9257	9.72998	Housekeeping	40S	4		264
50403628	P62701	RS4X	40S ribosomal protein S4, X isoform	16	123	1.07444	1.11153	1.24074	0.895184	0.880884	0.837476	0.897976	0.982416	1.01478	RS4X	0.865967	0.895866	1	0.721494	0.709968	0.674983	0.723744	0.7918	0.817885	1.14224	0.871182	0.965058	0.762698	0.00705575	-0.390816	2.15146	0.844884	0.0444588	-0.243174	1.35204	1.10776	0.073303	0.147642	1.13488	263	29.5791	10.1548	Housekeeping	40S	5		263
22002064	P46782	RS5	40S ribosomal protein S5	17	57	1.09446	1.13027	1.27168	0.899342	0.896291	0.801071	0.875076	1.00185	1.00578	RS5	0.860636	0.888796	1	0.707205	0.704806	0.629929	0.688124	0.787816	0.790903	1.16547	0.865568	0.960903	0.742677	0.00889898	-0.429193	2.05066	0.824477	0.0414755	-0.278449	1.38221	1.11014	0.150496	0.150744	0.822476	204	22.8621	9.71533	Housekeeping	40S	6		204
51338632	P62753	RS6	40S ribosomal protein S6	18	66	1.02666	1.15877	1.32394	0.895703	0.774604	0.761089	0.876876	0.97323	1.04345	RS6	0.775457	0.875243	1	0.676542	0.585074	0.574866	0.662322	0.7351	0.788136	1.16979	0.810465	0.964517	0.692829	0.0201066	-0.529429	1.69666	0.82452	0.10585	-0.278373	0.975308	1.19008	0.0753557	0.251057	1.12288	249	28.663	10.8433	Housekeeping	40S	7		249
49065831	P62081	RS7	40S ribosomal protein S7	19	67	0.997447	1.11514	1.27145	0.887135	0.821311	0.791879	0.879449	1.00829	0.983769	RS7	0.784493	0.87706	1	0.697732	0.645962	0.622814	0.691687	0.793018	0.773735	1.12801	0.833442	0.957168	0.738857	0.024938	-0.436633	1.60314	0.848542	0.126211	-0.236942	0.898904	1.14845	0.0632645	0.199691	1.19884	194	22.1133	10.0962	Housekeeping	40S	8		194
50403622	P62241	RS8	40S ribosomal protein S8	20	105	1.07262	1.06091	1.19513	0.936492	0.88765	0.902684	0.916493	0.974734	0.983813	RS8	0.89749	0.887697	1	0.78359	0.742723	0.755302	0.766857	0.815588	0.823185	1.10955	0.908942	0.958347	0.819196	0.0114231	-0.287719	1.94222	0.863723	0.0341251	-0.21136	1.46693	1.05435	0.125413	0.0763596	0.901658	208	24.1902	10.3159	Housekeeping	40S	9		208
20178311	P46781	RS9	40S ribosomal protein S9	21	100	1.07841	1.14783	1.24692	0.898585	0.857185	0.83465	0.894243	1.00117	0.981914	RS9	0.864859	0.920531	1	0.720645	0.687443	0.66937	0.717162	0.802916	0.787473	1.15772	0.863473	0.959109	0.745841	0.00492826	-0.423061	2.30731	0.828448	0.0280476	-0.271517	1.5521	1.11076	0.0649349	0.151544	1.18752	194	22.5776	10.6528	Housekeeping	40S	10		194
1173177	P46783	RS10	40S ribosomal protein S10	22	48	0.957891	1.12315	1.27748	0.911683	0.810183	0.828716	0.950559	0.992358	1.02275	RS10	0.74983	0.879193	1	0.713659	0.634206	0.648713	0.744091	0.776811	0.800604	1.11951	0.850194	0.988556	0.759437	0.0506019	-0.396998	1.29583	0.883029	0.238576	-0.179467	0.622373	1.16274	0.021159	0.217531	1.67451	165	18.8859	10.1548	Housekeeping	40S	11		165
50403609	P62280	RS11	40S ribosomal protein S11	23	62	1.01854	1.0816	1.28857	0.888665	0.860702	0.804557	0.87223	0.968828	1.01187	RS11	0.790448	0.839386	1	0.689654	0.667954	0.624382	0.6769	0.751866	0.785267	1.12957	0.851308	0.950976	0.753656	0.0309299	-0.408022	1.50962	0.841891	0.122424	-0.248295	0.912134	1.11708	0.107114	0.159727	0.970154	158	18.419	10.3013	Housekeeping	40S	12		158
224471878	P25398	RS12	40S ribosomal protein S12	24	54	1.04734	1.12073	1.35745	0.879996	0.861832	0.751902	0.868655	1.00122	1.06581	RS12	0.771549	0.825611	1	0.64827	0.634889	0.553907	0.639915	0.737574	0.785156	1.17517	0.831243	0.978563	0.707337	0.027796	-0.499531	1.55602	0.832697	0.148696	-0.264137	0.827699	1.17723	0.104839	0.235394	0.979477	132	14.5055	7.21045	Housekeeping	40S	13		132
50403608	P62277	RS13	40S ribosomal protein S13	25	51	1.0989	1.105	1.23499	0.876861	0.881338	0.848578	0.891496	0.985338	0.960942	RS13	0.889804	0.894738	1	0.710013	0.713637	0.687111	0.721863	0.797848	0.778094	1.1463	0.868926	0.945925	0.758028	0.00367823	-0.399676	2.43436	0.825201	0.018876	-0.277183	1.72409	1.08861	0.0617678	0.122493	1.20924	151	17.2117	10.5356	Housekeeping	40S	14		151
50403752	P62263	RS14	40S ribosomal protein S14	26	76	0.957815	1.09687	1.17155	0.939796	0.884963	0.881054	0.920332	0.988495	1.03063	RS14	0.817561	0.936257	1	0.802181	0.755377	0.752041	0.785567	0.843749	0.879711	1.07541	0.901938	0.979818	0.83869	0.0569144	-0.253791	1.24478	0.911109	0.245988	-0.134305	0.609086	1.08635	0.105151	0.119486	0.978188	151	16.2625	10.0522	Housekeeping	40S	15		151
51338641	P62841	RS15	40S ribosomal protein S15	27	29	1.12986	1.0844	1.23227	0.847206	0.865398	0.822503	0.86789	0.974153	1.02301	RS15	0.916897	0.880002	1	0.687519	0.702282	0.667472	0.704304	0.790538	0.830185	1.14884	0.845036	0.955017	0.735555	0.00260685	-0.443095	2.58388	0.831287	0.037613	-0.266581	1.42466	1.13015	0.0813164	0.176514	1.08982	145	17.0292	10.3892	Housekeeping	40S	16		145
50403624	P62244	RS15A	40S ribosomal protein S15a	28	65	1.09042	1.09506	1.16903	0.903652	0.897172	0.889881	0.875839	0.966647	0.956247	RS15A	0.932763	0.93673	1	0.772995	0.767452	0.761215	0.749203	0.826882	0.817986	1.11817	0.896902	0.932911	0.802115	0.00101098	-0.31812	2.99526	0.834318	0.00846618	-0.26133	2.07231	1.04015	0.281726	0.0567898	0.550173	130	14.83	10.1255	Housekeeping	40S	17		130
50403607	P62249	RS16	40S ribosomal protein S16	29	82	1.08413	1.13306	1.24647	0.862704	0.897768	0.814513	0.893804	0.991424	0.988128	RS16	0.869756	0.90901	1	0.692117	0.720247	0.653455	0.717067	0.795384	0.79274	1.15455	0.858328	0.957785	0.743431	0.00530666	-0.42773	2.27518	0.829574	0.0271114	-0.269558	1.56685	1.11587	0.0681216	0.158173	1.16672	146	16.435	10.2134	Housekeeping	40S	18		146
133825	P08708	RS17	40S ribosomal protein S17	30	40	1.06727	1.15804	1.34656	0.887855	0.887784	0.828908	0.870896	1.0261	0.968474	RS17	0.792594	0.860001	1	0.659351	0.659298	0.615575	0.646757	0.762017	0.719221	1.19063	0.868182	0.955157	0.729182	0.0188912	-0.45565	1.72374	0.802232	0.066223	-0.317909	1.17899	1.10018	0.15291	0.137741	0.815564	135	15.5404	9.84717	Housekeeping	40S	19		135
50403625	P62269	RS18	40S ribosomal protein S18	31	57	1.09085	1.13173	1.21048	0.905897	0.863892	0.852096	0.936511	0.983655	0.98925	RS18	0.901171	0.934948	1	0.74838	0.71368	0.703935	0.773671	0.812618	0.81724	1.14435	0.873962	0.969805	0.763718	0.00221123	-0.388889	2.65537	0.847471	0.0109174	-0.238764	1.96188	1.10967	0.0148458	0.150124	1.8284	152	17.7079	10.9897	Housekeeping	40S	20		152
730640	P39019	RS19	40S ribosomal protein S19	32	110	1.09673	1.13824	1.28932	0.872445	0.856463	0.808535	0.862393	0.982587	0.993692	RS19	0.850623	0.882822	1	0.676669	0.664272	0.6271	0.668872	0.762095	0.770707	1.17477	0.845814	0.946224	0.719986	0.00592118	-0.47396	2.22759	0.805458	0.0337985	-0.312119	1.4711	1.11871	0.0955292	0.16184	1.01986	145	16.0505	10.3159	Housekeeping	40S	21		145
46397703	P60866	RS20	40S ribosomal protein S20	33	38	1.05226	1.07363	1.12129	0.929236	0.836454	0.855777	0.908036	0.983152	1.04909	RS20	0.938435	0.957493	1	0.828723	0.745977	0.763209	0.809816	0.876806	0.935612	1.08239	0.873823	0.980093	0.807309	0.00392246	-0.308807	2.40644	0.90549	0.0881517	-0.14323	1.05477	1.12162	0.0987559	0.165578	1.00544	119	13.3643	9.93506	Housekeeping	40S	22		119
52783792	P63220	RS21	40S ribosomal protein S21	34	33	0.977127	1.0145	1.20829	0.925817	0.869625	0.811498	0.899321	0.982577	1.02134	RS21	0.808684	0.839615	1	0.76622	0.719714	0.671607	0.744291	0.813195	0.845272	1.06664	0.86898	0.967744	0.814689	0.0663505	-0.295678	1.17816	0.907283	0.284931	-0.140375	0.545261	1.11366	0.113184	0.155303	0.946214	83	9.10557	8.49951	Housekeeping	40S	23		83
50403755	P62266	RS23	40S ribosomal protein S23	35	25	1.02502	1.13924	1.35908	0.861425	0.715122	0.751155	0.912044	0.990242	1.05429	RS23	0.754201	0.838238	1	0.633828	0.526179	0.552691	0.671072	0.728609	0.775735	1.17445	0.775901	0.985525	0.660652	0.0206727	-0.598039	1.6846	0.839139	0.150188	-0.253018	0.823365	1.27017	0.0253523	0.345021	1.59598	143	15.7977	10.4917	Housekeeping	40S	24		143
51338645	P62847	RS24	40S ribosomal protein S24	36	27	1.17472	1.13767	1.29276	0.900288	0.789247	0.797883	0.849542	0.929427	1.00539	RS24	0.908688	0.880032	1	0.696407	0.610512	0.617193	0.657153	0.718947	0.777705	1.20172	0.829139	0.928119	0.689962	0.00317789	-0.53541	2.49786	0.772327	0.0135192	-0.372716	1.86905	1.11938	0.159798	0.162695	0.796428	133	15.4134	10.7847	Housekeeping	40S	25		133
51338648	P62851	RS25	40S ribosomal protein S25	37	44	1.11246	1.15322	1.22256	0.827606	0.840544	0.855683	0.928762	1.06297	0.962863	RS25	0.909944	0.943281	1	0.676947	0.687529	0.699912	0.759687	0.869467	0.78758	1.16274	0.841278	0.984866	0.723528	0.000632664	-0.46688	3.19883	0.847019	0.0260026	-0.239534	1.58498	1.17068	0.0250102	0.227345	1.60188	125	13.7337	10.1108	Housekeeping	40S	26		125
51338650	P62854	RS26	40S ribosomal protein S26	38	17	1.09325	1.14151	1.33442	0.885412	0.745088	0.798321	0.834401	1.01936	0.967538	RS26	0.81927	0.855436	1	0.663517	0.558361	0.598253	0.625291	0.763894	0.725062	1.18973	0.809607	0.940432	0.680498	0.0107324	-0.555338	1.9693	0.790459	0.0535382	-0.339237	1.27134	1.16159	0.129216	0.216101	0.888682	115	13.0071	11.0044	Housekeeping	40S	27		115
51316258	Q71UM5	RS27L	40S ribosomal protein S27-like	39	28	0.958172	1.03291	1.35162	0.862641	0.813723	0.793102	0.921496	1.00128	1.02179	RS27L	0.708906	0.764198	1	0.638228	0.602035	0.586779	0.681771	0.740801	0.755975	1.11423	0.823155	0.981522	0.738764	0.0761288	-0.436814	1.11845	0.880896	0.346366	-0.182957	0.460465	1.19239	0.0127195	0.253857	1.89553	84	9.47087	9.45166	Housekeeping	40S	28		84
302393745	P62979	RS27A	Ubiquitin-40S ribosomal protein S27a	40	291	1.04149	1.0872	1.29121	0.91005	0.787984	0.808236	0.891681	0.983226	1.06055	RS27A	0.806598	0.842001	1	0.704802	0.610267	0.625951	0.690577	0.761475	0.821363	1.13997	0.835423	0.978487	0.732848	0.0235919	-0.448414	1.62724	0.858346	0.150531	-0.220369	0.822375	1.17125	0.081298	0.228046	1.08992	156	17.9535	9.64209	Housekeeping	40S	29		156
51338652	P62857	RS28	40S ribosomal protein S28	41	42	0.904898	1.08027	1.40757	0.893103	0.840023	0.790882	0.893348	1.01276	1.07254	RS28	0.642881	0.767473	1	0.634501	0.59679	0.561878	0.634675	0.71951	0.761982	1.13091	0.841336	0.992883	0.743945	0.126168	-0.426733	0.899051	0.877949	0.427428	-0.187792	0.369137	1.18013	0.0660671	0.238941	1.18001	69	7.8362	10.6968	Housekeeping	40S	30		69
50403626	P62273	RS29	40S ribosomal protein S29	42	2	0.95437	1.02591	1.15871	1.21679	0.941171	0.98806	1.08275	1.09915	1.03243	RS29	0.784331	0.843123	0.952267	1	0.773485	0.812019	0.889841	0.903315	0.848481	1.04633	1.04868	1.07144	1.00224	0.983102	0.00323017	0.00740158	1.024	0.711149	0.0342168	0.148039	1.02171	0.807506	0.0309866	0.0928543	56	6.6723	10.1255	Housekeeping	40S	31		56
51338655	P62861	RS30	40S ribosomal protein S30	43	5	1.02178	1.1007	1.2882	1.0736	0.825938	0.81247	0.962064	1.00683	1.13884	RS30	0.793185	0.854445	1	0.833405	0.641155	0.6307	0.746826	0.781576	0.884055	1.1369	0.904001	1.03591	0.795149	0.115022	-0.330703	0.939218	0.911176	0.348492	-0.134198	0.457807	1.14592	0.258004	0.196505	0.588373	59	6.64382	12.147	Housekeeping	40S(32)	32		59
730565	P39023	RL3	60S ribosomal protein L3	44	141	1.05293	1.05519	1.16376	0.962932	0.940292	0.912965	0.864329	0.943087	0.976558	RL3	0.904766	0.90671	1	0.827434	0.80798	0.784498	0.742706	0.810381	0.839142	1.09062	0.93873	0.927991	0.860726	0.0181022	-0.216373	1.74227	0.85088	0.0302247	-0.232972	1.51964	0.988561	0.781888	-0.0165988	0.106855	403	46.0798	10.1841	Housekeeping	60S	1		403
22002063	P36578	RL4	60S ribosomal protein L4	45	146	1.09057	1.11355	1.09717	0.905443	0.945625	0.878388	0.888027	0.974882	0.964407	RL4	0.979365	1	0.985286	0.813113	0.849199	0.788818	0.797474	0.875472	0.866065	1.10043	0.909819	0.942439	0.826785	0.000771703	-0.274416	3.11255	0.856428	0.00499231	-0.223596	2.3017	1.03585	0.386962	0.0508196	0.412331	427	47.6674	11.063	Housekeeping	60S	2		427
81175191	P46777	RL5	60S ribosomal protein L5	46	103	1.06459	0.973305	1.13033	0.944754	0.945075	0.914054	0.881816	0.961251	1.00563	RL5	0.941843	0.86108	1	0.835822	0.836106	0.808662	0.780141	0.850416	0.889677	1.05608	0.934628	0.949565	0.885001	0.0599278	-0.17625	1.22237	0.899145	0.141092	-0.153374	0.850498	1.01598	0.711804	0.0228751	0.14764	297	34.3407	9.71533	Housekeeping	60S	3		297
1350762	Q02878	RL6	60S ribosomal protein L6	47	106	1.13642	1.06847	1.10653	0.947081	0.953886	0.915224	0.865454	0.952855	0.977169	RL6	1	0.940209	0.973698	0.83339	0.839379	0.805358	0.761562	0.838472	0.859866	1.10381	0.93873	0.931826	0.850448	0.0019929	-0.233705	2.70051	0.844193	0.0118149	-0.244355	1.92757	0.992645	0.857065	-0.0106502	0.0669862	288	32.7076	10.5796	Housekeeping	60S	4		288
133021	P18124	RL7	60S ribosomal protein L7	48	114	1.11103	1.07514	1.14055	0.92977	0.945714	0.953737	0.872363	0.989148	0.95868	RL7	0.974119	0.942652	1	0.815192	0.829172	0.836206	0.76486	0.867253	0.840539	1.10891	0.943074	0.940063	0.850451	0.00119527	-0.233701	2.92253	0.847736	0.013193	-0.238313	1.87965	0.996808	0.936809	-0.00461261	0.0283492	248	29.2072	10.6528	Housekeeping	60S	5		248
52783289	Q6DKI1	RL7L	60S ribosomal protein L7-like 1	49	4	1.06798	1.07651	0.946974	0.903619	0.926189	0.910199	0.772007	0.865608	0.883364	RL7L	0.992081	1	0.879673	0.8394	0.860365	0.845512	0.717142	0.80409	0.820584	1.03049	0.913336	0.840327	0.886315	0.0505668	-0.174109	1.29613	0.815465	0.0247748	-0.294305	1.60599	0.920063	0.106631	-0.120195	0.972118	246	28.6431	10.5063	Housekeeping	60S	5		246
54039239	P62424	RL7A	60S ribosomal protein L7a	50	117	1.10109	1.14309	1.1735	0.909672	0.957818	0.851122	0.894528	0.952604	0.982965	RL7A	0.938293	0.974083	1	0.775176	0.816204	0.725283	0.762271	0.811761	0.837633	1.13923	0.906204	0.943366	0.795455	0.00335157	-0.330148	2.47475	0.828075	0.00420976	-0.272167	2.37574	1.04101	0.408738	0.0579814	0.388555	266	29.977	10.6089	Housekeeping	60S	6		266
51702823	P62917	RL8	60S ribosomal protein L8	51	85	1.06352	1.04482	1.13144	0.963771	0.919627	0.922475	0.854614	0.944422	0.983029	RL8	0.93997	0.923437	1	0.851808	0.812791	0.815309	0.755332	0.834706	0.868828	1.07993	0.935291	0.927355	0.866069	0.00845076	-0.207446	2.0731	0.85872	0.0299784	-0.21974	1.52319	0.991515	0.854648	-0.0122934	0.0682127	257	28.0073	11.0337	Housekeeping	60S	7		257
417677	P32969	RL9	60S ribosomal protein L9	52	60	1.08816	1.07076	1.18169	0.933788	0.928593	0.912518	0.828898	0.954191	0.959988	RL9	0.920854	0.906125	1	0.790217	0.78582	0.772217	0.701453	0.807483	0.812388	1.11353	0.924966	0.914359	0.830658	0.00575948	-0.267673	2.23962	0.821132	0.0222131	-0.284314	1.65339	0.988532	0.818284	-0.0166403	0.0870958	192	21.8498	9.94971	Housekeeping	60S	8		192
148887414	P27635	RL10	60S ribosomal protein L10	53	73	0.929745	1.08527	1.23395	0.910501	0.836559	0.826714	0.910098	1.01256	1.00755	RL10	0.753472	0.879507	1	0.737876	0.677953	0.669975	0.73755	0.820587	0.816527	1.08299	0.857925	0.976737	0.792184	0.0701524	-0.336093	1.15396	0.901892	0.321267	-0.148974	0.493134	1.13849	0.0492319	0.187119	1.30775	214	24.5879	10.0815	Housekeeping	60S	9		214
51702773	P62906	RL10A	60S ribosomal protein L10a	54	58	1.0451	1.0411	1.15353	0.929058	0.920096	0.883997	0.870569	0.950138	1.00469	RL10A	0.906	0.902535	1	0.805405	0.797635	0.76634	0.7547	0.823679	0.870966	1.07991	0.91105	0.941797	0.843636	0.0126997	-0.245308	1.89621	0.872107	0.0615305	-0.197422	1.21091	1.03375	0.497981	0.0478861	0.302788	217	24.8155	9.93506	Housekeeping	60S	10		217
51702795	P62913	RL11	60S ribosomal protein L11	55	45	1.08012	1.03782	1.19401	0.87354	0.943191	0.865227	0.864955	0.939932	1.00851	RL11	0.904617	0.869185	1	0.731602	0.789935	0.72464	0.724412	0.787206	0.844637	1.10398	0.893986	0.937798	0.809783	0.0164255	-0.304393	1.78448	0.849468	0.0562011	-0.235369	1.25026	1.04901	0.41535	0.0690246	0.381586	178	20.2396	9.59814	Housekeeping	60S	11		178
266921	P30050	RL12	60S ribosomal protein L12	56	65	1.04184	1.0139	1.07345	0.953998	0.966457	0.963749	0.933424	0.9673	1.01555	RL12	0.970553	0.944532	1	0.888724	0.90033	0.897808	0.869557	0.901116	0.946069	1.04306	0.961401	0.972093	0.92171	0.00975531	-0.117616	2.01076	0.93196	0.0731661	-0.10166	1.13569	1.01112	0.680598	0.0159553	0.167109	165	17.8075	9.42236	Housekeeping	60S	12		165
21903462	P26373	RL13	60S ribosomal protein L13	57	69	0.904979	1.08851	1.28953	0.918334	0.829313	0.818747	0.92088	1.03396	1.09077	RL13	0.701788	0.84411	1	0.712145	0.643111	0.634917	0.714119	0.801808	0.845863	1.09434	0.855465	1.0152	0.781717	0.107349	-0.355281	0.969204	0.927684	0.55116	-0.108294	0.258723	1.18673	0.0538874	0.246987	1.26851	211	24.2465	11.6489	Housekeeping	60S	13		211
730451	P40429	RL13A	60S ribosomal protein L13a	58	85	1.12416	1.09959	1.14865	0.961549	0.961556	0.940806	0.87262	0.941101	0.976703	RL13A	0.978675	0.957285	1	0.837111	0.837117	0.819052	0.759691	0.81931	0.850304	1.12413	0.954637	0.930142	0.849222	0.000423956	-0.235787	3.37268	0.827431	0.00450072	-0.273289	2.34672	0.974341	0.4778	-0.0375015	0.320754	203	23.5624	10.9312	Housekeeping	60S	14		203
212276521	P50914	RL14	60S ribosomal protein L14	59	65	1.09036	1.09398	1.14703	0.957998	0.954491	0.938766	0.858886	0.934279	0.976358	RL14	0.950591	0.953755	1	0.8352	0.832143	0.818433	0.748792	0.814521	0.851207	1.11046	0.950418	0.923174	0.855881	0.00114282	-0.224517	2.94202	0.831347	0.00858817	-0.266477	2.0661	0.971335	0.478256	-0.0419597	0.320339	215	23.417	10.9312	Housekeeping	60S	15		215
47117726	P61313	RL15	60S ribosomal protein L15	60	71	1.08331	1.04068	1.11843	0.913796	0.940605	0.896992	0.809776	0.946539	0.956778	RL15	0.968598	0.930482	1	0.817035	0.841005	0.80201	0.72403	0.846311	0.855465	1.08081	0.917131	0.904364	0.848563	0.00317081	-0.236907	2.49883	0.83675	0.0281971	-0.257131	1.5498	0.98608	0.80753	-0.0202238	0.0928414	204	24.1311	11.6196	Housekeeping	60S	16		204
132799	P18621	RL17	60S ribosomal protein L17	61	49	1.06716	1.16291	1.24065	0.908808	0.842211	0.853511	0.835632	0.978017	0.985334	RL17	0.860163	0.937338	1	0.732527	0.678847	0.687956	0.673544	0.788311	0.794209	1.1569	0.868177	0.932994	0.750431	0.00598769	-0.41421	2.22274	0.806457	0.0328543	-0.31033	1.48341	1.07466	0.287628	0.10388	0.541168	184	21.3833	10.1694	Housekeeping	60S	17		184
548749	Q07020	RL18	60S ribosomal protein L18	62	80	1.08604	1.02186	1.08823	0.961421	0.926952	0.952556	0.861121	0.946586	0.969999	RL18	0.997983	0.939013	1	0.88347	0.851796	0.875324	0.791303	0.869838	0.891352	1.06538	0.946976	0.925902	0.888864	0.00796362	-0.169965	2.09889	0.869083	0.0244138	-0.202434	1.61236	0.977746	0.576045	-0.0324688	0.239544	188	21.6211	11.7222	Housekeeping	60S	18		188
730538	Q02543	RL18A	60S ribosomal protein L18a	63	75	1.04171	1.00997	1.11122	0.949331	0.958287	0.92711	0.872516	0.944384	0.96773	RL18A	0.937448	0.908888	1	0.854315	0.862375	0.834319	0.785188	0.849863	0.870872	1.0543	0.94491	0.92821	0.896243	0.0250129	-0.158038	1.60184	0.880403	0.0382151	-0.183763	1.41777	0.982327	0.608729	-0.0257253	0.215576	176	20.7489	10.7114	Housekeeping	60S	19		176
51338661	P84098	RL19	60S ribosomal protein L19	64	59	1.12764	1.1246	1.21997	0.956821	0.905677	0.894788	0.875447	0.940545	0.975622	RL19	0.924316	0.921824	1	0.7843	0.742378	0.733453	0.717598	0.770959	0.799712	1.1574	0.919095	0.930538	0.794104	0.00289409	-0.332601	2.53849	0.80399	0.0061382	-0.31475	2.21196	1.01245	0.760296	0.0178506	0.119018	196	23.4512	11.4731	Housekeeping	60S	20		196
1172991	P46778	RL21	60S ribosomal protein L21	65	53	1.06875	1.06995	1.23571	0.936444	0.893866	0.869565	0.877311	0.976808	0.993711	RL21	0.864885	0.865858	1	0.757816	0.72336	0.703695	0.709963	0.79048	0.804159	1.12481	0.899958	0.949277	0.800101	0.0187138	-0.321746	1.72784	0.843947	0.0570979	-0.244775	1.24338	1.0548	0.297767	0.0769703	0.526123	160	18.5531	10.4917	Housekeeping	60S	21		160
464628	P35268	RL22	60S ribosomal protein L22	66	40	1.01102	0.987668	1.05567	0.986245	0.93872	0.982612	0.873523	1.00879	1.01054	RL22	0.957705	0.935586	1	0.934238	0.889219	0.930797	0.82746	0.955595	0.957252	1.01812	0.969193	0.964285	0.951945	0.12332	-0.0710503	0.908968	0.947125	0.338582	-0.0783736	0.470336	0.994937	0.923306	-0.00732338	0.0346545	128	14.7778	9.18799	Housekeeping	60S	22		128
109893176	Q6P5R6	RL22L	60S ribosomal protein L22-like 1	67	10	1.25823	1.09244	1.28318	0.857626	0.909345	0.903797	0.765573	0.758943	0.810893	RL22L	0.980553	0.851351	1	0.668358	0.708663	0.704339	0.59662	0.591453	0.631938	1.21128	0.890256	0.77847	0.734968	0.00663937	-0.444246	2.17787	0.642681	0.00222051	-0.637825	2.65355	0.874434	0.00844952	-0.193579	2.07317	122	14.5976	9.37842	Housekeeping	60S	22		122
51338639	P62829	RL23	60S ribosomal protein L23	68	50	0.944341	1.02649	1.30384	0.880648	0.826703	0.81522	0.933546	1.01501	1.05108	RL23	0.724277	0.787279	1	0.675426	0.634053	0.625246	0.715997	0.778481	0.806144	1.09156	0.840857	0.999881	0.770329	0.0860654	-0.376453	1.06517	0.916015	0.467029	-0.126557	0.330656	1.18912	0.0167235	0.249896	1.77667	140	14.8561	10.5063	Housekeeping	60S	23		140
51338637	P62750	RL23A	60S ribosomal protein L23a	69	71	1.06732	1.13909	1.24756	0.897437	0.817361	0.779264	0.88246	0.968408	1.00779	RL23A	0.855531	0.913059	1	0.719355	0.655169	0.624631	0.70735	0.776243	0.807812	1.15133	0.831354	0.952887	0.722084	0.00704835	-0.469761	2.15191	0.827643	0.0364341	-0.27292	1.43849	1.14619	0.0750226	0.196842	1.12481	156	17.6841	10.4478	Housekeeping	60S	24		156
41393532	P83731	RL24	60S ribosomal protein L24	70	65	1.06373	1.08938	1.23765	0.938815	0.853699	0.826222	0.870664	0.956831	1.0089	RL24	0.85948	0.880203	1	0.758548	0.689776	0.667575	0.703484	0.773105	0.815174	1.13025	0.872912	0.945464	0.772315	0.0157928	-0.372739	1.80154	0.836506	0.0521385	-0.257552	1.28284	1.08312	0.240359	0.115187	0.61914	157	17.7679	11.2534	Housekeeping	60S	25		157
23396835	Q9UNX3	RL26L	60S ribosomal protein L26-like 1	71	39	1.19621	1.28451	1.48103	0.780998	0.878556	0.882077	0.95849	1.09892	1.10406	RL26L	0.807682	0.867306	1	0.527332	0.593204	0.595582	0.647176	0.741998	0.745465	1.32058	0.84721	1.05383	0.641542	0.00637081	-0.640384	2.19581	0.797999	0.0509945	-0.32554	1.29248	1.24388	0.0236201	0.314843	1.62672	145	17.2456	10.5503	Housekeeping	60S	26		145
47117765	P61254	RL26	60S ribosomal protein L26	72	50	1.08827	1.16943	1.38602	0.812566	0.788923	0.77987	0.829342	0.97485	0.979741	RL26	0.78518	0.843734	1	0.58626	0.569202	0.56267	0.598364	0.703347	0.706875	1.21457	0.793787	0.927978	0.653552	0.00926121	-0.613626	2.03333	0.764036	0.0478466	-0.388287	1.32015	1.16905	0.0559066	0.225339	1.25254	145	17.2475	10.5503	Housekeeping	60S	26		145
47117772	P61353	RL27	60S ribosomal protein L27	73	56	1.1275	1.06716	1.14993	0.96712	1.0002	0.958672	0.860795	0.957945	0.970586	RL27	0.980492	0.928016	1	0.841022	0.869788	0.833675	0.74856	0.833043	0.844036	1.11486	0.975331	0.929775	0.874842	0.00736679	-0.192905	2.13272	0.833981	0.0121957	-0.261914	1.91379	0.953292	0.28484	-0.0690092	0.545399	136	15.7877	10.5649	Housekeeping	60S	27		136
1173017	P46776	RL27A	60S ribosomal protein L27a	74	47	1.0646	1.0823	1.1828	0.829003	0.872591	0.788879	0.905485	0.978105	0.966507	RL27A	0.900061	0.915029	1	0.700879	0.737731	0.666956	0.765541	0.826937	0.817132	1.1099	0.830158	0.950032	0.747957	0.00314633	-0.418973	2.5022	0.855962	0.0207504	-0.224382	1.68297	1.1444	0.0221958	0.194591	1.65373	148	16.551	11.0044	Housekeeping	60S	28		148
22002069	P46779	RL28	60S ribosomal protein L28	75	68	1.09167	1.02427	1.16286	0.91624	0.883726	0.898444	0.829134	0.957401	0.976198	RL28	0.938787	0.880824	1	0.787923	0.759962	0.772619	0.713015	0.823319	0.839483	1.09293	0.89947	0.920911	0.822987	0.00925939	-0.281058	2.03342	0.842605	0.0481035	-0.247072	1.31782	1.02384	0.672914	0.0339863	0.17204	137	15.7377	12.0151	Housekeeping	60S	29		137
1350706	P47914	RL29	60S ribosomal protein L29	76	37	1.10777	1.0675	1.13424	0.940531	0.819969	0.825072	0.825929	0.938404	1.05833	RL29	0.976662	0.941157	1	0.829214	0.722922	0.72742	0.728176	0.827339	0.933075	1.10317	0.861857	0.940889	0.781253	0.00533308	-0.356138	2.27302	0.852893	0.0808425	-0.229563	1.09236	1.0917	0.367133	0.126575	0.435176	159	17.7411	11.6636	Housekeeping	60S	30		159
51702805	P62888	RL30	60S ribosomal protein L30	77	42	1.08621	1.07327	1.17222	0.932911	0.964724	0.910216	0.855003	0.971262	0.974392	RL30	0.926632	0.915594	1	0.795852	0.822992	0.776492	0.729391	0.82857	0.83124	1.11057	0.93595	0.933553	0.842767	0.00742902	-0.246794	2.12907	0.840609	0.0241203	-0.250493	1.61762	0.997439	0.95757	-0.00369994	0.0188294	115	12.7757	9.62744	Housekeeping	60S	31		115
51702807	P62899	RL31	60S ribosomal protein L31	78	72	1.0941	1.06943	1.16366	0.928507	0.918522	0.914366	0.844278	0.951056	0.969233	RL31	0.940223	0.91902	1	0.79792	0.789339	0.785767	0.725536	0.817297	0.832918	1.10906	0.920465	0.921522	0.829949	0.00271214	-0.268906	2.56669	0.830902	0.0175764	-0.26725	1.75507	1.00115	0.979779	0.00165589	0.00887177	125	14.4539	10.5356	Housekeeping	60S	32		125
51702809	P62910	RL32	60S ribosomal protein L32	79	34	1.07109	1.06062	1.12703	0.872446	0.959351	0.84551	0.865839	0.973979	0.991071	RL32	0.950366	0.941071	1	0.774109	0.851219	0.750209	0.768247	0.864199	0.879364	1.08625	0.892436	0.94363	0.821577	0.00841286	-0.283532	2.07506	0.868706	0.0322926	-0.20306	1.4909	1.05736	0.381643	0.0804726	0.418343	135	15.8498	11.3267	Housekeeping	60S	33		135
22002070	P49207	RL34	60S ribosomal protein L34	80	64	1.02962	1.13791	1.26085	0.925504	0.833409	0.812575	0.867505	0.985158	1.01333	RL34	0.816613	0.9025	1	0.734033	0.660991	0.644468	0.688034	0.781346	0.803688	1.1428	0.857163	0.95533	0.750058	0.019187	-0.414926	1.71699	0.835959	0.0799735	-0.258495	1.09705	1.11453	0.1576	0.156431	0.802445	117	13.2845	11.4731	Housekeeping	60S	34		117
1173039	P42766	RL35	60S ribosomal protein L35	81	42	1.13202	1.07421	1.22026	0.949841	0.84799	0.928733	0.819973	0.961768	0.962506	RL35	0.927686	0.880314	1	0.778394	0.694927	0.761095	0.671967	0.788168	0.788772	1.14216	0.908855	0.914749	0.795732	0.0113716	-0.329645	1.94418	0.800893	0.0232938	-0.320319	1.63276	1.00649	0.92214	0.00932578	0.035203	123	14.5426	11.0483	Housekeeping	60S	35		123
22002061	P18077	RL35A	60S ribosomal protein L35a	82	60	1.12068	1.01678	1.10536	0.928361	0.972587	0.971753	0.826827	0.930792	0.988477	RL35A	1	0.90729	0.98633	0.828393	0.867857	0.867113	0.737792	0.830562	0.882035	1.08094	0.957567	0.915365	0.885867	0.025517	-0.174838	1.59317	0.846825	0.0446294	-0.239865	1.35038	0.955928	0.44195	-0.0650264	0.354627	110	12.5298	11.063	Housekeeping	60S	36		110
7388073	Q9Y3U8	RL36	60S ribosomal protein L36	83	29	0.928289	1.00534	1.13657	0.90685	0.952779	0.85492	0.93137	0.957884	1.04929	RL36	0.816746	0.884535	1	0.797882	0.838293	0.752192	0.819456	0.842784	0.923209	1.0234	0.90485	0.979515	0.884161	0.15178	-0.177619	0.818786	0.95712	0.567446	-0.0632289	0.246076	1.08252	0.176517	0.11439	0.753214	105	12.2459	11.5903	Housekeeping	60S	37		105
47117731	P83881	RL36A	60S ribosomal protein L36a	84	38	1.05541	1.11192	1.40186	0.880816	0.808089	0.765372	0.777726	0.915487	0.96858	RL36A	0.75286	0.793171	1	0.628318	0.576439	0.545967	0.55478	0.65305	0.690923	1.18973	0.818092	0.887264	0.687629	0.0298215	-0.540298	1.52547	0.74577	0.0674568	-0.423197	1.17097	1.08455	0.354456	0.1171	0.450438	106	12.4328	10.5796	Housekeeping	60S	38		106
57013007	Q969Q0	RL36L	60S ribosomal protein L36a-like	85	32	0.865093	0.915749	1.13839	0.983832	0.866892	0.953514	1.0695	1.1038	1.18295	RL36L	0.731301	0.774122	0.962335	0.831676	0.732822	0.806047	0.904091	0.933092	1	0.973079	0.934746	1.11875	0.960607	0.695106	-0.0579823	0.157949	1.1497	0.182437	0.201259	0.738886	1.19685	0.0192566	0.259241	1.71542	106	12.4608	10.6528	Housekeeping	60S	38		106
48429090	P61927	RL37	60S ribosomal protein L37	86	8	1.06245	1.05694	1.1026	1.01572	0.868273	0.887439	0.757799	0.913444	1.00615	RL37	0.96358	0.958583	1	0.921206	0.787476	0.804858	0.687282	0.828443	0.912526	1.07399	0.923812	0.892465	0.860164	0.0362833	-0.217316	1.44029	0.830977	0.0698914	-0.267119	1.15558	0.966068	0.733881	-0.0498031	0.134374	97	11.0709	11.7368	Housekeeping	60S	39		97
47606455	P61513	RL37A	60S ribosomal protein L37a	87	8	1.09571	1.03697	1.2246	0.979065	0.902746	0.906875	0.984988	0.993219	1.0183	RL37A	0.894747	0.846781	1	0.799497	0.737175	0.740547	0.804334	0.811055	0.831539	1.11909	0.929562	0.998837	0.830639	0.0354449	-0.267707	1.45045	0.892542	0.0995815	-0.164009	1.00182	1.07452	0.0605729	0.103698	1.21772	92	10.2685	10.4331	Housekeeping	60S	40		92
52783779	P63173	RL38	60S ribosomal protein L38	88	9	0.587341	0.865789	1.62974	0.792219	0.765303	0.72212	0.90485	1.19947	1.28855	RL38	0.360389	0.531243	1	0.486101	0.469586	0.443089	0.555211	0.735987	0.790646	1.02762	0.759881	1.13096	0.739454	0.439557	-0.435467	0.356985	1.10055	0.771478	0.13823	0.112676	1.48833	0.0344458	0.573697	1.46286	70	8.21273	10.0962	Housekeeping	60S	41		70
205829460	Q59GN2	R39L5	Putative 60S ribosomal protein L39-like 5	89	9	0.991545	0.793381	1.08723	0.929187	0.948876	0.873878	0.871108	0.862876	0.916022	R39L5	0.911989	0.729724	1	0.854634	0.872744	0.803763	0.801215	0.793643	0.842525	0.957387	0.917314	0.883335	0.958143	0.677169	-0.0616864	0.169303	0.922652	0.447877	-0.116141	0.348841	0.962959	0.289747	-0.0544544	0.537981	51	6.3186	12.3228	Housekeeping	60S	42		51
302393718	P62987	RL40	Ubiquitin-60S ribosomal protein L40	90	264	0.965785	1.00961	1.6966	0.636517	0.696364	0.569782	0.759893	1.09989	1.1517	RL40	0.569247	0.595076	1	0.375172	0.410447	0.335837	0.447892	0.648292	0.678827	1.224	0.634221	1.00383	0.518156	0.0694618	-0.948542	1.15825	0.820123	0.455369	-0.286088	0.341636	1.58277	0.0448793	0.662454	1.34795	128	14.719	9.83252	Housekeeping	60S	43		128
133041	P05388	RLA0	60S acidic ribosomal protein P0	91	113	1.13875	1.11482	1.14974	0.814651	0.972679	0.853199	0.911	1.00324	0.962414	RLA0	0.990446	0.969635	1	0.708555	0.846002	0.742082	0.792356	0.872584	0.837074	1.13444	0.880176	0.958885	0.77587	0.00641137	-0.366112	2.19305	0.845252	0.00357451	-0.242547	2.44678	1.08942	0.222496	0.123565	0.652677	317	34.2518	5.97314	Housekeeping	60S	45		317
133051	P05386	RLA1	60S acidic ribosomal protein P1	92	20	1.10257	1.01471	1.13577	0.89037	0.937582	0.857133	0.857276	0.916033	0.937153	RLA1	0.970765	0.893415	1	0.783935	0.825503	0.754671	0.754796	0.806529	0.825125	1.08435	0.895029	0.903487	0.825405	0.0116647	-0.276826	1.93313	0.833205	0.0139563	-0.263256	1.85523	1.00945	0.81258	0.0135702	0.0901338	114	11.5067	4.32275	Housekeeping	60S	46		114
133061	P05387	RLA2	60S acidic ribosomal protein P2	93	74	1.10451	1.06346	1.12854	0.870558	0.93291	0.889579	0.859447	0.946589	0.943241	RLA2	0.978708	0.942328	1	0.7714	0.826651	0.788255	0.761556	0.838772	0.835805	1.09884	0.897682	0.916426	0.816938	0.00161227	-0.291701	2.79256	0.833996	0.00598713	-0.261887	2.22278	1.02088	0.610331	0.0298137	0.214435	115	11.6578	4.53857	Housekeeping	60S(47)	47		115
239938694	Q9BYD6	RM01	39S ribosomal protein L1, mitochondrial	94	12	1.15947	0.992347	0.885087	1.0774	1.15364	1.10728	0.695725	0.896386	0.905046	RM01	1	0.855859	0.763352	0.929218	0.994968	0.954984	0.600035	0.773097	0.780566	1.0123	1.11277	0.832386	1.09925	0.29201	0.13652	0.534603	0.82227	0.162129	-0.282317	0.79014	0.748027	0.0175321	-0.418837	1.75617	325	36.8854	8.77783	Housekeeping	39S (MT)	1		325
118573672	Q5T653	RM02	39S ribosomal protein L2, mitochondrial	95	4	1.02549	0.974401	0.880865	1.00754	1.12017	1.14963	0.738665	0.996859	0.994204	RM02	0.892017	0.847582	0.766219	0.876406	0.974377	1	0.642526	0.867116	0.864807	0.960251	1.09244	0.909909	1.13767	0.0944438	0.186076	1.02483	0.947575	0.626065	-0.0776882	0.203381	0.832912	0.129879	-0.263765	0.886462	305	33.2797	11.2974	Housekeeping	39S (MT)	2		305
133116	P09001	RM03	39S ribosomal protein L3, mitochondrial	96	11	1.06154	0.980432	0.890294	1.06762	1.10685	1.0465	0.750718	0.946663	0.993518	RM03	0.959066	0.885785	0.804348	0.964553	1	0.945478	0.678247	0.855276	0.897607	0.977423	1.07366	0.896966	1.09846	0.140868	0.135478	0.851187	0.917685	0.418592	-0.12393	0.378209	0.835431	0.081891	-0.259407	1.08676	348	38.6081	9.48096	Housekeeping	39S (MT)	3		348
74733471	Q9BYD3	RM04	39S ribosomal protein L4, mitochondrial	97	19	1.04966	0.979716	0.979377	0.940697	1.12922	1.03189	0.885192	0.984934	0.96688	RM04	0.929544	0.867605	0.867305	0.833052	1	0.913812	0.783898	0.872227	0.856239	1.00292	1.03394	0.945669	1.03093	0.628189	0.0439454	0.20191	0.942919	0.211914	-0.0847948	0.67384	0.91463	0.230628	-0.12874	0.637088	311	34.8973	9.71533	Housekeeping	39S (MT)	4		311
209572671	Q9BYD2	RM09	39S ribosomal protein L9, mitochondrial	98	6	1.12576	1.01728	0.931849	1.02579	1.09923	1.06319	0.74889	0.913274	0.906494	RM09	1	0.903635	0.82775	0.911194	0.976433	0.944414	0.665229	0.811249	0.805227	1.02496	1.06273	0.856219	1.03685	0.563056	0.0522099	0.249449	0.835366	0.0955232	-0.259519	1.01989	0.805675	0.0232303	-0.311729	1.63395	267	30.2244	10.0815	Housekeeping	39S (MT)	5		267
215274216	Q7Z7H8	RM10	39S ribosomal protein L10, mitochondrial	99	1	1.01371	1.02322	1.02744	0.987232	1.01701	1.10901	0.949533	0.999791	1.07482	RM10	0.914067	0.922642	0.926443	0.890189	0.917039	1	0.856196	0.901513	0.969169	1.02146	1.03775	1.00805	1.01595	0.681443	0.0228315	0.16657	0.986872	0.732838	-0.0190646	0.134992	0.971377	0.596094	-0.0418961	0.224685	261	29.2637	9.5835	Housekeeping	39S (MT)	6		261
22001931	Q9Y3B7	RM11	39S ribosomal protein L11, mitochondrial	100	19	1.08272	1.03735	0.892009	1.0595	1.20562	1.13553	0.79971	0.989421	0.953577	RM11	0.898058	0.860428	0.739877	0.878799	1	0.941867	0.663319	0.820675	0.790945	1.00402	1.13355	0.914236	1.12901	0.143587	0.175053	0.842885	0.910572	0.334096	-0.135156	0.476129	0.806525	0.037984	-0.310208	1.4204	192	20.6704	9.90576	Housekeeping	39S (MT)	7		192
20981709	P52815	RM12	39S ribosomal protein L12, mitochondrial	101	22	1.20147	1.07283	0.915561	0.951246	1.29088	1.0544	0.904545	0.962878	0.935871	RM12	0.930734	0.831085	0.709252	0.736897	1	0.816808	0.700719	0.745908	0.724986	1.06329	1.09884	0.934431	1.03344	0.798238	0.0474552	0.0978676	0.878814	0.201419	-0.18637	0.695899	0.850377	0.182056	-0.233825	0.739795	198	21.3346	8.86572	Housekeeping	39S (MT)	8		198
22257023	Q9BYD1	RM13	39S ribosomal protein L13, mitochondrial	102	9	1.02328	0.983974	0.94201	1.05392	1.13176	1.10653	0.968346	1.08715	1.05886	RM13	0.904151	0.869419	0.83234	0.93122	1	0.97771	0.85561	0.960585	0.935584	0.983089	1.0974	1.03812	1.11628	0.0252539	0.158701	1.59767	1.05598	0.268202	0.0785777	0.571538	0.945977	0.235861	-0.0801231	0.627343	178	20.6787	9.15869	Housekeeping	39S (MT)	9		178
74749064	Q6P1L8	RM14	39S ribosomal protein L14, mitochondrial	103	2	0.981091	0.998045	0.955393	1.05372	1.21343	1.0727	0.961625	0.981102	1.07436	RM14	0.808526	0.822498	0.787348	0.868383	1	0.88402	0.792484	0.808535	0.885386	0.978176	1.11328	1.00569	1.13812	0.0597678	0.186655	1.22353	1.02813	0.497602	0.0400255	0.303118	0.903358	0.153664	-0.14663	0.813427	145	15.9374	10.2427	Housekeeping	39S (MT)	10		145
74734761	Q9P015	RM15	39S ribosomal protein L15, mitochondrial	104	13	1.07036	1.05361	0.913863	1.05742	1.15453	1.10427	0.856309	0.975613	1.01564	RM15	0.927096	0.912589	0.791548	0.915887	1	0.956471	0.741697	0.845033	0.879705	1.01261	1.1054	0.949188	1.09164	0.178767	0.126497	0.747714	0.937369	0.409594	-0.0933115	0.387646	0.858679	0.0479995	-0.219808	1.31876	296	33.3989	10.0083	Housekeeping	39S (MT)	11		296
74734684	Q9NX20	RM16	39S ribosomal protein L16, mitochondrial	105	5	1.08877	0.936143	0.849697	1.04877	1.25465	1.12079	0.787211	0.894176	1.01642	RM16	0.867787	0.746136	0.677236	0.835902	1	0.893308	0.627432	0.712687	0.81012	0.958205	1.14141	0.899269	1.19119	0.118211	0.252406	0.927342	0.938494	0.573532	-0.0915807	0.241443	0.787861	0.053913	-0.343986	1.26831	251	28.431	10.1255	Housekeeping	39S (MT)	12		251
74752931	Q9NRX2	RM17	39S ribosomal protein L17, mitochondrial	106	5	1.18093	1.08681	0.896682	0.926946	1.09972	1.05117	0.8151	1.01586	0.978657	RM17	1	0.920297	0.7593	0.784927	0.93123	0.890116	0.690217	0.860222	0.828715	1.05481	1.02594	0.93654	0.972636	0.783356	-0.0400277	0.106041	0.887878	0.31848	-0.171567	0.496918	0.912857	0.327967	-0.13154	0.48417	175	20.0376	10.1108	Housekeeping	39S (MT)	13		175
41017797	Q9H0U6	RM18	39S ribosomal protein L18, mitochondrial	107	5	0.943999	0.924389	0.853823	1.02455	1.07033	0.984863	0.890906	1.01639	1.08289	RM18	0.871737	0.853628	0.788464	0.946122	0.988395	0.909473	0.822708	0.938582	1	0.907404	1.02658	0.996729	1.13134	0.0319076	0.178029	1.49611	1.09844	0.226731	0.135456	0.644489	0.970922	0.65261	-0.0425732	0.185347	180	20.5635	9.53955	Housekeeping	39S (MT)	14		180
92090636	P49406	RM19	39S ribosomal protein L19, mitochondrial	108	13	1.08079	0.985917	0.857151	1.04481	1.09322	1.10007	0.745244	0.994373	0.977844	RM19	0.982472	0.896228	0.779177	0.94976	0.993768	1	0.677449	0.903915	0.88889	0.97462	1.07937	0.90582	1.10747	0.193532	0.147273	0.713248	0.929409	0.541807	-0.105615	0.266156	0.839215	0.102609	-0.252887	0.988815	292	33.5136	9.49561	Housekeeping	39S (MT)	15		292
74752447	Q9BYC9	RM20	39S ribosomal protein L20, mitochondrial	109	2	1.00348	0.972435	0.87063	1.09862	1.12429	1.11353	0.77565	0.932309	0.928373	RM20	0.892541	0.86493	0.774379	0.977164	1	0.990428	0.689899	0.82924	0.825739	0.948848	1.11215	0.878777	1.1721	0.0161064	0.229101	1.793	0.926152	0.343964	-0.110679	0.463487	0.790162	0.0110036	-0.33978	1.95847	149	17.4316	10.8579	Housekeeping	39S (MT)	16		149
229462820	Q7Z2W9	RM21	39S ribosomal protein L21, mitochondrial	110	6	1.04954	0.945465	0.791863	1.16222	1.09153	1.14698	0.898277	0.937943	0.913062	RM21	0.903051	0.813502	0.681339	1	0.939183	0.98689	0.7729	0.80703	0.785622	0.928956	1.13358	0.916427	1.22027	0.0583092	0.287199	1.23426	0.986513	0.876623	-0.0195902	0.0571874	0.808439	0.000880539	-0.306789	3.05525	205	22.8003	9.89111	Housekeeping	39S (MT)	17		205
74753031	Q9NWU5	RM22	39S ribosomal protein L22, mitochondrial	111	23	1.06957	0.977899	0.906542	1.02555	1.10001	1.11288	0.913048	0.985446	0.973255	RM22	0.961085	0.878713	0.814594	0.921535	0.988436	1	0.82044	0.885495	0.87454	0.98467	1.07948	0.95725	1.09629	0.156735	0.132624	0.804835	0.972153	0.627292	-0.0407446	0.20253	0.88677	0.0256102	-0.173368	1.59159	206	23.6256	9.93506	Housekeeping	39S (MT)	18		206
68566020	Q16540	RM23	39S ribosomal protein L23, mitochondrial	112	2	1.12565	1.00506	0.870302	1.1037	1.05762	1.06237	0.811345	0.929971	0.985053	RM23	1	0.892874	0.773159	0.980506	0.939572	0.943785	0.720782	0.826167	0.875101	1.00034	1.07456	0.90879	1.0742	0.379407	0.103268	0.420895	0.908485	0.365676	-0.138466	0.436904	0.845728	0.035863	-0.241734	1.44535	153	17.7701	9.68604	Housekeeping	39S (MT)	19		153
74751733	Q96A35	RM24	39S ribosomal protein L24, mitochondrial	113	7	0.971518	0.974497	0.908877	1.10331	1.10513	1.11646	0.821095	0.914327	0.97599	RM24	0.870181	0.872849	0.814074	0.988222	0.98986	1	0.735448	0.818955	0.874186	0.951631	1.1083	0.903804	1.16463	0.00198116	0.219873	2.70308	0.949742	0.391656	-0.0743923	0.407095	0.815488	0.0106323	-0.294265	1.97337	216	24.899	9.29053	Housekeeping	39S (MT)	20		216
20139806	Q9P0M9	RM27	39S ribosomal protein L27, mitochondrial	114	5	0.970358	0.858094	0.877208	0.993251	1.07795	1.04204	0.882641	1.01252	1.00119	RM27	0.900187	0.796042	0.813773	0.921425	1	0.966689	0.818814	0.939303	0.928789	0.901886	1.03775	0.965451	1.15064	0.0329675	0.202439	1.48191	1.07048	0.30524	0.0982572	0.515358	0.930332	0.208352	-0.104182	0.681203	148	16.0627	10.4185	Housekeeping	39S (MT)	21		148
85695426	Q13084	RM28	39S ribosomal protein L28, mitochondrial	115	11	1.10207	0.976706	0.897729	1.0616	1.09688	1.07075	0.787898	0.983427	1.0231	RM28	1	0.886245	0.814583	0.96328	0.995289	0.971578	0.714924	0.892343	0.928343	0.992169	1.07641	0.931475	1.08491	0.235721	0.117572	0.627601	0.938827	0.553409	-0.0910685	0.256954	0.865353	0.119762	-0.20864	0.921682	256	30.1379	8.29443	Housekeeping	39S (MT)	22		256
74730583	Q8TCC3	RM30	39S ribosomal protein L30, mitochondrial	116	2	1.12513	0.943801	0.849553	1.04184	1.07685	1.11972	0.848113	0.907248	0.929373	RM30	1	0.83884	0.755073	0.92598	0.957095	0.995191	0.753794	0.806352	0.826016	0.972827	1.07947	0.894911	1.10962	0.272786	0.150069	0.564178	0.919908	0.408283	-0.120439	0.389039	0.829028	0.00506878	-0.270508	2.2951	161	18.5341	9.99365	Housekeeping	39S (MT)	23		161
22001923	Q9BYC8	RM32	39S ribosomal protein L32, mitochondrial	117	3	1.0409	0.958222	0.802247	1.11154	0.882442	0.975507	0.824998	0.912525	0.94841	RM32	0.936445	0.862065	0.721742	1	0.793889	0.877615	0.74221	0.820953	0.853237	0.933789	0.98983	0.895311	1.06001	0.592726	0.0840844	0.227146	0.958793	0.65164	-0.0607081	0.185992	0.904509	0.28126	-0.144792	0.550891	188	21.3911	9.72998	Housekeeping	39S (MT)	24		188
74735511	O75394	RM33	39S ribosomal protein L33, mitochondrial	118	3	0.981224	0.868909	0.810917	0.958706	1.01312	1.00596	0.691594	0.933558	0.934566	RM33	0.968515	0.857654	0.800414	0.946289	1	0.992932	0.682636	0.921467	0.922461	0.887016	0.992597	0.853239	1.11903	0.11629	0.162247	0.934458	0.961921	0.740224	-0.0560103	0.130637	0.859603	0.166878	-0.218257	0.7776	65	7.61427	10.7993	Housekeeping	39S (MT)	25		65
20139691	Q9BQ48	RM34	39S ribosomal protein L34, mitochondrial	119	2	1.12405	0.987119	0.961886	1.08552	1.11546	1.14191	0.786115	1.00598	1.0473	RM34	0.98436	0.864446	0.842348	0.950616	0.97684	1	0.688422	0.880959	0.917146	1.02435	1.1143	0.946463	1.08781	0.164591	0.121422	0.783595	0.923963	0.46024	-0.114093	0.337015	0.849382	0.112214	-0.235515	0.949952	92	10.1586	12.2495	Housekeeping	39S (MT)	26		92
124028627	Q9NZE8	RM35	39S ribosomal protein L35, mitochondrial	120	2	1.01198	0.969815	1.11503	1.02911	1.15416	1.09442	0.891554	0.939708	0.976835	RM35	0.876814	0.840281	0.966097	0.891659	1	0.948246	0.772472	0.814194	0.846363	1.03227	1.09257	0.936033	1.05841	0.344154	0.0818925	0.463248	0.906767	0.124858	-0.141196	0.903584	0.856729	0.0231962	-0.223089	1.63458	188	21.5008	11.2974	Housekeeping	39S (MT)	27		188
152083350	Q9BZE1	RM37	39S ribosomal protein L37, mitochondrial	121	10	0.97405	0.893542	0.835824	1.00117	1.04466	1.03182	0.734092	0.886854	0.902925	RM37	0.932407	0.855341	0.800091	0.958367	1	0.987706	0.702708	0.848939	0.864323	0.901139	1.02588	0.84129	1.13843	0.0414508	0.187045	1.38247	0.933586	0.422771	-0.0991453	0.373894	0.820065	0.0289288	-0.286191	1.53867	423	48.0871	8.5874	Housekeeping	39S (MT)	29		423
118573679	Q96DV4	RM38	39S ribosomal protein L38, mitochondrial	122	23	1.02648	0.980398	0.924067	1.08476	1.07684	1.11964	0.892753	0.975183	0.999352	RM38	0.916792	0.875638	0.825327	0.968852	0.961777	1	0.797359	0.870981	0.892567	0.97698	1.09375	0.955763	1.11952	0.0226756	0.162879	1.64444	0.978283	0.653399	-0.031676	0.184821	0.873842	0.016675	-0.194555	1.77793	380	44.5684	7.53271	Housekeeping	39S (MT)	30		380
296452977	Q9NYK5	RM39	39S ribosomal protein L39, mitochondrial	123	21	1.07752	0.98007	0.902172	1.06304	1.16468	1.06409	0.821616	0.958743	0.975493	RM39	0.92516	0.841491	0.774607	0.91273	1	0.913626	0.705441	0.823179	0.837561	0.986587	1.09727	0.918617	1.11219	0.143311	0.1534	0.843721	0.931106	0.388648	-0.102982	0.410443	0.837184	0.0393699	-0.256383	1.40484	338	38.6867	7.6499	Housekeeping	39S (MT)	31		338
21263795	Q9NQ50	RM40	39S ribosomal protein L40, mitochondrial	124	10	1.04147	0.905502	0.843415	1.11308	1.19055	1.15861	0.705943	0.93194	0.943315	RM40	0.87478	0.760573	0.708423	0.934927	1	0.973171	0.592954	0.78278	0.792334	0.930129	1.15408	0.860399	1.24077	0.0232862	0.311241	1.6329	0.925032	0.511693	-0.112425	0.290991	0.745528	0.021806	-0.423665	1.66142	206	24.4752	9.62744	Housekeeping	39S (MT)	32		206
74750734	Q8IXM3	RM41	39S ribosomal protein L41, mitochondrial	125	12	1.14953	1.04111	0.850393	1.11939	1.20404	1.20058	0.716391	0.975354	0.98525	RM41	0.954728	0.864682	0.706284	0.929696	1	0.997127	0.59499	0.810069	0.818287	1.01368	1.17467	0.892332	1.15882	0.154021	0.212655	0.812421	0.880291	0.38341	-0.183947	0.416337	0.759645	0.0376495	-0.396603	1.42424	137	15.373	9.56885	Housekeeping	39S (MT)	33		137
24212391	Q9Y6G3	RM42	39S ribosomal protein L42, mitochondrial	126	2	1.0898	1.06178	0.97631	1.09958	1.14403	1.14234	0.952143	1.10354	1.07944	RM42	0.952597	0.928102	0.853393	0.961142	1	0.99852	0.832269	0.964603	0.94354	1.04263	1.12865	1.04504	1.0825	0.0812757	0.114371	1.09004	1.00231	0.968885	0.00333029	0.0137278	0.92592	0.164253	-0.11104	0.784487	142	16.6503	8.35303	Housekeeping	39S (MT)	34		142
50401603	Q8N983	RM43	39S ribosomal protein L43, mitochondrial	127	9	1.04688	0.964467	0.858732	1.07813	1.19709	1.12323	0.83482	1.00383	0.976258	RM43	0.87452	0.805676	0.717349	0.900627	1	0.9383	0.697374	0.838561	0.815526	0.956692	1.13282	0.938303	1.1841	0.0525345	0.243788	1.27956	0.980778	0.819633	-0.0280008	0.0863807	0.828292	0.0363	-0.271789	1.44009	215	23.4162	8.646	Housekeeping	39S (MT)	35		215
51316917	Q9H9J2	RM44	39S ribosomal protein L44, mitochondrial	128	12	1.10584	0.976896	0.9062	1.07243	1.16594	1.1092	0.86897	0.932993	0.954392	RM44	0.948452	0.83786	0.777226	0.919796	1	0.95133	0.745295	0.800205	0.818559	0.996312	1.11586	0.918785	1.11999	0.137278	0.16348	0.862399	0.922186	0.291313	-0.11687	0.53564	0.823391	0.00621212	-0.28035	2.20676	332	37.5117	8.39697	Housekeeping	39S (MT)	36		332
29611869	Q9BRJ2	RM45	39S ribosomal protein L45, mitochondrial	129	10	1.14345	0.968992	0.849007	1.07763	1.22391	1.07185	0.734275	0.907792	0.984779	RM45	0.934261	0.791721	0.693686	0.880487	1	0.875765	0.599944	0.741717	0.804619	0.987149	1.12447	0.875615	1.1391	0.237341	0.187898	0.624628	0.887014	0.379948	-0.172971	0.420276	0.778695	0.0493797	-0.36087	1.30645	306	35.3281	9.02686	Housekeeping	39S (MT)	37		306
52783325	Q9H2W6	RM46	39S ribosomal protein L46, mitochondrial	130	11	1.09493	1.01707	0.896547	1.10077	1.20999	1.1114	0.775873	1.05366	0.96721	RM46	0.904912	0.840562	0.740957	0.90974	1	0.918526	0.641225	0.870804	0.799356	1.00285	1.14072	0.932248	1.13748	0.110137	0.185842	0.958065	0.9296	0.520438	-0.105318	0.283631	0.817245	0.0794778	-0.29116	1.09975	279	31.6854	7.04932	Housekeeping	39S (MT)	38		279
212276461	Q9HD33	RM47	39S ribosomal protein L47, mitochondrial	131	9	1.01607	0.966047	0.948659	0.960932	1.07189	1.06842	0.922828	0.95939	0.893945	RM47	0.947918	0.901254	0.885032	0.896481	1	0.996764	0.860933	0.895043	0.833988	0.976924	1.03375	0.925388	1.05817	0.244186	0.0815683	0.61228	0.947246	0.13622	-0.0781885	0.86576	0.895176	0.0575983	-0.159757	1.23959	250	29.4319	10.3745	Housekeeping	39S (MT)	39		250
118573683	Q96GC5	RM48	39S ribosomal protein L48, mitochondrial	132	12	1.10923	0.96856	0.883078	1.05484	1.15192	1.07438	0.865979	0.967306	0.958538	RM48	0.962938	0.840822	0.766613	0.915718	1	0.932682	0.751769	0.839733	0.832121	0.986955	1.09371	0.930608	1.10817	0.213778	0.148175	0.670037	0.942908	0.485853	-0.0848115	0.313495	0.850872	0.0205987	-0.232986	1.68616	212	23.9198	8.98291	Housekeeping	39S (MT)	40		212
6093524	Q13405	RM49	39S ribosomal protein L49, mitochondrial	133	8	1.11371	0.961749	0.878005	1.1617	1.23258	1.17623	0.793508	0.980276	0.964243	RM49	0.903562	0.780272	0.71233	0.942496	1	0.954284	0.643777	0.795302	0.782295	0.98449	1.19017	0.912676	1.20892	0.046626	0.273724	1.33137	0.927055	0.475396	-0.109274	0.322944	0.766843	0.0120012	-0.382998	1.92078	166	19.1859	9.45166	Housekeeping	39S (MT)	41		166
118573685	Q8N5N7	RM50	39S ribosomal protein L50, mitochondrial	134	10	1.09261	0.925004	0.924098	0.949084	1.07214	1.0493	0.841489	0.918712	0.951739	RM50	1	0.846599	0.84577	0.868638	0.981262	0.960357	0.770163	0.840841	0.871069	0.980571	1.02351	0.90398	1.04379	0.559722	0.0618256	0.252028	0.921892	0.303011	-0.117331	0.518541	0.883219	0.0749438	-0.179156	1.12526	158	18.3134	7.88428	Housekeeping	39S (MT)	42		158
74762954	Q4U2R6	RM51	39S ribosomal protein L51, mitochondrial	135	1	1.02017	0.903163	0.886926	0.963014	0.999675	1.1424	0.909619	0.979455	0.931505	RM51	0.893009	0.790585	0.776372	0.842975	0.875067	1	0.796236	0.857368	0.815394	0.936754	1.03503	0.940193	1.10491	0.227261	0.14393	0.643475	1.00367	0.944906	0.00528693	0.0246115	0.908373	0.18016	-0.138643	0.744341	128	15.0852	11.2681	Housekeeping	39S (MT)	43		128
124053357	Q86TS9	RM52	39S ribosomal protein L52, mitochondrial	136	2	0.935064	0.947836	0.91418	1.10927	1.04289	0.935999	0.875128	0.878528	0.998218	RM52	0.842952	0.854466	0.824125	1	0.940152	0.843795	0.78892	0.791985	0.899884	0.93236	1.02939	0.917291	1.10407	0.132205	0.142826	0.878753	0.983838	0.735788	-0.0235073	0.133247	0.891105	0.158202	-0.166333	0.800789	123	13.6552	10.2573	Housekeeping	39S (MT)	44		123
74731579	Q96EL3	RM53	39S ribosomal protein L53, mitochondrial	137	6	1.12916	1.08807	0.962683	1.03139	1.13526	1.10072	0.716191	0.964172	0.906949	RM53	0.994627	0.958438	0.847987	0.908507	1	0.969582	0.630863	0.849299	0.798894	1.05997	1.08912	0.862437	1.0275	0.645224	0.0391419	0.190289	0.813643	0.0935667	-0.297533	1.02888	0.791864	0.0487925	-0.336675	1.31165	112	12.0992	8.76318	Housekeeping	39S (MT)	45		112
74737109	Q6P161	RM54	39S ribosomal protein L54, mitochondrial	138	3	1.03649	1.06334	0.963654	1.06659	1.08446	1.13091	0.759584	0.993733	0.943391	RM54	0.916513	0.940248	0.852105	0.943127	0.958926	1	0.671658	0.878703	0.834188	1.02116	1.09399	0.898903	1.07132	0.108905	0.0993846	0.962952	0.880276	0.188167	-0.183973	0.725456	0.821677	0.0571519	-0.283357	1.24297	138	15.8092	9.59814	Housekeeping	39S (MT)	46		138
74750237	Q7Z7F7	RM55	39S ribosomal protein L55, mitochondrial	139	6	1.12622	1.08604	0.959175	1.16562	1.26703	1.32901	0.928948	1.09133	1.07073	RM55	0.847413	0.817181	0.721724	0.87706	0.953368	1	0.69898	0.821164	0.805665	1.05714	1.25388	1.03034	1.18611	0.0469067	0.246233	1.32876	0.974643	0.727442	-0.0370538	0.138202	0.821717	0.0328287	-0.283287	1.48375	128	15.1191	11.1509	Housekeeping	39S (MT) (47)	47		128
24212389	Q9Y399	RT02	28S ribosomal protein S2, mitochondrial	140	14	1.08006	1.04215	0.921546	1.04404	1.14117	1.11437	0.771911	0.982745	0.97762	RT02	0.946455	0.91323	0.807546	0.914886	1	0.976515	0.676421	0.861174	0.856683	1.01459	1.09986	0.910759	1.08405	0.201723	0.116426	0.695244	0.897665	0.285516	-0.155752	0.544369	0.828069	0.0658202	-0.272177	1.18164	296	33.2281	9.26123	Housekeeping	28S (MT)	1		296
24212347	P82675	RT05	28S ribosomal protein S5, mitochondrial	141	9	1.03272	0.953836	0.883477	1.07631	1.14535	1.15615	0.852571	1.03829	1.04164	RT05	0.89324	0.825014	0.764157	0.930948	0.990665	1	0.737425	0.898063	0.90096	0.956676	1.12594	0.977501	1.17693	0.0273653	0.235023	1.5628	1.02177	0.797389	0.0310671	0.0983298	0.868167	0.0920508	-0.203956	1.03597	430	47.9761	9.92041	Housekeeping	28S (MT)	2		430
13959558	P82932	RT06	28S ribosomal protein S6, mitochondrial	142	7	1.12837	0.9794	0.840974	1.07949	1.2481	1.17117	0.775969	0.975316	0.946555	RT06	0.90407	0.784713	0.673804	0.864903	1	0.938364	0.62172	0.781441	0.758397	0.982914	1.16625	0.89928	1.18652	0.129477	0.246742	0.887808	0.914912	0.465223	-0.128296	0.332339	0.771085	0.0278329	-0.375038	1.55544	125	14.2176	9.26123	Housekeeping	28S (MT)	3		125
296452884	Q9Y2R9	RT07	28S ribosomal protein S7, mitochondrial	143	13	1.0766	1.00191	0.976962	1.01491	1.15466	1.01345	0.866278	0.995882	0.971275	RT07	0.932394	0.867711	0.846101	0.878969	1	0.877705	0.750242	0.862486	0.841175	1.01849	1.06101	0.944478	1.04175	0.486907	0.0590036	0.312554	0.927329	0.211058	-0.108846	0.675598	0.890168	0.130635	-0.16785	0.88394	242	28.116	9.99365	Housekeeping	28S (MT)	4		242
218511769	P82933	RT09	28S ribosomal protein S9, mitochondrial	144	25	1.00527	0.979726	0.933212	1.06299	1.13051	1.07667	0.901081	0.985122	0.966061	RT09	0.889224	0.866625	0.825481	0.940274	1	0.952381	0.797059	0.871398	0.854538	0.972737	1.09006	0.950755	1.12061	0.0164244	0.16428	1.78451	0.977401	0.542321	-0.0329769	0.265744	0.872207	0.0131067	-0.197257	1.88251	396	45.8058	9.51025	Housekeeping	28S (MT)	5		396
20140017	P82664	RT10	28S ribosomal protein S10, mitochondrial	145	3	1.20643	0.890413	0.758173	1.0963	1.21973	1.31915	0.711343	1.03899	1.00849	RT10	0.914547	0.674988	0.574742	0.831063	0.924632	1	0.539242	0.787616	0.764497	0.951671	1.21173	0.919606	1.27326	0.153248	0.348531	0.814605	0.966307	0.858861	-0.0494469	0.0660774	0.758921	0.0760576	-0.397978	1.11886	201	22.985	8.00146	Housekeeping	28S (MT)	6		201
21263985	P82912	RT11	28S ribosomal protein S11, mitochondrial	146	2	0.932953	0.846061	0.86311	1.03204	1.05664	1.02671	0.781303	0.893769	0.925545	RT11	0.882944	0.80071	0.816845	0.976724	1	0.971678	0.739423	0.84586	0.875933	0.880708	1.03846	0.866872	1.17912	0.00496881	0.237716	2.30375	0.98429	0.800344	-0.0228448	0.0967235	0.834763	0.0185023	-0.260561	1.73278	194	20.6029	10.814	Housekeeping	28S (MT)	7		194
3024582	O15235	RT12	28S ribosomal protein S12, mitochondrial	147	4	1.0643	1.06757	1.00098	1.00659	0.983314	0.987356	0.869973	1.01536	1.00886	RT12	0.996938	1	0.937623	0.942884	0.921079	0.924865	0.814912	0.9511	0.945004	1.04428	0.992421	0.964731	0.950339	0.085595	-0.0734857	1.06755	0.923823	0.201742	-0.114311	0.695203	0.972099	0.594615	-0.0408255	0.225764	138	15.163	10.2866	Housekeeping	28S (MT)	8		138
41017845	O60783	RT14	28S ribosomal protein S14, mitochondrial	148	3	0.991053	1.04042	0.929203	1.14039	1.30962	1.22462	0.864214	1.09449	1.01845	RT14	0.75675	0.794446	0.709522	0.870782	1	0.9351	0.659898	0.835735	0.77767	0.986892	1.22488	0.992386	1.24115	0.0152412	0.311674	1.81698	1.00557	0.94512	0.00800863	0.024513	0.810192	0.0496294	-0.303665	1.30426	128	15.129	11.4146	Housekeeping	28S (MT)	9		128
13633907	P82914	RT15	28S ribosomal protein S15, mitochondrial	149	10	1.12015	0.966846	0.853995	1.07415	1.13404	1.10685	0.786182	0.975846	0.945432	RT15	0.987746	0.852567	0.753054	0.947188	1	0.976021	0.693257	0.860503	0.833683	0.980329	1.10501	0.902487	1.12719	0.189843	0.172727	0.721604	0.920596	0.467198	-0.11936	0.330499	0.81672	0.0298353	-0.292087	1.52527	257	29.8234	10.4771	Housekeeping	28S (MT)	10		257
13633952	Q9Y3D3	RT16	28S ribosomal protein S16, mitochondrial	150	7	1.09709	1.00117	0.92266	1.16374	0.935071	1.08641	0.900875	0.902167	0.959317	RT16	0.942728	0.860302	0.792841	1	0.803506	0.933553	0.774122	0.775232	0.824341	1.00697	1.06174	0.920787	1.05439	0.549895	0.076408	0.25972	0.914412	0.185668	-0.129084	0.731262	0.867243	0.113813	-0.205492	0.943808	137	15.335	9.49561	Housekeeping	28S (MT)	11		137
13633951	Q9Y2R5	RT17	28S ribosomal protein S17, mitochondrial	151	2	0.981695	0.88708	0.76869	1.03055	1.19985	1.13523	0.715191	0.899512	0.882598	RT17	0.818183	0.739327	0.640657	0.858899	1	0.946146	0.596068	0.749689	0.735592	0.879155	1.12187	0.832433	1.27608	0.0371054	0.351723	1.43056	0.946856	0.612552	-0.0787827	0.212857	0.742002	0.0195992	-0.430505	1.70776	130	14.4929	9.84717	Housekeeping	28S (MT)	12		130
24212201	Q9NVS2	RT18A	28S ribosomal protein S18a, mitochondrial	152	12	1.09348	1.03668	0.93957	1.04984	1.12003	1.06955	0.770834	0.961956	0.963999	RT18A	0.976301	0.925583	0.838882	0.937335	1	0.954936	0.688228	0.858868	0.860692	1.02324	1.07981	0.898929	1.05528	0.317414	0.0776236	0.498374	0.878509	0.187291	-0.186871	0.727484	0.832491	0.0549606	-0.264494	1.25995	196	22.1698	10.3306	Housekeeping	28S (MT)	13		196
24212203	Q9Y676	RT18B	28S ribosomal protein S18b, mitochondrial	153	8	1.07624	0.940058	0.901257	0.993545	1.03118	1.06437	0.939079	0.990053	1.0272	RT18B	1	0.873464	0.837411	0.923162	0.958127	0.988968	0.872554	0.919917	0.95443	0.972519	1.0297	0.985443	1.05879	0.371543	0.0824215	0.429991	1.01329	0.837017	0.0190466	0.0772657	0.957023	0.247681	-0.0633749	0.606107	258	29.377	9.37842	Housekeeping	28S (MT)	14		258
13959554	P82921	RT21	28S ribosomal protein S21, mitochondrial	154	5	0.988556	0.892943	0.885415	1.10503	1.28567	1.17498	0.725535	0.893831	0.903589	RT21	0.768902	0.694533	0.688678	0.859499	1	0.913907	0.564323	0.695224	0.702814	0.922305	1.18856	0.840985	1.28869	0.0128319	0.365905	1.89171	0.91183	0.289437	-0.133163	0.538446	0.707564	0.0112612	-0.499068	1.94842	87	10.7345	10.2134	Housekeeping	28S (MT)	16		87
13633893	P82650	RT22	28S ribosomal protein S22, mitochondrial	155	11	1.07194	0.952175	0.871735	1.06311	1.17271	1.10327	0.768332	0.910562	0.979661	RT22	0.914074	0.811944	0.743351	0.906538	1	0.940783	0.655176	0.77646	0.835382	0.965285	1.11303	0.886185	1.15306	0.090087	0.205462	1.04534	0.918055	0.405587	-0.123347	0.391916	0.796194	0.0316079	-0.328809	1.5002	360	41.2544	7.89893	Housekeeping	28S (MT)	17		360
31077184	Q9Y3D9	RT23	28S ribosomal protein S23, mitochondrial	156	8	1.06482	0.940708	0.807726	1.07536	1.19391	1.12885	0.741095	0.925825	0.958051	RT23	0.89188	0.787924	0.676539	0.900707	1	0.945509	0.62073	0.775457	0.80245	0.937752	1.13271	0.87499	1.2079	0.075629	0.272495	1.12131	0.933072	0.565763	-0.09994	0.247365	0.772477	0.0272618	-0.372435	1.56445	190	21.7573	8.89502	Housekeeping	28S (MT)	18		190
74731578	Q96EL2	RT24	28S ribosomal protein S24, mitochondrial	157	2	0.922778	0.84685	0.778926	0.98362	1.10233	1.05178	0.995931	0.963698	0.958282	RT24	0.837113	0.768233	0.706615	0.892306	1	0.95414	0.903474	0.874234	0.86932	0.849518	1.04591	0.972637	1.23118	0.0219428	0.300045	1.65871	1.14493	0.0463286	0.195256	1.33415	0.929941	0.114021	-0.104789	0.943016	167	19.0029	9.37842	Housekeeping	28S (MT)	19		167
13633894	P82663	RT25	28S ribosomal protein S25, mitochondrial	158	5	0.984637	0.963142	0.871028	0.968518	1.11434	0.986183	0.810827	0.998803	0.931151	RT25	0.883603	0.864313	0.781651	0.869138	1	0.88499	0.727627	0.896315	0.835605	0.939602	1.02301	0.913594	1.08877	0.221584	0.122705	0.654462	0.972319	0.709853	-0.0404977	0.148832	0.89304	0.201403	-0.163203	0.695934	173	20.1033	8.82178	Housekeeping	28S (MT)	20		173
28201886	Q9BYN8	RT26	28S ribosomal protein S26, mitochondrial	159	13	0.970279	0.945675	0.901153	1.03977	1.09226	1.06921	0.95315	0.975882	1.03038	RT26	0.888319	0.865794	0.825032	0.951937	1	0.978891	0.872637	0.893449	0.943343	0.939036	1.06708	0.98647	1.13636	0.00717396	0.184415	2.14424	1.05051	0.195639	0.0710957	0.708543	0.924458	0.0427284	-0.11332	1.36928	205	24.1969	10.3892	Housekeeping	28S (MT)	21		205
209572725	Q92552	RT27	28S ribosomal protein S27, mitochondrial	160	11	1.11557	1.0295	0.831569	1.05926	1.17237	1.10414	0.678012	0.947653	0.91911	RT27	0.951545	0.878132	0.709304	0.90352	1	0.9418	0.578324	0.80832	0.783973	0.992211	1.11193	0.848258	1.12065	0.255471	0.164341	0.592658	0.854917	0.296235	-0.226144	0.528363	0.762873	0.0451182	-0.390485	1.34565	414	47.5814	6.17627	Housekeeping	28S (MT)	22		414
22001973	Q9Y2Q9	RT28	28S ribosomal protein S28, mitochondrial	161	5	1.10597	1.01446	0.909649	1.1297	1.02374	1.07752	0.970352	0.929141	0.957691	RT28	0.97899	0.89799	0.805211	1	0.906199	0.953805	0.858944	0.822464	0.847737	1.01003	1.07699	0.952394	1.06629	0.357446	0.0926055	0.44679	0.94294	0.376713	-0.0847618	0.42399	0.884315	0.019377	-0.177367	1.71271	187	20.8298	9.1001	Housekeeping	28S (MT)	23		187
1706299	P51398	RT29	28S ribosomal protein S29, mitochondrial	162	20	1.11954	0.964487	0.892923	1.01353	1.12631	1.11744	0.78887	0.925569	0.921891	RT29	0.993987	0.856326	0.792787	0.899869	1	0.99213	0.700403	0.821772	0.818507	0.992315	1.08576	0.878777	1.09417	0.286525	0.129836	0.542838	0.885582	0.231673	-0.175302	0.635125	0.809364	0.0230572	-0.305139	1.63719	398	45.5376	8.88037	Housekeeping	28S (MT)	24		398
116242771	Q9NP92	RT30	28S ribosomal protein S30, mitochondrial	163	6	1.02997	0.965673	0.872939	1.01387	1.07304	1.04057	0.885049	0.914134	0.920936	RT30	0.959861	0.899939	0.813518	0.944852	1	0.969742	0.824804	0.851908	0.858248	0.956195	1.04249	0.906706	1.09025	0.15097	0.124664	0.82111	0.948245	0.35075	-0.0766686	0.455002	0.869747	0.00261844	-0.201333	2.58196	439	50.3328	7.97217	Housekeeping	28S (MT)	25		439
93186129	Q92665	RT31	28S ribosomal protein S31, mitochondrial	164	15	1.0582	1.00335	0.885642	1.04552	1.11476	1.17187	0.788777	0.944103	0.987069	RT31	0.903003	0.856197	0.755754	0.892181	0.951265	1	0.673095	0.805641	0.842306	0.982396	1.11071	0.90665	1.13062	0.109937	0.177108	0.958857	0.922896	0.391169	-0.11576	0.407635	0.816278	0.0442519	-0.292868	1.35407	395	45.2905	9.29053	Housekeeping	28S (MT)	26		395
24212388	Q9Y291	RT33	28S ribosomal protein S33, mitochondrial	165	4	1.15026	1.01528	0.929944	1.22737	1.22671	1.25717	0.875903	1.05023	1.0153	RT33	0.914954	0.807592	0.73971	0.976291	0.975767	1	0.696724	0.835389	0.807607	1.03183	1.23708	0.980478	1.19892	0.0341241	0.26174	1.46694	0.950234	0.571219	-0.0736453	0.243198	0.792572	0.00906888	-0.335385	2.04245	106	12.6207	10.1108	Housekeeping	28S (MT)	27		106
24212369	P82930	RT34	28S ribosomal protein S34, mitochondrial	166	4	0.990621	0.899012	0.923507	1.02097	0.94782	0.98859	0.885494	0.916512	0.92934	RT34	0.970277	0.88055	0.904541	1	0.928356	0.968288	0.867309	0.89769	0.910255	0.937713	0.985792	0.910448	1.05127	0.23708	0.0721371	0.625105	0.970924	0.419348	-0.0425691	0.377426	0.92357	0.0386784	-0.114706	1.41253	218	25.6345	9.979	Housekeeping	28S (MT)	28		218
74708095	P82673	RT35	28S ribosomal protein S35, mitochondrial	167	7	1.03076	0.935135	0.897411	1.08874	1.17987	1.08219	0.779251	1.0617	1.08711	RT35	0.873619	0.792573	0.7606	0.922765	1	0.917209	0.660453	0.89984	0.921378	0.954435	1.11694	0.976019	1.17026	0.0327068	0.226827	1.48536	1.02261	0.849067	0.0322616	0.0710582	0.873836	0.245268	-0.194565	0.610359	323	36.8211	8.23584	Housekeeping	28S (MT)	29		323
41688617	P82909	RT36	28S ribosomal protein S36, mitochondrial	168	4	1.01098	0.903437	0.822725	1.20502	1.31018	1.21383	0.811224	0.928379	0.955399	RT36	0.771636	0.689554	0.62795	0.919736	1	0.926461	0.619171	0.70859	0.729214	0.912381	1.24301	0.898334	1.36238	0.00670414	0.446127	2.17366	0.984604	0.851215	-0.0223838	0.0699608	0.72271	0.00344537	-0.468511	2.46276	103	11.459	9.99365	Housekeeping	28S (MT)(30)	30		103
257051064	Q96EE3	SEH1	Nucleoporin SEH1	169	9	1.03331	1.08588	1.04592	1.005	1.03037	0.947605	0.981624	0.961916	1.00945	SEH1	0.951586	1	0.963197	0.92551	0.948874	0.872657	0.903985	0.885836	0.929608	1.05504	0.994323	0.984329	0.942451	0.105775	-0.0855101	0.975616	0.932978	0.0281375	-0.100084	1.55071	0.989949	0.74002	-0.0145743	0.130756	360	39.6234	8.08936	Housekeeping	hNPC -coat	1		360
74733394	Q9BW27	NUP85	Nuclear pore complex protein Nup85	170	11	1.06836	1.07281	1.04828	1.00331	0.958142	0.934202	0.857717	0.94296	1.01113	NUP85	0.995848	1	0.977133	0.935217	0.893111	0.870796	0.799501	0.878959	0.942499	1.06315	0.96522	0.937268	0.907884	0.0105818	-0.13942	1.97544	0.881593	0.0489825	-0.181815	1.30996	0.971041	0.597336	-0.0423958	0.223781	656	74.9711	5.5542	Housekeeping	hNPC -coat	2		656
238054372	Q12769	NU160	Nuclear pore complex protein Nup160	171	14	1.06853	1.11669	1.08098	0.985144	0.998561	0.942203	0.902977	0.983069	1.07276	NU160	0.956872	1	0.968021	0.882197	0.894212	0.843743	0.808616	0.880338	0.960658	1.08874	0.975303	0.986269	0.895811	0.00704566	-0.158734	2.15208	0.905884	0.115519	-0.142602	0.937346	1.01124	0.842987	0.0161311	0.074179	1436	162.017	5.50342	Housekeeping	hNPC -coat	3		1436
50403748	P55735	SEC13	Protein SEC13 homolog	172	44	0.882608	0.949417	1.06423	0.916548	0.824055	0.887823	1.00261	1.10648	1.10436	SEC13	0.797675	0.858056	0.961818	0.828349	0.744757	0.802389	0.906134	1	0.998085	0.965418	0.876142	1.07115	0.907526	0.208911	-0.139988	0.680039	1.10952	0.169365	0.149934	0.771176	1.22257	0.0112596	0.289922	1.94848	322	35.5181	5.47803	Housekeeping	hNPC -coat	4		322
12230339	P57740	NU107	Nuclear pore complex protein Nup107	173	17	1.06378	1.02881	1.01516	1.02858	1.05814	1.02962	0.965646	1.00192	1.03299	NU107	1	0.967124	0.954289	0.966903	0.994694	0.967888	0.907746	0.941842	0.971048	1.03592	1.03878	1.00018	1.00276	0.877452	0.00398089	0.0567768	0.965504	0.214668	-0.0506458	0.668233	0.962844	0.150423	-0.0546267	0.822686	925	106.307	5.42725	Housekeeping	hNPC -coat	5		925
143811430	Q8WUM0	NU133	Nuclear pore complex protein Nup133	174	16	1.0106	1.06822	0.923285	0.962038	0.973492	1.01557	0.921007	1.04341	0.943328	NU133	0.946056	1	0.864317	0.900596	0.911318	0.950708	0.862185	0.976775	0.88308	1.0007	0.9837	0.96925	0.983009	0.725696	-0.0247235	0.139246	0.968569	0.607384	-0.0460734	0.216537	0.98531	0.742326	-0.0213499	0.129405	1156	128.898	5.09717	Housekeeping	hNPC -coat	6		1156
27923820	Q8NFH4	NUP37	Nucleoporin Nup37	175	11	1.01971	1.04164	1.08857	0.967422	0.998365	0.954961	0.893629	1.01747	1.0296	NUP37	0.936739	0.956886	1	0.888709	0.917135	0.877262	0.82092	0.934685	0.945829	1.04997	0.973583	0.980233	0.927247	0.0337121	-0.108974	1.47221	0.933581	0.219578	-0.0991525	0.658411	1.00683	0.890432	0.00982127	0.0503993	326	36.684	5.92236	Housekeeping	hNPC -coat	7		326
27923819	Q8NFH3	NUP43	Nucleoporin Nup43	176	3	0.996996	1.07188	1.01587	0.964945	1.1024	1.02085	0.865873	0.980753	0.939263	NUP43	0.904385	0.97231	0.921504	0.875311	1	0.926024	0.785442	0.889651	0.852016	1.02825	1.0294	0.92863	1.00112	0.981139	0.00161561	0.00826948	0.903119	0.069342	-0.147011	1.159	0.902109	0.125547	-0.148627	0.901195	380	42.1245	5.63037	Housekeeping	hNPC -coat	8		380
116242684	Q8N1F7	NUP93	Nuclear pore complex protein Nup93	177	46	1.09383	1.11924	1.10741	0.946235	0.938087	0.95098	0.894202	0.989459	0.972816	NUP93	0.977295	1	0.98943	0.845424	0.838145	0.849663	0.798935	0.884043	0.869173	1.10683	0.945101	0.952159	0.853882	3.9944e-05	-0.227892	4.39855	0.860259	0.006942	-0.217158	2.15852	1.00747	0.82333	0.0107344	0.0844262	819	93.4296	5.71924	Housekeeping	hNPC-adaptor	9		819
296439283	Q92621	NU205	Nuclear pore complex protein Nup205	178	37	1.12747	1.13356	0.997946	0.934077	1.01514	0.94709	0.874285	0.952853	0.916741	NU205	0.994636	1	0.880368	0.824024	0.895535	0.835504	0.771277	0.840588	0.808731	1.08633	0.965435	0.914626	0.888716	0.0762735	-0.170205	1.11763	0.841945	0.0259634	-0.248202	1.58564	0.947372	0.207985	-0.0779966	0.681968	2012	227.776	6.18896	Housekeeping	hNPC-adaptor	10		2012
74743623	Q5SRE5	NU188	Nucleoporin NUP188 homolog	179	10	1.0486	1.0505	1.03393	0.928885	0.980175	0.848674	0.871374	0.90769	0.90451	NU188	0.998188	1	0.984221	0.884228	0.933052	0.807873	0.829481	0.864051	0.861024	1.04435	0.919245	0.894525	0.880212	0.0317028	-0.184077	1.4989	0.856541	0.000298971	-0.223405	3.52437	0.973108	0.569922	-0.0393277	0.244184	1749	195.917	6.72705	Housekeeping	hNPC-adaptor	11		1749
6093462	O75694	NU155	Nuclear pore complex protein Nup155	180	30	1.05345	1.01533	0.958695	0.980549	1.02989	0.980661	0.87526	0.950456	0.966758	NU155	1	0.963811	0.910049	0.930795	0.977632	0.930901	0.830848	0.902228	0.917704	1.00916	0.997033	0.930825	0.987984	0.724453	-0.0174405	0.13999	0.922376	0.117645	-0.116573	0.929428	0.933594	0.112231	-0.0991322	0.949889	1391	155.1	6.16357	Housekeeping	hNPC-adaptor	12		1391
74730292	Q8NFH5	NUP53	Nucleoporin NUP53	181	8	1.07183	1.13933	1.18066	0.927048	0.940847	0.937288	0.913178	0.951916	0.966527	NUP53	0.907818	0.964997	1	0.785194	0.796882	0.793868	0.773447	0.806257	0.818632	1.13061	0.935061	0.943874	0.827044	0.00362541	-0.273965	2.44064	0.834838	0.00624737	-0.260431	2.2043	1.00942	0.620449	0.0135336	0.207294	326	34.7515	9.08545	Housekeeping	hNPC-adaptor	13		326
134047855	P37198	NUP62	Nuclear pore glycoprotein p62	182	10	1.1243	1.02034	1.03752	0.964743	0.945226	0.997011	0.934541	1.00213	0.969177	NUP62	1	0.907536	0.922812	0.858083	0.840724	0.886784	0.83122	0.891335	0.862027	1.06072	0.968993	0.968615	0.913524	0.0612714	-0.130485	1.21274	0.913168	0.070618	-0.131048	1.15108	0.99961	0.988508	-0.000563021	0.00502	522	53.2225	5.31299	Housekeeping	hNPC-channel	14		522
38257923	Q7Z3B4	NUP54	Nucleoporin p54	183	13	1.11852	1.05921	1.04188	0.990984	0.981459	0.972722	0.894008	0.959597	1.02468	NUP54	1	0.946973	0.931479	0.885974	0.877459	0.869648	0.799274	0.857913	0.916099	1.07321	0.981722	0.959428	0.914756	0.0183891	-0.128541	1.73544	0.893983	0.0620383	-0.161681	1.20734	0.977291	0.589762	-0.0331398	0.229323	507	55.4014	7.02002	Housekeeping	hNPC-channel	15		507
44888845	Q9BVL2	NUPL1	Nucleoporin p58/p45	184	8	1.15204	1.11352	1.13569	1.04332	1.06078	0.961617	0.995057	1.022	1.05759	NUPL1	1	0.966564	0.985805	0.90563	0.920786	0.83471	0.863736	0.88712	0.918012	1.13375	1.02191	1.02488	0.901352	0.0263578	-0.149837	1.57909	0.903975	0.00689545	-0.145645	2.16144	1.00291	0.937316	0.00419165	0.0281138	599	60.8597	9.33447	Housekeeping	hNPC-channel	16		599
83305554	P49792	RBP2	E3 SUMO-protein ligase RanBP2	185	110	1.10093	1.15002	1.08316	0.984102	0.961533	0.935301	0.890449	0.896989	0.878454	RBP2	0.957316	1	0.941862	0.855724	0.836099	0.81329	0.774288	0.779976	0.763858	1.11137	0.960312	0.88863	0.864077	0.00349488	-0.210768	2.45657	0.799579	0.000424285	-0.322688	3.37234	0.925356	0.00900916	-0.11192	2.04532	3224	357.974	6.20166	Housekeeping	hNPC-cyto filaments	17		3224	Protein modification
25008854	Q99567	NUP88	Nuclear pore complex protein Nup88	186	27	1.12356	1.11109	1.08171	0.997243	0.982945	0.959991	0.933027	1.04028	0.981625	NUP88	1	0.988905	0.962758	0.887578	0.874853	0.854422	0.830424	0.925886	0.873678	1.10545	0.980059	0.984979	0.886569	0.00160106	-0.173695	2.79559	0.891019	0.022609	-0.166472	1.64572	1.00502	0.888216	0.00722309	0.0514814	741	83.4888	5.69385	Housekeeping	hNPC-cyto filaments	18		741
205831380	P35658	NU214	Nuclear pore complex protein Nup214	187	27	1.0358	1.07914	1.12283	0.938647	0.894136	0.922364	0.897715	0.954556	0.98814	NU214	0.922494	0.961088	1	0.835964	0.796322	0.821463	0.799511	0.850134	0.880043	1.07926	0.918382	0.946804	0.850938	0.00472039	-0.232874	2.32602	0.877273	0.0220557	-0.188903	1.65648	1.03095	0.388703	0.0439709	0.410382	2090	213.488	7.47412	Housekeeping	hNPC-cyto filaments	19		2090
3122666	P78406	RAE1L	mRNA export factor	188	23	1.07935	1.05683	1.05823	0.949177	0.981507	0.930758	0.933583	0.965572	1.0017	RAE1L	1	0.979139	0.980439	0.879399	0.909352	0.862334	0.864951	0.894589	0.928064	1.0648	0.953814	0.966953	0.895765	0.00255778	-0.158808	2.59214	0.908104	0.00956282	-0.139071	2.01941	1.01377	0.622146	0.019737	0.206108	368	40.9419	7.82568	Housekeeping	hNPC-cyto filaments	21		368
308153660	P52948	NUP98	Nuclear pore complex protein Nup98-Nup96	189	44	1.06249	1.10444	1.02575	1.01339	0.950498	0.927664	0.890714	0.934171	0.951162	NUP98	0.962016	1	0.928746	0.917561	0.860614	0.839939	0.806483	0.845831	0.861215	1.06423	0.963852	0.925349	0.905683	0.0428303	-0.142921	1.36825	0.869504	0.00871506	-0.201735	2.05973	0.960053	0.286324	-0.0588138	0.543142	1817	197.457	6.40479	Housekeeping	hNPC-cyto filaments	22		1817
97180263	Q9BTX1	NDC1	Nucleoporin NDC1	190	8	1.05824	1.04552	1.02567	0.983137	1.04482	1.00792	0.878378	0.938042	0.920109	NDC1	1	0.987984	0.969221	0.929031	0.98732	0.952452	0.830038	0.886418	0.869473	1.04314	1.01196	0.912176	0.970106	0.198816	-0.0437856	0.701548	0.87445	0.00284053	-0.193552	2.5466	0.901396	0.0166169	-0.149767	1.77945	674	76.2554	9.08545	Housekeeping	hNPC- POMs	23		674
205829304	A8CG34	P121C	Nuclear envelope pore membrane protein POM 121C	191	5	1.10728	1.35872	1.21005	0.998233	0.907786	0.989396	0.959238	0.943679	1.04686	P121C	0.814939	1	0.890582	0.734685	0.668117	0.72818	0.705984	0.694533	0.770471	1.22535	0.965138	0.983258	0.787642	0.0294754	-0.344389	1.53054	0.802429	0.0385532	-0.317555	1.41394	1.01877	0.69599	0.026834	0.157397	1229	124.982	10.3745	Housekeeping	hNPC- POMs	27		1229
83288218	Q53GS7	GLE1	Nucleoporin GLE1	192	2	1.2807	1.09422	1.10715	0.943399	0.971862	0.928193	0.773719	0.854252	0.972758	GLE1	1	0.854391	0.864488	0.736629	0.758853	0.724756	0.604138	0.667021	0.759553	1.16069	0.947818	0.86691	0.816601	0.0257455	-0.292298	1.5893	0.746893	0.0243971	-0.421026	1.61266	0.914637	0.243534	-0.128728	0.613441	698	79.7856	7.43018	Housekeeping	hNPC -mRNA export	28		698
73919226	Q9NUU7	DD19A	ATP-dependent RNA helicase DDX19A	193	34	0.748997	0.935045	1.08111	0.859414	0.767245	0.780964	1.00327	1.14672	1.03577	DD19A	0.653164	0.815408	0.942783	0.749453	0.669078	0.681041	0.874907	1	0.903246	0.921717	0.802541	1.06192	0.870702	0.300487	-0.199749	0.522175	1.15211	0.254447	0.204282	0.594403	1.3232	0.00758371	0.40403	2.12012	478	53.9408	6.58057	Housekeeping	hNPC -mRNA export	29		478
10719979	Q9UMR2	DD19B	ATP-dependent RNA helicase DDX19B	194	33	0.783561	0.917032	0.986875	0.869015	0.927538	0.877122	1.10836	1.0472	1.05902	DD19B	0.706956	0.827378	0.890393	0.784056	0.836856	0.79137	1	0.944824	0.955489	0.895823	0.891225	1.07153	0.994868	0.94479	-0.00742364	0.0246645	1.19614	0.0482824	0.258386	1.31621	1.20231	0.00233282	0.26581	2.63212	479	53.8928	6.30322	Housekeeping	hNPC -mRNA export	30		479
20139282	Q9UBU9	NXF1	Nuclear RNA export factor 1	195	10	1.15608	1.12282	1.14719	0.984529	1.02232	0.973347	0.906198	0.880358	0.901807	NXF1	1	0.971228	0.992309	0.851611	0.884299	0.841939	0.783855	0.761504	0.780057	1.14203	0.993398	0.896121	0.869856	0.00113507	-0.201152	2.94498	0.784676	4.26044e-05	-0.349831	4.37055	0.902076	0.00445024	-0.148679	2.35162	619	70.1387	8.51416	Housekeeping	hNPC -mRNA export	31		619
20137527	Q9NRG9	AAAS	Aladin	196	4	1.13823	1.0754	1.02124	0.957366	0.945954	0.931349	0.850733	0.909116	0.884047	AAAS	1	0.944806	0.897222	0.841104	0.831077	0.818246	0.74742	0.798714	0.776689	1.07829	0.944889	0.881299	0.876285	0.018269	-0.190527	1.73829	0.817312	0.00646258	-0.291042	2.18959	0.9327	0.0264048	-0.100514	1.57832	546	59.5363	7.50342	Housekeeping	hNPC-nuclear basket	35		546
20455193	Q9UKX7	NUP50	Nuclear pore complex protein Nup50	197	8	1.176	1.34853	1.25921	0.850491	0.912223	0.820719	0.705198	0.76155	0.768066	NUP50	0.872064	1	0.933769	0.630681	0.676458	0.608604	0.522939	0.564727	0.569559	1.26125	0.861144	0.744938	0.682772	0.00211797	-0.550525	2.67408	0.590636	0.000652517	-0.759659	3.18541	0.865056	0.0256907	-0.209135	1.59022	468	50.1132	7.06396	Housekeeping	hNPC-nuclear basket	36		468
206729891	P49790	NU153	Nuclear pore complex protein Nup153	198	18	0.932932	1.23997	1.24209	0.981159	0.867866	0.89975	0.923144	0.918699	0.879745	NU153	0.751101	0.998297	1	0.789928	0.698716	0.724386	0.74322	0.739642	0.70828	1.13833	0.916258	0.907196	0.804914	0.109149	-0.313093	0.961981	0.796953	0.0895555	-0.327433	1.04791	0.990109	0.815841	-0.01434	0.0883943	1475	153.843	8.73389	Housekeeping	hNPC-nuclear basket	37		1475
215274208	P12270	TPR	Nucleoprotein TPR	199	145	1.13872	1.06198	0.996416	0.974208	1.01844	0.984706	0.819324	0.948581	0.976706	TPR	1	0.932608	0.875034	0.855531	0.894379	0.864751	0.719515	0.833026	0.857725	1.0657	0.992453	0.91487	0.931266	0.165445	-0.102735	0.781348	0.858466	0.0765451	-0.220167	1.11608	0.921828	0.19757	-0.117431	0.70428	2363	267.131	5.021	Housekeeping	hNPC-nuclear basket	38		2363
51338598	P62826	RAN	GTP-binding nuclear protein Ran	200	59	0.925162	1.05781	1.4181	0.865873	0.776098	0.773217	0.9776	1.00015	1.04056	RAN	0.652396	0.745937	1	0.610587	0.54728	0.545249	0.689373	0.705276	0.733771	1.13369	0.805062	1.0061	0.710125	0.0941794	-0.493855	1.02604	0.887458	0.438448	-0.172248	0.358082	1.24972	0.00482178	0.321606	2.31679	216	24.4076	7.48877	Housekeeping	RAN-hNPC	39		216
1172922	P46060	RAGP1	Ran GTPase-activating protein 1	201	71	0.964734	1.1181	1.3065	0.869842	0.863965	0.857293	0.88086	1.04672	1.00182	RAGP1	0.738409	0.855796	1	0.665778	0.66128	0.656174	0.674212	0.80116	0.766796	1.12978	0.8637	0.976467	0.764486	0.0546354	-0.387439	1.26253	0.864299	0.237774	-0.210398	0.623835	1.13056	0.0856607	0.177041	1.06722	587	63.5023	4.67822	Housekeeping	RAN-hNPC	40		587
1172837	P43487	RANG	Ran-specific GTPase-activating protein	202	44	0.892242	1.09139	1.49135	0.814474	0.69122	0.756246	0.895291	1.08329	1.05118	RANG	0.598279	0.731816	1	0.546133	0.463487	0.507089	0.600324	0.726381	0.704853	1.15833	0.75398	1.00992	0.650921	0.0876527	-0.619445	1.05723	0.871878	0.468453	-0.197803	0.329334	1.33945	0.0198074	0.421642	1.70317	201	23.2956	5.2876	Housekeeping	RAN-hNPC	41		201
51316528	Q9H6Z4	RANB3	Ran-binding protein 3	203	14	1.12579	1.0559	1.11883	0.962652	0.951489	0.932643	0.84561	0.902724	0.903123	RANB3	1	0.937919	0.99382	0.85509	0.845173	0.828433	0.751125	0.801857	0.802212	1.10018	0.948928	0.883819	0.862524	0.00318662	-0.213363	2.49667	0.803344	0.0017955	-0.315911	2.74581	0.931387	0.0362898	-0.102548	1.44022	567	60.1732	4.77979	Housekeeping	NPC (42)	42		567
121897	P07305	H10	Histone H1.0	204	23	1.13456	0.934253	0.92464	1.06864	1.15815	1.09666	0.731715	0.931366	0.97818	H10	0.979628	0.806678	0.798377	0.922714	1	0.946905	0.631797	0.804184	0.844606	0.997816	1.10782	0.88042	1.11024	0.208106	0.150873	0.681715	0.882347	0.313653	-0.180582	0.50355	0.794735	0.0468535	-0.331454	1.32926	194	20.8502	10.8433	Housekeeping	Histones	1		194
121919	P10412	H14	Histone H1.4	205	105	2.05326	1.52505	1.32713	0.751643	0.828932	0.809104	0.73114	0.881885	0.734399	H14	1	0.742747	0.646351	0.366073	0.403715	0.394059	0.356088	0.429505	0.357675	1.63515	0.79656	0.782475	0.487149	0.0183427	-1.03756	1.73654	0.478535	0.0185423	-1.0633	1.73184	0.982318	0.81001	-0.0257385	0.0915099	219	21.852	11.0337	Housekeeping	Histones	2		219
121992	P16104	H2AX	Histone H2AX	211	293	1.26555	1.11928	1.13615	0.923384	0.874466	0.909655	0.735652	0.923754	0.907066	H2AX	1	0.884416	0.897745	0.729628	0.690974	0.71878	0.581288	0.72992	0.716734	1.17366	0.902501	0.855491	0.768964	0.0050019	-0.379012	2.30087	0.728909	0.013735	-0.456189	1.86217	0.947911	0.48956	-0.077177	0.310194	143	15.1354	10.7407	Housekeeping	Histones	8		143
12643341	Q93077	H2A1C	Histone H2A type 1-C	212	367	1.24676	1.21477	1.30021	1.06613	1.04986	0.939693	0.688222	0.857786	1.07968	H2A1C	0.958893	0.934293	1	0.819968	0.80746	0.722726	0.529318	0.659731	0.830394	1.25391	1.01856	0.87523	0.812307	0.00738622	-0.299904	2.13158	0.698	0.030989	-0.518701	1.50879	0.859281	0.298635	-0.218798	0.52486	130	14.0969	11.0483	Housekeeping	Histones	11		130
121978	P20671	H2A1D	Histone H2A type 1-D	213	388	1.62664	1.31985	1.41861	1.08824	0.952336	1.13382	0.734522	0.925353	1.05556	H2A1D	1	0.811397	0.87211	0.66901	0.585462	0.697034	0.451558	0.568874	0.648922	1.45503	1.05813	0.905145	0.727223	0.0197858	-0.459531	1.70365	0.622079	0.0133255	-0.684829	1.87532	0.855418	0.229538	-0.225298	0.639145	130	14.0989	10.9019	Housekeeping	Histones	12		130
47117890	Q16777	H2A2C	Histone H2A type 2-C	215	378	0.865644	1.01391	1.03177	0.976389	0.968981	0.914999	1.00746	0.912324	0.959561	H2A2C	0.838985	0.98269	1	0.94632	0.939141	0.88682	0.97643	0.884229	0.930011	0.970444	0.953456	0.95978	0.982495	0.777108	-0.0254784	0.109519	0.989011	0.866217	-0.015941	0.0623731	1.00663	0.859842	0.00953739	0.0655812	129	13.9798	10.9019	Housekeeping	Histones	16		129
55977055	P68431	H31	Histone H3.1	218	293	1.40188	1.25418	1.27367	0.888931	1.04041	0.827905	0.812156	0.904243	0.938212	H31	1	0.894644	0.908547	0.634101	0.742155	0.59057	0.579335	0.645024	0.669255	1.30991	0.919082	0.88487	0.701638	0.00754847	-0.511201	2.12214	0.675521	0.00205725	-0.565928	2.68671	0.962777	0.665988	-0.0547271	0.176534	136	15.3945	11.1216	Housekeeping	Histones	43		136
55977062	P84243	H33	Histone H3.3	219	280	1.3242	1.14825	1.06738	0.884404	0.921277	0.897853	0.633221	0.88327	0.909357	H33	1	0.867129	0.806061	0.667879	0.695725	0.678036	0.478193	0.667023	0.686723	1.17994	0.901178	0.808616	0.763746	0.0219536	-0.388834	1.6585	0.6853	0.0330107	-0.545192	1.48135	0.897288	0.355501	-0.156357	0.449159	136	15.3185	11.2681	Housekeeping	Histones	44		136
74758899	Q71DI3	H32	Histone H3.2	220	292	1.22624	1.31694	1.03971	0.968268	0.9898	0.970604	0.854326	1.0169	1.01623	H32	0.931129	1	0.789495	0.735243	0.751593	0.737017	0.648722	0.772173	0.771661	1.1943	0.976224	0.962486	0.817405	0.0562143	-0.290876	1.25015	0.805902	0.0769993	-0.311323	1.11351	0.985927	0.813433	-0.020447	0.0896782	136	15.3785	11.2681	Housekeeping	Histones	46		136
51317339	P62805	H4	Histone H4	221	507	1.25952	1.14856	1.11773	0.877687	0.951214	0.873616	0.790213	0.922187	0.943008	H4	1	0.911904	0.887421	0.696842	0.755218	0.693609	0.627392	0.732172	0.748703	1.17527	0.900839	0.885136	0.766495	0.00532787	-0.383652	2.27345	0.753134	0.010758	-0.409022	1.96827	0.982569	0.785966	-0.0253698	0.104596	103	11.3604	11.356	Housekeeping	Histones(47)	47		103
130848	P25786	PSA1	Proteasome subunit alpha type-1	222	93	0.933478	0.945756	0.994901	0.957402	0.929556	0.951332	1.00602	1.0904	1.10425	PSA1	0.845352	0.85647	0.900976	0.867017	0.8418	0.86152	0.911042	0.987457	1	0.958045	0.946097	1.06689	0.987528	0.592698	-0.0181058	0.227167	1.11361	0.0389634	0.155243	1.40934	1.12767	0.0192075	0.173349	1.71653	263	29.5369	6.60986	Housekeeping	Proteasome	1		263
130850	P25787	PSA2	Proteasome subunit alpha type-2	223	40	0.924591	0.933274	0.978943	0.969453	0.915964	0.909499	0.966325	1.0526	1.08252	PSA2	0.854109	0.86213	0.904318	0.895551	0.846139	0.840168	0.892661	0.972356	1	0.945603	0.931639	1.03381	0.985233	0.611727	-0.0214636	0.213442	1.09329	0.0848338	0.128671	1.07143	1.10967	0.0616422	0.150134	1.21012	234	25.8823	7.43018	Housekeeping	Proteasome	2		234
130859	P25788	PSA3	Proteasome subunit alpha type-3	224	48	0.960703	0.920456	0.982368	0.931645	0.949043	0.896562	0.976508	1.04132	1.09	PSA3	0.881375	0.844451	0.901251	0.854717	0.870678	0.82253	0.895875	0.955335	1	0.954509	0.92575	1.03594	0.96987	0.293747	-0.0441362	0.532026	1.08532	0.0959239	0.118115	1.01807	1.11903	0.0386187	0.162252	1.4132	255	28.4151	5.32568	Housekeeping	Proteasome	3		255
130861	P25789	PSA4	Proteasome subunit alpha type-4	225	60	0.940509	0.957313	0.99928	0.87818	0.936068	0.890267	1.04792	1.11043	1.10041	PSA4	0.846978	0.862111	0.899904	0.790847	0.842979	0.801732	0.943707	1	0.990979	0.965701	0.901505	1.08625	0.933524	0.0609409	-0.0992404	1.21509	1.12483	0.0098879	0.169713	2.0049	1.20493	0.00213344	0.268954	2.67092	261	29.4652	7.72314	Housekeeping	Proteasome	4		261
38258905	P28066	PSA5	Proteasome subunit alpha type-5	226	44	0.926162	0.928642	1.00045	0.953629	0.908139	0.940152	1.03678	1.10266	1.12099	PSA5	0.826199	0.828411	0.892468	0.850701	0.810121	0.838679	0.924876	0.983643	1	0.951751	0.933973	1.08681	0.981321	0.557905	-0.0272034	0.25344	1.1419	0.0187087	0.191441	1.72796	1.16364	0.00614222	0.218645	2.21167	241	26.3942	4.79248	Housekeeping	Proteasome	5		241
46397659	P60900	PSA6	Proteasome subunit alpha type-6	227	90	0.900668	0.92197	1.0148	0.957146	0.954972	0.951322	1.00895	1.09677	1.13424	PSA6	0.794074	0.812855	0.894703	0.843868	0.841951	0.838733	0.889541	0.96697	1	0.945814	0.95448	1.07999	1.00916	0.817046	0.0131583	0.0877534	1.14186	0.0582965	0.191385	1.23436	1.13149	0.0278667	0.178227	1.55491	246	27.3818	6.75635	Housekeeping	Proteasome	6		246
12643540	O14818	PSA7	Proteasome subunit alpha type-7	228	61	0.991062	0.941705	0.989499	0.940453	0.914859	0.959447	1.03859	1.15511	1.10712	PSA7	0.857982	0.815253	0.856629	0.814169	0.792012	0.830613	0.899131	1	0.95846	0.974089	0.938253	1.10027	0.963211	0.158754	-0.0540757	0.799275	1.12954	0.028148	0.175739	1.55055	1.17268	0.0110182	0.229815	1.95789	248	27.8696	8.45557	Housekeeping	Proteasome	7		248
130853	P20618	PSB1	Proteasome subunit beta type-1	229	49	0.942129	0.94207	0.984016	0.944876	0.926983	0.956032	1.02532	1.15929	1.1071	PSB1	0.812677	0.812627	0.848809	0.815047	0.799612	0.82467	0.88444	1	0.954981	0.956072	0.942631	1.09724	0.985941	0.456798	-0.0204265	0.340276	1.14765	0.0270611	0.198686	1.56766	1.16402	0.0179096	0.219113	1.74691	241	26.4724	8.1333	Housekeeping	Proteasome	8		241
1709762	P49721	PSB2	Proteasome subunit beta type-2	230	18	0.950604	0.912603	0.977861	0.913868	0.881388	0.928022	0.979325	0.991109	1.03573	PSB2	0.917808	0.881118	0.944125	0.88234	0.85098	0.896005	0.945538	0.956916	1	0.947023	0.907759	1.00206	0.95854	0.168996	-0.0610894	0.772125	1.05811	0.0976232	0.0814917	1.01045	1.10388	0.0128596	0.142581	1.89077	201	22.8217	7.02002	Housekeeping	Proteasome	9		201
20532411	P49720	PSB3	Proteasome subunit beta type-3	231	27	0.944238	0.944137	0.996714	0.953639	0.904986	0.903325	1.00656	1.06508	1.06997	PSB3	0.882492	0.882397	0.931536	0.891278	0.845806	0.844254	0.940734	0.995436	1	0.961696	0.92065	1.0472	0.957319	0.163196	-0.0629289	0.787291	1.08891	0.0334353	0.122888	1.47579	1.13746	0.00847921	0.185817	2.07164	205	22.9335	6.55127	Housekeeping	Proteasome	10		205
116242733	P28070	PSB4	Proteasome subunit beta type-4	232	43	0.962222	0.95817	1.02763	0.934962	0.890986	0.904831	1.00344	1.09851	1.05773	PSB4	0.875935	0.872247	0.935477	0.85112	0.811088	0.823691	0.913457	1	0.962876	0.982674	0.91026	1.05322	0.926309	0.0494668	-0.110434	1.30569	1.07179	0.118295	0.100029	0.927035	1.15706	0.00933458	0.210463	2.02991	264	29.1855	5.97314	Housekeeping	Proteasome	11		264
187608890	P28074	PSB5	Proteasome subunit beta type-5	233	40	0.937815	0.972475	1.00017	0.933511	0.974264	0.917158	0.993133	1.04323	1.04733	PSB5	0.89543	0.928523	0.954965	0.891321	0.930232	0.875707	0.948248	0.996082	1	0.970152	0.941645	1.0279	0.970615	0.313918	-0.0430289	0.503183	1.05952	0.0826969	0.0834155	1.08251	1.0916	0.0238971	0.126444	1.62166	263	28.4622	6.91748	Housekeeping	Proteasome	12		263
20532407	P28072	PSB6	Proteasome subunit beta type-6	234	29	0.904511	0.907065	1.0193	0.917055	0.904917	0.893446	0.962676	1.09994	1.0921	PSB6	0.822329	0.824651	0.926692	0.833734	0.822698	0.812269	0.875209	1	0.992878	0.943626	0.905139	1.05157	0.959214	0.373537	-0.0600761	0.427666	1.1144	0.138355	0.156261	0.859004	1.16178	0.0313083	0.216337	1.50434	239	25.3414	4.91943	Housekeeping	Proteasome	13		239
17380263	Q99436	PSB7	Proteasome subunit beta type-7	235	25	0.918923	0.931835	1.01341	0.924078	0.833924	0.901471	0.992112	1.09881	1.08089	PSB7	0.836286	0.848037	0.922275	0.840977	0.758931	0.820403	0.902893	1	0.983689	0.954722	0.886491	1.05727	0.928533	0.164093	-0.106975	0.784911	1.10741	0.0816282	0.147194	1.08816	1.19265	0.0161118	0.254169	1.79286	277	29.9462	7.6792	Housekeeping	Proteasome	14		277
334302881	P28062	PSB8	Proteasome subunit beta type-8	236	7	0.895317	0.901887	0.879015	0.980028	0.929807	0.946385	1.11743	1.18901	1.12941	PSB8	0.752993	0.758519	0.739282	0.824239	0.782001	0.795943	0.939794	1	0.949871	0.892073	0.952073	1.14528	1.06726	0.0210318	0.0939114	1.67712	1.28384	0.00039733	0.360468	3.40085	1.20293	0.00191189	0.266557	2.71854	276	30.3346	7.43018	Housekeeping	Proteasome	15		276
417529	P28065	PSB9	Proteasome subunit beta type-9	237	2	0.951916	0.824442	0.802074	0.813208	0.84964	0.924178	1.03287	1.23872	1.3427	PSB9	0.708955	0.614017	0.597358	0.60565	0.632784	0.688297	0.769244	0.922559	1	0.859477	0.862342	1.20476	1.00333	0.962301	0.00480046	0.0166889	1.40174	0.0279118	0.487218	1.55421	1.39708	0.0240061	0.482417	1.61968	219	23.2495	5.03369	Housekeeping	Proteasome	16		219
730376	P40306	PSB10	Proteasome subunit beta type-10	238	4	0.999597	0.935163	0.800462	0.959331	0.937901	0.940771	1.03356	1.2516	1.17923	PSB10	0.798656	0.747174	0.639551	0.766484	0.749362	0.751655	0.825795	1	0.942178	0.91174	0.946001	1.1548	1.03758	0.592896	0.0532179	0.227021	1.26659	0.0489709	0.340945	1.31006	1.22072	0.0317088	0.287727	1.49882	273	28.9181	7.81104	Housekeeping	Proteasome(17)	17		273
223590263	Q13098	CSN1	COP9 signalosome complex subunit 1	239	20	0.998749	1.16622	1.18834	0.890006	0.89278	0.949384	1.03393	1.01817	1.00484	CSN1	0.840457	0.981388	1	0.748949	0.751283	0.798916	0.870062	0.856798	0.845579	1.11777	0.910723	1.01898	0.814768	0.0301699	-0.29554	1.52043	0.911616	0.177481	-0.133502	0.750848	1.11887	0.00683033	0.162038	2.16556	491	55.5012	6.7417	Housekeeping	COP9 signalosome complex subunit 1	1		491
47117681	P61201	CSN2	COP9 signalosome complex subunit 2	240	24	0.955329	0.958559	1.0818	0.939007	0.85248	0.840494	1.0761	1.0068	1.03037	CSN2	0.883092	0.886077	1	0.868005	0.78802	0.77694	0.994732	0.930674	0.95246	0.998563	0.877327	1.03776	0.87859	0.0798245	-0.186738	1.09786	1.03925	0.445218	0.0555462	0.351427	1.18286	0.012413	0.242284	1.90612	443	51.5641	5.52881	Housekeeping	COP9 signalosome complex subunit 2	2		443
55976621	Q9UNS2	CSN3	COP9 signalosome complex subunit 3	241	18	0.977328	1.00788	1.09591	0.964831	0.927203	0.914444	1.01102	1.00064	0.984919	CSN3	0.891796	0.919677	1	0.880392	0.846057	0.834415	0.922535	0.913064	0.898723	1.02704	0.935493	0.998857	0.910862	0.076834	-0.134695	1.11445	0.972559	0.481394	-0.0401428	0.3175	1.06773	0.0200356	0.0945523	1.6982	423	47.842	6.65381	Housekeeping	COP9 signalosome complex subunit 3	3		423
55976582	Q9BT78	CSN4	COP9 signalosome complex subunit 4	242	28	0.925514	0.982616	1.08991	0.938563	0.900876	0.925678	1.01612	1.02749	1.07712	CSN4	0.849163	0.901553	1	0.861135	0.826556	0.849313	0.932292	0.942721	0.988263	0.999348	0.921706	1.04024	0.922307	0.191422	-0.116681	0.718007	1.04092	0.473225	0.05786	0.324933	1.12861	0.0055077	0.174541	2.25903	406	46.2397	5.8335	Housekeeping	COP9 signalosome complex subunit 4	4		406
55976562	Q92905	CSN5	COP9 signalosome complex subunit 5	243	17	0.924552	0.999044	1.07126	0.961148	0.851907	0.921577	1.0369	1.01232	1.01756	CSN5	0.863048	0.932585	1	0.89721	0.795236	0.860271	0.967923	0.944981	0.949871	0.998287	0.911544	1.02226	0.913109	0.177316	-0.131141	0.751253	1.02402	0.60693	0.0342394	0.216861	1.12146	0.0278857	0.165381	1.55462	334	37.5547	6.53662	Housekeeping	COP9 signalosome complex subunit 5	5		334
55976470	Q7L5N1	CSN6	COP9 signalosome complex subunit 6	244	21	0.949079	0.988393	1.09255	0.928923	0.937345	0.871818	1.01206	1.00606	1.03921	CSN6	0.868683	0.904667	1	0.850235	0.857943	0.797967	0.926331	0.920836	0.951182	1.01001	0.912695	1.01911	0.903652	0.109829	-0.14616	0.959283	1.00901	0.846182	0.0129468	0.0725362	1.1166	0.00978816	0.159107	2.0093	327	36.1402	5.73193	Housekeeping	COP9 signalosome complex subunit 6	6		327
55976598	Q9H9Q2	CSN7B	COP9 signalosome complex subunit 7b	245	8	1.03827	1.06555	1.19302	1.01337	0.888704	0.992786	1.05936	1.08452	1.04587	CSN7B	0.870291	0.893158	1	0.849416	0.744921	0.832164	0.88797	0.90906	0.876663	1.09895	0.964952	1.06325	0.87807	0.0942871	-0.187593	1.02555	0.96752	0.506829	-0.0476365	0.295139	1.10187	0.0708595	0.139956	1.1496	264	29.6034	6.15088	Housekeeping	COP9 signalosome complex subunit 7b	7		264
55976618	Q9UBW8	CSN7A	COP9 signalosome complex subunit 7a	246	17	0.975439	1.00093	1.01667	0.965591	0.918421	0.926174	1.02867	1.04159	1.09408	CSN7A	0.891561	0.914861	0.929249	0.88256	0.839446	0.846532	0.940211	0.952023	1	0.997681	0.936729	1.05478	0.938906	0.0321801	-0.0909476	1.49241	1.05723	0.0706604	0.0802897	1.15082	1.12602	0.00886154	0.171237	2.05249	275	30.258	8.22119	Housekeeping	COP9 signalosome complex subunit 7a	8		275
55976572	Q99627	CSN8	COP9 signalosome complex subunit 8	247	11	0.953243	0.954226	0.985349	0.987975	0.997534	0.936174	1.04638	1.02002	1.03834	CSN8	0.910995	0.911935	0.941679	0.944188	0.953324	0.894683	1	0.974809	0.992318	0.964273	0.973894	1.03491	1.00998	0.681517	0.0143241	0.166523	1.07325	0.00574428	0.101991	2.24076	1.06265	0.0414484	0.0876665	1.38249	209	23.211	5.37646	Housekeeping	COP9 signalosome complexes(9)	9		209
3123225	P21399	ACOC	Cytoplasmic aconitate hydratase	248	72	0.78139	0.77177	0.839658	0.998643	0.910073	0.970904	1.09508	1.20954	1.23373	ACOC	0.633354	0.625557	0.680583	0.809449	0.737658	0.786965	0.887618	0.980395	1	0.797606	0.959873	1.17945	1.20344	0.00853073	0.267168	2.06901	1.47874	0.00132379	0.56437	2.87818	1.22876	0.0118686	0.297203	1.9256	889	98.3366	6.68311	Housekeeping	TCA	1		889
6686275	Q99798	ACON	Aconitate hydratase, mitochondrial	249	93	0.976613	0.877271	0.786656	1.10937	1.22716	1.15934	0.879308	0.978329	0.998766	ACON	0.795832	0.714879	0.641038	0.904011	1	0.944738	0.716539	0.79723	0.813884	0.88018	1.16529	0.952134	1.32392	0.0115745	0.404818	1.9365	1.08175	0.337571	0.113366	0.471635	0.817079	0.0132505	-0.291452	1.87777	780	85.3719	7.60596	Housekeeping	TCA	2		780	Carbohydrate metabolism
57015285	O75390	CISY	Citrate synthase, mitochondrial	250	88	1.06778	0.94281	0.874561	1.1024	1.16109	1.13791	0.806198	0.932378	0.939778	CISY	0.919633	0.812002	0.753222	0.949453	1	0.980036	0.694344	0.803017	0.809391	0.961717	1.1338	0.892785	1.17894	0.0435811	0.237486	1.3607	0.928324	0.388212	-0.1073	0.410931	0.787425	0.00663479	-0.344786	2.17817	466	51.6795	8.32373	Housekeeping	TCA	3		466	Carbohydrate metabolism
1169337	P31040	SDHA	Succinate dehydrogenase [ubiquinone] flavoprotein subunit, mitochondrial	251	65	0.996808	0.89312	0.827466	1.07755	1.16633	1.13144	0.789197	0.981428	0.974998	SDHA	0.854651	0.76575	0.709458	0.92388	1	0.970084	0.676647	0.841464	0.83595	0.905798	1.12511	0.915208	1.24212	0.0169456	0.312804	1.77094	1.01039	0.912062	0.0149092	0.0399757	0.813438	0.0368785	-0.297895	1.43323	664	72.6453	7.38623	Housekeeping	TCA	4		664	Carbohydrate metabolism
20455488	P21912	SDHB	Succinate dehydrogenase [ubiquinone] iron-sulfur subunit, mitochondrial	252	35	1.02787	0.899085	0.822464	1.07016	1.17687	1.14187	0.815339	1.02123	1.02254	SDHB	0.873392	0.763962	0.698856	0.909329	1	0.970262	0.692802	0.867753	0.868858	0.916473	1.12964	0.953036	1.23259	0.0344977	0.301694	1.46221	1.0399	0.709216	0.056438	0.149222	0.843666	0.0799284	-0.245256	1.0973	280	31.6088	8.76318	Housekeeping	TCA	5		280	Carbohydrate metabolism
1730117	P07954	FUMH	Fumarate hydratase, mitochondrial	253	76	1.12002	0.98674	0.914838	0.980415	1.07828	1.04934	0.819925	0.960012	0.979777	FUMH	1	0.881001	0.816803	0.875353	0.962729	0.936895	0.732061	0.857137	0.874783	1.0072	1.03601	0.919905	1.02861	0.688252	0.0406903	0.162253	0.913328	0.327838	-0.130794	0.484341	0.887929	0.116268	-0.171485	0.93454	510	54.6022	8.76318	Housekeeping	TCA	6		510	Carbohydrate metabolism
1708399	P50213	IDH3A	Isocitrate dehydrogenase [NAD] subunit alpha, mitochondrial	254	32	0.945644	0.863139	0.817938	1.10034	1.22933	1.18049	0.852994	0.998769	0.997011	IDH3A	0.769236	0.702122	0.665353	0.895077	1	0.960271	0.69387	0.812451	0.811021	0.875574	1.17005	0.949592	1.33633	0.00514371	0.418275	2.28872	1.08454	0.292267	0.117079	0.53422	0.811579	0.0227229	-0.301196	1.64354	366	39.5661	6.91748	Housekeeping	TCA	7		366
146345439	O43837	IDH3B	Isocitrate dehydrogenase [NAD] subunit beta, mitochondrial	255	10	0.953853	0.905509	0.880231	1.01524	1.13528	1.05184	0.895757	0.979882	0.971404	IDH3B	0.840191	0.797608	0.775342	0.894267	1	0.926499	0.789018	0.863119	0.855651	0.913198	1.06745	0.949015	1.16892	0.0206422	0.225175	1.68524	1.03922	0.356247	0.0555032	0.448249	0.889045	0.0561617	-0.169672	1.25056	385	42.1566	8.45557	Housekeeping	TCA	8		385
1708404	P51553	IDH3G	Isocitrate dehydrogenase [NAD] subunit gamma, mitochondrial	256	7	0.9326	0.857392	0.771494	1.08193	1.17628	1.13108	0.951253	0.940572	0.943892	IDH3G	0.79284	0.728903	0.655877	0.919788	1	0.961575	0.808698	0.799617	0.80244	0.853829	1.12976	0.945239	1.32317	0.00690269	0.403999	2.16098	1.10706	0.121616	0.146733	0.91501	0.836671	0.00254255	-0.257267	2.59473	393	42.7671	8.49951	Housekeeping	TCA	9		393
21903432	O75874	IDHC	Isocitrate dehydrogenase [NADP] cytoplasmic	257	79	0.783126	0.8537	1.01656	0.932612	0.796777	0.886756	1.13885	1.15688	1.15759	IDHC	0.676513	0.73748	0.878166	0.805649	0.688306	0.766036	0.983814	0.999381	1	0.884461	0.872048	1.15111	0.985966	0.883932	-0.0203908	0.0535813	1.30148	0.0184169	0.380151	1.73478	1.32	0.00229653	0.400542	2.63893	414	46.6295	7.00537	Housekeeping	TCA	10		414
20141568	P48735	IDHP	Isocitrate dehydrogenase [NADP], mitochondrial	258	48	1.03359	0.934267	0.763379	1.05036	1.20902	1.14899	0.890093	0.968341	1.01369	IDHP	0.854897	0.772748	0.631403	0.868767	1	0.950346	0.73621	0.80093	0.838442	0.910411	1.13612	0.957375	1.24792	0.0691162	0.319526	1.16042	1.05159	0.617091	0.0725659	0.209651	0.84267	0.0381568	-0.246961	1.41843	452	50.8769	8.68994	Housekeeping	TCA	11		452
1708967	P40925	MDHC	Malate dehydrogenase, cytoplasmic	259	73	0.714046	0.822363	1.06255	0.938107	0.825851	0.860938	1.33581	1.14359	1.19254	MDHC	0.534541	0.615628	0.795434	0.702276	0.618239	0.644506	1	0.856103	0.892742	0.866319	0.874965	1.22398	1.00998	0.940141	0.0143267	0.0268072	1.41285	0.0387687	0.498609	1.41152	1.39889	0.00631268	0.484282	2.19979	334	36.403	7.35693	Housekeeping	TCA	12		334
215274114	P40926	MDHM	Malate dehydrogenase, mitochondrial	260	215	0.957406	0.824123	0.729303	1.19164	1.28408	1.24818	0.809855	0.988677	1.00717	MDHM	0.745596	0.6418	0.567957	0.92801	1	0.972043	0.630688	0.769949	0.784348	0.836944	1.2413	0.935233	1.48314	0.00479803	0.568651	2.31894	1.11744	0.342273	0.160195	0.465628	0.753429	0.0110502	-0.408456	1.95663	338	35.4807	8.67529	Housekeeping	TCA	13		338
160332299	Q02218	ODO1	2-oxoglutarate dehydrogenase, mitochondrial	261	61	0.963653	0.872241	0.781542	1.10673	1.23153	1.15792	0.894992	0.958192	0.951844	ODO1	0.782482	0.708256	0.634609	0.89866	1	0.940226	0.72673	0.778049	0.772894	0.872478	1.16539	0.93501	1.33573	0.0101205	0.417626	1.9948	1.07167	0.328818	0.0998617	0.483045	0.802312	0.00511645	-0.317765	2.29103	1023	115.861	6.85889	Housekeeping	TCA	14		1023
223634731	P53597	SUCA	Succinyl-CoA ligase [ADP/GDP-forming] subunit alpha, mitochondrial	262	39	0.954559	0.872249	0.777182	1.10222	1.21861	1.1258	0.816945	0.969829	1.02184	SUCA	0.783319	0.715775	0.637762	0.904487	1	0.923841	0.670392	0.79585	0.838531	0.867997	1.14887	0.936205	1.32359	0.0107869	0.404459	1.9671	1.07858	0.442172	0.109134	0.354409	0.814889	0.0401514	-0.295325	1.3963	346	36.2268	8.79248	Housekeeping	TCA	15		346	Carbohydrate metabolism
94730427	Q9P2R7	SUCB1	Succinyl-CoA ligase [ADP-forming] subunit beta, mitochondrial	263	46	1.01776	0.911311	0.829797	1.11595	1.24181	1.18423	0.849254	0.921629	0.923678	SUCB1	0.819572	0.733855	0.668214	0.898644	1	0.953632	0.683882	0.742164	0.743814	0.919621	1.18066	0.898187	1.28386	0.0162919	0.360488	1.78803	0.976692	0.737587	-0.0340239	0.132187	0.760747	0.00298636	-0.394512	2.52486	463	50.2852	7.41553	Housekeeping	TCA	16		463	Carbohydrate metabolism
52788292	Q96I99	SUCB2	Succinyl-CoA ligase [GDP-forming] subunit beta, mitochondrial	264	50	0.92698	0.839059	0.763195	1.06393	1.21926	1.11028	0.825401	1.01426	1.07793	SUCB2	0.760279	0.68817	0.625948	0.872604	1	0.910619	0.676968	0.83186	0.884083	0.843078	1.13116	0.972528	1.3417	0.0120305	0.424065	1.91972	1.15355	0.221106	0.206075	0.655399	0.859763	0.148253	-0.21799	0.828997	432	46.4814	6.39209	Housekeeping	TCAs(17)	17		432	Carbohydrate metabolism
128676	P03891	NU2M	NADH-ubiquinone oxidoreductase chain 2	265	1	0.877826	0.801885	0.658703	0.985865	1.02084	1.22824	0.755127	1.12499	0.939927	NU2M	0.714705	0.652876	0.536301	0.802668	0.831146	1	0.614807	0.915941	0.765266	0.779471	1.07831	0.940015	1.38339	0.039495	0.468209	1.40346	1.20596	0.267079	0.270187	0.573359	0.871745	0.350139	-0.198022	0.455759	347	38.9348	9.83252	Housekeeping	Complex I -core	2		347
128710	P03897	NU3M	NADH-ubiquinone oxidoreductase chain 3	266	1	1.07515	0.92887	0.802067	1.16545	1.02378	1.20361	0.892595	1.11307	0.950665	NU3M	0.893272	0.771734	0.666382	0.968292	0.850591	1	0.741596	0.924776	0.789842	0.935364	1.13095	0.985444	1.2091	0.111303	0.273934	0.953492	1.05354	0.651792	0.0752471	0.185891	0.871343	0.164801	-0.198687	0.783039	115	13.1771	4.43701	Housekeeping	Complex I -core	3		115
6648059	P03915	NU5M	NADH-ubiquinone oxidoreductase chain 5	267	1	0.92231	1.06765	0.808543	0.936501	1.32797	1.15719	0.562238	1.20738	0.935034	NU5M	0.694524	0.803969	0.608854	0.705211	1	0.871398	0.42338	0.909187	0.704106	0.932834	1.14056	0.90155	1.22268	0.201054	0.290045	0.696687	0.966463	0.884116	-0.0492133	0.0534908	0.790448	0.33575	-0.339258	0.473985	603	66.9824	9.02686	Housekeeping	Complex I -core	6		603
6093488	O43678	NDUA2	NADH dehydrogenase [ubiquinone] 1 alpha subcomplex subunit 2	268	18	0.955604	0.937932	0.847356	1.0975	1.14595	1.13272	0.843886	0.978043	1.02926	NDUA2	0.833895	0.818473	0.739433	0.957717	1	0.988448	0.736405	0.853476	0.898173	0.913631	1.12539	0.950398	1.23178	0.00439587	0.300741	2.35696	1.04024	0.599937	0.0569199	0.221894	0.844506	0.0375478	-0.243821	1.42542	99	10.9148	9.56885	Housekeeping	Complex I-accessory	9		99
6093489	O95167	NDUA3	NADH dehydrogenase [ubiquinone] 1 alpha subcomplex subunit 3	269	4	0.89022	0.932021	0.812153	1.06595	1.16827	1.17093	0.926357	0.972871	1.01236	NDUA3	0.76027	0.795969	0.693599	0.910346	0.997732	1	0.791132	0.830856	0.864581	0.878131	1.13505	0.97053	1.29257	0.00645489	0.370245	2.19011	1.10522	0.0982822	0.144336	1.00753	0.855056	0.0180726	-0.225909	1.74298	84	9.27285	8.45557	Housekeeping	Complex I-accessory	10		84
2499333	O00483	NDUA4	Cytochrome c oxidase subunit NDUFA4	270	29	0.928947	0.824612	0.773755	1.18974	1.13671	1.16785	0.779607	0.987184	1.04702	NDUA4	0.7808	0.693104	0.650358	1	0.955431	0.9816	0.655276	0.829749	0.880043	0.842438	1.16477	0.937937	1.38261	0.00260017	0.467396	2.585	1.11336	0.362592	0.15492	0.440582	0.805259	0.0513607	-0.312476	1.28937	81	9.36391	9.37842	Housekeeping	Complex I-accessory	11		81
2499316	Q16718	NDUA5	NADH dehydrogenase [ubiquinone] 1 alpha subcomplex subunit 5	271	14	1.01112	0.962157	0.762751	1.14208	1.32241	1.15241	0.867359	0.963142	1.02813	NDUA5	0.764604	0.727578	0.576788	0.863637	1	0.871444	0.655893	0.728324	0.777466	0.912009	1.20563	0.952877	1.32195	0.0375362	0.402671	1.42555	1.04481	0.670488	0.063242	0.173609	0.790354	0.0278349	-0.339429	1.55541	116	13.4502	5.98584	Housekeeping	Complex I-accessory	12		116
298286909	P56556	NDUA6	NADH dehydrogenase [ubiquinone] 1 alpha subcomplex subunit 6	272	7	0.9498	0.800141	0.834014	1.08691	1.21996	1.17989	1.0026	0.924364	1.00584	NDUA6	0.778548	0.655873	0.683639	0.890935	1	0.967154	0.821832	0.757698	0.824483	0.861318	1.16225	0.977603	1.34939	0.00743002	0.432307	2.12901	1.13501	0.0913713	0.182702	1.03919	0.841126	0.0178114	-0.249606	1.7493	154	17.8593	10.1401	Housekeeping	Complex I-accessory	13		154
6093463	O95182	NDUA7	NADH dehydrogenase [ubiquinone] 1 alpha subcomplex subunit 7	273	9	0.952837	0.894895	0.774216	1.10188	1.1574	1.13407	0.897611	1.01398	1.03773	NDUA7	0.82326	0.773197	0.668929	0.952032	1	0.97985	0.775544	0.876091	0.896605	0.873983	1.13112	0.983107	1.29421	0.00949368	0.37207	2.02257	1.12486	0.184507	0.169744	0.733988	0.869148	0.0327623	-0.202326	1.48463	113	12.5436	10.1841	Housekeeping	Complex I-accessory	14		113
8039804	P51970	NDUA8	NADH dehydrogenase [ubiquinone] 1 alpha subcomplex subunit 8	274	9	0.947434	0.931742	0.895861	1.1338	1.20809	1.24919	0.864067	1.02715	1.05535	NDUA8	0.75844	0.745878	0.717154	0.907631	0.967098	1	0.691702	0.822255	0.84483	0.925013	1.19703	0.98219	1.29407	0.0018334	0.37191	2.73674	1.06181	0.405442	0.0865295	0.392071	0.820525	0.0349991	-0.285381	1.45594	172	20.0921	7.6499	Housekeeping	Complex I-accessory	15		172
2833280	Q16795	NDUA9	NADH dehydrogenase [ubiquinone] 1 alpha subcomplex subunit 9, mitochondrial	275	28	0.970284	0.871368	0.804653	1.11449	1.23627	1.16514	0.845044	0.996863	1.03946	NDUA9	0.784849	0.704837	0.650872	0.901495	1	0.942465	0.683544	0.806349	0.840806	0.882102	1.17197	0.960456	1.32861	0.00830046	0.409914	2.0809	1.08883	0.361552	0.122775	0.441829	0.819526	0.0370826	-0.287139	1.43083	377	42.4826	9.80322	Housekeeping	Complex I-accessory	16		377
6093592	O95299	NDUAA	NADH dehydrogenase [ubiquinone] 1 alpha subcomplex subunit 10, mitochondrial	276	27	0.942526	0.827421	0.721085	1.14207	1.23246	1.21949	0.855048	1.02729	1.05149	NDUAA	0.76475	0.671356	0.585077	0.926656	1	0.989477	0.693772	0.833524	0.853165	0.830344	1.19801	0.977943	1.44279	0.00625227	0.528857	2.20396	1.17776	0.172404	0.236041	0.763452	0.816307	0.031754	-0.292816	1.4982	355	40.7249	8.48486	Housekeeping	Complex I-accessory	17		355
52000823	Q86Y39	NDUAB	NADH dehydrogenase [ubiquinone] 1 alpha subcomplex subunit 11	277	3	0.792035	0.748018	0.857243	1.05511	1.06792	1.03964	0.978001	0.973924	1.07442	NDUAB	0.737177	0.696208	0.797869	0.982029	0.993949	0.967631	0.910262	0.906468	1	0.799099	1.05422	1.00878	1.31926	0.00146704	0.399732	2.83356	1.2624	0.0100917	0.336167	1.99604	0.956897	0.250485	-0.0635651	0.601217	141	14.8425	8.71924	Housekeeping	Complex I-accessory	18		141
12229870	Q9UI09	NDUAC	NADH dehydrogenase [ubiquinone] 1 alpha subcomplex subunit 12	278	21	0.960078	0.873071	0.773566	1.1014	1.18713	1.14465	0.820983	0.926672	0.992293	NDUAC	0.808736	0.735445	0.651625	0.927781	1	0.964213	0.691568	0.780596	0.835873	0.868905	1.14439	0.913316	1.31705	0.00968918	0.397314	2.01371	1.05111	0.577988	0.0719157	0.238081	0.798078	0.014278	-0.325398	1.84533	145	17.1036	9.62744	Housekeeping	Complex I-accessory	19		145
20139242	Q9P0J0	NDUAD	NADH dehydrogenase [ubiquinone] 1 alpha subcomplex subunit 13	279	14	0.944227	0.812562	0.73133	1.08122	1.15431	1.10462	0.811255	1.0041	0.975606	NDUAD	0.818002	0.703938	0.633565	0.936683	1	0.956956	0.702806	0.86987	0.845187	0.829373	1.11338	0.93032	1.34244	0.0123979	0.424859	1.90665	1.12171	0.30739	0.165706	0.51231	0.835579	0.0455905	-0.259153	1.34113	144	16.6876	8.42627	Housekeeping	Complex I-accessory	20		144
21903370	O14561	ACPM	Acyl carrier protein, mitochondrial	280	24	0.969612	0.845288	0.753066	1.04105	1.1931	1.1406	0.761886	0.919805	0.903857	ACPM	0.81268	0.708478	0.631182	0.872552	1	0.955995	0.638574	0.770935	0.757568	0.855988	1.12492	0.861849	1.31417	0.0250349	0.394155	1.60145	1.00685	0.945352	0.00984446	0.0244066	0.766145	0.0172734	-0.384311	1.76262	156	17.406	4.93213	Housekeeping	Complex I-accessory	21		156
6093505	O75438	NDUB1	NADH dehydrogenase [ubiquinone] 1 beta subcomplex subunit 1	281	4	0.965508	0.83476	0.705534	1.16009	1.24794	1.28281	0.75412	1.00467	1.05591	NDUB1	0.752653	0.650729	0.549992	0.904335	0.97282	1	0.587867	0.783183	0.823126	0.835267	1.23028	0.938235	1.47292	0.00908369	0.558675	2.04174	1.12328	0.438138	0.167712	0.358389	0.76262	0.0433908	-0.390964	1.3626	58	6.95664	8.92432	Housekeeping	Complex I-accessory	22		58
6093472	O43676	NDUB3	NADH dehydrogenase [ubiquinone] 1 beta subcomplex subunit 3	282	11	0.929373	0.761827	0.828935	1.1099	1.16453	1.07803	0.848305	0.948866	1.01799	NDUB3	0.798064	0.65419	0.711817	0.953083	1	0.925718	0.72845	0.814803	0.87416	0.840045	1.11749	0.938387	1.33027	0.00718797	0.41172	2.14339	1.11707	0.228661	0.159716	0.640809	0.839729	0.0318201	-0.252004	1.4973	98	11.3947	9.20264	Housekeeping	Complex I-accessory	24		98
6093473	O95168	NDUB4	NADH dehydrogenase [ubiquinone] 1 beta subcomplex subunit 4	283	13	0.94114	0.806369	0.736193	1.19213	1.33099	1.17227	0.8168	0.989681	1.00843	NDUB4	0.707098	0.605842	0.553117	0.89567	1	0.880753	0.613679	0.743568	0.757655	0.827901	1.2318	0.938304	1.48786	0.00666292	0.573234	2.17634	1.13335	0.266899	0.180597	0.573652	0.761736	0.0204116	-0.392637	1.69012	129	15.1991	9.84717	Housekeeping	Complex I-accessory	25		129
6093510	O43674	NDUB5	NADH dehydrogenase [ubiquinone] 1 beta subcomplex subunit 5, mitochondrial	284	5	1.01876	0.987742	0.911216	1.1473	1.24915	1.17808	0.93238	0.960709	1.03744	NDUB5	0.815563	0.79073	0.729468	0.918461	1	0.943107	0.746411	0.769089	0.830514	0.972573	1.19151	0.976842	1.22511	0.00758469	0.292913	2.12006	1.00439	0.92865	0.00631885	0.0321478	0.819835	0.00786115	-0.286595	2.10451	189	21.7366	9.62744	Housekeeping	Complex I-accessory	26		189
6093474	O95139	NDUB6	NADH dehydrogenase [ubiquinone] 1 beta subcomplex subunit 6	285	8	0.954479	0.838384	0.797023	1.10997	1.25536	1.14343	0.848223	0.98904	0.985032	NDUB6	0.760326	0.667846	0.634898	0.884192	1	0.910845	0.675684	0.787857	0.784664	0.863295	1.16959	0.940765	1.35479	0.00895391	0.438074	2.04799	1.08974	0.305963	0.12398	0.514332	0.804356	0.0230703	-0.314094	1.63695	128	15.4791	9.62744	Housekeeping	Complex I-accessory	27		128
12644140	P17568	NDUB7	NADH dehydrogenase [ubiquinone] 1 beta subcomplex subunit 7	286	9	0.927533	0.882554	0.781478	1.03035	1.17795	1.14791	0.912542	1.08424	1.01391	NDUB7	0.787412	0.749228	0.663421	0.874698	1	0.974496	0.774685	0.920449	0.860739	0.863855	1.11874	1.00357	1.29505	0.0150379	0.373011	1.82281	1.16173	0.101501	0.216273	0.993528	0.897051	0.161559	-0.156738	0.791668	137	16.3913	8.92432	Housekeeping	Complex I-accessory	28		137
6093490	O95169	NDUB8	NADH dehydrogenase [ubiquinone] 1 beta subcomplex subunit 8, mitochondrial	287	5	0.93143	0.784966	0.741408	1.18081	1.21603	1.23818	0.889044	1.0048	0.965674	NDUB8	0.752257	0.633967	0.598788	0.953667	0.98211	1	0.718024	0.81151	0.779914	0.819268	1.21167	0.953172	1.47897	0.00279885	0.564594	2.55302	1.16344	0.115414	0.2184	0.93774	0.786657	0.00241017	-0.346194	2.61795	186	21.7514	6.80029	Housekeeping	Complex I-accessory	29		186
8134589	Q9Y6M9	NDUB9	NADH dehydrogenase [ubiquinone] 1 beta subcomplex subunit 9	288	25	0.95296	0.892318	0.807707	1.12238	1.21225	1.14884	0.894106	1.00112	1.05824	NDUB9	0.786109	0.736085	0.666288	0.925864	1	0.947697	0.737559	0.82584	0.872954	0.884328	1.16116	0.984489	1.31304	0.00514631	0.392909	2.2885	1.11326	0.192297	0.154793	0.716027	0.847852	0.0325242	-0.238116	1.48779	179	21.8168	8.38232	Housekeeping	Complex I-accessory	30		179
6093491	O96000	NDUBA	NADH dehydrogenase [ubiquinone] 1 beta subcomplex subunit 10	289	24	0.928875	0.827929	0.696725	1.13128	1.16697	1.12485	0.831897	0.99414	1.03297	NDUBA	0.795972	0.709469	0.597037	0.969418	1	0.963903	0.712869	0.851899	0.885175	0.817843	1.14103	0.953003	1.39517	0.00917083	0.480444	2.03759	1.16526	0.212276	0.220657	0.673098	0.835211	0.0404787	-0.259787	1.39277	172	20.7632	8.48486	Housekeeping	Complex I-accessory	31		172
32469787	Q9NX14	NDUBB	NADH dehydrogenase [ubiquinone] 1 beta subcomplex subunit 11, mitochondrial	290	17	0.978339	0.876406	0.762506	1.14927	1.17083	1.31491	0.813042	1.09891	0.922779	NDUBB	0.744033	0.666513	0.579891	0.874024	0.890426	1	0.618324	0.835727	0.701779	0.872417	1.21167	0.94491	1.38887	0.0139268	0.473907	1.85615	1.08309	0.524206	0.115158	0.280498	0.779841	0.053122	-0.358749	1.27473	153	17.3057	5.22412	Housekeeping	Complex I-accessory	32		153
6093464	O95298	NDUC2	NADH dehydrogenase [ubiquinone] 1 subunit C2	291	9	0.908304	0.757018	0.665867	1.15495	1.22373	1.18832	0.761208	0.922772	0.905652	NDUC2	0.742244	0.618617	0.54413	0.943798	1	0.971067	0.622041	0.754066	0.740077	0.777063	1.189	0.863211	1.53012	0.00496153	0.613645	2.30438	1.11086	0.379682	0.151681	0.42058	0.725997	0.00405675	-0.461964	2.39182	119	14.1784	8.98291	Housekeeping	Complex I-accessory	34		119
92090799	P28331	NDUS1	NADH-ubiquinone oxidoreductase 75 kDa subunit, mitochondrial	292	83	0.949747	0.868376	0.78393	1.07225	1.17624	1.12228	0.890189	0.984411	1.03733	NDUS1	0.807441	0.738262	0.666469	0.911586	1	0.954123	0.756807	0.836911	0.881898	0.867351	1.12359	0.970642	1.29543	0.0105412	0.373428	1.97711	1.11909	0.183822	0.162323	0.735603	0.863876	0.0434645	-0.211104	1.36187	727	79.4165	6.22705	Housekeeping	Complex I -core	35		727
20178314	O75306	NDUS2	NADH dehydrogenase [ubiquinone] iron-sulfur protein 2, mitochondrial	293	30	0.984962	0.910502	0.844484	1.08172	1.16262	1.14194	0.902752	0.99511	1.02448	NDUS2	0.847194	0.783149	0.726365	0.93042	1	0.982217	0.776483	0.855922	0.881184	0.913316	1.12876	0.974114	1.23589	0.010363	0.305553	1.98451	1.06657	0.328622	0.0929761	0.483304	0.862995	0.0245229	-0.212577	1.61043	463	52.5117	7.54736	Housekeeping	Complex I -core	36		463
6166589	O75489	NDUS3	NADH dehydrogenase [ubiquinone] iron-sulfur protein 3, mitochondrial	294	36	0.936288	0.92396	0.815989	1.11543	1.22764	1.20491	0.879384	0.992772	1.0192	NDUS3	0.762672	0.75263	0.66468	0.908592	1	0.981484	0.71632	0.808682	0.830206	0.892079	1.18266	0.963784	1.32573	0.00479477	0.406792	2.31923	1.08038	0.27997	0.111538	0.552889	0.814929	0.0162916	-0.295254	1.78804	264	30.2227	7.50342	Housekeeping	Complex I -core	37		264
3287881	O43181	NDUS4	NADH dehydrogenase [ubiquinone] iron-sulfur protein 4, mitochondrial	295	10	0.96965	0.871048	0.761112	1.12167	1.15282	1.16057	0.862231	1.0012	0.999334	NDUS4	0.835493	0.750534	0.655808	0.966481	0.99332	1	0.742936	0.862678	0.861071	0.86727	1.14502	0.954255	1.32026	0.0106236	0.40082	1.97373	1.1003	0.315094	0.137894	0.501559	0.833396	0.0159448	-0.262926	1.79738	175	20.0954	10.3013	Housekeeping	Complex I-accessory	38		175
3914138	O43920	NDUS5	NADH dehydrogenase [ubiquinone] iron-sulfur protein 5	296	11	0.890907	0.936473	0.717743	1.15648	1.18309	1.22326	0.815356	0.937146	1.01483	NDUS5	0.728309	0.765558	0.586748	0.945412	0.967161	1	0.666546	0.766108	0.829614	0.848374	1.18761	0.922444	1.39986	0.00811173	0.485284	2.09089	1.08731	0.449091	0.12076	0.347666	0.776725	0.0123294	-0.364524	1.90906	106	12.5094	9.14404	Housekeeping	Complex I-accessory	39		106
6093600	O75380	NDUS6	NADH dehydrogenase [ubiquinone] iron-sulfur protein 6, mitochondrial	297	13	0.989129	0.929311	0.750571	1.16756	1.14012	1.08463	0.862652	0.94495	1.00167	NDUS6	0.847175	0.795942	0.642854	1	0.976499	0.928968	0.73885	0.809337	0.857919	0.88967	1.13077	0.936425	1.271	0.033376	0.345963	1.47657	1.05255	0.600096	0.0738933	0.22178	0.828131	0.0145977	-0.27207	1.83572	124	13.7028	8.27979	Housekeeping	Complex I-accessory	40		124
90110040	O75251	NDUS7	NADH dehydrogenase [ubiquinone] iron-sulfur protein 7, mitochondrial	298	10	0.929968	0.901506	0.814485	1.0581	1.187	1.1278	0.879858	1.05189	0.985439	NDUS7	0.783462	0.759484	0.686172	0.891405	1	0.950124	0.741246	0.886179	0.830194	0.881986	1.1243	0.972397	1.27473	0.00892296	0.350194	2.04949	1.10251	0.212162	0.140788	0.673333	0.864893	0.0717159	-0.209406	1.14438	213	23.5481	9.99365	Housekeeping	Complex I -core	41		213
2499325	O00217	NDUS8	NADH dehydrogenase [ubiquinone] iron-sulfur protein 8, mitochondrial	299	10	1.00144	0.996731	0.820054	0.937821	1.3081	0.955767	0.975531	1.03935	0.976759	NDUS8	0.765572	0.761971	0.626907	0.716936	1	0.730655	0.745764	0.794552	0.746703	0.939409	1.06723	0.997214	1.13606	0.395808	0.184044	0.402515	1.06153	0.412824	0.0861496	0.384235	0.934396	0.597848	-0.097894	0.223409	210	23.6896	6.34131	Housekeeping	Complex I -core	42		210
20455501	P49821	NDUV1	NADH dehydrogenase [ubiquinone] flavoprotein 1, mitochondrial	300	38	0.967369	0.869024	0.770941	1.09939	1.18989	1.1624	0.858824	1.02678	1.02682	NDUV1	0.812988	0.730337	0.647907	0.923941	1	0.976897	0.721765	0.862915	0.862947	0.869111	1.15056	0.970806	1.32384	0.0109233	0.404728	1.96165	1.11701	0.270967	0.159642	0.567083	0.843765	0.0442911	-0.245086	1.35368	464	50.7848	8.20654	Housekeeping	Complex I -core	43		464
20455499	P19404	NDUV2	NADH dehydrogenase [ubiquinone] flavoprotein 2, mitochondrial	301	29	0.946066	0.851053	0.756163	1.15131	1.19634	1.22558	0.822461	0.95577	0.974455	NDUV2	0.771936	0.694411	0.616986	0.939402	0.976148	1	0.671081	0.779854	0.7951	0.851094	1.19108	0.917562	1.39946	0.00447847	0.484874	2.34887	1.0781	0.412708	0.108487	0.384357	0.770364	0.0064746	-0.376387	2.18879	249	27.374	8.06006	Housekeeping	Complex I -core	44		249
21542405	Q9Y375	CIA30	Complex I intermediate-associated protein 30, mitochondrial	302	4	1.1812	1.05476	0.896553	1.01399	1.17787	1.06887	0.839878	1.02723	1.0058	CIA30	1	0.892952	0.759017	0.858435	0.997178	0.9049	0.711037	0.869649	0.851508	1.04417	1.08691	0.957637	1.04093	0.677333	0.0578726	0.169198	0.917128	0.441605	-0.124805	0.354966	0.881066	0.16555	-0.182678	0.78107	327	37.74	7.63525	Housekeeping	Complex I -core	46		327
3122965	Q16762	THTR	Thiosulfate sulfurtransferase	303	14	0.877817	0.796377	0.63549	1.15439	1.25535	1.28857	0.864205	0.975743	1.01521	THTR	0.681236	0.618034	0.493176	0.895872	0.974223	1	0.670672	0.757232	0.787861	0.769895	1.23277	0.951719	1.60122	0.0048143	0.679169	2.31747	1.23617	0.0973428	0.305875	1.0117	0.772018	0.00974982	-0.373294	2.011	297	33.4078	7.25439	Housekeeping	Complex I(47)	47		297
5915811	Q99643	C560	Succinate dehydrogenase cytochrome b560 subunit, mitochondrial	304	2	1.13353	0.958143	1.02275	0.865176	1.05336	0.964294	0.97058	0.923506	0.99941	C560	1	0.845271	0.902271	0.763256	0.929274	0.850698	0.856244	0.814715	0.881677	1.03814	0.960944	0.964499	0.925638	0.359646	-0.111481	0.444124	0.929062	0.257269	-0.106154	0.589613	1.0037	0.954601	0.00532694	0.0201779	169	18.5978	9.68604	Housekeeping	Complex II	3		169	Carbohydrate metabolism
3913480	O14521	DHSD	Succinate dehydrogenase [ubiquinone] cytochrome b small subunit, mitochondrial	305	1	0.919817	0.933357	0.993468	0.979014	0.988071	0.952715	0.967077	1.00459	1.04885	DHSD	0.876976	0.889886	0.947197	0.933416	0.942051	0.908342	0.922035	0.957798	1	0.948881	0.973267	1.00684	1.0257	0.384474	0.0366086	0.415134	1.06108	0.151237	0.0855329	0.820342	1.03449	0.264679	0.0489243	0.57728	159	17.0319	8.63135	Housekeeping	Complex II(4)	4		159	Carbohydrate metabolism
311033458	P08574	CY1	Cytochrome c1, heme protein, mitochondrial	306	15	0.93162	0.89879	0.883684	1.1207	1.26329	1.18941	0.883215	0.99742	1.04532	CY1	0.737456	0.711469	0.699511	0.887129	1	0.941518	0.69914	0.789543	0.827462	0.904698	1.19113	0.975319	1.31661	0.00276243	0.396825	2.55871	1.07806	0.231623	0.108439	0.635217	0.818817	0.0270447	-0.288386	1.56792	325	35.399	8.99756	Housekeeping	Complex III	1		325
408360043	P00156	CYB	Cytochrome b	307	1	1.04917	1.06415	0.931404	1.09378	1.14715	0.991959	1.01642	0.987878	1.00622	CYB	0.914592	0.927646	0.811932	0.953483	1	0.86472	0.886045	0.861162	0.877155	1.01491	1.07763	1.00351	1.0618	0.368364	0.0865143	0.433723	0.988769	0.803145	-0.0162946	0.0952058	0.931218	0.184508	-0.102809	0.733985	380	42.6895	8.04541	Housekeeping	Complex III	2		380
92090651	P31930	QCR1	Cytochrome b-c1 complex subunit 1, mitochondrial	308	62	0.996915	0.897281	0.80678	1.14132	1.2277	1.17366	0.76599	0.955198	0.986741	QCR1	0.812019	0.730864	0.657148	0.929638	1	0.955987	0.623923	0.778039	0.803732	0.900325	1.18089	0.902643	1.31163	0.00970426	0.39136	2.01304	1.00257	0.98028	0.0037088	0.00864987	0.764373	0.0192473	-0.387651	1.71563	480	52.6124	6.3667	Housekeeping	Complex III	3		480
21903482	P22695	QCR2	Cytochrome b-c1 complex subunit 2, mitochondrial	309	74	0.996108	0.932821	0.820336	1.10336	1.19394	1.15468	0.801301	0.963282	0.982862	QCR2	0.834301	0.781294	0.687081	0.924127	1	0.967112	0.671138	0.806807	0.823206	0.916422	1.15066	0.915815	1.2556	0.0153579	0.328376	1.81367	0.999338	0.994102	-0.000955445	0.00256903	0.795905	0.0205812	-0.329332	1.68653	453	48.4129	8.63135	Housekeeping	Complex III	5		453
20455515	P07919	QCR6	Cytochrome b-c1 complex subunit 6, mitochondrial	310	20	0.987961	0.945808	0.869635	1.1433	1.22367	1.21286	0.777469	0.953879	0.948992	QCR6	0.807373	0.772925	0.710676	0.934318	1	0.99116	0.635357	0.779521	0.775528	0.934468	1.19328	0.893447	1.27696	0.00377783	0.352711	2.42276	0.956102	0.576479	-0.0647634	0.239216	0.748734	0.00902792	-0.417474	2.04441	91	10.7319	4.43701	Housekeeping	Complex III	6		91
136717	P14927	QCR7	Cytochrome b-c1 complex subunit 7	311	23	0.95624	0.903844	0.815583	1.09264	1.24368	1.24123	0.801589	0.961751	0.900804	QCR7	0.768879	0.726749	0.655782	0.878557	1	0.998029	0.64453	0.773311	0.724305	0.891889	1.19252	0.888048	1.33707	0.00965664	0.419075	2.01517	0.995694	0.95369	-0.00622599	0.0205928	0.744684	0.0112104	-0.425301	1.95038	111	13.522	8.77783	Housekeeping	Complex III	7		111
20141846	O14949	QCR8	Cytochrome b-c1 complex subunit 8	312	8	0.920713	0.898867	0.876283	1.19783	1.2402	1.21769	0.87235	1.00445	0.977678	QCR8	0.742392	0.724777	0.706567	0.965835	1	0.981853	0.703396	0.809912	0.788325	0.898621	1.21857	0.951493	1.35605	5.54284e-05	0.439407	4.25627	1.05884	0.279559	0.0824804	0.553527	0.780826	0.0031722	-0.356926	2.49864	82	9.90012	10.0815	Housekeeping	Complex III	8		82
9297078	Q9UDW1	QCR9	Cytochrome b-c1 complex subunit 9	313	3	0.961747	0.869015	0.952886	1.08692	1.15018	1.19462	0.856298	0.951117	0.945107	QCR9	0.805068	0.727443	0.797651	0.909851	0.962805	1	0.716797	0.79617	0.791139	0.927883	1.14391	0.917507	1.23281	0.00736716	0.301955	2.1327	0.988818	0.819451	-0.0162228	0.0864771	0.802082	0.00664175	-0.318178	2.17772	63	7.30383	9.46631	Housekeeping	Complex III	9		63
143811471	P47985	UCRI	Cytochrome b-c1 complex subunit Rieske, mitochondrial	314	34	0.973447	1.00379	0.80695	1.11659	1.20396	1.15813	0.893652	1.00682	1.0277	UCRI	0.808534	0.833738	0.670244	0.927426	1	0.961928	0.742257	0.836258	0.853593	0.928063	1.15956	0.976057	1.24944	0.0249483	0.321283	1.60296	1.05171	0.55203	0.0727432	0.258037	0.841748	0.0196249	-0.24854	1.70719	274	29.6494	8.32373	Housekeeping	Complex III(10)	10		274
117086	P13073	COX41	Cytochrome c oxidase subunit 4 isoform 1, mitochondrial	315	66	0.988992	0.87844	0.784254	1.0928	1.23111	1.18857	0.852698	1.0074	0.982921	COX41	0.803333	0.713535	0.637029	0.887657	1	0.965445	0.692625	0.818287	0.798402	0.883896	1.17083	0.947674	1.32462	0.0162747	0.405582	1.78849	1.07216	0.449665	0.100514	0.347111	0.809404	0.024052	-0.305067	1.61885	169	19.564	9.51025	Housekeeping	Complex IV	1		169
218511986	P20674	COX5A	Cytochrome c oxidase subunit 5A, mitochondrial	316	52	0.998959	0.844254	0.742534	1.10024	1.23548	1.12896	0.778876	1.01287	1.01922	COX5A	0.808556	0.683339	0.601006	0.890533	1	0.913778	0.630421	0.819818	0.824955	0.861916	1.15489	0.936989	1.33992	0.0262723	0.422143	1.5805	1.0871	0.527693	0.120485	0.277619	0.81132	0.0708587	-0.301657	1.14961	150	16.7517	6.78564	Housekeeping	Complex IV	3		150
20141332	P10606	COX5B	Cytochrome c oxidase subunit 5B, mitochondrial	317	37	1.00731	0.883884	0.810168	1.15749	1.23907	1.23964	0.83006	0.987781	1.03383	COX5B	0.812579	0.713014	0.653549	0.933728	0.999536	1	0.669595	0.796827	0.83397	0.900453	1.21207	0.950555	1.34606	0.00807106	0.428746	2.09307	1.05564	0.584459	0.0781196	0.233246	0.784243	0.0178959	-0.350627	1.74725	129	13.6869	8.80713	Housekeeping	Complex IV	4		129
6166030	P12074	CX6A1	Cytochrome c oxidase subunit 6A1, mitochondrial	318	9	0.9175	0.706867	0.734637	1.05	1.15116	1.15652	1.01652	0.984792	1.05262	CX6A1	0.79333	0.611203	0.635215	0.907899	0.99537	1	0.878952	0.851515	0.910161	0.786334	1.11923	1.01798	1.42335	0.0111421	0.509287	1.95303	1.29459	0.0282705	0.37249	1.54867	0.909536	0.0637289	-0.136797	1.19566	109	12.1471	9.31982	Housekeeping	Complex IV	5		109
117115	P14854	CX6B1	Cytochrome c oxidase subunit 6B1	319	33	0.923099	0.822633	0.731848	1.08958	1.22198	1.12261	0.832321	0.970315	1.0059	CX6B1	0.755414	0.673198	0.598905	0.891651	1	0.91868	0.681126	0.794054	0.823178	0.82586	1.14472	0.93618	1.38609	0.0094184	0.471026	2.02602	1.13358	0.222757	0.180889	0.652168	0.817824	0.0345434	-0.290137	1.46163	86	10.1857	7.04932	Housekeeping	Complex IV	6		86
1352175	P09669	COX6C	Cytochrome c oxidase subunit 6C	320	24	0.970052	0.823722	0.738652	1.12677	1.2938	1.17464	0.765059	1.0119	1.03186	COX6C	0.749769	0.636668	0.570916	0.870895	1	0.907898	0.591327	0.782112	0.797539	0.844142	1.1984	0.936271	1.41967	0.0134304	0.505554	1.87191	1.10914	0.446409	0.149441	0.350268	0.781267	0.05733	-0.356113	1.24162	75	8.77569	10.3892	Housekeeping	Complex IV	8		75
117121	P14406	CX7A2	Cytochrome c oxidase subunit 7A2, mitochondrial	321	10	0.964917	0.785292	0.662934	0.978523	1.30464	1.0934	0.70544	1.00904	1.01985	CX7A2	0.739603	0.601921	0.508135	0.750032	1	0.838085	0.540716	0.773426	0.78171	0.804381	1.12552	0.911445	1.39924	0.0684439	0.484643	1.16467	1.1331	0.473083	0.180277	0.325063	0.809798	0.202261	-0.304366	0.694089	83	9.39011	9.75928	Housekeeping	Complex IV	10		83
399287	P24310	CX7A1	Cytochrome c oxidase subunit 7A1, mitochondrial	322	1	0.822884	0.631649	0.598291	1.39972	1.57657	1.60792	0.830439	0.846781	0.743823	CX7A1	0.511771	0.392837	0.372091	0.870517	0.980503	1	0.516469	0.526633	0.462601	0.684275	1.52807	0.807014	2.23312	0.00090118	1.15906	3.04519	1.17937	0.185785	0.238018	0.730989	0.528128	0.000566542	-0.921041	3.24677	79	9.11177	10.1108	Housekeeping	Complex IV	9		79
20141187	O14548	COX7R	Cytochrome c oxidase subunit 7A-related protein, mitochondrial	323	6	1.08996	0.938727	0.916736	1.05	1.18707	1.15078	0.788841	0.942971	0.941973	COX7R	0.918194	0.790795	0.77227	0.884529	1	0.969432	0.664529	0.79437	0.793529	0.981807	1.12928	0.891262	1.15021	0.0964929	0.201893	1.0155	0.907777	0.292423	-0.139591	0.533989	0.789229	0.0221965	-0.341484	1.65372	114	12.6065	9.42236	Housekeeping	Complex IV	11		114
117127	P15954	COX7C	Cytochrome c oxidase subunit 7C, mitochondrial	324	11	1.04913	0.991819	0.799284	0.860813	1.18676	0.971561	0.7979	1.04945	0.918774	COX7C	0.884024	0.835735	0.673499	0.725345	1	0.818665	0.672333	0.884299	0.774185	0.946743	1.00638	0.922043	1.06299	0.650374	0.0881286	0.186837	0.97391	0.825266	-0.03814	0.0834059	0.916198	0.521372	-0.126269	0.282852	63	7.24082	10.272	Housekeeping	Complex IV	12		63
461804	P24311	COX7B	Cytochrome c oxidase subunit 7B, mitochondrial	325	2	0.979699	0.838303	0.721389	1.09385	1.07879	1.31432	0.726949	0.932399	0.806793	COX7B	0.745401	0.63782	0.548867	0.83225	0.820797	1	0.553098	0.709413	0.613846	0.846463	1.16232	0.822047	1.37315	0.0414758	0.457489	1.38221	0.971155	0.811142	-0.0422266	0.0909029	0.707246	0.0245577	-0.499716	1.60981	80	9.15473	10.272	Housekeeping	Complex IV	13		80
117132	P10176	COX8A	Cytochrome c oxidase subunit 8A, mitochondrial	326	4	1.04847	1.06998	0.857545	1.08003	1.03389	0.984039	1.00155	1.03208	0.936059	COX8A	0.970781	0.990698	0.794003	1	0.957286	0.911124	0.927336	0.955609	0.866699	0.991999	1.03265	0.989897	1.04098	0.607181	0.0579464	0.216682	0.997881	0.978473	-0.00305994	0.00945107	0.958595	0.341349	-0.0610063	0.466802	69	7.57421	10.2427	Housekeeping	Complex IV	14		69
117020	P00403	COX2	Cytochrome c oxidase subunit 2	327	28	1.05244	0.863497	0.742139	1.11037	1.19296	1.18307	0.79577	0.993025	1.02149	COX2	0.882209	0.723825	0.622097	0.93077	1	0.991703	0.667053	0.832401	0.856259	0.886027	1.16213	0.93676	1.31162	0.0424525	0.391355	1.3721	1.05726	0.681482	0.0803295	0.166546	0.806068	0.0406888	-0.311026	1.39053	227	25.5482	4.81787	Housekeeping	Complex IV	16		227
42560196	P99999	CYC	Cytochrome c	328	27	0.93306	0.816792	0.735183	1.17218	1.26917	1.33647	0.868829	0.95271	0.939914	CYC	0.698152	0.611156	0.550093	0.877074	0.949647	1	0.650092	0.712855	0.703281	0.828345	1.25928	0.920484	1.52023	0.00446705	0.604291	2.34998	1.11123	0.217798	0.152162	0.661946	0.730963	0.00337507	-0.452129	2.47172	105	11.7411	9.56885	Housekeeping	Complex IV(18)	18		105
114443	P00846	ATP6	ATP synthase subunit a	329	5	0.956773	0.900878	0.811365	1.24471	1.2376	1.31799	0.883836	0.932794	0.910841	ATP6	0.725934	0.683525	0.615609	0.944401	0.939006	1	0.670595	0.707741	0.691084	0.889672	1.26677	0.909157	1.42386	0.0015979	0.509804	2.79645	1.0219	0.685087	0.0312556	0.164254	0.717699	0.000259947	-0.478548	3.58512	226	24.8009	10.0962	Housekeeping	F0 motor- A	1		226
20455474	P24539	AT5F1	ATP synthase F(0) complex subunit B1, mitochondrial	330	38	0.931969	0.820412	0.746706	1.15202	1.26291	1.26825	0.873716	0.974904	0.986319	AT5F1	0.734846	0.646884	0.588769	0.908354	0.995787	1	0.688914	0.7687	0.7777	0.833029	1.22773	0.94498	1.47381	0.00389541	0.559551	2.40945	1.13439	0.158412	0.181916	0.800211	0.769699	0.00559575	-0.377634	2.25214	256	28.8903	9.36377	Housekeeping	F0 motor- B	2		256
461588	P05496	AT5G1	ATP synthase F(0) complex subunit C1, mitochondrial	331	44	0.875151	0.806614	0.861678	1.10999	1.12332	1.14898	1.21915	0.985966	0.976346	AT5G1	0.717839	0.661622	0.706787	0.910465	0.921395	0.942445	1	0.808734	0.800844	0.847814	1.12743	1.06049	1.32981	0.000304394	0.411216	3.51656	1.25085	0.0606593	0.322906	1.2171	0.940624	0.45084	-0.0883097	0.345978	136	14.2675	9.74463	Housekeeping	F0 motor- C	3		136
6831494	O75947	ATP5H	ATP synthase subunit d, mitochondrial	332	44	0.962768	0.814866	0.703498	1.16421	1.31284	1.25108	0.881996	0.955848	0.984111	ATP5H	0.733348	0.620689	0.53586	0.88679	1	0.952954	0.671823	0.728077	0.749605	0.827044	1.24271	0.940652	1.50259	0.00864427	0.587454	2.06327	1.13737	0.233525	0.185697	0.631667	0.756936	0.0046116	-0.401757	2.33615	161	18.4795	5.30029	Housekeeping	F0 motor- D	6		161
3023369	P56385	ATP5I	ATP synthase subunit e, mitochondrial	333	21	0.95833	0.768935	0.692981	1.16707	1.11317	1.33671	0.817556	0.972819	0.981934	ATP5I	0.716929	0.575242	0.518421	0.873089	0.832763	1	0.611616	0.727769	0.734587	0.806749	1.20565	0.924103	1.49446	0.0183764	0.579621	1.73574	1.14547	0.285338	0.195934	0.54464	0.766477	0.0305868	-0.383686	1.51447	69	7.92833	9.34912	Housekeeping	F0 motor- E	7		69
7404340	P56134	ATPK	ATP synthase subunit f, mitochondrial	334	8	0.939709	0.847064	0.774499	1.01036	1.16561	1.15693	0.921141	0.93306	0.964623	ATPK	0.806198	0.726716	0.664461	0.866813	1	0.99256	0.790268	0.800493	0.827572	0.853758	1.11097	0.939608	1.30127	0.0207646	0.379918	1.68268	1.10056	0.158122	0.138232	0.801009	0.845757	0.0300792	-0.241685	1.52173	94	10.9107	9.67139	Housekeeping	F0 motor- F2	8		94
114688	P18859	ATP5J	ATP synthase-coupling factor 6, mitochondrial	335	49	1.00706	0.867658	0.751625	1.14676	1.30295	1.24561	0.835484	0.956492	0.966257	ATP5J	0.772907	0.66592	0.576865	0.880126	1	0.955997	0.641227	0.734099	0.741594	0.875446	1.23177	0.919411	1.40702	0.014787	0.492645	1.83012	1.05022	0.632194	0.0706911	0.19915	0.746413	0.007311	-0.421954	2.13602	108	12.5796	9.5249	Housekeeping	F0 motor- F6	9		108
62906882	O75964	ATP5L	ATP synthase subunit g, mitochondrial	336	37	0.970561	0.854435	0.841382	1.06908	1.18088	1.17848	0.874465	0.979735	0.967567	ATP5L	0.821898	0.723559	0.712506	0.905325	1	0.997972	0.740521	0.829667	0.819363	0.888793	1.14281	0.940589	1.2858	0.0100078	0.36267	1.99966	1.05828	0.382394	0.0817175	0.417489	0.823047	0.0151856	-0.280953	1.81857	103	11.4212	9.64209	Housekeeping	F0 motor- G	10		103
114483	P03928	ATP8	ATP synthase protein 8	337	6	0.968697	0.890051	0.713741	1.02685	1.0558	1.07587	0.913523	0.876068	0.884241	ATP8	0.900385	0.827285	0.663408	0.954441	0.981344	1	0.849101	0.814288	0.821885	0.857496	1.05284	0.891277	1.22781	0.0635354	0.296085	1.19698	1.03939	0.680575	0.0557437	0.167124	0.846545	0.000891857	-0.240341	3.0497	68	7.98616	9.90576	Housekeeping	F0 motor- G8	11		68
1352049	P48047	ATPO	ATP synthase subunit O, mitochondrial	338	71	0.983063	0.885765	0.759852	1.15892	1.28454	1.17117	0.937879	0.949033	0.997362	ATPO	0.765302	0.689557	0.591535	0.902207	1	0.91174	0.730127	0.738811	0.776434	0.876227	1.20488	0.961425	1.37508	0.0123965	0.459511	1.9067	1.09723	0.273276	0.13387	0.563399	0.797944	0.00519638	-0.325641	2.2843	213	23.2627	9.96436	Housekeeping	F0 motor -O-F1-F0 connector	12		213
114517	P25705	ATPA	ATP synthase subunit alpha, mitochondrial	339	329	0.959417	0.865125	0.735246	1.12682	1.22666	1.17554	0.902829	0.964052	0.986398	ATPA	0.782139	0.70527	0.59939	0.91861	1	0.958331	0.736007	0.785918	0.804135	0.853263	1.17634	0.951093	1.37864	0.0104598	0.463244	1.98048	1.11465	0.232661	0.156597	0.633277	0.808518	0.00411462	-0.306647	2.38567	553	59.7136	9.12939	Housekeeping	F1 motor- A3	13		553
114549	P06576	ATPB	ATP synthase subunit beta, mitochondrial	340	317	0.969247	0.864783	0.751893	1.11027	1.22682	1.16052	0.90886	0.966654	0.990605	ATPB	0.790048	0.704898	0.612879	0.904995	1	0.945954	0.740826	0.787934	0.807457	0.861974	1.16587	0.955373	1.35255	0.0130068	0.435687	1.88583	1.10835	0.237427	0.148419	0.624469	0.819453	0.00716129	-0.287267	2.14501	529	56.5246	5.40186	Housekeeping	F1 motor-B3	14		529
543875	P36542	ATPG	ATP synthase subunit gamma, mitochondrial	341	63	0.980448	0.876472	0.719277	1.08818	1.24404	1.18084	0.906727	0.99389	1.0089	ATPG	0.788115	0.704536	0.578178	0.874717	1	0.949198	0.728856	0.79892	0.810988	0.858732	1.17102	0.96984	1.36366	0.0241555	0.447488	1.61698	1.12939	0.248464	0.175538	0.604736	0.828199	0.0220597	-0.271951	1.6564	298	32.9753	9.21729	Housekeeping	F1 motor-C1	15		298
584812	P30049	ATPD	ATP synthase subunit delta, mitochondrial	342	18	0.977335	0.852487	0.726673	1.10017	1.25056	1.23917	0.898807	0.934733	0.93114	ATPD	0.781515	0.681682	0.581077	0.879737	1	0.990889	0.718721	0.747449	0.744576	0.852165	1.19663	0.92156	1.40423	0.0167013	0.489776	1.77725	1.08143	0.397131	0.112945	0.401066	0.770127	0.00519963	-0.376831	2.28403	168	17.4792	5.49072	Housekeeping	F1 motor-D1	16		168
3023354	P56381	ATP5E	ATP synthase subunit epsilon, mitochondrial	343	24	0.974379	0.841318	0.804938	1.10185	1.14012	1.13119	0.892921	0.948686	0.976251	ATP5E	0.854627	0.73792	0.706011	0.966435	1	0.992169	0.783181	0.832093	0.85627	0.873545	1.12439	0.939286	1.28716	0.00895376	0.364188	2.04799	1.07526	0.313245	0.104683	0.504116	0.835375	0.00240262	-0.259505	2.61931	51	5.77611	9.92041	Housekeeping	F1 motor-E1	17		51
12585262	Q9UII2	ATIF1	ATPase inhibitor, mitochondrial	344	19	0.829075	0.765392	0.644985	1.30645	1.39465	1.38221	0.812255	0.933874	0.9531	ATIF1	0.594469	0.548806	0.462471	0.936757	1	0.99108	0.582408	0.669612	0.683398	0.746484	1.3611	0.899743	1.82335	0.000532317	0.866591	3.27383	1.20531	0.0927666	0.269401	1.03261	0.661041	0.000891467	-0.597189	3.04989	106	12.2413	9.34912	Housekeeping	IF1	18		106
170652901	Q5TC12	ATPF1	ATP synthase mitochondrial F1 complex assembly factor 1	345	1	1.25335	0.839577	1.08177	1.37861	1.40051	1.49624	0.851087	0.811132	0.945888	ATPF1	0.837667	0.561127	0.722995	0.921386	0.936022	1	0.568819	0.542115	0.632178	1.05823	1.42512	0.869369	1.3467	0.0429362	0.429426	1.36718	0.82153	0.209733	-0.283615	0.678332	0.610033	0.000497814	-0.713041	3.30293	328	36.4136	7.95752	Housekeeping	F1 complex AF1 1	20		328
73917623	Q8N5M1	ATPF2	ATP synthase mitochondrial F1 complex assembly factor 2	346	5	0.836888	0.842574	0.623746	1.077	1.22448	1.31568	0.800965	1.00242	0.925227	ATPF2	0.63609	0.640412	0.474088	0.818587	0.930688	1	0.608786	0.761909	0.703234	0.767736	1.20572	0.909539	1.57049	0.01192	0.65121	1.92372	1.1847	0.201598	0.244525	0.695514	0.754354	0.0312251	-0.406686	1.5055	289	32.7519	7.09326	Housekeeping	F1 complex AF 2	21		289
3023202	P56378	68MP	6.8 kDa mitochondrial proteolipid	347	3	0.980975	0.743059	0.752146	1.02718	1.06467	1.08485	1.0206	0.908662	0.934122	68MP	0.904247	0.68494	0.693315	0.946834	0.981392	1	0.940774	0.83759	0.861058	0.825393	1.0589	0.954462	1.2829	0.0427408	0.359411	1.36916	1.15637	0.203032	0.209606	0.692435	0.901372	0.0509181	-0.149805	1.29313	58	6.65759	10.0815	Housekeeping	MLQ Protein	23		58
74751949	Q96IX5	USMG5	Up-regulated during skeletal muscle growth protein 5	348	4	0.957107	0.926236	0.872338	1.1716	0.999305	1.17339	0.88414	0.936861	0.935188	USMG5	0.815676	0.789367	0.743434	0.998476	0.851639	1	0.753492	0.798422	0.796996	0.91856	1.11477	0.918729	1.2136	0.0354173	0.279294	1.45079	1.00018	0.9958	0.000265735	0.00182799	0.824146	0.0312971	-0.279029	1.5045	58	6.45337	9.75928	Housekeeping	DAPIT	24		58
12230759	Q15904	VAS1	V-type proton ATPase subunit S1	349	4	0.968467	0.824367	0.772725	1.08965	1.19938	1.12803	1.262	1.02552	0.987886	VAS1	0.767404	0.653221	0.612299	0.863432	0.950377	0.893842	1	0.812615	0.782792	0.855186	1.13902	1.0918	1.3319	0.0131764	0.413485	1.8802	1.27669	0.0849857	0.352404	1.07065	0.958546	0.63346	-0.061081	0.198281	470	51.9926	6.13818	Housekeeping	V1-S1 (optional)	1		470
22096378	P38606	VATA	V-type proton ATPase catalytic subunit A	350	82	0.872838	0.778955	0.796351	1.02291	1.06504	1.023	1.18897	1.06498	1.08747	VATA	0.734111	0.65515	0.669781	0.860335	0.895764	0.860409	1	0.895713	0.91463	0.816048	1.03699	1.11381	1.27074	0.00232604	0.34567	2.63338	1.36488	0.00338605	0.448773	2.47031	1.07408	0.131686	0.103104	0.880459	617	68.2605	5.51611	Housekeeping	V1-A	2		617
12643271	P21281	VATB2	V-type proton ATPase subunit B, brain isoform	351	70	0.863876	0.82459	0.848315	1.05686	1.08147	1.04523	1.15122	0.984633	0.989368	VATB2	0.750399	0.716273	0.736882	0.918029	0.93941	0.907928	1	0.855294	0.859407	0.845594	1.06118	1.04174	1.25496	0.00016051	0.327638	3.7945	1.23196	0.0247473	0.30096	1.60647	0.981678	0.745035	-0.0266779	0.127823	511	56.4649	5.80811	Housekeeping	V1-B2	3		511
401329	P21283	VATC1	V-type proton ATPase subunit C 1	352	30	0.897363	0.792474	0.88235	1.04069	1.05899	1.0474	1.2381	1.03863	1.04228	VATC1	0.724793	0.640075	0.712667	0.840559	0.855338	0.84598	1	0.838896	0.841838	0.857396	1.04903	1.10633	1.22351	0.00446375	0.291021	2.3503	1.29034	0.0277008	0.367755	1.55751	1.05463	0.434911	0.0767335	0.3616	382	43.914	7.45947	Housekeeping	V1-C1	5		382
10720351	Q9Y5K8	VATD	V-type proton ATPase subunit D	353	5	0.890432	0.858817	0.870744	1.0269	1.04161	0.927951	1.21605	1.02298	0.916878	VATD	0.732233	0.706235	0.716042	0.844455	0.856551	0.763086	1	0.841232	0.75398	0.873331	0.99882	1.05197	1.14369	0.0271635	0.193697	1.56601	1.20455	0.112378	0.268493	0.949317	1.05321	0.60409	0.0747957	0.218899	247	28.2453	9.36377	Housekeeping	V1-D	7		247
549207	P36543	VATE1	V-type proton ATPase subunit E 1	354	31	0.886056	0.837	0.854444	1.07187	1.03872	1.07198	1.15153	0.975087	1.01959	VATE1	0.769461	0.72686	0.742009	0.930823	0.902035	0.930917	1	0.846777	0.88542	0.859167	1.06086	1.04873	1.23475	0.000371342	0.304218	3.43023	1.22064	0.0259677	0.287639	1.58557	0.988574	0.833761	-0.016579	0.0789582	226	26.1288	8.00146	Housekeeping	V1-E1	8		226
126302612	Q16864	VATF	V-type proton ATPase subunit F	355	9	0.93906	0.86163	0.88072	0.980822	1.18706	1.0938	1.15708	1.04844	0.964037	VATF	0.791081	0.725852	0.741934	0.826262	1	0.921439	0.974744	0.883227	0.812122	0.893803	1.08723	1.05652	1.21641	0.0391002	0.282626	1.40782	1.18205	0.0547662	0.241291	1.26149	0.971755	0.726139	-0.0413353	0.13898	119	13.362	5.51611	Housekeeping	V1-F	10		119
6226299	O75348	VATG1	V-type proton ATPase subunit G 1	356	17	0.82841	0.764861	0.828173	1.05944	1.12554	1.10012	1.22694	1.06807	1.06347	VATG1	0.675181	0.623387	0.674989	0.863479	0.917354	0.896638	1	0.870512	0.866765	0.807148	1.09504	1.1195	1.35667	0.00054747	0.440073	3.26164	1.38698	0.00565982	0.471944	2.2472	1.02234	0.690366	0.0318707	0.160921	118	13.7491	8.79248	Housekeeping	V1-G1	11		118
12643371	Q9UI12	VATH	V-type proton ATPase subunit H	357	20	0.910204	0.852879	0.871676	1.039	1.0774	1.0971	1.25923	1.00228	1.01481	VATH	0.722823	0.6773	0.692227	0.825105	0.855597	0.871246	1	0.795941	0.805894	0.878253	1.07117	1.09211	1.21966	0.00129885	0.286474	2.88644	1.2435	0.0663198	0.314405	1.17836	1.01955	0.818295	0.0279306	0.08709	483	55.8471	6.48096	Housekeeping	V1-H	14		483
59803038	Q93050	VPP1	V-type proton ATPase 116 kDa subunit a isoform 1	358	29	0.801174	0.792275	0.67026	1.15334	1.16257	1.26023	1.16049	0.969621	0.941742	VPP1	0.635735	0.628673	0.531854	0.915177	0.922502	1	0.920854	0.769398	0.747276	0.75457	1.19205	1.02395	1.57977	0.00129267	0.659713	2.88851	1.357	0.0288649	0.440421	1.53963	0.858986	0.0937619	-0.219293	1.02797	837	96.3501	6.43018	Housekeeping	V0 motor--a1	15		837
172046607	Q9Y487	VPP2	V-type proton ATPase 116 kDa subunit a isoform 2	359	2	0.997577	0.905041	0.87983	1.02174	1.10982	1.09753	1.03533	1.02208	0.980406	VPP2	0.898867	0.815488	0.792771	0.920637	1	0.988928	0.932884	0.920943	0.883395	0.927483	1.07636	1.0126	1.16052	0.0300347	0.214769	1.52238	1.09178	0.0970462	0.126678	1.01302	0.940767	0.118213	-0.0880906	0.927333	856	98.0183	6.60986	Housekeeping	V0 motor--a2	16		856
223634720	Q13488	VPP3	V-type proton ATPase 116 kDa subunit a isoform 3	360	31	0.885013	0.884709	0.919827	1.03792	1.0751	1.04287	1.13906	0.98975	1.06104	VPP3	0.77697	0.776703	0.807534	0.911212	0.943855	0.915556	1	0.868921	0.931505	0.896517	1.05197	1.06328	1.17339	0.000705071	0.230685	3.15177	1.18601	0.0202297	0.246121	1.69401	1.01076	0.812482	0.015436	0.0901862	830	92.9084	7.12256	Housekeeping	V0 motor--a3	17		830
137479	P27449	VATL	V-type proton ATPase 16 kDa proteolipid subunit	361	18	0.832659	0.728393	0.726205	1.21755	1.11527	1.23353	1.12338	0.898677	0.922437	VATL	0.675019	0.590492	0.588719	0.987044	0.904122	1	0.910697	0.728538	0.7478	0.762419	1.18878	0.981497	1.55923	0.00112377	0.640831	2.94932	1.28735	0.0509955	0.3644	1.29247	0.825631	0.0612872	-0.276432	1.21263	155	15.7255	8.44092	Housekeeping	V0 motor--c	20		155
47606646	P61421	VA0D1	V-type proton ATPase subunit d 1	362	39	0.786889	0.758254	0.70994	1.20704	1.24919	1.16519	1.2468	0.991	1.01135	VA0D1	0.629919	0.606996	0.56832	0.966261	1	0.932755	0.998089	0.793314	0.809603	0.751694	1.20714	1.08305	1.60589	0.000160667	0.683376	3.79407	1.44081	0.0176366	0.526883	1.75358	0.897203	0.220726	-0.156494	0.656147	351	40.3032	4.99561	Housekeeping	V0 motor--d1	21		351
114374	P05023	AT1A1	Sodium/potassium-transporting ATPase subunit alpha-1	363	151	1.10147	0.896159	0.883909	1.10888	1.14051	1.1142	0.855336	0.949575	0.92726	AT1A1	0.965771	0.785754	0.775012	0.972267	1	0.97693	0.74996	0.832588	0.813023	0.960513	1.1212	0.910724	1.16729	0.087117	0.223161	1.0599	0.948164	0.548555	-0.0767916	0.26078	0.812279	0.00219215	-0.299953	2.65913	1023	112.824	5.49072	Housekeeping	Na-Kteansporting ATPase	1		1023
116241260	P13637	AT1A3	Sodium/potassium-transporting ATPase subunit alpha-3	364	67	1.14255	1.02151	0.949774	1.17983	1.11557	1.18084	0.950179	0.929009	1.02882	AT1A3	0.967577	0.865073	0.804323	0.999145	0.944732	1	0.804665	0.786738	0.871262	1.03795	1.15875	0.969336	1.11638	0.115472	0.158834	0.937524	0.933898	0.343574	-0.0986628	0.46398	0.836538	0.00706021	-0.257497	2.15118	1013	111.677	5.37646	Housekeeping	Na-Kteansporting ATPase	4		1013
114392	P05026	AT1B1	Sodium/potassium-transporting ATPase subunit beta-1	365	12	1.26637	1.09735	1.07651	0.913139	1.016	0.948583	0.820762	0.905247	0.904059	AT1B1	1	0.86653	0.850069	0.721066	0.802291	0.749054	0.64812	0.714834	0.713896	1.14674	0.959241	0.876689	0.836491	0.0494301	-0.257578	1.30601	0.764503	0.0151854	-0.387405	1.81857	0.913941	0.115221	-0.129827	0.938468	303	35.0389	8.52881	Housekeeping	Na-Kteansporting ATPase	5		303
1703470	P54709	AT1B3	Sodium/potassium-transporting ATPase subunit beta-3	366	36	1.11256	0.85346	0.820869	1.1632	1.17249	1.18366	0.862995	0.899885	0.896112	AT1B3	0.939933	0.721037	0.693502	0.982714	0.990569	1	0.729092	0.760258	0.75707	0.928963	1.17312	0.886331	1.26282	0.0575561	0.336653	1.23991	0.954108	0.670523	-0.0677758	0.173586	0.755535	2.59701e-05	-0.404429	4.58553	279	31.4921	8.35303	Housekeeping	Na-Kteansporting ATPase	6		279
74752322	Q9BT23	LIMD2	LIM domain-containing protein 2	367	2	0.452485	1.02225	2.01027	0.402841	0.576199	0.558504	1.16529	1.2662	1.14522	LIMD2	0.225086	0.508511	1	0.200391	0.286627	0.277825	0.579668	0.629863	0.569684	1.16167	0.512514	1.19224	0.441188	0.229667	-1.18053	0.638901	1.02631	0.949836	0.0374726	0.0223513	2.32625	0.000519016	1.21801	3.28482	127	14.0609	9.02686					127
730163	P40261	NNMT	Nicotinamide N-methyltransferase	368	17	0.515429	0.580789	0.572628	0.727935	0.693937	0.74566	1.97362	1.43296	1.56671	NNMT	0.261159	0.294276	0.290141	0.368833	0.351606	0.377814	1	0.726059	0.793828	0.556282	0.722511	1.65777	1.29882	0.00288243	0.377203	2.54024	2.98008	0.00255126	1.57535	2.59324	2.29445	0.00459981	1.19815	2.33726	264	29.5551	5.74463	Known CRC biomarkers	Markers	2602		264
115601	P26447	S10A4	Protein S100-A4	369	26	0.512029	0.544214	0.725307	0.753029	0.71039	0.679496	1.89684	1.38495	1.39779	S10A4	0.269938	0.286905	0.382376	0.396991	0.374512	0.358225	1	0.730136	0.736906	0.59385	0.714305	1.55986	1.20284	0.159114	0.266441	0.798292	2.62669	0.00595252	1.39325	2.2253	2.18375	0.00761039	1.12681	2.11859	101	11.7207	6.11279					101
13626142	Q9NY30	BTG4	Protein BTG4	370	1	0.47735	0.420416	0.650011	0.703021	0.506059	0.596363	1.13569	1.44481	1.32431	BTG4	0.330389	0.290983	0.449894	0.486584	0.35026	0.412762	0.786046	1	0.916599	0.515925	0.601814	1.3016	1.16648	0.391437	0.222156	0.407338	2.52285	0.00227731	1.33506	2.64258	2.1628	0.00277153	1.1129	2.55728	223	25.953	8.57275	Folding, sorting and degradation	RNA degradation	37		223
341941102	Q8TBF8	FA81A	Protein FAM81A	371	1	0.461169	0.585003	0.920846	0.89538	0.688254	0.741548	1.37238	1.49068	1.68417	FA81A	0.273826	0.347354	0.546765	0.531645	0.408661	0.440305	0.814873	0.88511	1	0.655673	0.775061	1.51574	1.18208	0.472588	0.241333	0.325517	2.31174	0.00641383	1.20898	2.19288	1.95564	0.00253988	0.967644	2.59519	368	42.3651	8.92432					368
251757514	O43556	SGCE	Epsilon-sarcoglycan	372	5	1.21343	1.0966	0.693551	1.45348	1.57454	1.57137	0.631478	0.809342	0.8555	SGCE	0.77066	0.696458	0.440478	0.923112	1	0.997989	0.401056	0.514018	0.543333	1.0012	1.53313	0.76544	1.5313	0.0306529	0.614756	1.51353	0.764526	0.241553	-0.387363	0.616988	0.499266	0.0006298	-1.00212	3.2008	437	49.8191	6.55127	ECM	cytoskeleton	5		437
121940114	Q08EQ4	TMSL1	Putative thymosin beta-4-like protein 1	374	100	0.619968	0.720823	0.993811	0.834647	0.619986	0.696216	1.37359	1.38072	1.42765	TMSL1	0.434258	0.504903	0.696118	0.584631	0.434271	0.487667	0.962132	0.967131	1	0.7782	0.716949	1.39398	0.921291	0.657573	-0.11827	0.182056	1.79129	0.00549939	0.841001	2.25969	1.94433	0.000482078	0.959271	3.31688	44	5.06747	5.05908
1706298	P51397	DAP1	Death-associated protein 1	375	6	0.570654	0.719565	1.06323	0.724244	0.665618	0.699814	1.18585	1.37732	1.36649	DAP1	0.41432	0.522437	0.771957	0.525834	0.483268	0.508096	0.860981	1	0.992133	0.784485	0.696558	1.30989	0.887919	0.581577	-0.171501	0.235393	1.66974	0.0295334	0.739627	1.52969	1.88051	0.000677982	0.911128	3.16878	102	11.1577	9.31982					102
215273871	Q99952	PTN18	Tyrosine-protein phosphatase non-receptor type 18	376	1	0.832827	1.59882	2.08079	0.843889	0.798481	0.727051	1.679	1.44037	1.31644	PTN18	0.400245	0.76837	1	0.405561	0.383739	0.34941	0.806905	0.692221	0.632663	1.50415	0.789807	1.4786	0.525086	0.121917	-0.929373	0.913937	0.983019	0.949451	-0.0247087	0.0225272	1.87211	0.00351076	0.904665	2.4546	460	50.4505	8.25049					460
14195002	O00625	PIR	Pirin	377	5	0.561232	0.599097	0.825315	0.836959	0.656186	0.776372	1.27305	1.32464	1.64664	PIR	0.340834	0.363829	0.50121	0.508282	0.398499	0.471487	0.773118	0.804447	1	0.661881	0.756506	1.41478	1.14296	0.389281	0.192778	0.409737	2.13751	0.00623894	1.09593	2.20489	1.87015	0.0068523	0.903153	2.16416	290	32.0933	6.91748					290	Flavonoid metabolism
586000	P37802	TAGL2	Transgelin-2	378	213	0.715132	0.802105	0.980701	0.770796	0.777618	0.710243	1.55499	1.18304	1.26223	TAGL2	0.459895	0.515827	0.63068	0.495692	0.500079	0.456751	1	0.760801	0.811726	0.832646	0.752886	1.33342	0.904208	0.380777	-0.145273	0.419329	1.60142	0.0219269	0.679352	1.65902	1.77108	0.00726947	0.824626	2.1385	199	22.3772	8.25049					199
158705883	Q9H008	LHPP	Phospholysine phosphohistidine inorganic pyrophosphate phosphatase	379	2	0.748409	0.840349	0.762951	0.856735	0.710884	0.780642	1.53263	1.1754	1.40594	LHPP	0.488316	0.548304	0.497804	0.558995	0.463832	0.509347	1	0.766918	0.917337	0.783903	0.782754	1.37133	0.998534	0.983056	-0.0021169	0.00742153	1.74936	0.00561846	0.806825	2.25038	1.75193	0.00642242	0.808942	2.1923	270	29.1469	6.15088	Energy metabolism	Oxidative phosphorylation	564		270
59800384	Q13642	FHL1	Four and a half LIM domains protein 1	380	26	0.649572	0.639766	0.709655	0.938875	0.718242	0.791231	1.58557	1.30722	1.35561	FHL1	0.409677	0.403492	0.44757	0.592136	0.452986	0.499019	1	0.824448	0.854965	0.666331	0.816116	1.41613	1.22479	0.0939548	0.292536	1.02708	2.12527	0.00106828	1.08765	2.97132	1.73521	0.00507388	0.795112	2.29466	323	36.2386	8.96826					323
38257783	Q9P1F3	ABRAL	Costars family protein ABRACL	382	3	0.791999	0.705244	1.48335	0.744199	0.833955	0.779667	1.12554	1.49389	1.4013	ABRAL	0.530159	0.472085	0.992944	0.498161	0.558244	0.521904	0.753425	1	0.938019	0.993531	0.78594	1.34024	0.791058	0.448921	-0.338145	0.34783	1.34897	0.268287	0.431856	0.571401	1.70527	0.00818117	0.770001	2.08718	81	9.05086	6.29053					81
60390165	Q15555	MARE2	Microtubule-associated protein RP/EB family member 2	383	11	0.75064	0.889172	1.02388	0.687749	0.714851	0.674382	1.13001	1.16476	1.22487	MARE2	0.612834	0.725934	0.835915	0.561489	0.583616	0.550576	0.922562	0.950933	1	0.887898	0.692327	1.17322	0.779737	0.0703278	-0.358941	1.15287	1.32134	0.0269612	0.402001	1.56926	1.6946	9.03827e-05	0.760942	4.04391	327	37.0082	5.56689					327
7531045	O00244	ATOX1	Copper transport protein ATOX1	384	8	0.534813	0.670536	1.12435	0.856797	0.742519	0.721542	1.39382	1.26735	1.25517	ATOX1	0.383704	0.481079	0.806669	0.614713	0.532724	0.517673	1	0.909266	0.900527	0.776566	0.773619	1.30545	0.996205	0.987933	-0.00548496	0.00527265	1.68105	0.0450418	0.749362	1.34638	1.68745	0.000958234	0.754847	3.01853	68	7.39674	7.23975	Digestive_metabolism	Mineral absorption	2380		68
32700008	Q96PM5	ZN363	RING finger and CHY zinc finger domain-containing protein 1	385	1	0.761926	0.884188	1.11097	0.742065	0.593514	0.818594	1.06646	1.31517	1.22505	ZN363	0.579336	0.6723	0.844735	0.564235	0.451283	0.622425	0.810889	1	0.931476	0.919028	0.718058	1.20223	0.781323	0.174136	-0.35601	0.759113	1.30815	0.0869495	0.387526	1.06073	1.67427	0.0078815	0.743536	2.10339	261	30.0898	6.7124	Folding, sorting and degradation	Ubiquitin mediated proteolysis	59		261	Protein modification
118276	P07108	ACBP	Acyl-CoA-binding protein	386	36	0.655595	0.805251	1.12676	0.807165	0.789768	0.704003	1.16896	1.29221	1.36368	ACBP	0.480754	0.590499	0.826267	0.591902	0.579145	0.516252	0.857212	0.947588	1	0.862537	0.766979	1.27495	0.889213	0.539509	-0.169399	0.268002	1.47814	0.0515808	0.563782	1.28751	1.6623	0.00146375	0.733182	2.83453	87	10.038	6.56592					87
3183522	P07902	GALT	Galactose-1-phosphate uridylyltransferase	387	5	0.749418	0.816449	0.874632	0.940502	0.754723	0.908605	1.42524	1.39948	1.49525	GALT	0.501199	0.546028	0.58494	0.628993	0.504747	0.607661	0.953178	0.935952	1	0.8135	0.867943	1.43999	1.06693	0.467039	0.0934588	0.330647	1.77012	0.000170083	0.823846	3.76934	1.65908	0.000871416	0.730387	3.05977	379	43.3356	6.99072	Carbohydrate metabolism	Amino sugar and nucleotide sugar metabolism	239		379	Carbohydrate metabolism
21431782	Q9H2X6	HIPK2	Homeodomain-interacting protein kinase 2	388	1	1.1766	1.32024	1.19078	0.912937	0.660119	0.730308	1.12975	1.36504	1.30918	HIPK2	0.861951	0.967182	0.872344	0.6688	0.48359	0.53501	0.827634	1	0.959082	1.22921	0.767788	1.26799	0.624621	0.00635805	-0.678947	2.19668	1.03155	0.669776	0.0448173	0.174071	1.65149	0.0084476	0.723764	2.07327	1198	130.883	8.42627					1198
118607	P15559	NQO1	NAD(P)H dehydrogenase [quinone] 1	389	39	0.645087	0.709534	1.00641	0.874694	0.749173	0.782421	1.20625	1.32845	1.41142	NQO1	0.457049	0.50271	0.713052	0.619727	0.530794	0.554351	0.854639	0.941217	1	0.787012	0.802096	1.31537	1.01917	0.903992	0.0273896	0.0438355	1.67135	0.0138498	0.741016	1.85856	1.63992	0.00188411	0.713626	2.72489	274	30.848	8.88037					274
74740479	Q53GG5	PDLI3	PDZ and LIM domain protein 3	390	1	0.957725	1.00643	0.833325	0.799235	0.771995	0.807654	1.29851	1.23978	1.3221	PDLI3	0.724397	0.76124	0.630304	0.60452	0.583916	0.610888	0.982161	0.937733	1	0.932494	0.792961	1.2868	0.850366	0.0569746	-0.233845	1.24432	1.37995	0.00342214	0.464616	2.4657	1.62277	5.05681e-05	0.698461	4.29612	364	39.2074	6.88818					364
311033453	Q9NX05	F120C	Constitutive coactivator of PPAR-gamma-like protein 2	392	4	0.973525	1.38271	1.41781	0.785784	0.672115	0.755219	1.07765	1.14341	1.36295	F120C	0.68664	0.975241	1	0.554223	0.474051	0.532666	0.760078	0.806459	0.961303	1.25801	0.737706	1.19467	0.586405	0.0238129	-0.77003	1.62319	0.949645	0.723194	-0.0745403	0.140745	1.61943	0.00787594	0.695489	2.1037	1096	120.511	9.02686					1096
1706278	P04080	CYTB	Cystatin-B	393	48	0.524777	0.564628	0.995883	0.938116	0.747639	0.824146	1.51775	1.21649	1.30049	CYTB	0.345759	0.372016	0.656156	0.618095	0.492596	0.543004	1	0.801505	0.856851	0.695096	0.836634	1.34491	1.20362	0.428095	0.267384	0.36846	1.93485	0.0207951	0.952225	1.68204	1.60753	0.00852196	0.684841	2.06946	98	11.1326	7.56201	Energy metabolism	Oxidative phosphorylation	485		98
160113240	P19532	TFE3	Transcription factor E3	394	4	0.836536	1.08907	1.14309	0.86008	0.674877	0.642793	1.15715	1.08201	1.23714	TFE3	0.676186	0.880312	0.923978	0.695217	0.545515	0.51958	0.935341	0.874605	1	1.0229	0.725917	1.15876	0.709667	0.0629768	-0.494786	1.20082	1.13282	0.263621	0.179925	0.57902	1.59628	0.0059602	0.67471	2.22474	575	61.4837	5.57959					575
74721018	Q9UKY7	CDV3	Protein CDV3 homolog	395	25	0.889546	1.00242	1.29201	0.810873	0.66986	0.695782	1.1369	1.1654	1.14853	CDV3	0.688498	0.775858	1	0.627606	0.518464	0.538527	0.879945	0.902005	0.888949	1.06132	0.725505	1.15028	0.683585	0.057888	-0.548807	1.23741	1.08381	0.500167	0.116115	0.300885	1.58548	0.000650707	0.664922	3.18661	258	27.3184	6.40479					258
20981682	P09104	ENOG	Gamma-enolase	396	104	0.641848	0.679709	0.957004	0.920588	0.812842	0.847117	1.47917	1.29327	1.31681	ENOG	0.433925	0.459522	0.646988	0.62237	0.549527	0.572699	1	0.874323	0.890237	0.75952	0.860183	1.36308	1.13253	0.389156	0.179555	0.409876	1.79466	0.00635502	0.843712	2.19688	1.58464	0.00164084	0.664157	2.78493	434	47.239	5.03369	Folding, sorting and degradation	RNA degradation	59		434	Carbohydrate degradation
28380824	Q9Y3A5	SBDS	Ribosome maturation protein SBDS	397	34	0.763889	0.8449	1.14245	0.829129	0.755912	0.791187	1.16829	1.27789	1.30305	SBDS	0.58623	0.6484	0.876749	0.636297	0.580108	0.607179	0.896578	0.980686	1	0.91708	0.792076	1.24974	0.863694	0.345571	-0.211409	0.461462	1.36274	0.0529796	0.446512	1.27589	1.57781	0.000595604	0.657921	3.22504	250	28.7453	8.74854	Tanslation regulation	Ribosome biogenesis	50		250
47117699	P61296	HAND2	Heart- and neural crest derivatives-expressed protein 2	398	1	0.832284	0.871622	1.21993	0.809508	0.809998	0.825776	1.19209	1.34206	1.31584	HAND2	0.620153	0.649465	0.908996	0.603182	0.603547	0.615304	0.888255	1	0.980463	0.974612	0.815094	1.28333	0.836327	0.265401	-0.257861	0.576097	1.31676	0.0788322	0.396996	1.1033	1.57446	0.000549413	0.654857	3.2601	217	23.651	9.17334					217
74748871	Q6K0P9	IFIX	Pyrin and HIN domain-containing protein 1	399	2	0.973074	1.0143	0.932073	0.704411	0.804732	0.815544	1.36797	1.21667	1.06197	IFIX	0.711326	0.741461	0.681354	0.514931	0.588266	0.59617	1	0.889395	0.77631	0.973149	0.774896	1.21554	0.796277	0.00963762	-0.328658	2.01603	1.24908	0.0569871	0.320862	1.24422	1.56865	0.00980282	0.64952	2.00865	492	55.0308	9.80322					492
76803797	Q99698	LYST	Lysosomal-trafficking regulator	400	1	0.880327	0.629324	0.913509	0.897432	0.774288	0.852892	1.26046	1.3326	1.35314	LYST	0.65058	0.465084	0.675102	0.663221	0.572215	0.630305	0.931507	0.98482	1	0.80772	0.841537	1.3154	1.04187	0.744099	0.059172	0.128369	1.62854	0.00569096	0.703576	2.24481	1.56309	0.000487095	0.644404	3.31239	3801	428.866	6.60986					3801
13632176	Q9Y5Y2	NUBP2	Cytosolic Fe-S cluster assembly factor NUBP2	401	5	0.753953	0.899304	1.23879	0.721837	0.681968	0.624857	1.00108	1.06843	1.09942	NUBP2	0.608622	0.725955	1	0.582696	0.550513	0.50441	0.808114	0.862481	0.887499	0.964015	0.676221	1.05631	0.701463	0.120714	-0.511561	0.918241	1.09574	0.563021	0.131909	0.249475	1.56208	0.00071349	0.643469	3.14661	271	28.8068	5.8335					271
167012004	Q7Z6K3	PTAR1	Protein prenyltransferase alpha subunit repeat-containing protein 1	402	3	0.867853	1.08139	1.12681	0.774878	0.796991	0.77437	1.1823	1.17909	1.27447	PTAR1	0.680954	0.848501	0.884139	0.608002	0.625352	0.607603	0.927683	0.925166	1	1.02535	0.78208	1.21195	0.762745	0.0386263	-0.390727	1.41312	1.18199	0.0951182	0.241221	1.02174	1.54966	0.000180852	0.631948	3.74268	402	46.376	6.99072					402
317373448	Q9BRF8	CPPED	Serine/threonine-protein phosphatase CPPED1	403	14	0.674469	0.751076	0.801897	0.910999	0.789782	0.856136	1.50823	1.20296	1.24827	CPPED	0.447194	0.497987	0.531682	0.60402	0.52365	0.567644	1	0.797602	0.82764	0.742481	0.852305	1.31982	1.14792	0.0975489	0.199017	1.01078	1.77758	0.00481322	0.829915	2.31756	1.54853	0.00993687	0.630898	2.00275	314	35.5259	6.20166					314
1708307	P54652	HSP72	Heat shock-related 70 kDa protein 2	404	378	0.749629	0.744329	0.772426	0.840261	0.822101	0.841701	1.21812	1.27844	1.37031	HSP72	0.547051	0.543183	0.563687	0.61319	0.599938	0.614241	0.888935	0.932958	1	0.755461	0.834687	1.28896	1.10487	0.00176258	0.143878	2.75385	1.70618	0.000291847	0.770773	3.53484	1.54424	0.000527744	0.626895	3.27758	639	69.9779	5.74463	Transcriptional Regulation	Prp19	9		639
190359882	Q5TCQ9	MAGI3	Membrane-associated guanylate kinase, WW and PDZ domain-containing protein 3	405	1	1.03171	1.26769	1.53696	0.709736	0.709198	0.631534	1.0007	1.02263	1.12139	MAGI3	0.671264	0.824804	1	0.461778	0.461428	0.410897	0.651088	0.66536	0.729614	1.27879	0.683489	1.04824	0.534482	0.015925	-0.903787	1.79792	0.819714	0.200569	-0.286808	0.697737	1.53366	0.0012924	0.616979	2.8886	1506	165.506	8.01611	TGF	TGF-Bindings(8)	8		1506
114074	P07741	APT	Adenine phosphoribosyltransferase	406	16	0.669749	0.810204	0.967472	0.883044	0.79709	0.849297	1.39568	1.23322	1.23985	APT	0.479873	0.580509	0.693192	0.632699	0.571113	0.608519	1	0.8836	0.888352	0.815808	0.843144	1.28958	1.03351	0.775401	0.0475489	0.110473	1.58074	0.00938961	0.660604	2.02735	1.52949	0.00160136	0.613055	2.79551	180	19.5954	6.02393	NucleotideMetabolism	Purine metabolism	1157		180	Purine metabolism
2497677	Q15942	ZYX	Zyxin	407	135	0.832354	1.01226	1.24579	0.845136	0.713544	0.738854	1.29676	1.06892	1.14633	ZYX	0.641874	0.780611	0.960696	0.651731	0.550254	0.569772	1	0.824304	0.884002	1.03013	0.765845	1.17067	0.743442	0.104508	-0.427708	0.980851	1.13642	0.363291	0.184502	0.439746	1.5286	0.00658947	0.61221	2.18115	572	61.2382	6.66846	ECM	regulator	94		572
27805669	Q9NVE7	PANK4	Pantothenate kinase 4	408	13	0.701624	0.809609	1.08186	0.850797	0.719892	0.775089	1.17257	1.1981	1.20666	PANK4	0.581458	0.670949	0.896569	0.705082	0.596597	0.642341	0.971746	0.992901	1	0.864363	0.781926	1.19244	0.904627	0.527636	-0.144606	0.277666	1.37956	0.0446384	0.464212	1.35029	1.52501	0.000474621	0.608817	3.32365	773	85.937	6.27783					773	Cofactor biosynthesis
74753513	Q9Y5Z4	HEBP2	Heme-binding protein 2	409	14	0.750486	0.7736	1.10387	0.889322	0.784947	0.822911	1.23518	1.23326	1.33645	HEBP2	0.561553	0.578848	0.825974	0.665438	0.587339	0.615745	0.924225	0.922788	1	0.875986	0.832393	1.26829	0.950236	0.730843	-0.0736422	0.136176	1.44785	0.0301175	0.53391	1.52118	1.52367	0.000676763	0.607552	3.16956	205	22.8612	4.62744					205
116241254	Q5SW96	ARH	Low density lipoprotein receptor adapter protein 1	410	4	0.774226	0.737909	0.707707	0.828659	0.825672	0.867717	1.46804	1.17327	1.2014	ARH	0.527388	0.502649	0.482076	0.564467	0.562432	0.591072	1	0.799209	0.818368	0.739947	0.840683	1.2809	1.13614	0.0128189	0.184139	1.89215	1.73107	0.00485672	0.791665	2.31366	1.52364	0.00974009	0.607527	2.01144	308	33.8642	6.69775	cellProcess	Endocytosis	71		308
20141815	Q9Y617	SERC	Phosphoserine aminotransferase	411	8	0.763455	0.793194	0.82287	0.807716	0.874397	0.83447	1.36107	1.23655	1.23554	SERC	0.560922	0.582772	0.604575	0.593441	0.642432	0.613097	1	0.908509	0.907771	0.793173	0.838861	1.27772	1.0576	0.152204	0.0807958	0.817574	1.6109	0.000424284	0.687864	3.37234	1.52316	0.000671845	0.607068	3.17273	370	40.3968	7.66455	AminoAcid metbolism	Glycine, serine and threonine metabolism	1456		370	Amino-acid biosynthesis
41016932	Q9Y2V2	CHSP1	Calcium-regulated heat stable protein 1	412	10	0.745757	0.890185	1.20017	0.901797	0.799441	0.795904	1.19154	1.27907	1.32824	CHSP1	0.561463	0.670199	0.903576	0.678941	0.60188	0.599217	0.897081	0.962984	1	0.945369	0.832381	1.26628	0.880482	0.460319	-0.183635	0.336941	1.33946	0.083471	0.421651	1.07846	1.52128	0.00120825	0.605286	2.91784	147	15.882	8.20654					147
20138912	P58546	MTPN	Myotrophin	413	23	0.698568	0.787452	1.15597	0.907714	0.750768	0.805405	1.31297	1.19237	1.24019	MTPN	0.532051	0.599748	0.880422	0.691344	0.571808	0.613421	1	0.908147	0.944565	0.880663	0.821296	1.24851	0.932588	0.707694	-0.100688	0.150155	1.41769	0.0634162	0.503545	1.1978	1.52017	0.0017911	0.604233	2.74688	118	12.8866	5.51611					118
51338683	P62256	UBE2H	Ubiquitin-conjugating enzyme E2 H	414	9	0.769656	0.812819	0.921022	0.863961	0.81992	0.821333	1.25575	1.2447	1.30628	UBE2H	0.589197	0.62224	0.705073	0.661391	0.627676	0.628758	0.961317	0.952861	1	0.834499	0.835071	1.26891	1.00069	0.990916	0.000989766	0.00396319	1.52056	0.000883439	0.604607	3.05382	1.51952	5.35805e-05	0.603618	4.27099	183	20.6421	4.66553	Folding, sorting and degradation	Ubiquitin mediated proteolysis	11		183	Protein modification
417553	Q03393	PTPS	6-pyruvoyl tetrahydrobiopterin synthase	415	1	0.549869	0.635681	0.979311	0.863908	0.817489	0.832395	1.35941	1.17795	1.27472	PTPS	0.40449	0.467615	0.720393	0.635501	0.601355	0.61232	1	0.866516	0.937697	0.72162	0.837931	1.27069	1.16118	0.427737	0.215591	0.368823	1.76089	0.0177483	0.816305	1.75084	1.51647	0.00133157	0.600714	2.87564	145	16.3752	6.68311					145	Cofactor biosynthesis
1718024	P30041	PRDX6	Peroxiredoxin-6	416	152	0.49993	0.581321	0.774582	0.994713	0.807325	0.89727	1.50772	1.26457	1.31254	PRDX6	0.331579	0.385562	0.513743	0.659746	0.53546	0.595116	1	0.838732	0.870548	0.618611	0.899769	1.36161	1.4545	0.0452253	0.540523	1.34462	2.20108	0.00252928	1.13821	2.597	1.51329	0.00737346	0.59769	2.13233	224	25.0192	6.37939	AminoAcid metbolism	Phenylalanine metabolism	1714		224
52788229	P00558	PGK1	Phosphoglycerate kinase 1	417	248	0.619887	0.706968	0.916556	0.938828	0.765868	0.830418	1.30595	1.23221	1.28096	PGK1	0.474662	0.541342	0.701829	0.718883	0.586443	0.63587	1	0.94353	0.980861	0.747804	0.845038	1.27304	1.13003	0.392229	0.176357	0.40646	1.70237	0.00441363	0.767546	2.3552	1.50649	0.00146152	0.59119	2.83519	417	44.5861	8.104	Carbohydrate metabolism	Glycolysis / Gluconeogenesis	19		417	Carbohydrate degradation
300680844	C9JRZ8	AK1BF	Aldo-keto reductase family 1 member B15	418	11	0.601939	0.571815	0.782156	0.996117	0.816349	0.848651	1.3699	1.24601	1.38424	AK1BF	0.434851	0.413089	0.565043	0.719612	0.589744	0.61308	0.989637	0.900142	1	0.65197	0.887039	1.33338	1.36055	0.052045	0.444191	1.28362	2.04516	0.00099244	1.03221	3.0033	1.50319	0.00320581	0.588024	2.49406	344	39.4353	6.46826					316
115612	P04632	CPNS1	Calpain small subunit 1	419	53	0.782656	0.883103	0.972399	0.77497	0.844829	0.776067	1.24325	1.19307	1.16195	CPNS1	0.629527	0.710321	0.782146	0.623344	0.679535	0.624226	1	0.959641	0.934613	0.879386	0.798622	1.19942	0.908158	0.246042	-0.138984	0.608991	1.36393	0.00584442	0.447772	2.23326	1.50187	0.000266395	0.586756	3.57447	268	28.2977	5.19873	Apoptosis	Calpain	1		268
317373261	O76074	PDE5A	cGMP-specific 3',5'-cyclic phosphodiesterase	420	128	0.714536	0.737665	0.814086	0.957046	0.778855	0.849642	1.16836	1.31654	1.39384	PDE5A	0.512637	0.529231	0.584059	0.686624	0.558782	0.609568	0.838227	0.944542	1	0.755429	0.861848	1.29292	1.14087	0.150277	0.190136	0.823106	1.7115	0.00178241	0.775259	2.74899	1.50017	0.00683678	0.585123	2.16515	875	99.9211	6.0874	NucleotideMetabolism	Purine metabolism	1270		875	Purine metabolism
126302580	Q9BXP8	PAPP2	Pappalysin-2	421	1	0.746162	0.926582	1.26383	0.961375	0.764616	0.732541	1.31182	1.17021	1.20078	PAPP2	0.568798	0.706332	0.963418	0.732854	0.582866	0.558415	1	0.892049	0.915351	0.978859	0.819511	1.2276	0.83721	0.395886	-0.256338	0.402429	1.25412	0.189834	0.326672	0.721626	1.49797	0.00810927	0.58301	2.09102	1791	198.411	5.46533					1791
61212142	Q9NT62	ATG3	Ubiquitin-like-conjugating enzyme ATG3	422	6	0.782548	0.969183	1.2185	0.838491	0.687113	0.715154	1.06519	1.1499	1.14051	ATG3	0.642221	0.795388	1	0.688132	0.563899	0.586912	0.874182	0.943696	0.935992	0.990078	0.746919	1.11853	0.754405	0.145064	-0.40659	0.83844	1.12974	0.376038	0.175994	0.424768	1.49753	0.00228357	0.582584	2.64138	314	35.8415	4.7417	cellProcess	Regulation of autophagy (38)	38		314
190461794	A8MYN8	YO024	Putative ankyrin repeat domain-containing protein ENSP00000383090	423	1	0.653043	0.799925	1.01143	0.89339	0.855569	0.873225	1.33925	1.19096	1.39638	YO024	0.467668	0.572855	0.724319	0.639788	0.612704	0.625348	0.959087	0.852889	1	0.821465	0.874061	1.30887	1.06403	0.641467	0.0895355	0.192826	1.59333	0.0156251	0.672045	1.80618	1.49745	0.00220125	0.58251	2.65733	270	29.8971	5.87158
116241363	Q96M96	FGD4	FYVE, RhoGEF and PH domain-containing protein 4	424	7	0.826058	0.799922	0.868966	0.858349	0.829947	0.862083	1.10475	1.32987	1.38242	FGD4	0.597546	0.57864	0.628585	0.620905	0.60036	0.623606	0.799147	0.961992	1	0.831649	0.850126	1.27235	1.02222	0.458375	0.0317032	0.338779	1.52991	0.00730105	0.613447	2.13661	1.49666	0.00791104	0.581744	2.10177	766	86.5714	6.12549					766
205829213	O14950	ML12B	Myosin regulatory light chain 12B	425	197	0.70742	0.855141	0.931262	0.917261	1.01624	0.797812	1.37309	1.44855	1.26227	ML12B	0.488363	0.590342	0.642891	0.633225	0.701558	0.550765	0.947906	1	0.8714	0.831275	0.910439	1.36131	1.09523	0.434049	0.131238	0.362462	1.63761	0.00338646	0.711593	2.47025	1.49522	0.00560881	0.580356	2.25113	172	19.7665	4.84326	Cell motility/Regulation of actin cytoskeleton	Myosin H/L(9)	10		172
6685401	O43731	ERD23	ER lumen protein-retaining receptor 3	427	2	0.821864	1.2084	0.844278	1.28049	1.26469	1.27658	0.723546	0.956905	0.826841	ERD23	0.641836	0.943702	0.659341	1	0.987666	0.996948	0.565055	0.747297	0.645723	0.95818	1.27392	0.835764	1.32952	0.0654584	0.410907	1.18403	0.872241	0.438177	-0.197202	0.35835	0.656056	0.00293324	-0.608109	2.53265	214	25.0103	8.93896					214
74735504	O75204	TM127	Transmembrane protein 127	428	1	1.08842	0.99198	1.00697	1.19777	1.08317	1.09457	0.870519	0.694551	0.648834	TM127	0.908709	0.82819	0.840709	1	0.904321	0.913845	0.726784	0.579871	0.541702	1.02913	1.12517	0.737968	1.09333	0.111505	0.128724	0.952705	0.717082	0.0169777	-0.479789	1.77012	0.655872	0.00726655	-0.608513	2.13867	238	25.8253	6.7124					238
121942206	Q32NB8	PGPS1	CDP-diacylglycerol--glycerol-3-phosphate 3-phosphatidyltransferase, mitochondrial	429	1	0.812568	0.892566	0.665259	1.33923	1.54931	1.34311	0.873338	0.914649	0.98378	PGPS1	0.52447	0.576104	0.42939	0.864402	1	0.866907	0.563694	0.590358	0.634978	0.790131	1.41055	0.923922	1.78521	0.00297052	0.836095	2.52717	1.16933	0.144703	0.22568	0.839522	0.655009	0.00313139	-0.610414	2.50426	556	62.6908	8.89502	lipid metabolism	Glycerophospholipid metabolism	914		556	Phospholipid metabolism
166201912	Q9NYJ1	COA4	Cytochrome c oxidase assembly factor 4 homolog, mitochondrial	430	4	1.04629	0.916093	0.91807	1.20479	1.29142	1.36761	0.700996	0.938338	0.877955	COA4	0.765055	0.669851	0.671297	0.88095	0.944295	1	0.512572	0.686117	0.641965	0.960152	1.28794	0.839096	1.34139	0.00679296	0.423732	2.16794	0.87392	0.219496	-0.194427	0.658573	0.651502	0.00625799	-0.618158	2.20356	87	10.1277	6.03662					87
296434465	Q96ND0	F210A	Protein FAM210A	431	1	0.969381	0.812554	0.717875	1.2301	1.40251	1.42838	0.842798	0.964798	0.830496	F210A	0.678658	0.568865	0.50258	0.861187	0.981891	1	0.590038	0.67545	0.581426	0.83327	1.35366	0.879364	1.62452	0.00565286	0.700013	2.24773	1.05532	0.616208	0.0776766	0.210273	0.649618	0.00328916	-0.622337	2.48291	272	30.7573	9.75928					272
2506816	P13611	CSPG2	Versican core protein	432	2	1.15792	1.12684	1.03747	1.28825	1.33242	1.30288	0.948818	0.823303	0.76789	CSPG2	0.869035	0.84571	0.77864	0.966854	1	0.977832	0.712104	0.617903	0.576314	1.10741	1.30785	0.846671	1.181	0.0064084	0.240007	2.19325	0.764551	0.015619	-0.387315	1.80635	0.647377	0.0011124	-0.627322	2.95374	3396	372.59	4.51318	ECM	Proteoglycans(29)	29		3396
127116	P21741	MK	Midkine	434	4	1.18199	1.0285	0.92775	1.18834	1.26214	1.22093	0.699276	0.83202	0.82865	MK	0.936495	0.814882	0.735059	0.941522	1	0.967344	0.554039	0.659212	0.656542	1.04608	1.2238	0.786649	1.16989	0.082045	0.226377	1.08595	0.751997	0.0391138	-0.411201	1.40767	0.642791	0.000848081	-0.637578	3.07156	143	15.575	9.78857					143
74715889	Q8TDB4	HUMMR	Protein MGARP	435	5	0.838027	0.643866	0.494558	1.26402	1.32651	1.52856	0.747162	0.908925	0.969854	HUMMR	0.548248	0.421225	0.323546	0.826939	0.867821	1	0.488802	0.59463	0.63449	0.658817	1.37303	0.875314	2.08409	0.0049884	1.05941	2.30204	1.32861	0.144494	0.409923	0.84015	0.637505	0.00869849	-0.649492	2.06056	240	25.3742	4.43701					240
117949389	Q6YHK3	CD109	CD109 antigen	436	15	1.68631	1.36789	0.734883	1.06022	1.02621	0.972192	0.698939	0.606537	0.63551	CD109	1	0.811176	0.435794	0.628722	0.608554	0.57652	0.414478	0.359683	0.376864	1.26303	1.01954	0.646995	0.807219	0.434773	-0.308969	0.361738	0.512257	0.093405	-0.965061	1.02963	0.634595	0.000572584	-0.656092	3.24216	1445	161.587	5.84619	TGF	TGF-Binding	1		1445
2501242	Q13472	TOP3A	DNA topoisomerase 3-alpha	437	1	1.45909	1.41492	1.52865	0.998163	1.06579	0.981744	0.604088	0.762043	0.565278	TOP3A	0.954492	0.925599	1	0.652969	0.697211	0.642228	0.395177	0.498506	0.369788	1.46755	1.01523	0.643803	0.691787	0.000418451	-0.531601	3.37836	0.438691	0.000276921	-1.18872	3.55764	0.634142	0.00475399	-0.657121	2.32294	1001	112.3	8.33838	DNA replication and Repair	Homologous recombination	22		1001
12643875	Q9UBV4	WNT16	Protein Wnt-16	438	2	0.831977	0.936194	0.709823	1.38176	1.34666	1.36705	0.810436	0.902947	0.873966	WNT16	0.602114	0.677538	0.51371	1	0.974595	0.989355	0.586525	0.653476	0.632503	0.825998	1.36516	0.86245	1.65273	0.00123698	0.724855	2.90764	1.04413	0.63422	0.0623025	0.19776	0.63176	6.63721e-05	-0.662552	4.17801	365	40.6628	8.60205	Wnt	Ligand	19		365
130316	P00747	PLMN	Plasminogen	439	1	0.79908	0.677519	0.604476	1.4477	1.6131	1.34185	0.90976	0.853682	0.955742	PLMN	0.495369	0.42001	0.374729	0.897465	1	0.831843	0.563982	0.529218	0.592487	0.693691	1.46755	0.906394	2.11556	0.00134936	1.08104	2.86987	1.30662	0.0292403	0.385845	1.53402	0.617624	0.00264135	-0.695198	2.57817	810	90.5102	7.23975	ECM	enzyme	33		810
1709662	P55058	PLTP	Phospholipid transfer protein	440	2	1.05588	0.753634	0.65463	1.13242	1.43051	1.38309	0.817607	0.771478	0.830838	PLTP	0.738115	0.526829	0.45762	0.791617	1	0.966852	0.57155	0.539303	0.580799	0.821381	1.31534	0.806641	1.60137	0.031411	0.679311	1.50292	0.982055	0.909671	-0.026125	0.0411155	0.613257	0.0056946	-0.705436	2.24454	493	54.7045	7.00537					493
135850	P01033	TIMP1	Metalloproteinase inhibitor 1	441	8	0.957906	0.819731	0.699275	1.30572	1.47108	1.35811	0.792559	0.890763	0.838539	TIMP1	0.651157	0.557229	0.475347	0.887593	1	0.923204	0.538759	0.605515	0.570015	0.825637	1.37831	0.840621	1.66938	0.00345582	0.739316	2.46145	1.01815	0.860417	0.0259464	0.0652909	0.609894	0.000677822	-0.713369	3.16888	207	23.1555	8.104	ECM	mmp inhibitor	3		207
187471103	A6NDB9	PALM3	Paralemmin-3	442	1	1.11937	0.845096	0.946593	1.588	1.94336	1.55126	1.14104	0.953548	0.960888	PALM3	0.575997	0.434864	0.487091	0.81714	1	0.798238	0.587147	0.49067	0.494447	0.970353	1.69421	1.01849	1.74597	0.00818654	0.804028	2.0869	1.04961	0.658012	0.069852	0.181766	0.601161	0.0083242	-0.734176	2.07966	673	71.6522	4.52588					673
215274118	P13164	IFM1	Interferon-induced transmembrane protein 1	443	5	1.1372	0.601174	0.669426	1.26985	1.21242	1.44875	0.638221	0.89223	0.806556	IFM1	0.784947	0.41496	0.46207	0.876509	0.836869	1	0.440531	0.61586	0.556724	0.802599	1.31034	0.779002	1.63262	0.0499965	0.70719	1.30106	0.9706	0.904271	-0.0430509	0.0437016	0.594504	0.00672923	-0.750241	2.17203	125	13.9553	7.92822					125		INTRAMEM
308153588	Q8N4N8	KIF2B	Kinesin-like protein KIF2B	444	8	2.09684	0.953351	1.16263	1.01778	1.04872	0.959079	0.749364	0.554761	0.490223	KIF2B	1	0.45466	0.554465	0.485387	0.50014	0.457392	0.357377	0.26457	0.233791	1.40427	1.00852	0.598116	0.718183	0.324395	-0.477577	0.488926	0.425926	0.0887128	-1.23133	1.05201	0.59306	0.00752905	-0.753749	2.12326	673	76.2056	8.646					673
308153653	P12259	FA5	Coagulation factor V	445	6	1.00229	1.2611	0.906223	1.25872	1.34215	1.22438	0.919903	0.677709	0.661481	FA5	0.746781	0.939609	0.675201	0.937839	1	0.912252	0.685394	0.504942	0.492851	1.05654	1.27509	0.753031	1.20685	0.121776	0.271249	0.91444	0.712734	0.087753	-0.488565	1.05674	0.590573	0.00449853	-0.759813	2.34693	2224	251.546	6.04932					2224
1706175	P52823	STC1	Stanniocalcin-1	446	2	0.674266	0.605232	0.874753	1.598	1.23278	1.4017	0.719275	0.918019	0.854713	STC1	0.421944	0.378744	0.547406	1	0.771455	0.877164	0.45011	0.574481	0.534865	0.718084	1.41083	0.830669	1.96471	0.00646499	0.974319	2.18943	1.15679	0.32256	0.210121	0.49139	0.588781	0.00861011	-0.764197	2.06499	247	27.6038	7.98682					247
313104191	Q15043	S39AE	Zinc transporter ZIP14	448	5	1.30295	1.15085	0.929893	1.22098	1.30251	1.29761	0.738388	0.715144	0.699045	S39AE	1	0.88326	0.713682	0.937088	0.999662	0.995903	0.566704	0.548865	0.536509	1.1279	1.2737	0.717526	1.12927	0.260983	0.175392	0.583388	0.636163	0.0196343	-0.652532	1.70699	0.563339	4.21608e-05	-0.827924	4.37509	492	54.1772	5.32568					492
313104195	Q99988	GDF15	Growth/differentiation factor 15	450	1	0.603676	0.549593	0.600861	1.59706	1.64443	1.66303	0.768636	0.81167	0.971235	GDF15	0.362997	0.330476	0.361304	0.960329	0.988811	1	0.462189	0.488066	0.584014	0.58471	1.63484	0.850514	2.79598	2.3708e-06	1.48336	5.62511	1.45459	0.0142861	0.540614	1.84509	0.520243	0.000265334	-0.942742	3.57621	308	34.1188	9.65674					308
74735245	Q9Y2Y0	AR2BP	ADP-ribosylation factor-like protein 2-binding protein	451	1	0.912165	1.02131	1.40992	0.785607	0.697289	0.740929	1.14196	1.06167	1.11987	AR2BP	0.64696	0.72437	1	0.557198	0.494558	0.52551	0.809946	0.752997	0.794279	1.11447	0.741275	1.10784	0.665139	0.0715045	-0.588271	1.14567	0.99405	0.967496	-0.00860919	0.0143507	1.4945	0.000468687	0.579662	3.32912	163	18.8101	4.34814					163
34924986	Q96AT9	RPE	Ribulose-phosphate 3-epimerase	452	5	0.863456	0.899156	1.01298	0.838845	0.765761	0.84141	1.19602	1.18661	1.26863	RPE	0.680619	0.708759	0.798481	0.66122	0.603611	0.663241	0.942764	0.935348	1	0.925197	0.815339	1.21709	0.88126	0.0996451	-0.182361	1.00154	1.31549	0.00495007	0.395603	2.30539	1.49274	0.0003618	0.577964	3.44153	228	24.9113	5.57959	Carbohydrate metabolism	Pentose phosphate pathway	36		228
74715258	Q8ND04	SMG8	Protein SMG8	453	1	1.05563	1.11858	1.45569	0.77304	0.638737	0.692615	1.04108	1.04434	1.05555	SMG8	0.725178	0.768424	1	0.531049	0.438788	0.4758	0.715179	0.717423	0.725119	1.20997	0.701464	1.04699	0.579738	0.0174514	-0.786527	1.75817	0.865303	0.259916	-0.208722	0.585167	1.49258	0.000920123	0.577804	3.03615	991	109.614	7.6792					991
136479	P13693	TCTP	Translationally-controlled tumor protein	454	50	0.772364	0.903041	1.13456	0.840851	0.786404	0.785037	1.07112	1.27004	1.25694	TCTP	0.608141	0.711034	0.893322	0.662066	0.619196	0.61812	0.843378	1	0.989683	0.936653	0.804097	1.19937	0.858479	0.284985	-0.220145	0.545177	1.28048	0.101213	0.356687	0.994764	1.49157	0.00408766	0.576832	2.38853	172	19.5826	4.93213					172
729856	P41236	IPP2	Protein phosphatase inhibitor 2	455	4	0.90199	0.794484	1.24461	0.930573	0.739174	0.83933	1.26749	1.14993	1.32497	IPP2	0.68076	0.599622	0.939345	0.702333	0.557878	0.633469	0.956612	0.867892	1	0.980361	0.836359	1.24747	0.853113	0.38141	-0.229191	0.418608	1.27246	0.139601	0.347615	0.855113	1.49154	0.00553862	0.576806	2.2566	205	23.0009	4.7417					205
266344	P30740	ILEU	Leukocyte elastase inhibitor	456	21	0.66443	0.6711	0.76611	0.944349	0.819147	0.870419	1.39781	1.2539	1.27574	ILEU	0.475338	0.480109	0.54808	0.675593	0.586023	0.622703	1	0.897049	0.912675	0.700547	0.877972	1.30915	1.25327	0.0223074	0.325693	1.65155	1.86876	0.000393603	0.902078	3.40494	1.49111	0.00171038	0.576385	2.76691	379	42.7147	6.27783					379
74718025	Q9H0W9	CK054	Ester hydrolase C11orf54	457	1	0.703759	0.609025	0.738255	1.09229	0.864406	0.866007	1.44734	1.32813	1.42236	CK054	0.486245	0.420791	0.510079	0.754688	0.597239	0.598346	1	0.917635	0.982745	0.68368	0.9409	1.39927	1.37623	0.0389059	0.46072	1.40999	2.04668	0.000174248	1.03329	3.75883	1.48717	0.00546933	0.572566	2.26207	315	35.0946	6.69775					315
1708543	P49773	HINT1	Histidine triad nucleotide-binding protein 1	458	24	0.699214	0.803151	1.0676	0.893281	0.806158	0.833828	1.30264	1.24236	1.22164	HINT1	0.536766	0.616556	0.819566	0.685746	0.618864	0.640105	1	0.953722	0.937816	0.856655	0.844422	1.25555	0.98572	0.918741	-0.0207498	0.0368069	1.46564	0.0237667	0.551529	1.62403	1.48687	0.000313001	0.572278	3.50445	126	13.7931	6.94678					126
677286751	Q8IVT5	KSR1	Kinase suppressor of Ras 1	459	2	1.01878	1.009	0.896393	0.88616	0.717523	0.774399	1.11247	1.21924	1.20147	KSR1	0.83559	0.827564	0.735209	0.726816	0.588502	0.635151	0.91243	1	0.985429	0.974724	0.792694	1.17773	0.81325	0.0450232	-0.298229	1.34656	1.20827	0.0167295	0.272938	1.77652	1.48573	0.00294467	0.571167	2.53096	923	102.096	8.66064					923
73621223	Q9HBD1	RC3H2	Roquin-2	460	1	1.0568	1.3389	1.54866	0.830427	0.867052	0.873191	1.2828	1.30742	1.21827	RC3H2	0.682399	0.864553	1	0.536224	0.559873	0.563838	0.82833	0.844226	0.786664	1.31479	0.85689	1.2695	0.651734	0.032921	-0.617645	1.48253	0.965554	0.77032	-0.050571	0.113329	1.48152	0.000156557	0.567074	3.80533	1191	131.586	6.88818	Ubiquitination	E3	5568		1191	Protein modification
2507560	P07311	ACYP1	Acylphosphatase-1	461	2	0.624712	0.734888	1.03573	0.820014	0.841639	0.780466	1.33952	1.15199	1.12611	ACYP1	0.466369	0.548619	0.773212	0.612169	0.628312	0.582645	1	0.859999	0.840683	0.798445	0.81404	1.20588	1.01953	0.906087	0.0279061	0.0428302	1.51028	0.0436993	0.594816	1.35953	1.48135	0.00489307	0.566909	2.31042	99	11.2539	9.30518	Carbohydrate metabolism	Pyruvate metabolism	265		99
1170955	P14174	MIF	Macrophage migration inhibitory factor	462	14	0.690932	0.746042	1.02713	0.917805	0.782211	0.833618	1.25101	1.24619	1.25408	MIF	0.550946	0.59489	0.819026	0.731853	0.623731	0.664723	0.997546	0.993703	1	0.821367	0.844545	1.25043	1.02822	0.845283	0.0401467	0.0729978	1.52237	0.0146066	0.606321	1.83545	1.48059	0.000510264	0.566174	3.2922	115	12.4682	7.88428	AminoAcid metbolism	Tyrosine metabolism	1696		115
14423909	O94768	ST17B	Serine/threonine-protein kinase 17B	463	1	0.87429	0.952316	1.14297	0.682936	0.765949	0.753523	1.01363	1.06287	1.18338	ST17B	0.738806	0.80474	0.965851	0.577105	0.647254	0.636753	0.856552	0.898162	1	0.989859	0.734136	1.08663	0.741657	0.038082	-0.431176	1.41928	1.09776	0.36325	0.134562	0.439795	1.48014	0.0033995	0.565738	2.46858	372	42.3172	5.24951					372
37082118	Q96AB6	NTAN1	Protein N-terminal asparagine amidohydrolase	464	3	0.684531	0.898971	1.05314	0.982804	0.757561	0.866211	1.38142	1.28885	1.17505	NTAN1	0.495526	0.650757	0.762356	0.711443	0.548392	0.627042	1	0.932984	0.850612	0.878879	0.868859	1.28177	0.988599	0.940011	-0.0165433	0.026867	1.45842	0.0301792	0.544406	1.52029	1.47524	0.00946171	0.560949	2.02403	310	34.6556	6.26514					310
74753033	Q9NWV4	CA123	UPF0587 protein C1orf123	465	8	0.647969	0.801541	1.11847	0.852425	0.824381	0.777015	1.23478	1.21672	1.16827	CA123	0.524765	0.649137	0.905806	0.690346	0.667634	0.629275	1	0.985373	0.946136	0.855993	0.81794	1.20659	0.955545	0.799585	-0.0656039	0.0971352	1.40958	0.0663877	0.495263	1.17791	1.47515	0.00019534	0.560866	3.70921	160	18.0368	5.0083					160
215274106	Q12965	MYO1E	Unconventional myosin-Ie	466	10	0.843943	1.08942	1.08865	0.876505	0.773484	0.766505	1.0687	1.22592	1.26681	MYO1E	0.666195	0.859971	0.859361	0.691898	0.610575	0.605066	0.843617	0.967721	1	1.00734	0.805498	1.18715	0.799631	0.0861752	-0.322594	1.06462	1.1785	0.151457	0.236949	0.81971	1.4738	0.0055211	0.559543	2.25797	1108	126.982	8.92432					1108
12643390	O00299	CLIC1	Chloride intracellular channel protein 1	467	102	0.748832	0.856272	1.15307	0.836223	0.802424	0.783757	1.14921	1.18536	1.23476	CLIC1	0.606462	0.693475	0.933845	0.677238	0.649865	0.634747	0.93072	0.959995	1	0.919391	0.807468	1.18978	0.878264	0.410341	-0.187274	0.386855	1.29409	0.0935795	0.371938	1.02882	1.47346	0.000195493	0.559212	3.70887	241	26.9057	5.17334					241
17380385	P06744	G6PI	Glucose-6-phosphate isomerase	468	75	0.718	0.790127	1.03385	0.878293	0.807545	0.812732	1.33846	1.20865	1.12242	G6PI	0.536437	0.590325	0.772419	0.656196	0.603339	0.607214	1	0.903013	0.838593	0.847327	0.832857	1.22318	0.982923	0.890022	-0.0248497	0.0505995	1.44357	0.030297	0.529643	1.5186	1.46865	0.00427448	0.554493	2.36912	558	63.1072	8.32373	Carbohydrate metabolism	Glycolysis / Gluconeogenesis	6		558	Carbohydrate degradation
113600	P14550	AK1A1	Alcohol dehydrogenase [NADP(+)]	469	35	0.646117	0.733176	0.853753	0.918212	0.849873	0.865378	1.37715	1.20096	1.28108	AK1A1	0.469169	0.532386	0.619941	0.666747	0.617124	0.628382	1	0.872062	0.930235	0.744349	0.877821	1.2864	1.17931	0.104024	0.237948	0.982867	1.72822	0.00234627	0.789285	2.62962	1.46544	0.00174959	0.551336	2.75706	325	36.5499	6.78564	Carbohydrate metabolism	Glycolysis / Gluconeogenesis	45		325
1352332	P43005	EAA3	Excitatory amino acid transporter 3	470	1	0.956213	1.0164	1.0241	0.768083	0.863276	0.767363	1.24188	1.16436	1.10891	EAA3	0.769975	0.818436	0.824642	0.618487	0.695139	0.617906	1	0.937583	0.89293	0.998904	0.799574	1.17171	0.800451	0.00656132	-0.321115	2.18301	1.173	0.0173067	0.230204	1.76179	1.46542	0.0017423	0.551318	2.75888	524	57.0633	5.70654	Digestive_metabolism	Protein digestion and absorption	2221		524
110287974	Q8TF42	UBS3B	Ubiquitin-associated and SH3 domain-containing protein B	471	5	0.887387	1.03706	1.29263	0.753505	0.7933	0.738712	1.15157	1.07157	1.12403	UBS3B	0.686496	0.802282	1	0.582923	0.613709	0.571479	0.890871	0.828986	0.869568	1.07236	0.761839	1.11572	0.710433	0.0600415	-0.49323	1.22155	1.04044	0.737362	0.0571938	0.132319	1.46452	0.000244135	0.550423	3.61237	649	72.6494	6.93213					649
313104206	Q8WX93	PALLD	Palladin	472	146	0.710159	0.707411	0.733296	0.911742	0.848777	0.886922	1.26386	1.25091	1.36045	PALLD	0.522004	0.519984	0.539011	0.670178	0.623895	0.651934	0.929005	0.919482	1	0.716955	0.88248	1.29174	1.23087	0.00117833	0.299681	2.92873	1.8017	8.53078e-05	0.84936	4.06901	1.46376	0.000471283	0.549679	3.32672	1383	150.47	7.09326					1383
317373494	P38935	SMBP2	DNA-binding protein SMUBP-2	473	1	0.704742	1.15566	1.05905	0.72536	0.569415	0.689744	0.981253	0.997904	0.920958	SMBP2	0.60982	1	0.916409	0.627662	0.492721	0.596842	0.849088	0.863497	0.796915	0.97315	0.661506	0.966705	0.679758	0.0980023	-0.556907	1.00876	0.993377	0.965253	-0.00958637	0.0153588	1.46137	0.00440419	0.547321	2.35613	993	109.082	8.96826					993
548453	Q06830	PRDX1	Peroxiredoxin-1	474	331	0.696915	0.745023	0.924179	0.938503	0.804795	0.853874	1.2761	1.23796	1.27916	PRDX1	0.544821	0.58243	0.722487	0.733685	0.629157	0.667525	0.997608	0.967792	1	0.788706	0.865724	1.26441	1.09765	0.387031	0.13442	0.412254	1.60315	0.00250206	0.680907	2.6017	1.46052	0.000640393	0.546486	3.19355	199	22.0963	8.1333	cellProcess	Peroxisome	76		199
6016173	P78417	GSTO1	Glutathione S-transferase omega-1	475	34	0.63646	0.734654	1.00944	0.938421	0.799418	0.872333	1.17966	1.30405	1.32762	GSTO1	0.4794	0.553362	0.760338	0.706846	0.602145	0.657066	0.888553	0.982245	1	0.793518	0.870058	1.27044	1.09646	0.553905	0.132849	0.256564	1.60102	0.016794	0.678995	1.77485	1.46018	0.00278322	0.546147	2.55545	241	27.548	6.59521	AminoAcid metbolism	Glutathione metabolism	1788		241
24638222	Q9H299	SH3L3	SH3 domain-binding glutamic acid-rich-like protein 3	476	52	0.645395	0.745203	1.11339	0.950645	0.758553	0.815737	1.21743	1.17827	1.28691	SH3L3	0.501508	0.579064	0.865169	0.738704	0.589438	0.633873	0.946014	0.915584	1	0.834664	0.841645	1.22754	1.00836	0.965859	0.0120157	0.0150864	1.4707	0.0544115	0.556501	1.26431	1.4585	0.0040828	0.544486	2.38904	93	10.4313	4.93213					93
12644008	P30085	KCY	UMP-CMP kinase	477	29	0.622372	0.74612	0.943398	0.932376	0.804048	0.85491	1.37654	1.13501	1.2634	KCY	0.452127	0.542024	0.685338	0.677332	0.584107	0.621056	1	0.824534	0.917807	0.77063	0.863778	1.25832	1.12087	0.407101	0.164623	0.390298	1.63284	0.0139082	0.707385	1.85673	1.45676	0.00756218	0.542763	2.12135	196	22.2083	5.56689	NucleotideMetabolism	Pyrimidine metabolism	1318		196
74733528	Q9H0R4	HDHD2	Haloacid dehalogenase-like hydrolase domain-containing protein 2	478	4	0.754526	0.754899	0.875946	0.936434	0.825562	0.843404	1.42037	1.19744	1.17149	HDHD2	0.531216	0.531479	0.616701	0.659286	0.581228	0.59379	1	0.843042	0.824772	0.795124	0.868467	1.2631	1.09224	0.239001	0.127291	0.6216	1.58856	0.00619493	0.667716	2.20796	1.4544	0.0101769	0.540425	1.99238	259	28.5179	6.23975					259
30923294	Q12765	SCRN1	Secernin-1	479	51	0.63524	0.681615	0.90968	0.911166	0.774808	0.880413	1.27427	1.21939	1.23223	SCRN1	0.498514	0.534908	0.713885	0.715052	0.608042	0.690917	1	0.956936	0.967012	0.742178	0.855462	1.24196	1.15264	0.296035	0.204939	0.528657	1.6734	0.00444089	0.742785	2.35253	1.4518	0.00096678	0.537846	3.01467	414	46.3525	4.75439					414
74734348	Q9NUJ3	T11L1	T-complex protein 11-like protein 1	480	3	0.755543	0.886354	1.1093	0.953905	0.793981	0.861683	1.23868	1.2876	1.25728	T11L1	0.586783	0.688376	0.861521	0.740839	0.616636	0.669215	0.962003	1	0.976454	0.917064	0.869857	1.26119	0.948523	0.698045	-0.0762453	0.156117	1.37525	0.0299046	0.459689	1.52426	1.44988	0.00128052	0.535934	2.89261	509	56.9987	5.59229					509
8247940	Q15181	IPYR	Inorganic pyrophosphatase	481	43	0.716702	0.78611	0.963952	0.890964	0.796954	0.839307	1.19651	1.24262	1.21827	IPYR	0.576766	0.632622	0.77574	0.717003	0.641348	0.675432	0.962893	1	0.9804	0.822255	0.842408	1.21913	1.02451	0.810017	0.0349336	0.0915058	1.48267	0.00606952	0.568199	2.21685	1.4472	0.000239676	0.533265	3.62038	289	32.6392	5.85889	Energy metabolism	Oxidative phosphorylation	563		289
46577124	Q9H3K6	BOLA2	BolA-like protein 2	482	4	0.614199	0.773179	1.21838	0.909691	0.782625	0.830308	1.20787	1.2136	1.22192	BOLA2	0.502652	0.632759	0.997102	0.744478	0.640489	0.679512	0.988507	0.993196	1	0.868585	0.840874	1.21446	0.968097	0.887928	-0.0467763	0.0516223	1.39821	0.128392	0.483582	0.891461	1.44429	0.000557586	0.530358	3.25369	86	10.1102	6.52197					86
20137480	Q9H4A4	AMPB	Aminopeptidase B	483	42	0.75292	0.821594	0.911269	0.895623	0.858563	0.861908	1.39917	1.18389	1.19388	AMPB	0.538119	0.587201	0.651293	0.64011	0.613623	0.616013	1	0.846136	0.85328	0.828594	0.872031	1.25898	1.05242	0.410846	0.0737137	0.386321	1.51942	0.00681228	0.603518	2.16671	1.44373	0.00554719	0.529805	2.25593	650	72.5495	5.74463	Epithelial-mesenchymal transition (EMT)	Epithelial Cell Surface and Extracellular Molecules	3944		650
56404943	Q99497	PARK7	Protein DJ-1	484	88	0.683906	0.776472	0.991814	0.966783	0.792611	0.850056	1.21948	1.25465	1.28493	PARK7	0.532249	0.604289	0.771879	0.752399	0.616849	0.661556	0.949058	0.976434	1	0.817397	0.869817	1.25302	1.06413	0.64265	0.0896743	0.192026	1.53294	0.00947191	0.616303	2.02356	1.44056	0.00217364	0.526629	2.66281	189	19.8785	6.78564					189
317373596	P17655	CAN2	Calpain-2 catalytic subunit	485	125	0.781102	0.842024	1.02522	0.916578	0.7964	0.821762	1.19607	1.21998	1.2229	CAN2	0.638729	0.688546	0.838354	0.749511	0.651238	0.671977	0.978056	0.997613	1	0.882783	0.844914	1.21298	0.957102	0.668097	-0.0632557	0.175161	1.37404	0.0110644	0.458428	1.95607	1.43563	0.000607038	0.521684	3.21678	700	79.9448	4.98291	Apoptosis	Calpain	3		700
20981679	P52209	6PGD	6-phosphogluconate dehydrogenase, decarboxylating	486	110	0.782549	0.851518	1.01143	0.918997	0.822254	0.816463	1.30497	1.17233	1.19263	6PGD	0.599667	0.652517	0.775054	0.704227	0.630093	0.625655	1	0.898358	0.913914	0.881831	0.852572	1.22331	0.96682	0.718112	-0.0486808	0.143808	1.38724	0.012611	0.472221	1.89925	1.43485	0.0021954	0.520902	2.65849	483	53.106	7.2251	Carbohydrate metabolism	Pentose phosphate pathway	35		483	Carbohydrate degradation
2493285	P55957	BID	BH3-interacting domain death agonist	487	9	0.572582	0.760887	0.995335	0.953482	0.848126	0.914674	1.28899	1.27975	1.32098	BID	0.433453	0.576004	0.753485	0.721802	0.642045	0.692423	0.975786	0.968789	1	0.776268	0.905427	1.29657	1.16638	0.363581	0.222044	0.439399	1.67026	0.0133384	0.740074	1.8749	1.432	0.000297101	0.51803	3.5271	195	21.981	5.43994	Apoptosis	Pro-apoptosis	13		195
74752914	Q9NR12	PDLI7	PDZ and LIM domain protein 7	488	103	0.834867	0.880217	0.970077	0.882014	0.827387	0.835109	1.32094	1.12742	1.19508	PDLI7	0.632025	0.666357	0.734384	0.667717	0.626362	0.632209	1	0.853497	0.904724	0.895053	0.84817	1.21448	0.947619	0.339244	-0.0776206	0.469488	1.35688	0.00992802	0.440294	2.00314	1.43188	0.00347002	0.517914	2.45967	457	49.8126	8.41162					457
1718079	P50552	VASP	Vasodilator-stimulated phosphoprotein	489	54	0.850401	0.929933	1.12936	0.842017	0.74319	0.759502	1.04677	1.14252	1.16778	VASP	0.728217	0.796322	0.967099	0.721038	0.63641	0.650378	0.896373	0.978369	1	0.969899	0.78157	1.11903	0.805826	0.100243	-0.311461	0.998946	1.15376	0.175818	0.206337	0.754936	1.43177	0.00213941	0.517798	2.66971	380	39.8051	8.93896	Cellular Communication	Focal adhesion	133		380
54039805	P68036	UB2L3	Ubiquitin-conjugating enzyme E2 L3	490	43	0.708189	0.851287	1.24241	0.866019	0.772326	0.763242	1.12573	1.15089	1.15805	UB2L3	0.570011	0.685188	1	0.697046	0.621634	0.614323	0.906083	0.926337	0.932099	0.933963	0.800529	1.14489	0.857132	0.458987	-0.222412	0.3382	1.22584	0.257728	0.293773	0.588838	1.43017	0.000552247	0.516185	3.25787	154	17.8502	8.51416	Folding, sorting and degradation	Ubiquitin mediated proteolysis	12		154	Protein modification
17374910	O95834	EMAL2	Echinoderm microtubule-associated protein-like 2	491	18	0.656644	0.787137	0.866814	0.942475	0.892959	0.925718	1.27324	1.30545	1.36321	EMAL2	0.481691	0.577416	0.635864	0.691366	0.655043	0.679074	0.934006	0.957632	1	0.770198	0.920384	1.31397	1.195	0.0755467	0.257006	1.12178	1.70601	0.00123018	0.770626	2.91003	1.42763	0.00019663	0.51362	3.70635	649	70.6341	6.31592					649
51702264	P62942	FKB1A	Peptidyl-prolyl cis-trans isomerase FKBP1A	492	24	0.657207	0.73757	0.958652	0.921514	0.859281	0.87302	1.30969	1.18186	1.29156	FKB1A	0.501803	0.563163	0.731968	0.703611	0.656094	0.666585	1	0.902397	0.986156	0.784477	0.884605	1.26104	1.12764	0.337994	0.173304	0.471091	1.60749	0.00843374	0.68481	2.07398	1.42554	0.00103999	0.511506	2.98297	108	11.9431	8.1626	TGF	TGF-Binding	3		108
6831691	O75347	TBCA	Tubulin-specific chaperone A	493	42	0.715594	0.85968	1.19564	0.879114	0.792352	0.836869	1.14313	1.19108	1.241	TBCA	0.576625	0.692729	0.963442	0.708389	0.638476	0.674348	0.921132	0.95977	1	0.923637	0.836112	1.19174	0.905239	0.577162	-0.143629	0.238702	1.29027	0.13815	0.367669	0.85965	1.42533	0.00070855	0.511299	3.14963	108	12.8467	5.2876					108
121116	P06396	GELS	Gelsolin	494	251	0.597468	0.608718	0.728382	0.994622	0.895674	0.935666	1.38706	1.2703	1.36274	GELS	0.430744	0.438854	0.525126	0.717071	0.645734	0.674566	1	0.915821	0.982467	0.644856	0.941987	1.34004	1.46077	0.00426161	0.54673	2.37043	2.07804	0.000224809	1.05522	3.64819	1.42256	0.000958947	0.508492	3.01821	782	85.6442	6.27783	Cell motility/Regulation of actin cytoskeleton	Stabilizer(12)	2		782
317373524	O60664	PLIN3	Perilipin-3	495	168	0.732394	0.835305	1.00827	0.945859	0.787925	0.835269	1.2893	1.15424	1.19825	PLIN3	0.568056	0.647875	0.782026	0.733622	0.611126	0.647847	1	0.895248	0.929378	0.858655	0.856351	1.21393	0.997317	0.981442	-0.0038763	0.00813518	1.41376	0.0167154	0.499535	1.77688	1.41756	0.00433231	0.503411	2.36328	434	47.0459	5.43994					434
130348	P18669	PGAM1	Phosphoglycerate mutase 1	496	118	0.680238	0.777985	0.998238	0.952947	0.788826	0.856072	1.2767	1.18608	1.21977	PGAM1	0.532808	0.60937	0.781887	0.746412	0.617861	0.670533	1	0.929018	0.955403	0.818821	0.865948	1.22752	1.05756	0.677974	0.0807332	0.168787	1.49913	0.0138777	0.584124	1.85768	1.41754	0.00267546	0.503391	2.5726	254	28.7858	7.18115	Carbohydrate metabolism	Glycolysis / Gluconeogenesis	20		254
113408	P11766	ADHX	Alcohol dehydrogenase class-3	497	61	0.730407	0.755556	0.968794	0.924248	0.807651	0.854821	1.20677	1.18895	1.27022	ADHX	0.575027	0.594825	0.7627	0.727631	0.635838	0.672974	0.950056	0.936022	1	0.818252	0.86224	1.22198	1.05376	0.6236	0.0755436	0.205094	1.4934	0.00710145	0.578603	2.14865	1.41722	0.00101012	0.503059	2.99563	374	39.6984	7.48877	Carbohydrate metabolism	Glycolysis / Gluconeogenesis	43		374
51702775	P62937	PPIA	Peptidyl-prolyl cis-trans isomerase A	498	326	0.704491	0.786596	1.02358	0.919088	0.800887	0.849577	1.25501	1.17089	1.21435	PPIA	0.561343	0.626764	0.815598	0.732335	0.638151	0.676949	1	0.932975	0.967603	0.838223	0.856517	1.21342	1.02182	0.865893	0.0311478	0.0625358	1.44761	0.0190797	0.53367	1.71943	1.41669	0.0010542	0.502523	2.97708	165	18.0009	7.81104					165
74713511	Q7Z4H3	HDDC2	HD domain-containing protein 2	499	2	0.821828	0.895777	1.18123	0.880658	0.757698	0.776771	1.12717	1.12754	1.16005	HDDC2	0.695736	0.75834	1	0.74554	0.641446	0.657592	0.954232	0.954546	0.98207	0.96628	0.805042	1.13826	0.833136	0.237048	-0.263376	0.625164	1.17798	0.193374	0.236313	0.713602	1.41391	0.00110584	0.499689	2.95631	204	23.3757	5.49072					204
269849688	Q08623	HDHD1	Pseudouridine-5'-monophosphatase	500	6	0.700292	0.784291	1.01818	0.889093	0.78298	0.867256	1.23681	1.2148	1.1355	HDHD1	0.566207	0.634123	0.823225	0.718859	0.633063	0.701202	1	0.982201	0.918086	0.834253	0.846443	1.1957	1.01461	0.909267	0.0209283	0.0413086	1.43326	0.0224353	0.519303	1.64907	1.41262	0.00144125	0.498375	2.84126	228	25.2329	5.31299					228
41017274	O75608	LYPA1	Acyl-protein thioesterase 1	501	8	0.792596	0.846146	1.10726	0.80416	0.85591	0.85882	1.11656	1.20175	1.23752	LYPA1	0.640473	0.683746	0.894741	0.649817	0.691635	0.693987	0.902262	0.971096	1	0.915333	0.83963	1.18528	0.917295	0.486291	-0.124543	0.313104	1.29491	0.0597063	0.372854	1.22398	1.41166	0.000988999	0.497397	3.0048	230	24.6535	6.771	lipid metabolism	Glycerophospholipid metabolism	891		230
317373435	O15037	KHNYN	Protein KHNYN	502	1	0.901523	0.906647	1.16055	0.801446	0.776794	0.786484	1.03093	1.10839	1.19378	KHNYN	0.755187	0.759479	0.972172	0.671354	0.650704	0.658821	0.863591	0.928475	1	0.989575	0.788241	1.11103	0.796545	0.0788181	-0.328172	1.10337	1.12274	0.281194	0.167021	0.550995	1.40951	0.00246264	0.495193	2.6086	678	74.4874	7.02002					678
121957949	O15090	ZN536	Zinc finger protein 536	503	2	0.969312	1.18508	1.57169	0.736535	0.598269	0.640145	0.866993	0.952494	0.963032	ZN536	0.616733	0.754017	1	0.468626	0.380654	0.407298	0.551632	0.606032	0.612737	1.24203	0.658316	0.927506	0.530034	0.0320753	-0.915844	1.49383	0.746768	0.153405	-0.421267	0.814161	1.40891	0.00617492	0.494576	2.20937	1300	141.328	7.26904					1300
74751663	Q93052	LPP	Lipoma-preferred partner	504	44	0.822272	0.911383	1.04379	0.897008	0.811576	0.829765	1.22198	1.13194	1.21765	LPP	0.6729	0.745824	0.85418	0.73406	0.664148	0.679033	1	0.926314	0.996455	0.925816	0.846117	1.19052	0.913915	0.314811	-0.129869	0.50195	1.28592	0.0200659	0.362798	1.69754	1.40704	0.000923275	0.492667	3.03467	612	65.7038	7.37158					612
116848	P23528	COF1	Cofilin-1	505	206	0.79445	0.870181	1.2323	0.865941	0.7775	0.783776	1.1356	1.12574	1.15344	COF1	0.64469	0.706145	1	0.702705	0.630935	0.636028	0.921533	0.913533	0.936006	0.965643	0.809072	1.13826	0.837859	0.32018	-0.255221	0.494606	1.17876	0.271221	0.237271	0.566677	1.40687	0.000373037	0.492492	3.42825	166	18.4907	8.08936	Cell motility/Regulation of actin cytoskeleton	Actin-polymerization regulator (15)	7		166
48474259	O43150	ASAP2	Arf-GAP with SH3 domain, ANK repeat and PH domain-containing protein 2	506	5	0.922401	0.956643	0.966914	0.846181	0.861326	0.953693	1.24264	1.24352	1.25627	ASAP2	0.73424	0.761497	0.769674	0.673568	0.685624	0.759149	0.989155	0.989852	1	0.948653	0.887067	1.24747	0.935081	0.164051	-0.0968373	0.785021	1.315	2.97926e-05	0.395058	4.52589	1.40629	0.000442474	0.491896	3.35411	1006	111.581	6.68311	cellProcess	Endocytosis	181		1006
74751644	Q8WZA0	LZIC	Protein LZIC	507	11	0.740469	0.904852	1.19884	0.919808	0.775285	0.780553	1.20124	1.10091	1.17836	LZIC	0.61642	0.753264	0.997998	0.765714	0.645403	0.649789	1	0.916474	0.980949	0.948053	0.825215	1.16017	0.870432	0.436332	-0.200196	0.360183	1.22374	0.197688	0.291295	0.70402	1.4059	0.0039844	0.491492	2.39964	190	21.4811	4.94482					190
300681172	P0CG35	TB15B	Thymosin beta-15B	508	27	0.754712	0.838556	1.06242	0.828225	0.804943	0.876077	1.10918	1.29451	1.12341	TB15B	0.58301	0.647778	0.820714	0.639798	0.621813	0.676763	0.856834	1	0.867824	0.88523	0.836415	1.1757	0.944856	0.631656	-0.0818337	0.199519	1.32813	0.0567615	0.409394	1.24595	1.40564	0.00578754	0.491228	2.23751	45	5.22561	5.36377					45
47117657	P61204	ARF3	ADP-ribosylation factor 3	509	72	0.83705	0.941482	1.13507	0.85533	0.832845	0.833964	1.2287	1.17139	1.14224	ARF3	0.68125	0.766244	0.923798	0.696128	0.677828	0.678739	1	0.953364	0.929638	0.9712	0.840713	1.18078	0.865644	0.210621	-0.208155	0.676499	1.21579	0.0824824	0.281898	1.08364	1.4045	0.000210286	0.490053	3.67719	181	20.5877	7.43018	cellProcess	Endocytosis	209		181
116509	P06703	S10A6	Protein S100-A6	510	256	0.699567	0.741908	0.867471	0.914098	0.83557	0.889257	1.1756	1.26292	1.26411	S10A6	0.553406	0.586901	0.68623	0.723115	0.660994	0.703464	0.929979	0.999059	1	0.769649	0.879642	1.23421	1.14291	0.118481	0.192716	0.926351	1.6036	0.00134527	0.681316	2.87119	1.40308	0.000688065	0.4886	3.16237	90	10.1733	5.47803					90
20138399	Q9NZD2	GLTP	Glycolipid transfer protein	511	5	0.802296	0.924478	1.09991	0.981042	0.797688	0.900314	1.21675	1.33217	1.20633	GLTP	0.602245	0.693961	0.825652	0.736421	0.598786	0.675823	0.913356	1	0.905536	0.942229	0.893015	1.25175	0.947768	0.652708	-0.0773934	0.185281	1.3285	0.0314596	0.4098	1.50225	1.40172	0.00575622	0.487194	2.23986	209	23.8344	7.38623					209
166233266	Q9Y303	NAGA	Putative N-acetylglucosamine-6-phosphate deacetylase	512	4	1.0745	0.967593	1.06714	0.859215	0.711482	0.750852	1.05201	1.10944	1.09002	NAGA	0.968514	0.872148	0.961876	0.77446	0.6413	0.676787	0.948241	1	0.982496	1.03641	0.77385	1.08382	0.746662	0.00940568	-0.421474	2.02661	1.04574	0.284312	0.0645297	0.546205	1.40056	0.00279912	0.486003	2.55298	409	43.7206	6.69775	Carbohydrate metabolism	Amino sugar and nucleotide sugar metabolism	227		409	Amino-sugar metabolism
20137525	Q9NR19	ACSA	Acetyl-coenzyme A synthetase, cytoplasmic	513	13	0.796425	0.835313	0.827014	0.964306	0.872459	0.909815	1.28244	1.27759	1.28668	ACSA	0.618979	0.649203	0.642752	0.749455	0.678072	0.707105	0.996711	0.992939	1	0.819584	0.915527	1.28224	1.11706	0.0302461	0.15971	1.51933	1.5645	2.80594e-06	0.645699	5.55192	1.40055	0.00016514	0.485989	3.78215	701	78.5291	6.45557	Carbohydrate metabolism	Glycolysis / Gluconeogenesis	56		701
126041	P07195	LDHB	L-lactate dehydrogenase B chain	514	181	0.80774	0.900771	1.14717	0.876466	0.76781	0.818328	1.16461	1.13605	1.14637	LDHB	0.693572	0.773453	0.985026	0.752584	0.659285	0.702663	1	0.975479	0.98434	0.951894	0.820868	1.14901	0.862353	0.284122	-0.21365	0.546495	1.20708	0.124381	0.27152	0.905247	1.39975	0.000540364	0.48517	3.26731	334	36.6151	6.04932	Carbohydrate metabolism	Glycolysis / Gluconeogenesis	36		334	Fermentation
145559535	O95361	TRI16	Tripartite motif-containing protein 16	515	7	0.870812	0.968888	1.08588	0.935207	0.802479	0.80594	1.1495	1.14099	1.26539	TRI16	0.688176	0.765683	0.858136	0.739065	0.634175	0.63691	0.908414	0.901694	1	0.975192	0.847875	1.18529	0.869444	0.169087	-0.201834	0.77189	1.21545	0.0468828	0.281487	1.32899	1.39796	0.00471417	0.483322	2.32659	564	63.9146	5.49072					564
130979	P07737	PROF1	Profilin-1	516	370	0.741101	0.831806	1.06886	0.911717	0.810794	0.856705	1.15232	1.18154	1.26172	PROF1	0.587373	0.659264	0.847143	0.722599	0.64261	0.678998	0.913293	0.936454	1	0.880588	0.859738	1.19853	0.976323	0.847972	-0.0345692	0.0716183	1.36105	0.0367269	0.444724	1.43502	1.39406	0.00150779	0.479293	2.82166	140	15.0446	8.26514	Cell motility/Regulation of actin cytoskeleton	Actin-polymerization regulator (15)	1		140
1346188	P48507	GSH0	Glutamate--cysteine ligase regulatory subunit	517	13	0.717059	0.793192	0.927771	0.892907	0.77691	0.848216	1.08972	1.21178	1.20867	GSH0	0.591739	0.654567	0.765625	0.736854	0.64113	0.699975	0.899275	1	0.997434	0.812674	0.839344	1.17006	1.03282	0.72352	0.0465863	0.140549	1.43977	0.00828335	0.525834	2.08179	1.39402	0.00324346	0.479248	2.48899	274	30.7078	6.02393	AminoAcid metbolism	Glutathione metabolism	1767		274	Sulfur metabolism
56749324	Q7L9L4	MOB1B	MOB kinase activator 1B	518	10	0.878893	0.991039	1.22823	0.83207	0.761473	0.784367	1.10316	1.11437	1.09631	MOB1B	0.715579	0.806886	1	0.677456	0.619977	0.638618	0.898176	0.9073	0.892596	1.03272	0.792637	1.10462	0.767524	0.0842889	-0.381717	1.07423	1.06962	0.524033	0.0970952	0.280641	1.3936	0.000129976	0.478812	3.88614	216	25.0746	6.72705	HIPPO	YAP inhibitor	4637		216
74753070	Q9NYJ8	TAB2	TGF-beta-activated kinase 1 and MAP3K7-binding protein 2	519	1	0.883677	0.978555	1.17395	0.767376	0.720027	0.798267	1.1115	1.12003	0.952809	TAB2	0.752737	0.833556	1	0.653669	0.613336	0.679982	0.946801	0.954067	0.811625	1.01206	0.76189	1.06145	0.75281	0.0473921	-0.409642	1.32429	1.0488	0.651367	0.068734	0.186174	1.39318	0.00706993	0.478377	2.15059	693	76.4466	8.54346	TGF	regulator	15		693
13959371	Q9H479	FN3K	Fructosamine-3-kinase	520	2	0.855786	0.812696	0.844824	0.949816	0.88292	0.951247	1.39553	1.18892	1.29074	FN3K	0.613235	0.582358	0.60538	0.680615	0.632678	0.68164	1	0.851952	0.924914	0.837769	0.927994	1.29173	1.1077	0.0255355	0.147564	1.59286	1.54187	0.00174431	0.624681	2.75838	1.39196	0.0046678	0.477117	2.33089	309	35.1489	7.54736					309
311033383	P32455	GBP1	Interferon-induced guanylate-binding protein 1	521	36	0.722869	0.890095	1.03102	0.923492	0.810006	0.861126	1.11852	1.23177	1.25959	GBP1	0.573892	0.706655	0.818535	0.733169	0.643071	0.683656	0.888005	0.977917	1	0.881327	0.864875	1.2033	0.981332	0.870803	-0.0271869	0.0600803	1.36532	0.0312728	0.449241	1.50483	1.39129	0.00335385	0.476428	2.47446	592	67.8877	6.31592					592
55977480	P68371	TBB4B	Tubulin beta-4B chain	522	894	0.838518	0.9818	1.22869	0.90253	0.804606	0.813747	1.23974	1.0735	1.19304	TBB4B	0.676368	0.791943	0.99109	0.728001	0.649013	0.656387	1	0.865912	0.962332	1.01634	0.840294	1.16876	0.826787	0.210478	-0.274412	0.676793	1.14997	0.28714	0.2016	0.541906	1.39089	0.00495303	0.476012	2.30513	445	49.799	4.89404	cellProcess	Phagosome	296		445
327478526	Q7Z406	MYH14	Myosin-14	523	117	0.726969	0.796096	0.909841	0.978817	0.888216	0.863615	1.31961	1.15091	1.32644	MYH14	0.548061	0.600175	0.685927	0.737928	0.669624	0.651078	0.99485	0.867669	1	0.810969	0.910216	1.26565	1.12238	0.194723	0.166563	0.710583	1.56067	0.00438408	0.642164	2.35812	1.3905	0.00614729	0.475601	2.21132	1995	227.732	5.60498	Cell motility/Regulation of actin cytoskeleton	Myosin H/L(9)	3		1995
115502443	O95825	QORL1	Quinone oxidoreductase-like protein 1	524	1	0.869555	0.991889	1.04122	0.919482	0.759782	0.768204	1.14768	1.10627	1.14841	QORL1	0.757179	0.863704	0.906658	0.800654	0.661593	0.668926	0.999357	0.963303	1	0.967554	0.815823	1.13412	0.84318	0.105426	-0.246087	0.977051	1.17215	0.0345439	0.229159	1.46163	1.39016	0.00406608	0.475246	2.39082	349	38.672	5.78271					349
543851	P36405	ARL3	ADP-ribosylation factor-like protein 3	525	18	0.759001	0.841496	1.15812	0.929063	0.822728	0.865255	1.18228	1.20613	1.24487	ARL3	0.609705	0.675973	0.930315	0.746315	0.660897	0.695059	0.949725	0.968887	1	0.919538	0.872349	1.21109	0.948681	0.726016	-0.0760043	0.139054	1.31707	0.076795	0.397329	1.11467	1.38831	0.000701909	0.473333	3.15372	182	20.4428	7.23975					182
13124123	Q13630	FCL	GDP-L-fucose synthase	526	7	0.774037	0.7967	0.954198	0.901634	0.81349	0.848283	1.29063	1.1372	1.12864	FCL	0.599737	0.617297	0.739328	0.698601	0.630305	0.657264	1	0.881124	0.874487	0.841645	0.854469	1.18549	1.01524	0.846687	0.021816	0.0722771	1.40854	0.0112761	0.494199	1.94784	1.3874	0.00481893	0.472383	2.31705	321	35.87	6.59521	Carbohydrate metabolism	Fructose and mannose metabolism	100		321	Nucleotide-sugar biosynthesis
30923274	Q06210	GFPT1	Glutamine--fructose-6-phosphate aminotransferase [isomerizing] 1	527	91	0.765923	0.838657	0.938396	0.91664	0.84317	0.876518	1.13761	1.27012	1.24885	GFPT1	0.603033	0.660298	0.738826	0.721697	0.663851	0.690107	0.895676	1	0.983252	0.847659	0.878776	1.21886	1.03671	0.597383	0.0520122	0.223747	1.43791	0.0045741	0.523977	2.33969	1.387	0.00182179	0.471964	2.7395	699	78.7563	7.10791	Carbohydrate metabolism	Amino sugar and nucleotide sugar metabolism	232		699	Nucleotide-sugar biosynthesis
118519	P16152	CBR1	Carbonyl reductase [NADPH] 1	528	66	0.686324	0.761967	1.05149	0.933776	0.855798	0.835661	1.24531	1.18393	1.20821	CBR1	0.551129	0.611871	0.844359	0.749837	0.687219	0.671049	1	0.950714	0.970215	0.833259	0.875078	1.21248	1.05019	0.735026	0.0706474	0.133697	1.45511	0.0281756	0.541129	1.55013	1.38557	0.000635995	0.470481	3.19655	277	30.3559	8.32373	lipid metabolism	Arachidonic acid metabolism	1034		277
1707892	P52565	GDIR1	Rho GDP-dissociation inhibitor 1	529	95	0.729203	0.854407	1.21581	0.901672	0.78655	0.828283	1.1735	1.13399	1.17858	GDIR1	0.599766	0.702746	1	0.741621	0.646934	0.681259	0.965198	0.932705	0.969374	0.933141	0.838835	1.16202	0.898938	0.562948	-0.153707	0.249532	1.24528	0.193393	0.316473	0.713559	1.38528	0.000896515	0.47018	3.04744	204	23.1927	5.10986	Excretory metabolism	Vasopressin-regulated water reabsorption	2397		204
48428830	P61923	COPZ1	Coatomer subunit zeta-1	530	15	0.891868	0.965926	1.10019	0.88336	0.759611	0.758813	1.02236	1.11719	1.18545	COPZ1	0.752344	0.814816	0.928072	0.745166	0.640777	0.640103	0.862418	0.942414	1	0.985993	0.800594	1.10833	0.811967	0.0656308	-0.300507	1.18289	1.12408	0.188021	0.16874	0.725793	1.38439	0.00806059	0.469247	2.09363	177	20.1855	4.80518					177
74762145	Q15435	PP1R7	Protein phosphatase 1 regulatory subunit 7	531	38	0.780167	0.859333	1.04454	0.903699	0.847306	0.845873	1.27971	1.14968	1.16483	PP1R7	0.609645	0.671509	0.816231	0.706177	0.66211	0.66099	1	0.898391	0.910231	0.894678	0.865626	1.19807	0.967528	0.736791	-0.0476251	0.132655	1.33911	0.0265248	0.421271	1.57635	1.38405	0.00182819	0.468896	2.73798	360	41.5385	4.90674					360
24638466	P46734	MP2K3	Dual specificity mitogen-activated protein kinase kinase 3	532	27	0.807058	0.877883	1.23573	0.864114	0.866551	0.816901	1.20926	1.12437	1.19174	MP2K3	0.6531	0.710414	1	0.699272	0.701244	0.661065	0.978577	0.909883	0.964395	0.973558	0.849188	1.17512	0.872252	0.404766	-0.197182	0.392796	1.20704	0.210182	0.271473	0.677405	1.38382	0.00043473	0.468655	3.36178	347	39.2929	7.43018	MAPK	MAPKK	3528		347
205831092	A8MXQ7	YH010	Putative IQ motif and ankyrin repeat domain-containing protein LOC642574	533	1	0.703766	0.80135	1.10389	0.89188	0.943438	0.834726	1.16092	1.17103	1.3625	YH010	0.516524	0.588145	0.810194	0.654589	0.69243	0.612641	0.852049	0.859468	1	0.86967	0.890015	1.23148	1.02339	0.878096	0.0333612	0.0564581	1.41604	0.0576897	0.501858	1.2389	1.38367	0.00933098	0.468497	2.03007	604	68.253	6.52197					604
2507169	P32119	PRDX2	Peroxiredoxin-2	534	81	0.693689	0.73357	0.887241	1.01963	0.851484	0.890795	1.38227	1.18986	1.24754	PRDX2	0.501846	0.530698	0.64187	0.737647	0.616002	0.644441	1	0.860797	0.902526	0.7715	0.920636	1.27322	1.19331	0.127896	0.254965	0.893144	1.65032	0.00362109	0.722748	2.44116	1.38298	0.00989473	0.467783	2.0046	198	21.8782	5.97314					198
267021	P30626	SORCN	Sorcin	535	27	0.706396	0.799668	1.08653	0.905087	0.808012	0.856224	1.13802	1.17876	1.23632	SORCN	0.571371	0.646814	0.878842	0.732082	0.653564	0.69256	0.920488	0.953446	1	0.864197	0.856441	1.18437	0.991025	0.950647	-0.0130067	0.0219805	1.37048	0.0532045	0.454681	1.27405	1.38289	0.00120389	0.467688	2.91941	198	21.6624	5.59229					198
313104215	Q9NYL2	MLTK	Mitogen-activated protein kinase kinase kinase MLT	536	19	0.783615	0.886917	1.03281	0.818772	0.834041	0.851519	1.03936	1.26041	1.16188	MLTK	0.621715	0.703675	0.819428	0.649609	0.661723	0.67559	0.824618	1	0.921826	0.901115	0.834777	1.15388	0.926383	0.414325	-0.11032	0.382659	1.2805	0.0588511	0.35671	1.23025	1.38226	0.00783306	0.46703	2.10607	800	91.0976	7.86963	Cellular Communication	Tight junction	66		800
47606444	P61457	PHS	Pterin-4-alpha-carbinolamine dehydratase	537	2	0.594873	0.718225	0.733674	1.08084	0.942404	1.03599	1.52224	1.35049	1.35354	PHS	0.390788	0.471821	0.48197	0.710029	0.61909	0.680572	1	0.887174	0.889174	0.682257	1.01974	1.40876	1.49466	0.00489274	0.57982	2.31045	2.06485	0.000535772	1.04603	3.27102	1.38148	0.00510088	0.466214	2.29235	104	11.992	6.80029					104
357529509	Q04446	GLGB	1,4-alpha-glucan-branching enzyme	538	38	0.699799	0.739973	0.998584	0.920301	0.848399	0.862495	1.25021	1.17072	1.21341	GLGB	0.559743	0.591877	0.798731	0.736115	0.678603	0.689878	1	0.936417	0.970565	0.812785	0.877065	1.21145	1.07909	0.540474	0.109809	0.267225	1.49049	0.0144273	0.575789	1.84082	1.38125	0.000462703	0.46598	3.3347	702	80.4226	6.31592	Carbohydrate metabolism	Starch and sucrose metabolism	193		702	Glycan biosynthesis
122066295	O95359	TACC2	Transforming acidic coiled-coil-containing protein 2	539	4	1.05531	1.04237	1.20314	0.726179	0.828329	0.724169	0.979022	1.0891	1.07835	TACC2	0.877127	0.866378	1	0.60357	0.688473	0.601899	0.813723	0.905216	0.896276	1.10027	0.759559	1.04882	0.690337	0.00533928	-0.534627	2.27252	0.953239	0.45561	-0.0690901	0.341406	1.38083	0.00414967	0.465537	2.38199	2948	309.237	4.79248					2948
74762466	Q86YD1	PTOV1	Prostate tumor-overexpressed gene 1 protein	540	1	1.0497	1.09378	1.48141	0.702432	0.722101	0.788731	0.962533	1.07727	1.01523	PTOV1	0.708581	0.738336	1	0.474165	0.487442	0.53242	0.649742	0.727196	0.685312	1.20829	0.737754	1.01834	0.610575	0.0280351	-0.711759	1.5523	0.842795	0.249467	-0.246746	0.602987	1.38033	0.00265812	0.465013	2.57542	416	46.8386	10.5356					416
62287168	Q9NVZ3	NECP2	Adaptin ear-binding coat-associated protein 2	541	15	0.755672	0.849085	1.13348	0.954822	0.832222	0.842521	1.24188	1.15718	1.22638	NECP2	0.60849	0.68371	0.912716	0.768852	0.67013	0.678424	1	0.931794	0.987515	0.912747	0.876522	1.20848	0.960312	0.778161	-0.058425	0.108931	1.324	0.064175	0.404904	1.19263	1.37872	0.00213887	0.463329	2.66982	263	28.3213	8.38232					263
2811007	O00764	PDXK	Pyridoxal kinase	542	16	0.800422	0.82756	1.05175	0.960402	0.829436	0.884187	1.22266	1.19318	1.26776	PDXK	0.631369	0.652776	0.829615	0.757561	0.654256	0.697443	0.964431	0.941179	1	0.893243	0.891342	1.22787	0.997871	0.983836	-0.00307475	0.00707726	1.37462	0.0154223	0.45903	1.81185	1.37755	0.00153395	0.462105	2.81419	312	35.0799	6.12549					312
74727333	Q7LG56	RIR2B	Ribonucleoside-diphosphate reductase subunit M2 B	543	10	0.56045	0.634765	0.77328	1.01223	0.899266	0.993169	1.36054	1.29744	1.34163	RIR2B	0.411931	0.466552	0.568361	0.74399	0.660961	0.72998	1	0.95362	0.986101	0.656165	0.968222	1.33321	1.47558	0.0120041	0.561279	1.92067	2.03182	0.00048291	1.02277	3.31613	1.37696	0.000770414	0.46149	3.11328	351	40.7104	4.97021	DNA replication and Repair	Modulation of nucleotide pools(3)	3		351	Genetic information processing
7387511	O95336	6PGL	6-phosphogluconolactonase	544	34	0.721709	0.744321	0.959934	0.961899	0.830254	0.857563	1.19915	1.19349	1.25499	6PGL	0.575073	0.59309	0.764894	0.76646	0.661563	0.683323	0.955504	0.950994	1	0.808655	0.883239	1.21587	1.09223	0.434071	0.127279	0.362439	1.50358	0.00654732	0.588397	2.18394	1.37661	0.00173517	0.461118	2.76066	258	27.5296	6.04932	Carbohydrate metabolism	Pentose phosphate pathway	33		258	Carbohydrate degradation
21759076	Q14019	COTL1	Coactosin-like protein	545	92	0.619513	0.792114	1.07992	0.94868	0.807347	0.89117	1.28009	1.16794	1.1961	COTL1	0.483959	0.618793	0.843622	0.741102	0.630694	0.696175	1	0.912386	0.934384	0.830514	0.882399	1.21471	1.06247	0.730478	0.087427	0.136393	1.4626	0.0500718	0.548537	1.30041	1.3766	0.00332305	0.46111	2.47846	142	15.935	5.66846					142
74752737	Q9H993	CF211	UPF0364 protein C6orf211	546	12	0.810344	0.900803	1.10156	0.863657	0.80731	0.810013	1.19737	1.11888	1.09696	CF211	0.676768	0.752316	0.919977	0.721293	0.674235	0.676492	1	0.934447	0.916138	0.937568	0.826994	1.13774	0.882063	0.277238	-0.181047	0.557147	1.2135	0.093414	0.279174	1.02959	1.37575	0.000946742	0.460221	3.02377	441	51.1399	5.75732					441
32129514	Q9GZT9	EGLN1	Egl nine homolog 1	547	5	1.01763	1.09764	1.17463	0.951187	0.783738	0.909322	1.2213	1.1749	1.23829	EGLN1	0.821801	0.886422	0.948591	0.768148	0.632921	0.734339	0.986282	0.948808	1	1.09663	0.881415	1.21149	0.803747	0.0335944	-0.315186	1.47373	1.10474	0.0795416	0.143707	1.09941	1.37449	0.00356766	0.458893	2.44762	426	45.9918	8.52881					426
74734311	Q9NQ88	TIGAR	Fructose-2,6-bisphosphatase TIGAR	548	13	0.658893	0.784249	0.921499	1.00058	0.852668	0.928615	1.16379	1.31646	1.34329	TIGAR	0.490507	0.583828	0.686003	0.744872	0.634762	0.6913	0.866371	0.980026	1	0.788214	0.927287	1.27451	1.17644	0.185289	0.234429	0.73215	1.61696	0.00668986	0.693284	2.17458	1.37445	0.00783942	0.458855	2.10572	270	30.0431	7.69385	Carbohydrate metabolism	Fructose and mannose metabolism	116		270
20532206	O75832	PSD10	26S proteasome non-ATPase regulatory subunit 10	549	14	0.688648	0.727519	1.00464	0.929625	0.772502	0.810085	1.19022	1.12332	1.13667	PSD10	0.578587	0.611246	0.844077	0.781051	0.649039	0.680616	1	0.943787	0.955007	0.806936	0.837404	1.15007	1.03776	0.79586	0.0534691	0.0991634	1.42523	0.0278252	0.511197	1.55556	1.37338	0.00374274	0.457728	2.42681	226	24.4124	6.1001	Ubiquitination	26S	5630		226
48428799	P61960	UFM1	Ubiquitin-fold modifier 1	550	12	0.662559	0.784826	1.02635	0.922056	0.79412	0.859297	1.15042	1.23078	1.1554	UFM1	0.538327	0.637668	0.833909	0.749167	0.645219	0.698175	0.934712	1	0.938758	0.82458	0.858491	1.17887	1.04113	0.779211	0.0581438	0.108345	1.42966	0.0322558	0.515668	1.49139	1.37318	0.00208574	0.457524	2.68074	85	9.11187	9.30518					85
62510569	O60869	EDF1	Endothelial differentiation-related factor 1	551	15	0.938471	1.04848	1.29969	0.817929	0.735477	0.723853	1.01086	1.03723	1.07607	EDF1	0.722074	0.80672	1	0.629327	0.565887	0.556943	0.777768	0.798061	0.827948	1.09555	0.759086	1.04139	0.692883	0.0386549	-0.529317	1.4128	0.950563	0.644042	-0.0731463	0.191086	1.3719	0.00130465	0.456171	2.88451	148	16.3589	9.94971					148
109940042	Q14157	UBP2L	Ubiquitin-associated protein 2-like	552	53	0.833715	1.14349	1.26929	0.832814	0.728546	0.714609	1.04652	1.04826	1.02756	UBP2L	0.656836	0.90089	1	0.656126	0.573979	0.562999	0.824496	0.825867	0.809556	1.08216	0.758656	1.04078	0.701054	0.0742066	-0.512402	1.12956	0.96176	0.765467	-0.0562505	0.116073	1.37188	0.00173617	0.456151	2.76041	1087	114.465	7.10791					1087
20138900	O96033	MOC2A	Molybdopterin synthase sulfur carrier subunit	553	3	0.828462	0.941866	1.00371	0.838368	0.760917	0.848455	1.1597	1.06439	1.13379	MOC2A	0.714378	0.812166	0.865491	0.72292	0.656135	0.731618	1	0.917814	0.977664	0.924678	0.815913	1.11929	0.882375	0.135467	-0.180536	0.868167	1.21047	0.029465	0.275563	1.53069	1.37183	0.0015717	0.456099	2.80363	88	9.74921	4.71631					88	Cofactor biosynthesis
28558771	P55211	CASP9	Caspase-9	554	1	0.880405	0.893104	0.962116	0.804928	0.73229	0.789104	1.04216	1.08433	1.06357	CASP9	0.811936	0.823647	0.887292	0.742328	0.67534	0.727735	0.961114	1	0.980858	0.911875	0.77544	1.06335	0.85038	0.0153845	-0.23382	1.81292	1.16612	0.0057671	0.221715	2.23904	1.37129	0.000334318	0.455535	3.47584	416	46.2514	6.04932	Apoptosis	Caspases	3		416
25453240	Q9NTK5	OLA1	Obg-like ATPase 1	555	35	0.807744	0.900739	1.12935	0.878465	0.78116	0.834505	1.12176	1.13623	1.16212	OLA1	0.69506	0.775081	0.971802	0.755915	0.672185	0.718088	0.965271	0.977721	1	0.945945	0.831377	1.14004	0.878885	0.314152	-0.186253	0.502861	1.20518	0.114023	0.269254	0.943009	1.37126	0.000537272	0.455507	3.26981	396	44.7153	7.81104					396
125987829	Q8WUP2	FBLI1	Filamin-binding LIM protein 1	556	20	0.859347	0.953162	1.09863	0.934067	0.802169	0.870666	1.17423	1.19454	1.20502	FBLI1	0.713139	0.790992	0.911712	0.775146	0.665689	0.722532	0.974447	0.991306	1	0.97038	0.868968	1.19126	0.895492	0.270349	-0.159248	0.568075	1.22763	0.0346217	0.295873	1.46065	1.3709	0.00118631	0.45512	2.9258	373	40.6427	6.02393					373
68776070	Q9BUF5	TBB6	Tubulin beta-6 chain	557	421	0.794695	0.91037	1.15159	0.906216	0.799744	0.80803	1.10542	1.13785	1.20164	TBB6	0.661343	0.757608	0.958351	0.754151	0.665545	0.672441	0.919932	0.946915	1	0.952219	0.837997	1.1483	0.880047	0.359881	-0.184348	0.443841	1.20592	0.146032	0.27014	0.835551	1.3703	0.00219799	0.454488	2.65798	446	49.825	4.88135	cellProcess	Phagosome	288		446
12643887	Q9UHV9	PFD2	Prefoldin subunit 2	558	22	0.877952	0.964188	1.27163	0.826628	0.780016	0.774558	1.04456	1.11375	1.1042	PFD2	0.690413	0.758228	1	0.650052	0.613397	0.609105	0.821435	0.875843	0.868332	1.03792	0.793734	1.08751	0.764732	0.112909	-0.386974	0.947273	1.04777	0.70394	0.0673212	0.152464	1.37011	0.000418736	0.454295	3.37806	154	16.6376	6.58057					154
14285501	P78318	IGBP1	Immunoglobulin-binding protein 1	559	22	0.735704	0.854753	1.04744	0.896788	0.844131	0.859314	1.1186	1.22772	1.21547	IGBP1	0.599242	0.696209	0.853153	0.730447	0.687558	0.699924	0.91112	1	0.990021	0.879298	0.866744	1.18727	0.985723	0.898233	-0.0207454	0.0466108	1.35024	0.0338662	0.433221	1.47023	1.3698	0.00107055	0.453966	2.97039	339	39.1975	5.37646					339
126047	P00338	LDHA	L-lactate dehydrogenase A chain	560	218	0.798139	0.924524	1.13567	0.873431	0.803776	0.82762	1.24352	1.08364	1.10396	LDHA	0.641841	0.743476	0.913274	0.702389	0.646374	0.665549	1	0.871429	0.887771	0.952778	0.834943	1.1437	0.876324	0.306291	-0.190463	0.513866	1.20039	0.159197	0.2635	0.798066	1.3698	0.00470658	0.453963	2.32729	332	36.6654	8.26514	Carbohydrate metabolism	Glycolysis / Gluconeogenesis	35		332	Fermentation
119554	P28482	MK01	Mitogen-activated protein kinase 1	561	26	0.730525	0.813249	1.01746	0.920197	0.841437	0.84861	1.27701	1.18885	1.10866	MK01	0.572059	0.636839	0.796757	0.720588	0.658912	0.664529	1	0.930968	0.868173	0.853746	0.870081	1.19151	1.01913	0.863153	0.027343	0.0639124	1.39562	0.0262678	0.480911	1.58058	1.36942	0.00419927	0.453568	2.37683	360	41.3632	6.97607	Cell motility/Regulation of actin cytoskeleton	Regulators(57)	33		360
51316115	Q9UJU6	DBNL	Drebrin-like protein	562	46	0.804868	0.949136	1.10409	0.931903	0.787125	0.861389	1.17162	1.16337	1.19621	DBNL	0.67285	0.793454	0.922993	0.779048	0.658017	0.7201	0.979448	0.972546	1	0.952698	0.860139	1.17707	0.902845	0.38946	-0.14745	0.409537	1.23551	0.0613156	0.305103	1.21243	1.36846	0.00179738	0.452553	2.74536	430	48.1776	5.04639					430
74762146	Q15813	TBCE	Tubulin-specific chaperone E	563	9	0.826969	0.925253	1.19372	0.776348	0.809638	0.805999	1.17525	1.00279	1.08937	TBCE	0.692767	0.775102	1	0.650361	0.678249	0.6752	0.98453	0.840057	0.912588	0.98198	0.797328	1.08914	0.81196	0.168856	-0.30052	0.772484	1.10912	0.423684	0.149422	0.372958	1.36598	0.00458091	0.449942	2.33905	527	59.309	6.75635					527
257051015	Q16775	GLO2	Hydroxyacylglutathione hydrolase, mitochondrial	564	14	0.672048	0.72491	0.767435	0.997018	0.898736	0.945307	1.42443	1.21159	1.24298	GLO2	0.4718	0.508911	0.538765	0.69994	0.630943	0.663638	1	0.85058	0.872614	0.721464	0.94702	1.293	1.31264	0.00468711	0.392467	2.32909	1.79219	0.00135253	0.841725	2.86885	1.36534	0.00867965	0.449258	2.0615	308	33.7843	8.11865	Carbohydrate metabolism	Pyruvate metabolism	280		308	Secondary metabolite metabolism
74735239	Q9Y2S6	TMA7	Translation machinery-associated protein 7	565	10	0.886864	1.07244	1.50748	0.860883	0.73289	0.740847	1.08537	1.04466	1.05703	TMA7	0.58831	0.711416	1	0.571075	0.48617	0.491449	0.719991	0.692985	0.701193	1.15559	0.778207	1.06235	0.673425	0.11587	-0.57041	0.936028	0.919313	0.639538	-0.121372	0.194134	1.36513	0.00274653	0.449038	2.56122	64	7.06193	9.99365					64
13638438	P54577	SYYC	Tyrosine--tRNA ligase, cytoplasmic	566	55	0.860458	0.913497	1.06834	0.859846	0.810249	0.779313	1.03827	1.1561	1.14648	SYYC	0.744277	0.790154	0.924089	0.743748	0.700847	0.674088	0.89808	1	0.991681	0.947431	0.816469	1.11362	0.861771	0.120779	-0.214623	0.918008	1.17541	0.0848543	0.23316	1.07133	1.36394	0.00260697	0.447783	2.58386	528	59.1061	7.04932	Tanslation regulation	Aminoacyl-tRNA biosynthesis	39		528
12643251	Q9UIC8	LCMT1	Leucine carboxyl methyltransferase 1	567	4	0.792421	0.870388	1.00331	0.930947	0.8397	0.84347	1.29339	1.1429	1.12845	LCMT1	0.612668	0.672949	0.775715	0.719771	0.649223	0.652137	1	0.883643	0.872471	0.888705	0.871372	1.18825	0.980497	0.812445	-0.0284152	0.0902058	1.33705	0.0209239	0.419058	1.67936	1.36365	0.00638039	0.447473	2.19515	334	38.354	6.03662					334
3023518	Q99426	TBCB	Tubulin-folding cofactor B	568	36	0.792186	0.949929	1.25614	0.948835	0.777188	0.811187	1.15466	1.16494	1.13795	TBCB	0.630654	0.756231	1	0.75536	0.618714	0.64578	0.919218	0.927401	0.905916	0.999417	0.845736	1.15252	0.84623	0.351778	-0.240878	0.453731	1.15319	0.324565	0.205632	0.488698	1.36274	0.00444561	0.44651	2.35207	244	27.3085	5.14795					244
68566146	Q9NQW7	XPP1	Xaa-Pro aminopeptidase 1	569	37	0.756784	0.785253	0.914187	0.950256	0.82873	0.85598	1.15126	1.19411	1.24253	XPP1	0.609067	0.631979	0.735747	0.764775	0.66697	0.688901	0.926546	0.961034	1	0.818741	0.878322	1.19597	1.07277	0.382823	0.101342	0.417002	1.46074	0.00238807	0.546699	2.62195	1.36165	0.00217495	0.445357	2.66255	623	69.8732	5.66846					623
20139236	Q9NVD7	PARVA	Alpha-parvin	570	29	0.985167	1.00661	1.05009	0.781274	0.872974	0.826196	1.11835	1.16327	1.0955	PARVA	0.846894	0.865326	0.902703	0.671619	0.750447	0.710235	0.961382	1	0.941741	1.01395	0.826815	1.12571	0.815436	0.00458459	-0.294357	2.3387	1.11021	0.0154629	0.150837	1.81071	1.3615	0.000835311	0.445195	3.07815	372	42.2174	5.94775	Cellular Communication	Focal adhesion	136		372
114150028	Q495T6	MMEL1	Membrane metallo-endopeptidase-like 1	571	2	0.653321	0.873502	0.956907	0.826101	0.840857	0.847864	1.2053	1.04172	1.17687	MMEL1	0.542042	0.724719	0.793918	0.685392	0.697635	0.703448	1	0.864287	0.976416	0.82791	0.838274	1.1413	1.01252	0.914609	0.0179478	0.0387648	1.37853	0.0390435	0.463128	1.40845	1.36148	0.0039852	0.445181	2.39955	779	89.3101	5.87158					779
296434426	Q96MW1	CCD43	Coiled-coil domain-containing protein 43	572	4	0.87067	1.02515	1.28523	0.911285	0.841316	0.878494	1.2796	1.13375	1.16644	CCD43	0.677445	0.797641	1	0.709047	0.654605	0.683533	0.995623	0.882141	0.907576	1.06035	0.877032	1.19326	0.827117	0.209283	-0.273837	0.679267	1.12535	0.360327	0.170375	0.443303	1.36057	0.00287675	0.444212	2.5411	224	25.233	4.91943					224
205831580	Q9Y2H0	DLGP4	Disks large-associated protein 4	573	10	0.886872	1.03407	1.15986	0.814093	0.835212	0.816194	1.18637	1.10053	1.06537	DLGP4	0.747552	0.871625	0.977657	0.686206	0.704008	0.687977	1	0.92765	0.898009	1.02693	0.821833	1.11742	0.800279	0.060646	-0.321425	1.2172	1.08812	0.355466	0.121834	0.449202	1.35967	0.00127139	0.443259	2.89572	992	107.945	7.07861					992
12585378	Q99614	TTC1	Tetratricopeptide repeat protein 1	574	11	0.88701	0.947971	1.06116	0.918504	0.823043	0.892085	1.15103	1.19812	1.22766	TTC1	0.722524	0.77218	0.86438	0.748177	0.670419	0.726657	0.937586	0.975942	1	0.965381	0.877877	1.19227	0.909359	0.208539	-0.137079	0.680812	1.23503	0.0151677	0.304541	1.81908	1.35813	0.000963595	0.44162	3.01611	292	33.5052	4.84326					292
121941741	Q2TAA2	IAH1	Isoamyl acetate-hydrolyzing esterase 1 homolog	575	9	0.840437	0.908869	0.999472	0.920978	0.814544	0.841887	1.16303	1.14653	1.19065	IAH1	0.705865	0.763339	0.839434	0.773509	0.684118	0.707082	0.976806	0.962944	1	0.916259	0.859136	1.16674	0.937656	0.365632	-0.0928689	0.436956	1.27337	0.00635024	0.348652	2.19721	1.35803	0.000866071	0.441521	3.06245	248	27.581	5.30029					248
52783206	Q8NC51	PAIRB	Plasminogen activator inhibitor 1 RNA-binding protein	576	56	0.990921	1.32232	1.64066	0.76735	0.671672	0.630408	0.88284	0.981232	0.946104	PAIRB	0.603977	0.805969	1	0.467708	0.409391	0.384241	0.5381	0.598072	0.576661	1.31797	0.68981	0.936725	0.523389	0.0306974	-0.934043	1.5129	0.710735	0.114937	-0.492617	0.93954	1.35795	0.00768186	0.441426	2.11453	408	44.9385	8.646					408
118572662	Q9H1H9	KI13A	Kinesin-like protein KIF13A	577	21	0.846707	0.874726	0.94554	0.943782	0.885869	0.901356	1.23534	1.25806	1.21498	KI13A	0.673025	0.695297	0.751585	0.750187	0.704153	0.716464	0.981937	1	0.965759	0.888991	0.910336	1.23613	1.02401	0.565574	0.0342294	0.247511	1.39048	0.000406403	0.475587	3.39104	1.35788	0.000106919	0.441358	3.97095	1805	202.183	5.60498					1805
23830892	P53004	BIEA	Biliverdin reductase A	578	21	0.789636	0.77132	0.976047	0.894779	0.84668	0.848406	1.17982	1.10549	1.23051	BIEA	0.641715	0.62683	0.793206	0.727162	0.688073	0.689476	0.95881	0.898403	1	0.845668	0.863288	1.17194	1.02084	0.806315	0.0297517	0.0934951	1.38582	0.0120457	0.470738	1.91917	1.35753	0.00145799	0.440986	2.83625	296	33.4073	6.44287					296	Porphyrin-containing compound metabolism
313104079	Q9NR09	BIRC6	Baculoviral IAP repeat-containing protein 6	579	7	0.986597	1.06556	1.16276	0.823306	0.839459	0.764088	0.996604	1.14514	1.15172	BIRC6	0.848497	0.916407	1	0.708062	0.721955	0.657134	0.857103	0.984849	0.990509	1.07164	0.808951	1.09782	0.754873	0.00928985	-0.405695	2.03199	1.02443	0.733936	0.0348263	0.134342	1.35709	0.00653036	0.440521	2.18506	4857	529.919	6.04932	Apoptosis	anti-apoptosis	10		4857
12643797	Q99961	SH3G1	Endophilin-A2	580	30	0.896689	0.985299	1.3606	0.91433	0.775214	0.771782	1.03752	1.14045	1.16146	SH3G1	0.65904	0.724166	1	0.672006	0.56976	0.567237	0.762545	0.838201	0.853641	1.08086	0.820442	1.11315	0.759063	0.156995	-0.397709	0.804115	1.02987	0.837202	0.0424591	0.0771697	1.35676	0.00845676	0.440168	2.0728	368	41.464	5.42725	cellProcess	Endocytosis	63		368
399033	Q01432	AMPD3	AMP deaminase 3	581	13	0.67366	0.677711	0.677009	0.994381	0.85759	0.960165	1.25426	1.26424	1.29509	AMPD3	0.520166	0.523294	0.522752	0.767811	0.662188	0.741391	0.968474	0.976181	1	0.676127	0.937379	1.27119	1.38639	0.00314427	0.471338	2.50248	1.88011	1.1107e-06	0.910819	5.9544	1.35612	0.00147051	0.43948	2.83253	767	88.7556	6.97607	NucleotideMetabolism	Purine metabolism	1283		767	Purine metabolism
547915	P36507	MP2K2	Dual specificity mitogen-activated protein kinase kinase 2	582	20	0.754506	0.883104	1.05153	0.935781	0.790241	0.857866	1.133	1.12272	1.24793	MP2K2	0.604606	0.707654	0.842622	0.749866	0.633241	0.68743	0.907904	0.899666	1	0.896381	0.861296	1.16788	0.960859	0.732552	-0.057604	0.135162	1.30289	0.0458925	0.381713	1.33826	1.35596	0.00619348	0.439317	2.20807	400	44.3961	6.55127	Cell motility/Regulation of actin cytoskeleton	Regulators(57)	32		400
60390855	Q8TF74	WIPF2	WAS/WASL-interacting protein family member 2	583	2	0.81437	0.983445	1.03605	0.786486	0.799435	0.828436	1.13764	1.02786	1.10714	WIPF2	0.715842	0.864461	0.910702	0.691332	0.702714	0.728206	1	0.903505	0.973192	0.944622	0.804786	1.09088	0.851966	0.108945	-0.231132	0.962794	1.15483	0.120913	0.207686	0.917528	1.35549	0.00121803	0.438818	2.91434	440	46.2602	10.9312					440
269849673	P27816	MAP4	Microtubule-associated protein 4	584	288	0.863432	0.940015	1.0393	0.918771	0.772974	0.83693	1.17884	1.10917	1.13794	MAP4	0.732445	0.79741	0.881635	0.779389	0.65571	0.709964	1	0.9409	0.965312	0.947583	0.842892	1.14198	0.889517	0.188522	-0.168905	0.724639	1.20515	0.0238206	0.269215	1.62305	1.35484	0.00307361	0.43812	2.51235	1152	120.93	5.42725					1152
50402236	P62714	PP2AB	Serine/threonine-protein phosphatase 2A catalytic subunit beta isoform	585	45	0.793992	0.878667	1.05861	0.97777	0.83462	0.894294	1.13794	1.25746	1.26975	PP2AB	0.625316	0.692002	0.833718	0.770051	0.657313	0.704309	0.896192	0.990327	1	0.910423	0.902228	1.22172	0.990999	0.930581	-0.0130448	0.031246	1.34192	0.0246182	0.424299	1.60874	1.35411	0.00566375	0.437344	2.2469	309	35.5523	5.42725	Wnt	Catenin-destruction-complex	17		309
327478539	O14562	UBFD1	Ubiquitin domain-containing protein UBFD1	586	13	0.765396	0.84652	0.953739	0.94438	0.74299	0.86815	1.14789	1.16115	1.14778	UBFD1	0.659173	0.729038	0.821377	0.813317	0.639876	0.747666	0.988586	1	0.988485	0.855218	0.85184	1.15227	0.996049	0.96839	-0.00571076	0.0139497	1.34734	0.00558639	0.430117	2.25287	1.35269	0.00696775	0.435827	2.15691	309	33.3609	5.77002					309
119371160	Q96CN7	ISOC1	Isochorismatase domain-containing protein 1	587	2	0.761101	0.678775	0.890676	0.874913	0.884037	0.873188	1.29556	1.12778	1.13647	ISOC1	0.587469	0.523925	0.687484	0.675317	0.68236	0.673986	1	0.870501	0.877208	0.776851	0.877379	1.18661	1.12941	0.178952	0.175563	0.747264	1.52746	0.00761281	0.611131	2.11846	1.35244	0.00480433	0.435568	2.31837	298	32.2161	7.38623					298
122849	P10746	HEM4	Uroporphyrinogen-III synthase	588	3	0.792993	0.870245	1.07933	0.928265	0.85814	0.874522	1.10575	1.27343	1.21857	HEM4	0.62272	0.683384	0.847571	0.728946	0.673879	0.686743	0.868318	1	0.956914	0.914188	0.886976	1.19925	0.970234	0.772863	-0.0435955	0.111897	1.31182	0.0447108	0.391569	1.34959	1.35206	0.00435706	0.435164	2.36081	265	28.6096	5.47803					265	Porphyrin-containing compound metabolism
127983	P22392	NDKB	Nucleoside diphosphate kinase B	589	88	0.770204	0.882519	0.989473	0.841614	0.858869	0.855484	1.18859	1.22094	1.04604	NDKB	0.63083	0.722821	0.810421	0.689318	0.70345	0.700678	0.973504	1	0.856747	0.880732	0.851989	1.15185	0.967365	0.674379	-0.0478682	0.171096	1.30784	0.0309244	0.387182	1.5097	1.35196	0.00514164	0.435051	2.2889	152	17.2869	8.41162	NucleotideMetabolism	Purine metabolism	1172		152
114123	P18085	ARF4	ADP-ribosylation factor 4	590	58	0.821083	0.866521	0.983301	0.889442	0.960794	0.847853	1.29582	1.19643	1.15529	ARF4	0.63364	0.668706	0.758826	0.686394	0.741457	0.654299	1	0.923298	0.891556	0.890302	0.899363	1.21585	1.01018	0.884402	0.014609	0.0533503	1.36566	0.00698135	0.449594	2.15606	1.3519	0.0039988	0.434985	2.39807	180	20.4977	7.13721					180
1730070	P51812	KS6A3	Ribosomal protein S6 kinase alpha-3	591	17	0.792265	0.80604	0.940012	0.908658	0.817831	0.88184	1.06966	1.25373	1.20124	KS6A3	0.631927	0.642913	0.749773	0.724764	0.652318	0.703373	0.853185	1	0.958135	0.846106	0.869443	1.17488	1.02758	0.689387	0.0392535	0.161537	1.38857	0.010405	0.473602	1.98276	1.3513	0.00745981	0.434348	2.12727	740	83.6829	6.88818	MAPK	ERK kinase target	3470		740
23396498	Q96KP4	CNDP2	Cytosolic non-specific dipeptidase	592	34	0.792814	0.831981	0.961168	0.897306	0.841319	0.842836	1.12706	1.15846	1.20269	CNDP2	0.659201	0.691767	0.799182	0.746083	0.699531	0.700792	0.937116	0.963228	1	0.861988	0.860487	1.16274	0.998259	0.979195	-0.00251401	0.00913066	1.3489	0.00558163	0.431787	2.25324	1.35126	0.000456131	0.434301	3.34091	475	52.8449	5.97314	AminoAcid metbolism	Arginine and proline metabolism	1600		475
20141285	Q9Y696	CLIC4	Chloride intracellular channel protein 4	593	75	0.712971	0.813611	1.06023	0.913389	0.784612	0.875285	1.24469	1.11611	1.11591	CLIC4	0.572811	0.653667	0.851807	0.73383	0.630369	0.703216	1	0.896699	0.896536	0.862272	0.857762	1.1589	0.99477	0.969262	-0.00756543	0.013559	1.34401	0.0566761	0.426544	1.2466	1.35108	0.00632583	0.434109	2.19888	253	28.7537	5.59229					253
51315850	Q6GYQ0	RGPA1	Ral GTPase-activating protein subunit alpha-1	594	1	0.696565	0.862198	0.959572	0.786621	0.685637	0.719528	0.958872	1.02227	0.980096	RGPA1	0.681388	0.843412	0.938665	0.769482	0.670698	0.70385	0.937979	1	0.958741	0.839445	0.730595	0.98708	0.870331	0.256548	-0.200363	0.590832	1.17587	0.135018	0.233732	0.869608	1.35106	0.00185289	0.434095	2.73215	2036	229.686	6.18896					2036
126353	P09960	LKHA4	Leukotriene A-4 hydrolase	595	56	0.745785	0.78485	0.861871	0.952456	0.835574	0.911213	1.27345	1.17896	1.19419	LKHA4	0.585642	0.61632	0.676801	0.747935	0.656152	0.715548	1	0.925805	0.937762	0.797502	0.899748	1.21553	1.12821	0.101772	0.174033	0.992372	1.52418	0.00074407	0.60803	3.12839	1.35097	0.00218005	0.433997	2.66153	611	69.2412	6.17627	lipid metabolism	Arachidonic acid metabolism	1043		611	Lipid metabolism
134039205	Q04760	LGUL	Lactoylglutathione lyase	596	21	0.792401	0.838559	1.07737	0.879057	0.808409	0.829497	1.16057	1.11607	1.12001	LGUL	0.682769	0.722541	0.928314	0.757436	0.696562	0.714733	1	0.961658	0.96505	0.902778	0.838987	1.13222	0.92934	0.52089	-0.105722	0.283254	1.25415	0.0623014	0.326706	1.2055	1.3495	0.000317239	0.432428	3.49861	184	20.7642	5.31299	Carbohydrate metabolism	Pyruvate metabolism	278		184	Secondary metabolite metabolism
2498866	Q15404	RSU1	Ras suppressor protein 1	597	25	0.786652	0.815003	0.988537	0.879336	0.838217	0.836305	1.1625	1.12416	1.1586	RSU1	0.676693	0.701081	0.850358	0.756421	0.72105	0.719405	1	0.967019	0.996651	0.863397	0.851286	1.14842	0.985972	0.860504	-0.0203809	0.0652473	1.33012	0.0113791	0.411551	1.94389	1.34904	8.95023e-05	0.431932	4.04817	277	31.5207	8.646					277
34098713	Q9H446	RWDD1	RWD domain-containing protein 1	598	6	0.859067	0.947042	1.11649	0.956493	0.787152	0.869831	1.19115	1.17817	1.1556	RWDD1	0.721208	0.795066	0.937325	0.803	0.660833	0.730245	1	0.989107	0.970154	0.974201	0.871159	1.17497	0.894228	0.316013	-0.161285	0.500295	1.20609	0.058007	0.270337	1.23652	1.34875	0.00370126	0.431622	2.43165	243	27.9224	4.1958					243
113606	P04075	ALDOA	Fructose-bisphosphate aldolase A	599	408	0.737373	0.790856	0.934972	0.954499	0.845241	0.897393	1.22907	1.18411	1.22343	ALDOA	0.599943	0.643458	0.760715	0.776603	0.687707	0.730139	1	0.963421	0.995409	0.821067	0.899044	1.2122	1.09497	0.308636	0.130892	0.510554	1.47638	0.00298078	0.56206	2.52567	1.34833	0.000823422	0.431168	3.08438	364	39.3953	8.08936	Carbohydrate metabolism	Glycolysis / Gluconeogenesis	13		364	Carbohydrate degradation
21903479	P18206	VINC	Vinculin	600	609	0.75789	0.80098	0.971785	0.96997	0.822001	0.878979	1.1869	1.1807	1.23114	VINC	0.6156	0.6506	0.789337	0.787863	0.667675	0.713955	0.964066	0.959032	1	0.843552	0.890317	1.19958	1.05544	0.582253	0.0778416	0.234888	1.42206	0.00610008	0.507982	2.21466	1.34736	0.00253307	0.43014	2.59635	1134	123.722	5.65576	Cell motility/Regulation of actin cytoskeleton	Stabilizer(12)	1		1134
60267755	P26639	SYTC	Threonine--tRNA ligase, cytoplasmic	601	88	0.835789	0.889294	1.05612	0.886176	0.79442	0.830156	1.03449	1.17388	1.17081	SYTC	0.711987	0.757566	0.899678	0.75491	0.676746	0.707188	0.881253	1	0.997382	0.927066	0.836917	1.12639	0.902759	0.276015	-0.147588	0.559068	1.21501	0.0689773	0.280966	1.16129	1.34588	0.00552154	0.428554	2.25794	723	83.3819	6.66846	Tanslation regulation	Aminoacyl-tRNA biosynthesis	14		723
119778	P16930	FAAA	Fumarylacetoacetase	602	18	0.757927	0.851105	0.978873	0.994452	0.842758	0.937526	1.2155	1.22029	1.29851	FAAA	0.583692	0.65545	0.753846	0.765843	0.649022	0.722004	0.936077	0.939762	1	0.862635	0.924912	1.24476	1.07219	0.468481	0.100566	0.329308	1.44298	0.00532432	0.52905	2.27374	1.34582	0.00348922	0.428484	2.45727	419	46.3442	6.94678	AminoAcid metbolism	Tyrosine metabolism	1669		419	Amino-acid degradation
114152158	Q9BQI5	SGIP1	SH3-containing GRB2-like protein 3-interacting protein 1	603	6	0.70218	0.789267	0.808203	1.03278	0.944127	0.903704	1.32718	1.25527	1.29423	SGIP1	0.529078	0.594696	0.608964	0.778178	0.711379	0.680922	1	0.945822	0.975178	0.76655	0.960204	1.29223	1.25263	0.0181685	0.324961	1.74068	1.68577	0.000170031	0.75341	3.76947	1.34579	0.00157065	0.428449	2.80392	828	89.0535	8.22119					828
189046186	Q9UIL1	SCOC	Short coiled-coil protein	604	4	0.877783	0.827391	1.06765	0.93594	0.756349	0.867335	1.16411	1.09574	1.18472	SCOC	0.74092	0.698386	0.90118	0.79001	0.638421	0.732101	0.982601	0.924895	1	0.924273	0.853208	1.14819	0.923112	0.473624	-0.115422	0.324566	1.24226	0.0453236	0.312969	1.34368	1.34573	0.00741502	0.428391	2.12989	159	18.0341	8.85107					159
167008724	Q9UHD1	CHRD1	Cysteine and histidine-rich domain-containing protein 1	605	18	0.88003	1.03258	1.47655	0.838899	0.788375	0.778163	1.04145	1.10196	1.09129	CHRD1	0.596005	0.699321	1	0.568149	0.533931	0.527015	0.705325	0.746311	0.739084	1.12972	0.801812	1.07823	0.709745	0.142428	-0.494628	0.846404	0.954427	0.788932	-0.0672935	0.10296	1.34475	0.000474724	0.427335	3.32356	332	37.4656	7.86963					332
39932727	Q15057	ACAP2	Arf-GAP with coiled-coil, ANK repeat and PH domain-containing protein 2	606	22	0.777006	0.79132	0.87263	0.945132	0.800086	0.87398	1.163	1.16517	1.19391	ACAP2	0.650808	0.662797	0.730901	0.791627	0.670139	0.732032	0.974112	0.975925	1	0.813652	0.873066	1.17403	1.07302	0.311909	0.101678	0.505972	1.44291	0.000328956	0.528982	3.48286	1.34472	0.00220126	0.427303	2.65733	778	87.9732	6.80029	cellProcess	Endocytosis	183		778
2498672	Q99733	NP1L4	Nucleosome assembly protein 1-like 4	607	46	0.955042	1.05262	1.24692	0.831205	0.81774	0.809496	1.04252	1.10084	1.15933	NP1L4	0.765919	0.844178	1	0.666605	0.655807	0.649195	0.836073	0.882847	0.929753	1.08486	0.81948	1.1009	0.755377	0.0367476	-0.404732	1.43477	1.01478	0.870353	0.0211667	0.0603043	1.34341	0.00120377	0.425898	2.91946	375	42.7969	4.69092					375
296453034	Q9H1Z4	WDR13	WD repeat-containing protein 13	608	3	0.94738	0.947538	1.10848	0.887605	0.967498	0.915605	1.34196	1.14502	1.2348	WDR13	0.705969	0.706087	0.826016	0.661426	0.72096	0.682291	1	0.853249	0.920149	1.00113	0.923569	1.24059	0.922525	0.255902	-0.116341	0.591927	1.23919	0.0376328	0.309398	1.42443	1.34326	0.00674019	0.425739	2.17133	485	53.6622	9.14404					485
73620986	Q9UPP1	PHF8	Histone lysine demethylase PHF8	609	1	0.899158	0.904233	0.969298	0.844057	0.801513	0.856385	1.16309	1.10389	1.09295	PHF8	0.773076	0.777439	0.83338	0.725701	0.689122	0.7363	1	0.949095	0.939695	0.92423	0.833985	1.11998	0.902357	0.0323258	-0.14823	1.49045	1.21179	0.00336478	0.277145	2.47304	1.34292	0.00047629	0.425375	3.32213	1060	117.79	8.71924	Chromatin modification	K-demethylases	20		1060
6919871	O14641	DVL2	Segment polarity protein dishevelled homolog DVL-2	610	9	1.03618	0.926635	1.14932	0.815441	0.689081	0.760695	1.01479	1.02521	1.00111	DVL2	0.901558	0.806245	1	0.709497	0.599555	0.661864	0.882943	0.892012	0.871043	1.03738	0.755072	1.0137	0.727865	0.018833	-0.458257	1.72508	0.977175	0.732788	-0.0333106	0.135022	1.34252	0.00225898	0.424946	2.64609	736	78.8986	6.02393	Wnt	DSH	2		736
209572714	Q15633	TRBP2	RISC-loading complex subunit TARBP2	611	2	0.783191	0.864551	1.09418	0.844623	0.801748	0.764206	1.09266	1.06554	1.07692	TRBP2	0.715778	0.790135	1	0.771922	0.732738	0.698427	0.998606	0.973821	0.984222	0.913975	0.803526	1.07837	0.879155	0.313895	-0.18581	0.503215	1.17987	0.153348	0.238627	0.814323	1.34205	0.000361055	0.424437	3.44243	366	39.0147	6.53662					366
59803098	Q16851	UGPA	UTP--glucose-1-phosphate uridylyltransferase	612	45	0.900507	0.93559	1.06828	0.880943	0.813173	0.820395	1.1997	1.05986	1.11496	UGPA	0.750611	0.779854	0.890458	0.734303	0.677814	0.683834	1	0.883435	0.929363	0.968127	0.83817	1.12484	0.865765	0.0789737	-0.207952	1.10252	1.16187	0.074376	0.216448	1.12857	1.34201	0.00337674	0.424401	2.4715	508	56.9047	8.14795	Carbohydrate metabolism	Pentose and glucuronate interconversions	80		508
1352464	P49441	INPP	Inositol polyphosphate 1-phosphatase	613	8	0.696102	0.814122	0.960149	0.920077	0.841901	0.902011	1.19978	1.17148	1.20332	INPP	0.578486	0.676565	0.797919	0.764617	0.69965	0.749603	0.997063	0.973541	1	0.823458	0.887996	1.19153	1.07837	0.464741	0.108858	0.332789	1.44698	0.00878622	0.533044	2.0562	1.34182	0.000293664	0.424186	3.53215	399	43.9702	5.26221	Carbohydrate metabolism	Inositol phosphate metabolism	419		399	Signal transduction
126302556	P20810	ICAL	Calpastatin	614	84	0.90252	0.945898	1.14227	0.91593	0.768636	0.818099	1.09768	1.11165	1.14611	ICAL	0.787465	0.825313	0.99665	0.799166	0.670648	0.713806	0.957748	0.969934	1	0.996896	0.834222	1.11848	0.836819	0.129901	-0.257012	0.886386	1.12196	0.180988	0.166025	0.742351	1.34075	0.00337568	0.423037	2.47164	708	76.5263	5.07178	Apoptosis	anti-apoptosis(17)	17		708
27808673	Q13371	PHLP	Phosducin-like protein	615	1	0.891862	1.0491	1.17039	0.828699	0.820375	0.944142	1.11977	1.24765	1.10753	PHLP	0.714834	0.840865	0.938076	0.664208	0.657536	0.756737	0.897506	1	0.887694	1.03712	0.864405	1.15832	0.833468	0.127343	-0.262802	0.895025	1.11686	0.259153	0.159449	0.586443	1.34002	0.0080635	0.422251	2.09348	301	34.2597	4.729					301
317373590	Q96HC4	PDLI5	PDZ and LIM domain protein 5	616	57	0.808277	0.99082	1.34681	0.848406	0.777769	0.769172	1.13731	1.02056	1.05108	PDLI5	0.600142	0.735679	1	0.629938	0.57749	0.571107	0.844447	0.757759	0.780421	1.04864	0.798449	1.06965	0.761417	0.193174	-0.393241	0.714051	1.02004	0.903025	0.0286231	0.0443001	1.33966	0.00324167	0.421864	2.48923	596	63.9045	8.20654					596
13638228	P50395	GDIB	Rab GDP dissociation inhibitor beta	617	170	0.774598	0.87008	1.14073	0.915965	0.811649	0.84227	1.21758	1.101	1.11787	GDIB	0.636179	0.714599	0.936887	0.752284	0.666609	0.691759	1	0.904254	0.918109	0.92847	0.856628	1.14548	0.922623	0.562572	-0.116187	0.249822	1.23373	0.133522	0.303028	0.874447	1.3372	0.00377213	0.419215	2.42341	445	50.6309	6.46826					445
143811432	Q13177	PAK2	Serine/threonine-protein kinase PAK 2	618	55	0.837861	0.907362	1.1241	0.887886	0.806183	0.812638	1.04986	1.12422	1.17767	PAK2	0.711454	0.77047	0.954512	0.753933	0.684556	0.690037	0.891466	0.954607	1	0.956442	0.835569	1.11725	0.873622	0.250841	-0.194918	0.600602	1.16813	0.161713	0.2242	0.791254	1.33711	0.00343336	0.419118	2.46428	524	58.0059	5.96045	Cell motility/Regulation of actin cytoskeleton	PAKs(6)	2		524
1730187	P51570	GALK1	Galactokinase	619	12	0.682601	0.811251	0.897291	1.00929	0.822441	1.01753	1.31253	1.25019	1.24644	GALK1	0.520064	0.618081	0.683634	0.768961	0.626607	0.775244	1	0.952505	0.949648	0.797048	0.949753	1.26972	1.19159	0.161919	0.252887	0.790701	1.59303	0.00200751	0.671775	2.69734	1.3369	0.0089	0.418888	2.05061	392	42.2456	6.45557	Carbohydrate metabolism	Amino sugar and nucleotide sugar metabolism	241		392	Carbohydrate metabolism
46577660	P61088	UBE2N	Ubiquitin-conjugating enzyme E2 N	620	67	0.852972	0.92903	1.18634	0.904419	0.803452	0.836437	1.11071	1.12028	1.16922	UBE2N	0.718994	0.783106	1	0.76236	0.677252	0.705056	0.936249	0.944319	0.985568	0.989448	0.848103	1.1334	0.857147	0.250066	-0.222385	0.601945	1.14549	0.232794	0.195968	0.633029	1.3364	0.00120759	0.418352	2.91808	152	17.127	6.56592	DNA replication and Repair	Ubiquitination and modification(11)	11		152	Protein modification
74734310	Q9NQ48	LZTL1	Leucine zipper transcription factor-like protein 1	621	4	0.77394	0.761004	0.93143	0.922069	0.838244	0.91553	1.27363	1.12094	1.18119	LZTL1	0.607667	0.59751	0.731321	0.723971	0.658155	0.718837	1	0.880116	0.92742	0.822125	0.891947	1.19192	1.08493	0.316452	0.117601	0.499692	1.4498	0.00632248	0.535854	2.19911	1.33631	0.00445867	0.418253	2.35079	299	34.5711	5.36377					299
20178296	P14618	KPYM	Pyruvate kinase PKM	622	815	0.759561	0.807924	0.985399	0.969108	0.819883	0.885587	1.16551	1.18131	1.22618	KPYM	0.619456	0.658897	0.803637	0.79035	0.668651	0.722236	0.950525	0.963409	1	0.850961	0.891526	1.191	1.04767	0.64323	0.0671828	0.191634	1.39959	0.00872379	0.485005	2.05929	1.33591	0.0030742	0.417822	2.51227	531	57.9	7.84033	Carbohydrate metabolism	Glycolysis / Gluconeogenesis	26		531	Carbohydrate degradation
462567	P34949	MPI	Mannose-6-phosphate isomerase	623	10	0.766798	0.786786	0.86978	1.01032	0.920283	0.924296	1.27032	1.26751	1.27583	MPI	0.601017	0.616684	0.681735	0.791893	0.721319	0.724464	0.995675	0.993472	1	0.807788	0.951634	1.27122	1.17807	0.0288766	0.23643	1.53945	1.5737	0.000126147	0.654163	3.89912	1.33583	0.000410272	0.417733	3.38693	423	46.6258	5.94775	Carbohydrate metabolism	Fructose and mannose metabolism	94		423	Nucleotide-sugar biosynthesis
46577593	P60983	GMFB	Glia maturation factor beta	624	13	0.668851	0.806823	1.11102	0.976048	0.838473	0.86203	1.27701	1.13219	1.16314	GMFB	0.523763	0.631806	0.870014	0.764322	0.65659	0.675038	1	0.886597	0.910828	0.862231	0.892184	1.19078	1.03474	0.838041	0.0492669	0.0767349	1.38105	0.0756901	0.465762	1.12096	1.33468	0.00815782	0.416495	2.08843	142	16.7025	5.2876					142
13637727	O43583	DENR	Density-regulated protein	625	22	0.797755	0.869285	1.07828	0.948647	0.764376	0.869179	1.16853	1.16869	1.10869	DENR	0.682604	0.743809	0.922637	0.811715	0.654043	0.743718	0.999861	1	0.948657	0.915106	0.860734	1.14864	0.940583	0.614321	-0.0883721	0.211605	1.2552	0.054101	0.327913	1.26679	1.33449	0.0072162	0.416285	2.14169	198	22.0781	5.30029					198
3024406	Q13526	PIN1	Peptidyl-prolyl cis-trans isomerase NIMA-interacting 1	626	20	0.784136	0.874743	1.1298	0.951175	0.804503	0.795063	1.15894	1.10066	1.14385	PIN1	0.676598	0.754778	0.974858	0.820728	0.694172	0.686026	1	0.949715	0.986976	0.92956	0.850247	1.13448	0.914677	0.528871	-0.128666	0.27665	1.22045	0.122578	0.287415	0.911587	1.3343	0.00602228	0.416081	2.22024	163	18.232	8.82178					163
212276504	P52306	GDS1	Rap1 GTPase-GDP dissociation stimulator 1	627	40	0.832047	0.95176	1.03278	0.875126	0.831078	0.885958	1.14778	1.20363	1.10715	GDS1	0.691279	0.790739	0.85805	0.72707	0.690474	0.736069	0.953592	1	0.919839	0.938862	0.864054	1.15285	0.920321	0.285083	-0.119791	0.545029	1.22793	0.029676	0.296224	1.52759	1.33424	0.000898417	0.416015	3.04652	607	66.2745	5.31299					607
41688557	O14745	NHRF1	Na(+)/H(+) exchange regulatory cofactor NHE-RF1	628	10	0.912038	0.895102	0.954343	0.93133	0.828266	0.915804	1.14945	1.19076	1.2249	NHRF1	0.744582	0.730755	0.779119	0.760331	0.676191	0.747656	0.938404	0.972129	1	0.920494	0.8918	1.18837	0.968828	0.476869	-0.0456883	0.321601	1.29101	0.000670423	0.368504	3.17365	1.33255	0.00157307	0.414193	2.80325	358	38.8446	5.77002					358
190359497	A6NHX0	GATL2	GATS-like protein 2	629	2	0.834278	0.875344	0.992405	0.893618	0.742249	0.856707	1.15882	1.05619	1.1021	GATL2	0.719939	0.755376	0.856394	0.771146	0.640522	0.739294	1	0.911436	0.951055	0.900675	0.830858	1.1057	0.922483	0.34803	-0.116406	0.458383	1.22764	0.0214366	0.295883	1.66884	1.3308	0.00721108	0.412289	2.142	329	36.0335	5.16064					329
47606436	P60660	MYL6	Myosin light polypeptide 6	630	190	0.790751	0.779141	0.861984	0.938103	0.8913	0.905298	1.31861	1.1233	1.19648	MYL6	0.599684	0.590879	0.653706	0.711433	0.675938	0.686554	1	0.851883	0.907378	0.810625	0.911567	1.2128	1.12452	0.0263901	0.169314	1.57856	1.49613	0.0030141	0.581232	2.52084	1.33045	0.00680245	0.411918	2.16733	151	16.9191	4.65283					151
74746390	Q5TFE4	NT5D1	5'-nucleotidase domain-containing protein 1	631	16	0.866449	0.925511	1.00775	0.91604	0.864214	0.840829	1.1792	1.16448	1.14339	NT5D1	0.734775	0.784861	0.854606	0.77683	0.73288	0.713048	1	0.987511	0.96963	0.933238	0.873694	1.16236	0.936197	0.27056	-0.0951164	0.567736	1.24551	0.00561629	0.316736	2.25055	1.33039	0.000298514	0.411852	3.52504	455	51.8119	6.354					455
74729129	Q8N6H7	ARFG2	ADP-ribosylation factor GTPase-activating protein 2	632	15	0.88925	1.14342	1.43877	0.798237	0.805562	0.771469	1.03591	1.05843	1.06421	ARFG2	0.618063	0.794718	1	0.554806	0.559897	0.5362	0.719994	0.735652	0.739668	1.15715	0.791756	1.05285	0.684232	0.0832749	-0.547442	1.07949	0.909869	0.547713	-0.13627	0.261447	1.32977	4.19818e-05	0.411172	4.37694	521	56.6851	7.98682	cellProcess	Endocytosis	193		521
17380153	Q9UNF1	MAGD2	Melanoma-associated antigen D2	633	43	0.984047	1.06123	1.14382	0.880976	0.781259	0.843176	1.10115	1.12286	1.10713	MAGD2	0.860318	0.9278	1	0.770206	0.683027	0.737159	0.962693	0.981677	0.967922	1.06303	0.835137	1.11038	0.785617	0.0139208	-0.348102	1.85634	1.04454	0.36694	0.0628637	0.435405	1.32958	0.00076159	0.410966	3.11828	606	64.9144	9.31982					606
50403718	P12955	PEPD	Xaa-Pro dipeptidase	634	38	0.788893	0.817074	0.994667	0.958421	0.850502	0.872466	1.15869	1.18641	1.21936	PEPD	0.646972	0.670083	0.815728	0.786003	0.697498	0.71551	0.950242	0.972976	1	0.866878	0.893796	1.18815	1.03105	0.728683	0.0441175	0.137461	1.37061	0.00856813	0.45482	2.06711	1.32933	0.00139537	0.410703	2.85531	493	54.5129	5.99854					493
215273977	P41226	UBA7	Ubiquitin-like modifier-activating enzyme 7	635	10	0.835391	0.879278	0.817105	0.916104	0.911716	0.918555	1.1023	1.29152	1.25399	UBA7	0.646826	0.680806	0.632667	0.70932	0.705922	0.711218	0.853485	1	0.970941	0.843925	0.915458	1.21594	1.08476	0.0182244	0.11738	1.73935	1.44081	0.00359473	0.526883	2.44433	1.32823	0.00655431	0.409503	2.18347	1012	111.624	6.03662	Folding, sorting and degradation	Ubiquitin mediated proteolysis	5		1012	Protein modification
74749416	Q6UX71	PXDC2	Plexin domain-containing protein 2	636	2	0.727976	0.65544	1.02893	0.813378	0.85127	0.836175	1.01333	1.13732	1.17038	PXDC2	0.622001	0.560024	0.879144	0.69497	0.727346	0.714449	0.865818	0.971753	1	0.804115	0.833607	1.10701	1.03668	0.810042	0.0519658	0.0914923	1.37668	0.0708968	0.461194	1.14937	1.32798	0.00507812	0.409228	2.2943	529	59.5455	6.45557					529
20141641	P49589	SYCC	Cysteine--tRNA ligase, cytoplasmic	637	55	0.817445	0.852351	0.908388	0.90032	0.857894	0.844025	1.08788	1.16558	1.2014	SYCC	0.680408	0.709463	0.756105	0.74939	0.714077	0.702532	0.905508	0.970184	1	0.859395	0.867413	1.15162	1.00933	0.811262	0.0133981	0.0908386	1.34004	0.00238784	0.422275	2.62199	1.32765	0.00163222	0.408877	2.78722	748	85.4192	6.75635	Tanslation regulation	Aminoacyl-tRNA biosynthesis	20		748
55977476	P68366	TBA4A	Tubulin alpha-4A chain	638	731	0.856097	0.984571	1.15486	0.92021	0.827004	0.783987	1.20112	1.04653	1.11265	TBA4A	0.712751	0.819714	0.961487	0.766129	0.688529	0.652715	1	0.871297	0.926344	0.998508	0.843734	1.1201	0.844994	0.180079	-0.242987	0.744537	1.12177	0.280099	0.165777	0.552689	1.32755	0.0100897	0.408764	1.99612	448	49.8924	5.05908	cellProcess	Phagosome	280		448
74739481	O14907	TX1B3	Tax1-binding protein 3	639	10	0.8365	0.945602	1.15928	0.8991	0.862319	0.79819	1.21476	1.05624	1.12601	TX1B3	0.688613	0.778427	0.954324	0.740146	0.709868	0.657076	1	0.869505	0.926938	0.980459	0.853203	1.13234	0.870208	0.269142	-0.200568	0.570019	1.1549	0.222703	0.207773	0.652273	1.32716	0.00689102	0.408341	2.16172	124	13.7261	8.48486					124
12643636	O75083	WDR1	WD repeat-containing protein 1	640	194	0.774433	0.864914	1.0675	0.921451	0.820507	0.852656	1.14782	1.11785	1.17713	WDR1	0.6579	0.734766	0.906869	0.782796	0.697042	0.724353	0.975102	0.949638	1	0.902282	0.864872	1.1476	0.958538	0.703926	-0.0610932	0.152473	1.27188	0.049933	0.346966	1.30161	1.3269	0.00118685	0.408059	2.9256	606	66.1519	6.65381					606
296434429	Q7Z6B0	CCD91	Coiled-coil domain-containing protein 91	641	1	0.784914	0.825285	0.914083	0.982237	0.848869	0.852371	1.18257	1.14471	1.2313	CCD91	0.637467	0.670253	0.74237	0.797722	0.689408	0.692251	0.960424	0.929674	1	0.841427	0.894492	1.1862	1.06307	0.413095	0.0882308	0.38395	1.40974	0.00164653	0.495431	2.78343	1.32611	0.00447248	0.407201	2.34945	441	49.9408	5.07178					441
116242737	Q15257	PTPA	Serine/threonine-protein phosphatase 2A activator	642	25	0.860389	0.91379	1.06462	0.880472	0.886468	0.792988	1.22302	1.08805	1.08289	PTPA	0.703497	0.74716	0.870488	0.719917	0.72482	0.648386	1	0.889642	0.885426	0.946267	0.853309	1.13132	0.901764	0.244603	-0.149179	0.611538	1.19556	0.0727081	0.257687	1.13842	1.3258	0.00717346	0.406866	2.14427	358	40.6414	5.93506	Wnt	Catenin-destruction-complex	15		358
55584035	P68104	EF1A1	Elongation factor 1-alpha 1	643	821	0.837016	1.00861	1.19817	0.856078	0.810748	0.777285	1.05014	1.09507	1.09386	EF1A1	0.698578	0.841793	1	0.714487	0.676655	0.648726	0.876452	0.913947	0.912937	1.0146	0.814704	1.07969	0.80298	0.134485	-0.316563	0.871327	1.06415	0.570104	0.0897022	0.244046	1.32525	0.000621498	0.406266	3.20656	462	50.1091	9.01221	Tanslation regulation	RNA Transporter	18		462
353526311	P60174	TPIS	Triosephosphate isomerase	644	194	0.722571	0.825528	1.14142	0.976129	0.810518	0.837452	1.18114	1.10955	1.18659	TPIS	0.608948	0.695715	0.961937	0.822635	0.683066	0.705764	0.995405	0.935077	1	0.896508	0.8747	1.15909	0.975675	0.880427	-0.0355279	0.0553067	1.2929	0.110377	0.370608	0.957122	1.32513	0.00754499	0.406136	2.12234	286	30.7717	5.92236	Carbohydrate metabolism	Glycolysis / Gluconeogenesis	15		286	Carbohydrate biosynthesis
74738534	Q7L1Q6	BZW1	Basic leucine zipper and W2 domain-containing protein 1	645	48	0.983228	1.09079	1.21239	0.831742	0.766539	0.776829	1.02353	1.08814	1.03528	BZW1	0.810984	0.899699	1	0.686036	0.632255	0.640742	0.844223	0.897514	0.853917	1.09547	0.791704	1.04898	0.722708	0.0117971	-0.468515	1.92823	0.957564	0.538042	-0.0625587	0.269184	1.32497	0.000818648	0.405956	3.0869	419	48.0127	5.92236					419
6094511	Q15628	TRADD	Tumor necrosis factor receptor type 1-associated DEATH domain protein	646	6	0.79943	0.785878	0.974197	1.00163	0.86929	0.96712	1.26363	1.20177	1.29363	TRADD	0.617976	0.607501	0.753075	0.77428	0.671979	0.747604	0.976814	0.928997	1	0.853168	0.946013	1.25301	1.10882	0.269229	0.149029	0.569877	1.46866	0.00383076	0.554496	2.41672	1.32452	0.00306373	0.405467	2.51375	312	34.2258	6.26514	Apoptosis	Pro-apoptosis	2		312
74742472	Q5JVS0	HABP4	Intracellular hyaluronan-binding protein 4	647	6	0.82965	0.980227	1.09519	0.903855	0.792304	0.848247	1.22357	1.05521	1.09124	HABP4	0.678057	0.801121	0.895077	0.738704	0.647535	0.693256	1	0.8624	0.891849	0.968355	0.848135	1.12334	0.875852	0.222693	-0.191241	0.652294	1.16005	0.168654	0.214184	0.773003	1.32448	0.0104098	0.405426	1.98256	413	45.7576	7.45947					413
74734327	Q9NRV9	HEBP1	Heme-binding protein 1	648	24	0.682993	0.707871	0.751115	0.962666	0.898444	0.992556	1.13968	1.29296	1.34564	HEBP1	0.50756	0.526048	0.558184	0.715396	0.66767	0.737608	0.846945	0.960849	1	0.713993	0.951222	1.25943	1.33226	0.00225834	0.413872	2.64621	1.76392	0.00109708	0.818786	2.95976	1.32401	0.0104112	0.404914	1.9825	189	21.0835	5.79541					189
1703012	P49902	5NTC	Cytosolic purine 5'-nucleotidase	649	19	0.752373	0.782241	0.886214	0.917285	0.87412	0.88837	1.28069	1.1638	1.10195	5NTC	0.587474	0.610795	0.691981	0.716242	0.682538	0.693664	1	0.908726	0.860435	0.806943	0.893259	1.18215	1.10697	0.112112	0.146612	0.950348	1.46497	0.00479782	0.550872	2.31896	1.32341	0.00585664	0.40426	2.23235	561	64.9283	6.13818	NucleotideMetabolism	Purine metabolism	1158		561
12230353	Q9Y5B8	NDK7	Nucleoside diphosphate kinase 7	650	4	0.946849	1.11421	1.21959	0.954064	0.831199	0.84552	1.09535	1.20223	1.18357	NDK7	0.776367	0.913598	1	0.782283	0.68154	0.693283	0.898127	0.985764	0.970467	1.09355	0.876928	1.16038	0.801908	0.0703572	-0.318491	1.15269	1.06111	0.480388	0.0855785	0.318408	1.32323	0.00509467	0.404069	2.29288	376	42.4643	6.46826	NucleotideMetabolism	Purine metabolism	1171		376
74733099	Q9BT73	PSMG3	Proteasome assembly chaperone 3	651	1	0.848006	0.956013	1.23124	0.836923	0.915285	0.850631	1.12451	1.15141	1.16324	PSMG3	0.688742	0.776464	1	0.67974	0.743385	0.690874	0.913312	0.93516	0.944775	1.01175	0.867613	1.14639	0.857535	0.284077	-0.221733	0.546564	1.13307	0.305457	0.180235	0.51505	1.32131	0.000478411	0.401969	3.3202	122	13.0961	7.88428					122
317373508	Q9UEW8	STK39	STE20/SPS1-related proline-alanine-rich protein kinase	652	13	0.82236	0.934229	1.03339	0.875029	0.799515	0.862023	1.05151	1.16766	1.13038	STK39	0.704282	0.800089	0.885008	0.749389	0.684718	0.738251	0.900529	1	0.968078	0.929991	0.845522	1.11652	0.909172	0.265208	-0.137375	0.576414	1.20057	0.0559241	0.263714	1.2524	1.3205	0.00282055	0.401088	2.54967	545	59.4365	6.29053					545
25008511	Q9P2T1	GMPR2	GMP reductase 2	653	13	0.795076	0.895907	1.00671	0.828974	0.897852	0.879356	1.09931	1.19128	1.15061	GMPR2	0.667411	0.752051	0.845066	0.695866	0.753684	0.738158	0.922793	1	0.965859	0.899232	0.868727	1.14707	0.966077	0.660853	-0.0497906	0.179895	1.27561	0.0205107	0.351186	1.68802	1.3204	0.00116453	0.400976	2.93385	348	37.85	7.2251	NucleotideMetabolism	Purine metabolism	1192		348
317373521	O00233	PSMD9	26S proteasome non-ATPase regulatory subunit 9	654	19	0.824427	0.919743	1.22147	0.871279	0.839038	0.839675	1.09719	1.13038	1.1389	PSMD9	0.674946	0.75298	1	0.713303	0.686908	0.68743	0.898257	0.925423	0.932402	0.988547	0.849997	1.12216	0.859845	0.313038	-0.217851	0.504403	1.13516	0.329132	0.182894	0.48263	1.32019	8.07543e-05	0.400745	4.09283	223	24.6665	6.94678	Ubiquitination	26S	5629		223
6166599	P35579	MYH9	Myosin-9	655	2155	0.771236	0.782067	0.843994	0.936139	0.91607	0.932099	1.30097	1.16023	1.21443	MYH9	0.592817	0.601142	0.648743	0.719571	0.704145	0.716466	1	0.891821	0.933481	0.799099	0.928103	1.22521	1.16144	0.00534688	0.215911	2.2719	1.53324	0.000809229	0.616582	3.09193	1.32012	0.00200365	0.400672	2.69818	1960	226.392	5.60498	Cell motility/Regulation of actin cytoskeleton	Myosin H/L(9)	1		1960
400274	Q02750	MP2K1	Dual specificity mitogen-activated protein kinase kinase 1	656	18	0.817833	0.898516	1.17094	0.904816	0.772661	0.911968	1.18691	1.11141	1.11996	MP2K1	0.689043	0.757021	0.986541	0.762328	0.650985	0.768354	1	0.936388	0.943593	0.962429	0.863148	1.13943	0.896844	0.440416	-0.157071	0.356137	1.18391	0.181177	0.243557	0.741897	1.32008	0.00570546	0.400628	2.24371	393	43.4113	6.62451	Cell motility/Regulation of actin cytoskeleton	Regulators(57)	31		393
62286592	O95352	ATG7	Ubiquitin-like modifier-activating enzyme ATG7	657	11	0.881659	0.849312	0.903198	0.882296	0.815325	0.874234	1.02274	1.15858	1.21166	ATG7	0.727648	0.700951	0.745425	0.728174	0.672902	0.72152	0.844085	0.9562	1	0.878057	0.857285	1.13099	0.976344	0.473571	-0.0345387	0.324615	1.28806	0.0123332	0.365205	1.90892	1.31927	0.0103743	0.399744	1.98404	703	77.9093	6.23975	cellProcess	Regulation of autophagy	26		703
46577654	P61077	UB2D3	Ubiquitin-conjugating enzyme E2 D3	658	9	0.819991	0.945535	1.3616	0.876504	0.814142	0.766355	1.05843	1.05947	1.123	UB2D3	0.602224	0.694427	1	0.643729	0.597929	0.562833	0.77734	0.778105	0.824766	1.04238	0.819	1.0803	0.785705	0.251434	-0.347941	0.599576	1.03638	0.829549	0.0515576	0.081158	1.31905	0.00243185	0.399498	2.61406	147	16.6764	7.79639	Folding, sorting and degradation	Protein processing in endoplasmic reticulum	149		147	Protein modification
125863297	Q53HC0	CCD92	Coiled-coil domain-containing protein 92	659	2	0.946799	0.912252	1.02249	0.863374	0.81022	0.806392	1.01172	1.101	1.15819	CCD92	0.817485	0.787656	0.882838	0.745454	0.69956	0.696254	0.87354	0.950621	1	0.960514	0.826662	1.0903	0.860645	0.0231675	-0.216509	1.63512	1.13512	0.0727535	0.182848	1.13815	1.31892	0.00474204	0.399357	2.32403	331	36.9383	8.89502					331
54038809	P67775	PP2AA	Serine/threonine-protein phosphatase 2A catalytic subunit alpha isoform	660	45	0.969604	1.05913	1.36305	0.829177	0.784086	0.724618	1.02593	1.00405	1.05294	PP2AA	0.711348	0.777027	1	0.608325	0.575243	0.531615	0.752672	0.736618	0.772489	1.13059	0.779294	1.02764	0.689278	0.0459556	-0.536842	1.33766	0.908938	0.438948	-0.137746	0.357587	1.31868	0.0017504	0.399096	2.75686	309	35.5714	5.5415	Wnt	Catenin-destruction-complex	16		309
113944	P04083	ANXA1	Annexin A1	661	281	0.601853	0.717549	0.993384	0.931275	0.917304	0.935439	1.31598	1.14155	1.21359	ANXA1	0.457341	0.545257	0.754861	0.707665	0.697049	0.710829	1	0.867453	0.922189	0.770929	0.928006	1.22371	1.20375	0.248044	0.267537	0.605472	1.58732	0.0232891	0.666589	1.63285	1.31864	0.00436979	0.399052	2.35954	346	38.69	7.02002					346
6685695	Q9Y6K9	NEMO	NF-kappa-B essential modulator	662	18	0.856926	0.892838	1.03961	0.941032	0.816058	0.875427	1.08637	1.14354	1.23591	NEMO	0.693357	0.722413	0.841172	0.761408	0.660289	0.708326	0.879004	0.925262	1	0.929792	0.877506	1.15527	0.943765	0.475816	-0.0834998	0.322561	1.24251	0.0334625	0.313255	1.47544	1.31654	0.00798716	0.396754	2.09761	419	48.1674	5.70654	Ras	PI3K/AKT	2918		419
30913412	Q9BZV1	UBXN6	UBX domain-containing protein 6	663	7	0.798082	0.880501	0.965522	0.873789	0.848685	0.79841	1.15708	1.04852	1.11262	UBXN6	0.689738	0.760969	0.834448	0.755168	0.733472	0.690021	1	0.906181	0.961574	0.881368	0.840295	1.10607	0.953398	0.482973	-0.0688498	0.316078	1.25495	0.0176252	0.327631	1.75386	1.31629	0.00231393	0.39648	2.63565	441	49.7229	6.88818	Folding, sorting and degradation	Protein processing in endoplasmic reticulum	64		441
1709896	P50453	SPB9	Serpin B9	664	7	0.783694	0.868748	0.858087	0.899054	0.932256	0.953465	1.17837	1.24634	1.23896	SPB9	0.628797	0.69704	0.688487	0.721356	0.747996	0.765012	0.945462	1	0.994081	0.836843	0.928258	1.22122	1.10924	0.0423631	0.149569	1.37301	1.45932	0.000362796	0.545297	3.44034	1.31561	0.000393608	0.395728	3.40494	376	42.3763	5.85889					376
52000887	P63104	1433Z	14-3-3 protein zeta/delta	665	303	0.814214	0.856944	1.1158	0.936313	0.846037	0.885423	1.18059	1.14899	1.17902	1433Z	0.689665	0.725858	0.945121	0.793086	0.71662	0.749981	1	0.973228	0.998666	0.928987	0.889258	1.16953	0.957234	0.705299	-0.0630568	0.151627	1.25893	0.0641185	0.332202	1.19302	1.31518	0.000566183	0.395259	3.24704	245	27.7277	4.79248	PI3K	inhibitor/FOXO	3298		245
74753323	Q9UH65	SWP70	Switch-associated protein 70	666	37	0.866088	0.874672	1.00095	0.938131	0.832235	0.861017	1.13344	1.13841	1.18868	SWP70	0.728611	0.735832	0.842063	0.789218	0.700132	0.724345	0.953527	0.957704	1	0.913902	0.877128	1.15351	0.959761	0.53216	-0.0592529	0.273958	1.26218	0.00700698	0.335921	2.15447	1.3151	0.00158124	0.395174	2.801	585	68.9545	5.87158					585
44888286	Q96FW1	OTUB1	Ubiquitin thioesterase OTUB1	667	33	0.767772	0.88302	1.04792	0.917368	0.853454	0.850511	1.12665	1.13137	1.18679	OTUB1	0.646934	0.744042	0.882986	0.772984	0.71913	0.71665	0.94933	0.953303	1	0.899569	0.873778	1.14827	0.971329	0.774563	-0.0419686	0.110943	1.27647	0.0408796	0.352155	1.38849	1.31414	0.000706998	0.394123	3.15058	271	31.2644	4.94482					271
6831528	O94760	DDAH1	N(G),N(G)-dimethylarginine dimethylaminohydrolase 1	668	33	0.783848	0.79655	0.917026	0.947586	0.910398	0.958505	1.2973	1.19339	1.21	DDAH1	0.604215	0.614006	0.706872	0.730429	0.701764	0.738846	1	0.919905	0.932708	0.832475	0.93883	1.23356	1.12776	0.0767658	0.173457	1.11483	1.48181	0.00166774	0.567356	2.77787	1.31394	0.00113254	0.393899	2.94595	285	31.1019	5.80811					285
20178322	P35080	PROF2	Profilin-2	669	39	0.782439	0.848048	1.05236	0.918418	0.859926	0.876599	1.24508	1.07131	1.1712	PROF2	0.628423	0.681117	0.845213	0.737636	0.690657	0.704048	1	0.860433	0.940663	0.894282	0.884981	1.16253	0.989599	0.91629	-0.0150838	0.0379672	1.29996	0.0485287	0.378469	1.314	1.31362	0.00647115	0.393553	2.18902	140	15.0363	6.99072	Cell motility/Regulation of actin cytoskeleton	Actin-polymerization regulator (15)	2		140
52783582	P63172	DYLT1	Dynein light chain Tctex-type 1	670	4	1.08511	1.10118	1.16474	0.873948	0.795561	0.720616	1.01393	1.02194	1.10377	DYLT1	0.931632	0.945426	1	0.750335	0.683035	0.618691	0.870517	0.877391	0.947654	1.11701	0.796708	1.04655	0.71325	0.00316553	-0.487521	2.49955	0.936916	0.134343	-0.0940083	0.871785	1.31359	0.00906826	0.393512	2.04248	113	12.444	5.08447					113
116242483	P11413	G6PD	Glucose-6-phosphate 1-dehydrogenase	671	97	0.709645	0.790865	0.971548	0.987935	0.868236	0.892965	1.21815	1.15863	1.2343	G6PD	0.574938	0.640741	0.787126	0.800402	0.703425	0.723459	0.986913	0.938692	1	0.824019	0.916378	1.20369	1.11208	0.341166	0.153265	0.467034	1.46075	0.00929542	0.546714	2.03173	1.31353	0.00263877	0.393448	2.5786	515	59.219	6.84424	Carbohydrate metabolism	Pentose phosphate pathway	32		515	Carbohydrate degradation
18276665	Q15056	IF4H	Eukaryotic translation initiation factor 4H	672	22	0.786684	1.0551	1.30591	0.868301	0.795758	0.804315	1.10062	1.06369	1.07653	IF4H	0.602403	0.807945	1	0.664901	0.609352	0.615904	0.842803	0.814523	0.82435	1.04923	0.822791	1.08028	0.784184	0.209691	-0.350735	0.678419	1.02959	0.846433	0.0420732	0.0724076	1.31295	0.000526534	0.392808	3.27857	248	27.3684	7.2251					248
2833270	Q15843	NEDD8	NEDD8	673	50	0.742571	0.823817	1.08655	1.01414	0.827295	0.933989	1.2386	1.18674	1.21721	NEDD8	0.599525	0.665121	0.877244	0.818781	0.667929	0.75407	1	0.958135	0.982729	0.884313	0.925141	1.21418	1.04617	0.74485	0.065116	0.127931	1.37302	0.0346818	0.457356	1.4599	1.31243	0.00676437	0.39224	2.16977	81	9.06595	8.42627					81
26007019	P52594	AGFG1	Arf-GAP domain and FG repeat-containing protein 1	674	11	0.86812	1.11499	1.24455	0.861501	0.859705	0.775276	1.06891	1.10813	1.09849	AGFG1	0.697537	0.895901	1	0.692219	0.690775	0.622937	0.858869	0.890382	0.882639	1.07589	0.83216	1.09184	0.773464	0.0993504	-0.370594	1.00283	1.01483	0.892715	0.0212337	0.0492873	1.31205	0.00108337	0.391828	2.96522	562	58.2242	8.63135					562
1707886	P31150	GDIA	Rab GDP dissociation inhibitor alpha	675	115	0.651559	0.765094	0.95838	0.992719	0.874882	0.928694	1.2942	1.18416	1.18758	GDIA	0.503446	0.591172	0.74052	0.767053	0.676003	0.717582	1	0.914979	0.917615	0.791678	0.932098	1.22198	1.17737	0.216669	0.235569	0.664203	1.54353	0.0111975	0.626235	1.95088	1.311	0.00428918	0.390666	2.36763	447	50.5501	5.13525					447
17372671	Q9UBB4	ATX10	Ataxin-10	676	23	0.907204	1.09318	1.21225	0.76574	0.810089	0.794034	0.945082	1.08896	1.07224	ATX10	0.748365	0.901776	1	0.631669	0.668254	0.65501	0.779611	0.898296	0.884507	1.07088	0.789954	1.03543	0.737671	0.0351285	-0.43895	1.45434	0.966898	0.740163	-0.048565	0.130673	1.31074	0.0065343	0.390385	2.1848	475	53.4548	5.24951					475
12643815	Q9NQP4	PFD4	Prefoldin subunit 4	677	20	0.880006	0.939202	1.15631	0.871768	0.791618	0.85972	1.03403	1.11846	1.15456	PFD4	0.761045	0.812239	1	0.753921	0.684606	0.743502	0.894248	0.967261	0.998484	0.99184	0.841035	1.10235	0.847955	0.160343	-0.237941	0.79495	1.11142	0.292624	0.152401	0.53369	1.3107	0.00388733	0.390342	2.41035	134	15.3046	4.52588					134
46397817	P12814	ACTN1	Alpha-actinin-1	678	845	0.801286	0.788223	0.856489	0.961014	0.909661	0.904437	1.29174	1.13615	1.20832	ACTN1	0.620316	0.610204	0.663052	0.74397	0.704215	0.700171	1	0.879553	0.935422	0.815333	0.925037	1.21207	1.13455	0.0165359	0.182123	1.78157	1.4866	0.00132292	0.572012	2.87847	1.31029	0.00406473	0.38989	2.39097	892	102.993	5.41455	ECM	cytoskeleton	11		892
74761962	Q9UHY1	NRBP	Nuclear receptor-binding protein	679	12	0.933773	1.07229	1.13267	0.84742	0.828146	0.77717	1.12299	1.03516	1.0552	NRBP	0.824397	0.94669	1	0.748159	0.731142	0.686138	0.991447	0.913913	0.931604	1.04625	0.817578	1.07112	0.78144	0.0215992	-0.355793	1.66556	1.02377	0.719799	0.0338953	0.142789	1.31011	0.00169759	0.389688	2.77017	535	59.8071	5.08447					535
33112393	Q96QG7	MTMR9	Myotubularin-related protein 9	680	5	0.856675	0.862646	1.07057	0.866982	0.770801	0.894973	1.09152	1.1462	1.08041	MTMR9	0.747407	0.752617	0.934021	0.7564	0.672486	0.78082	0.9523	1	0.942605	0.929964	0.844252	1.10604	0.907833	0.342976	-0.139501	0.464737	1.18934	0.0739301	0.25016	1.13118	1.31009	0.00360161	0.389661	2.4435	549	63.4211	6.39209					549
84029317	Q15018	F175B	BRISC complex subunit Abro1	681	10	0.871001	0.842255	0.950442	0.957997	0.8675	0.964478	1.22823	1.17555	1.24999	F175B	0.696805	0.673808	0.760358	0.766402	0.694004	0.771587	0.982589	0.940442	1	0.887899	0.929992	1.21792	1.04741	0.402709	0.0668216	0.395009	1.37169	0.00108778	0.455954	2.96346	1.30961	0.0016787	0.389133	2.77503	415	46.8719	6.21436					415
308153681	Q01518	CAP1	Adenylyl cyclase-associated protein 1	682	238	0.839498	0.895448	1.13566	0.932691	0.788407	0.84948	1.11696	1.09683	1.15218	CAP1	0.728619	0.777179	0.985667	0.809503	0.684276	0.737283	0.969435	0.951962	1	0.956869	0.856859	1.12199	0.895482	0.37388	-0.159264	0.427268	1.17256	0.148041	0.229664	0.829617	1.30942	0.00409412	0.388928	2.38784	475	51.8687	8.06006					475
126215682	Q96G28	CFA36	Cilia- and flagella-associated protein 36	683	2	0.858843	0.984755	1.2459	1.04241	0.829101	0.936028	1.2445	1.2361	1.19479	CFA36	0.689334	0.790395	1	0.836672	0.665462	0.751285	0.998875	0.992131	0.958978	1.02983	0.935847	1.22513	0.908736	0.508339	-0.138067	0.293846	1.18964	0.164739	0.250525	0.783203	1.30911	0.010353	0.388591	1.98493	342	39.4219	4.97021					342
311033494	P80217	IN35	Interferon-induced 35 kDa protein	684	1	0.841529	0.951449	0.911525	0.913235	0.989689	1.03616	1.28663	1.22133	1.33949	IN35	0.628247	0.710308	0.680503	0.68178	0.738857	0.773549	0.960541	0.911787	1	0.901501	0.979694	1.28248	1.08674	0.179538	0.120003	0.745843	1.42261	0.00124921	0.508539	2.90336	1.30906	0.00362153	0.388535	2.44111	286	31.5267	6.0874					286
20138589	Q15691	MARE1	Microtubule-associated protein RP/EB family member 1	685	40	0.879148	0.97849	1.22953	0.876123	0.773778	0.823554	1.02667	1.10888	1.10033	MARE1	0.715025	0.795821	1	0.712565	0.629326	0.669809	0.835004	0.901869	0.894916	1.02906	0.824485	1.07863	0.801204	0.132087	-0.319759	0.879139	1.04817	0.668621	0.0678699	0.17482	1.30824	0.00297969	0.387629	2.52583	268	29.9802	5.13525					268
205815553	Q9P0J7	KCMF1	E3 ubiquitin-protein ligase KCMF1	686	5	0.979317	0.968252	1.20363	0.993715	0.912783	0.889026	1.31693	1.13385	1.20531	KCMF1	0.743637	0.735235	0.913967	0.75457	0.693115	0.675075	1	0.860977	0.915244	1.0504	0.931841	1.2187	0.88713	0.226234	-0.172782	0.645443	1.16022	0.145823	0.2144	0.836175	1.30784	0.00982365	0.387182	2.00773	381	41.9189	5.65576					381
158706128	Q9ULD2	MTUS1	Microtubule-associated tumor suppressor 1	687	1	0.972784	1.09023	1.0126	0.852188	0.786859	0.851069	1.14619	1.05911	1.04978	MTUS1	0.848713	0.951181	0.88345	0.743498	0.686501	0.742522	1	0.924032	0.915887	1.02521	0.830038	1.08503	0.809631	0.00866866	-0.304663	2.06205	1.05835	0.2648	0.0818171	0.577082	1.3072	0.00245146	0.38648	2.61058	1270	141.309	7.50342					1270
81175200	Q9Y490	TLN1	Talin-1	688	787	0.90391	0.941535	1.10266	0.891021	0.827967	0.834612	1.04913	1.12673	1.16074	TLN1	0.778738	0.811153	0.949968	0.767634	0.713312	0.719037	0.903849	0.970698	1	0.982703	0.8512	1.1122	0.866183	0.109715	-0.207257	0.959734	1.13177	0.135165	0.178586	0.869136	1.30662	0.00249823	0.385843	2.60237	2541	269.599	6.07471	ECM	cytoskeleton	10		2541
51316114	Q9UBI1	COMD3	COMM domain-containing protein 3	689	2	0.992379	0.930685	1.15621	0.966681	0.875188	0.95188	1.27564	1.1853	1.18916	COMD3	0.777946	0.729583	0.906374	0.7578	0.686078	0.746198	1	0.92918	0.93221	1.02642	0.93125	1.2167	0.907276	0.262405	-0.140386	0.581027	1.18538	0.0606915	0.245349	1.21687	1.30652	0.00221879	0.385735	2.65388	195	22.1372	5.98584					195
41019529	O75351	VPS4B	Vacuolar protein sorting-associated protein 4B	690	20	0.833169	0.930694	1.09395	0.877125	0.803931	0.789495	1.05341	1.07709	1.09566	VPS4B	0.760427	0.849438	0.998444	0.800546	0.733742	0.720566	0.961442	0.983051	1	0.952606	0.823517	1.07539	0.864489	0.185221	-0.210081	0.732309	1.12889	0.18627	0.174905	0.729857	1.30585	0.00106717	0.384985	2.97176	444	49.2715	7.2251	cellProcess	Endocytosis	141		444
34582343	Q9P0R6	GSKIP	GSK3-beta interaction protein	691	1	0.849989	0.913714	1.14588	0.932753	0.845514	0.837625	1.14172	1.12517	1.1471	GSKIP	0.740988	0.796541	0.998937	0.813138	0.737087	0.73021	0.995305	0.98088	1	0.969862	0.871964	1.138	0.89906	0.360724	-0.153511	0.442824	1.17336	0.135621	0.230644	0.867674	1.3051	0.00103625	0.384155	2.98453	139	15.6384	4.4751					139
13959419	Q9UJF2	NGAP	Ras GTPase-activating protein nGAP	692	3	0.75659	1.22678	1.2152	0.833827	0.919927	0.798056	1.10999	1.0904	1.1289	NGAP	0.616726	1	0.990555	0.679685	0.749869	0.650527	0.904793	0.888826	0.920214	1.06619	0.850603	1.10976	0.797797	0.246638	-0.325907	0.607939	1.04087	0.792871	0.0577859	0.100797	1.30468	0.00237813	0.383693	2.62376	1139	128.477	8.23584	Ras	Classical	2882		1139
12643302	O95394	AGM1	Phosphoacetylglucosamine mutase	693	45	0.751557	0.880706	1.00179	0.929897	0.824135	0.916471	1.20325	1.13574	1.14466	AGM1	0.624606	0.731939	0.832569	0.772821	0.684925	0.761663	1	0.943892	0.951311	0.878017	0.890168	1.16122	1.01384	0.885967	0.0198282	0.0525827	1.32255	0.019747	0.403317	1.7045	1.30449	0.0023424	0.383489	2.63034	542	59.8143	6.25244	Carbohydrate metabolism	Amino sugar and nucleotide sugar metabolism	211		542	Nucleotide-sugar biosynthesis
257051056	Q9UPY3	DICER	Endoribonuclease Dicer	694	5	0.864025	0.972212	1.07867	0.892605	0.876619	0.873443	1.10558	1.17816	1.16037	DICER	0.733368	0.825196	0.915555	0.757627	0.744058	0.741362	0.938395	1	0.984904	0.971635	0.880889	1.14804	0.906604	0.218621	-0.141455	0.660308	1.18155	0.0549447	0.240682	1.26007	1.30327	0.000294802	0.382137	3.53047	1922	218.542	5.68115					1922
119339	P06733	ENOA	Alpha-enolase	695	511	0.833896	0.953343	1.18402	0.889709	0.800081	0.806731	1.05535	1.0834	1.11472	ENOA	0.704291	0.805174	1	0.75143	0.675732	0.681348	0.891324	0.915019	0.941469	0.99042	0.832174	1.08449	0.840223	0.212289	-0.251156	0.673072	1.09498	0.417611	0.130903	0.379228	1.3032	0.00167266	0.382059	2.77659	434	47.1393	7.38623	Folding, sorting and degradation	RNA degradation	60		434	Carbohydrate degradation
21264427	P30711	GSTT1	Glutathione S-transferase theta-1	696	5	0.748589	0.726131	0.729249	1.03848	0.918852	1.05474	1.3825	1.26763	1.27344	GSTT1	0.541474	0.52523	0.527485	0.751159	0.66463	0.762919	1	0.916908	0.921111	0.734656	1.00402	1.30785	1.36666	0.00343269	0.45065	2.46436	1.78023	0.000112756	0.832061	3.94786	1.30262	0.00590572	0.381411	2.22873	240	27.3176	7.48877	AminoAcid metbolism	Glutathione metabolism	1777		240
215274262	P17931	LEG3	Galectin-3	697	83	0.779818	0.784737	0.898564	0.98744	0.863237	0.894626	1.15869	1.15181	1.26464	LEG3	0.616631	0.620521	0.710528	0.780806	0.682594	0.707414	0.916216	0.910781	1	0.82104	0.915101	1.19171	1.11456	0.155338	0.156479	0.808722	1.45147	0.00224228	0.537513	2.64931	1.30228	0.00608731	0.381034	2.21557	250	26.1361	8.55811	ECM	regulator	45		250
116241311	P53618	COPB	Coatomer subunit beta	698	110	0.908901	0.988735	1.09567	0.898209	0.796958	0.828678	1.05453	1.10846	1.12146	COPB	0.81046	0.881646	0.977	0.800926	0.71064	0.738925	0.940315	0.988406	1	0.997769	0.841282	1.09482	0.843163	0.0645641	-0.246117	1.19001	1.09727	0.168756	0.133914	0.772741	1.30137	0.00219866	0.380031	2.65784	953	107.074	6.04932					953
190411549	A6NDU8	CE051	UPF0600 protein C5orf51	699	1	0.807051	0.903837	1.06655	0.936144	0.937238	0.838963	1.19572	1.17916	1.15299	CE051	0.674947	0.75589	0.891966	0.782909	0.783824	0.701636	1	0.986144	0.964257	0.925811	0.904115	1.17596	0.976565	0.805373	-0.0342121	0.094003	1.27019	0.0310745	0.345044	1.5076	1.30067	0.00146083	0.379256	2.8354	294	33.5986	5.26221					294
81170356	Q9NRN7	ADPPT	L-aminoadipate-semialdehyde dehydrogenase-phosphopantetheinyl transferase	700	6	0.811046	0.960216	1.189	0.7125	0.805512	0.707554	0.950069	1.01055	0.933453	ADPPT	0.682124	0.807583	1	0.599243	0.67747	0.595083	0.799049	0.849919	0.785074	0.986755	0.741856	0.964692	0.751814	0.0990791	-0.411553	1.00402	0.977642	0.853931	-0.0326223	0.0685773	1.30038	0.00488141	0.378931	2.31145	309	35.7531	6.80029					309
12644375	Q01433	AMPD2	AMP deaminase 2	701	28	0.846436	0.889637	1.09627	0.928988	0.809294	0.873828	1.11333	1.13732	1.14442	AMPD2	0.739619	0.777369	0.957923	0.811754	0.707164	0.763555	0.972829	0.993791	1	0.944113	0.870703	1.13169	0.922245	0.433979	-0.116779	0.362531	1.19868	0.0731425	0.261443	1.13583	1.29974	0.00189085	0.378222	2.72334	879	100.624	6.93213	NucleotideMetabolism	Purine metabolism	1282		879	Purine metabolism
729723	P40855	PEX19	Peroxisomal biogenesis factor 19	702	18	0.832274	0.926045	0.994623	0.92597	0.886056	0.906701	1.18407	1.15813	1.1889	PEX19	0.700034	0.778906	0.836587	0.778842	0.745271	0.762635	0.99593	0.974113	1	0.917647	0.906242	1.17703	0.987571	0.82544	-0.018043	0.0833145	1.28266	0.00568353	0.359143	2.24538	1.29881	5.49214e-05	0.377186	4.26026	299	32.7856	4.33545	cellProcess	Peroxisome	3		299
20141658	O43399	TPD54	Tumor protein D54	703	66	0.800574	0.873952	1.01877	0.942377	0.836051	0.895047	1.15768	1.17861	1.13542	TPD54	0.679253	0.741512	0.864384	0.799567	0.709354	0.75941	0.982247	1	0.963352	0.897766	0.891158	1.15724	0.99264	0.930427	-0.0106571	0.0313175	1.28902	0.0164945	0.366273	1.78266	1.29858	0.00131299	0.37693	2.88174	206	22.2243	5.36377					206
132573	P13489	RINI	Ribonuclease inhibitor	704	112	0.712492	0.812627	1.06328	0.957573	0.8398	0.900063	1.16375	1.16253	1.17456	RINI	0.606605	0.691859	0.905257	0.815263	0.714993	0.7663	0.990799	0.989764	1	0.862799	0.899145	1.16695	1.04213	0.757081	0.0595302	0.120858	1.35251	0.0435265	0.435643	1.36125	1.29784	0.0014386	0.376112	2.84206	461	49.9411	4.81787					461
113613	P09972	ALDOC	Fructose-bisphosphate aldolase C	705	102	0.683774	0.766383	0.893292	0.97471	0.819963	0.931666	1.16464	1.181	1.19227	ALDOC	0.573506	0.642793	0.749237	0.817525	0.687733	0.781422	0.976824	0.990548	1	0.78115	0.90878	1.1793	1.16339	0.170195	0.218331	0.769054	1.5097	0.00292572	0.594263	2.53377	1.29768	0.00445136	0.375932	2.35151	364	39.4312	6.87354	Carbohydrate metabolism	Glycolysis / Gluconeogenesis	12		364	Carbohydrate degradation
23831360	P31939	PUR9	Bifunctional purine biosynthesis protein PURH	706	70	0.858937	0.953969	1.22028	0.898048	0.797065	0.842787	1.10367	1.09066	1.09841	PUR9	0.703884	0.781761	1	0.735935	0.653181	0.690649	0.904435	0.893775	0.900128	1.01106	0.845967	1.09758	0.83671	0.214533	-0.2572	0.668506	1.08557	0.468792	0.118451	0.32902	1.29742	0.0010286	0.375651	2.98775	592	64.5753	6.7124	NucleotideMetabolism	Purine metabolism	1156		592	Purine metabolism
21264498	P30520	PURA2	Adenylosuccinate synthetase isozyme 2	707	27	0.84124	0.960598	1.1326	0.906339	0.799963	0.855719	1.13247	1.09464	1.09674	PURA2	0.742753	0.848139	1	0.800231	0.70631	0.755537	0.99989	0.96649	0.968342	0.978145	0.854007	1.10795	0.873089	0.23977	-0.1958	0.620205	1.13271	0.203359	0.179775	0.691737	1.29736	0.00154857	0.375575	2.81007	456	50.0658	6.55127	NucleotideMetabolism	Purine metabolism	1281		456	Purine metabolism
51701935	Q15819	UB2V2	Ubiquitin-conjugating enzyme E2 variant 2	708	31	0.841861	1.00901	1.15623	0.915747	0.867264	0.780775	1.06364	1.12947	1.13108	UB2V2	0.728106	0.872669	1	0.792009	0.750076	0.675274	0.919914	0.976849	0.978246	1.00237	0.854595	1.10806	0.852577	0.209892	-0.230099	0.678004	1.10544	0.321451	0.144625	0.492885	1.29659	0.00500644	0.374724	2.30047	145	16.3522	8.08936	DNA replication and Repair	Ubiquitination and modification	10		145
308153415	Q5JSZ5	PRC2B	Protein PRRC2B	709	6	0.971832	1.14486	1.29387	0.85741	0.809552	0.782742	1.05966	1.11542	0.998628	PRC2B	0.751106	0.884834	1	0.662672	0.625684	0.604963	0.818989	0.862079	0.771817	1.13685	0.816568	1.0579	0.718271	0.0285416	-0.4774	1.54452	0.930554	0.469722	-0.103839	0.328159	1.29555	0.00386697	0.373562	2.41263	2229	242.817	8.33838					2229
47116943	Q9UBQ7	GRHPR	Glyoxylate reductase/hydroxypyruvate reductase	710	28	0.716652	0.762854	0.81892	0.954771	0.924586	0.952328	1.28308	1.1809	1.20381	GRHPR	0.558539	0.594548	0.638244	0.744123	0.720598	0.742219	1	0.920365	0.938218	0.766142	0.943895	1.2226	1.23201	0.00464234	0.301014	2.33326	1.59579	0.000438143	0.674268	3.35838	1.29527	0.00100779	0.373253	2.99663	328	35.6457	7.38623	Carbohydrate metabolism	Pyruvate metabolism	281		328
50402099	P62495	ERF1	Eukaryotic peptide chain release factor subunit 1	711	37	0.938696	0.999399	1.16799	0.872147	0.799612	0.847597	1.0375	1.13416	1.09108	ERF1	0.803687	0.855659	1	0.746709	0.684606	0.72569	0.888282	0.971034	0.934153	1.03536	0.839785	1.08758	0.811104	0.0528173	-0.302041	1.27722	1.05043	0.519695	0.0709865	0.284251	1.29507	0.00213393	0.373028	2.67082	437	49.0002	5.70654	Tanslation regulation	mRNA surveillance pathway	32		437
32129605	Q9NWT6	HIF1N	Hypoxia-inducible factor 1-alpha inhibitor	712	6	0.863467	1.03427	1.05727	0.9221	0.860139	0.905744	1.18435	1.21633	1.07808	HIF1N	0.709896	0.850324	0.869233	0.758101	0.70716	0.744654	0.97371	1	0.886338	0.985005	0.895995	1.15959	0.909635	0.235934	-0.136641	0.627209	1.17724	0.0778572	0.235408	1.1087	1.29419	0.00448947	0.372049	2.3478	349	40.2599	5.56689					349
10720285	Q9UNH7	SNX6	Sorting nexin-6	713	62	0.797879	0.827384	0.937063	0.958617	0.818635	0.896785	1.19988	1.11471	1.14588	SNX6	0.664965	0.689555	0.780963	0.798927	0.682264	0.747395	1	0.929015	0.954993	0.854108	0.891346	1.15349	1.0436	0.559626	0.0615665	0.252102	1.35052	0.00366295	0.433513	2.43617	1.2941	0.00527591	0.371946	2.2777	406	46.6198	6.16357					406
166971548	Q5SNT6	FA21B	WASH complex subunit FAM21B	714	30	0.854814	0.871742	1.01818	0.955601	0.834815	0.836282	1.13638	1.09369	1.16855	FA21B	0.731518	0.746004	0.871321	0.817767	0.714403	0.715659	0.972468	0.935943	1	0.914912	0.875566	1.13287	0.956994	0.580469	-0.0634175	0.236221	1.23823	0.0178812	0.308281	1.7476	1.29388	0.00482363	0.371699	2.31663	1253	136.887	4.81787
110826413	O60749	SNX2	Sorting nexin-2	715	26	0.868011	0.892965	0.990102	0.954069	0.830161	0.852236	1.21601	1.08083	1.11431	SNX2	0.71382	0.734341	0.814223	0.784592	0.682694	0.700847	1	0.888836	0.916371	0.917026	0.878822	1.13705	0.958339	0.513291	-0.0613916	0.289636	1.23993	0.0162471	0.310263	1.78922	1.29384	0.00979346	0.371654	2.00906	519	58.4347	5.12256					519
1351970	P48444	COPD	Coatomer subunit delta	716	72	0.912157	0.961472	1.15179	0.917756	0.78544	0.813271	1.04057	1.0952	1.11933	COPD	0.791946	0.834763	1	0.796808	0.681929	0.706092	0.903432	0.950865	0.971813	1.00847	0.838822	1.08503	0.831774	0.111759	-0.265736	0.951716	1.07591	0.374618	0.105561	0.426411	1.29352	0.00612244	0.371297	2.21308	511	57.1741	6.21436					511
1718191	P51452	DUS3	Dual specificity protein phosphatase 3	717	20	0.708625	0.774742	1.08095	0.965277	0.803042	0.860891	1.10389	1.14536	1.14842	DUS3	0.617042	0.674613	0.941251	0.840524	0.699256	0.749628	0.961225	0.997331	1	0.854774	0.876403	1.13256	1.0253	0.87013	0.0360522	0.0604161	1.32498	0.0740914	0.405971	1.13023	1.29228	0.00667547	0.369919	2.17552	185	20.4653	7.79639	MAPK	phasphotase inhibit ERK	3455		185
2506788	P53611	PGTB2	Geranylgeranyl transferase type-2 subunit beta	718	6	0.755409	0.850902	1.07249	0.953166	0.8427	0.907442	1.16864	1.15798	1.16631	PGTB2	0.646402	0.728115	0.917725	0.815622	0.721096	0.776496	1	0.990881	0.998005	0.892933	0.901103	1.16431	1.00915	0.938341	0.0131394	0.0276395	1.30391	0.0446576	0.382849	1.3501	1.29209	0.00122101	0.369709	2.91328	331	36.9003	5.03369					331
29839768	O43768	ENSA	Alpha-endosulfine	719	9	0.803278	1.02579	1.24858	0.866315	0.797981	0.813326	1.10779	1.07835	1.01501	ENSA	0.643352	0.821562	1	0.693839	0.639109	0.6514	0.887236	0.863656	0.81293	1.02588	0.825874	1.06705	0.805037	0.199315	-0.312872	0.700461	1.04013	0.769773	0.0567592	0.113637	1.29202	0.00215996	0.369631	2.66555	121	13.3808	7.23975					121
125987702	Q9BTE6	AASD1	Alanyl-tRNA editing protein Aarsd1	720	9	0.800561	0.949329	1.1414	0.87154	0.857225	0.837427	1.03357	1.13967	1.14212	AASD1	0.700941	0.831197	0.999365	0.763088	0.750554	0.733219	0.904955	0.997851	1	0.963763	0.855398	1.10512	0.88756	0.335827	-0.172084	0.473885	1.14667	0.249238	0.197454	0.603386	1.29194	0.00254392	0.369538	2.5945	412	45.4513	6.41748					412
1709337	P55209	NP1L1	Nucleosome assembly protein 1-like 1	721	38	0.953789	1.03087	1.24832	0.882124	0.771435	0.790251	0.986527	1.08767	1.083	NP1L1	0.76406	0.825808	1	0.70665	0.61798	0.633053	0.790285	0.871307	0.867566	1.07766	0.814603	1.0524	0.755901	0.0497529	-0.403731	1.30318	0.976559	0.801712	-0.0342212	0.0959817	1.29191	0.00745519	0.36951	2.12754	391	45.3459	4.4624					391
6136060	Q15631	TSN	Translin	722	12	0.989497	0.96763	1.08111	0.888603	0.867824	0.837646	1.14715	1.09055	1.1124	TSN	0.862568	0.843506	0.942426	0.774616	0.756502	0.730195	1	0.950658	0.969701	1.01274	0.864691	1.1167	0.85381	0.0172587	-0.228014	1.76299	1.10265	0.0539623	0.140971	1.26791	1.29144	0.000340149	0.368985	3.46833	228	26.1668	6.44287					228
51316094	Q9H0A8	COMD4	COMM domain-containing protein 4	723	6	0.951004	0.993014	1.04233	0.829625	0.88194	0.864799	1.17369	1.10677	1.0448	COMD4	0.810266	0.846058	0.888073	0.706849	0.751422	0.736818	1	0.942981	0.890179	0.995448	0.858788	1.10842	0.862715	0.0110519	-0.213044	1.95656	1.11349	0.0684958	0.155088	1.16434	1.29068	0.0034463	0.368132	2.46265	199	21.7503	7.31299					199
21263481	Q9BR76	COR1B	Coronin-1B	724	35	0.764148	0.780817	0.920829	0.95127	0.853262	0.900384	1.08686	1.17055	1.23323	COR1B	0.619632	0.633149	0.746681	0.771366	0.691893	0.730103	0.88131	0.949174	1	0.821931	0.901639	1.16354	1.09698	0.235752	0.133532	0.627545	1.41562	0.00638249	0.501437	2.19501	1.29048	0.00680148	0.367905	2.1674	489	54.2003	5.88428					489
92090606	P07900	HS90A	Heat shock protein HSP 90-alpha	725	624	0.953504	1.06483	1.35223	0.825678	0.789745	0.772307	1.03532	1.02548	1.0201	HS90A	0.705137	0.787465	1	0.610607	0.584034	0.571138	0.765638	0.758362	0.754387	1.12352	0.79591	1.02696	0.708408	0.0522142	-0.497348	1.28221	0.91406	0.462192	-0.12964	0.335178	1.2903	0.000144896	0.367708	3.83894	732	84.6067	5.021	ECM	regulator	53		732
223634676	Q92734	TFG	Protein TFG	726	50	0.793498	0.782706	0.929793	0.982092	0.88141	0.932808	1.24338	1.12654	1.23808	TFG	0.638177	0.629498	0.747793	0.789855	0.708881	0.750218	1	0.906029	0.995739	0.835332	0.932103	1.20267	1.11585	0.156435	0.158139	0.805665	1.43975	0.00377577	0.525817	2.42299	1.29027	0.00484485	0.367678	2.31472	400	43.4212	5.09717					400
223590110	Q07866	KLC1	Kinesin light chain 1	727	66	0.89522	0.956566	1.07358	0.92216	0.846658	0.841516	1.15107	1.09917	1.11725	KLC1	0.777726	0.831019	0.932676	0.801129	0.735537	0.731069	1	0.95491	0.970618	0.975122	0.870111	1.1225	0.89231	0.146827	-0.164383	0.833195	1.15114	0.053815	0.203061	1.2691	1.29007	0.00111799	0.367444	2.95156	573	65.2689	6.20166					573
21542000	Q16543	CDC37	Hsp90 co-chaperone Cdc37	728	94	0.852197	0.992684	1.2203	0.888726	0.799438	0.844763	1.05015	1.10491	1.10965	CDC37	0.69835	0.813474	1	0.728284	0.655115	0.692258	0.860568	0.905438	0.909322	1.02173	0.844309	1.08824	0.826354	0.183019	-0.275168	0.737504	1.06509	0.574501	0.0909804	0.240709	1.28891	0.00160452	0.366148	2.79465	378	44.44	5.24951	PI3K	Enhencer AKT	3238		378
317373486	P49023	PAXI	Paxillin	729	18	0.941193	1.21583	1.49792	0.848251	0.743202	0.750394	1.05396	0.992539	0.971566	PAXI	0.628332	0.811676	1	0.566285	0.496155	0.500957	0.703612	0.662611	0.648609	1.21831	0.780616	1.00602	0.640734	0.0561083	-0.642202	1.25097	0.825748	0.261733	-0.276227	0.582142	1.28875	0.00579055	0.365976	2.23728	591	64.4639	6.18896	ECM	Organizer	6		591
74751646	Q8WZA9	IRGQ	Immunity-related GTPase family Q protein	730	19	0.764581	0.893821	1.04931	0.898809	0.879175	0.935333	1.17307	1.16105	1.16179	IRGQ	0.651779	0.761952	0.894502	0.766204	0.749467	0.79734	1	0.989759	0.990385	0.902571	0.904439	1.1653	1.00207	0.983307	0.00298347	0.00731078	1.29109	0.0332669	0.368594	1.47799	1.28843	0.000102967	0.36561	3.9873	623	62.6785	4.88135					623
6831517	Q9Y281	COF2	Cofilin-2	731	126	0.78678	0.827032	1.12255	0.903886	0.865682	0.876059	1.07838	1.11783	1.21169	COF2	0.649325	0.682544	0.926432	0.745971	0.714442	0.723007	0.889981	0.922538	1	0.91212	0.881875	1.13597	0.966842	0.790452	-0.0486484	0.102125	1.24541	0.118665	0.316625	0.925679	1.28813	0.00349372	0.365273	2.45671	166	18.7249	7.88428	Cell motility/Regulation of actin cytoskeleton	Actin-polymerization regulator (15)	8		166
20139075	Q96SU4	OSBL9	Oxysterol-binding protein-related protein 9	732	5	1.07638	1.15917	1.27283	0.789433	0.818821	0.760817	1.01299	1.06396	0.972563	OSBL9	0.845663	0.910702	1	0.620221	0.643309	0.597739	0.79586	0.835906	0.764097	1.16946	0.78969	1.01651	0.675262	0.00306361	-0.566481	2.51377	0.869211	0.0714978	-0.202222	1.14571	1.28722	0.00192474	0.364259	2.71563	736	83.1324	6.17627					736
1171639	P46926	GNPI1	Glucosamine-6-phosphate isomerase 1	733	17	0.87772	0.867585	0.91117	0.875608	0.88435	0.898339	1.17952	1.11504	1.12574	GNPI1	0.744134	0.735542	0.772494	0.742344	0.749756	0.761616	1	0.945331	0.954406	0.885492	0.886099	1.1401	1.00069	0.969091	0.000989646	0.0136354	1.28753	0.000440088	0.364606	3.35646	1.28665	0.000269055	0.363617	3.57016	289	32.6476	6.91748	Carbohydrate metabolism	Amino sugar and nucleotide sugar metabolism	229		289
73621340	O95747	OXSR1	Serine/threonine-protein kinase OSR1	734	27	0.78603	0.874347	1.07452	0.909923	0.80833	0.90471	1.08621	1.14172	1.14426	OXSR1	0.686935	0.764118	0.939057	0.795209	0.706424	0.790653	0.949274	0.997779	1	0.911633	0.874321	1.12406	0.959071	0.704348	-0.0602902	0.152213	1.23302	0.0719785	0.302196	1.1428	1.28564	0.00279418	0.362486	2.55375	527	57.9861	6.43018					527
20141702	P23526	SAHH	Adenosylhomocysteinase	735	66	0.80288	0.855103	1.02848	0.921742	0.873002	0.86231	1.16573	1.09905	1.14991	SAHH	0.688735	0.733533	0.882262	0.790698	0.748887	0.739715	1	0.9428	0.986428	0.895488	0.885685	1.13823	0.989053	0.896267	-0.0158808	0.0475628	1.27107	0.0269126	0.346048	1.57004	1.28514	0.000747224	0.361929	3.12655	432	47.6852	6.34131	AminoAcid metbolism	Cysteine and methionine metabolism	1514		432	Amino-acid biosynthesis
284018172	Q9Y4E1	FA21C	WASH complex subunit FAM21C	736	26	0.858954	0.875544	0.999807	0.914643	0.796651	0.823153	1.08662	1.11113	1.05829	FA21C	0.773048	0.78798	0.899815	0.823168	0.716976	0.740828	0.977943	1	0.952449	0.911435	0.844816	1.08534	0.926907	0.30765	-0.109503	0.511944	1.19081	0.0208221	0.251942	1.68148	1.28471	0.00346484	0.361445	2.46032	1318	144.581	4.79248					1318
18202671	Q99836	MYD88	Myeloid differentiation primary response protein MyD88	737	5	0.825553	0.943073	1.17292	0.896975	0.84563	0.842894	1.1779	1.05993	1.08352	MYD88	0.700871	0.800641	0.995778	0.761505	0.717915	0.715593	1	0.89985	0.919881	0.980516	0.861833	1.10712	0.878958	0.315498	-0.186133	0.501004	1.12912	0.30689	0.175195	0.513018	1.28461	0.0036179	0.361328	2.44154	296	33.212	6.15088	NFKappaB	IL1B/R	4555		296
51315863	Q6NSW5	FA45B	Protein FAM45B	738	7	0.880105	1.00572	1.04089	0.986868	0.910823	0.932949	1.24753	1.17081	1.2179	FA45B	0.705479	0.806168	0.83436	0.791059	0.730102	0.747838	1	0.938502	0.976248	0.975569	0.943546	1.21208	0.967175	0.583549	-0.0481508	0.233923	1.24243	0.0116301	0.313165	1.93441	1.2846	0.00107264	0.361315	2.96955	357	40.4879	6.53662					357
38258902	P13798	ACPH	Acylamino-acid-releasing enzyme	739	34	0.894875	0.904555	1.01489	0.945911	0.83746	0.884745	1.09084	1.15688	1.17771	ACPH	0.759841	0.768061	0.861749	0.803176	0.71109	0.75124	0.926233	0.982312	1	0.938108	0.889372	1.14181	0.948049	0.382067	-0.0769669	0.417861	1.21714	0.0119183	0.283497	1.92378	1.28384	0.0034934	0.360464	2.45675	732	81.1726	5.47803					732
74723936	Q8TDQ7	GNPI2	Glucosamine-6-phosphate isomerase 2	740	9	0.815264	0.864234	0.935906	0.942907	0.878592	0.958294	1.28069	1.16383	1.12249	GNPI2	0.636584	0.674821	0.730785	0.736251	0.686032	0.748266	1	0.908757	0.876472	0.871801	0.926598	1.189	1.06285	0.268669	0.0879438	0.570782	1.36384	0.00575369	0.447679	2.24005	1.28319	0.00790643	0.359736	2.10202	276	31.0646	6.94678	Carbohydrate metabolism	Amino sugar and nucleotide sugar metabolism	230		276
20140879	Q9P2Y5	UVRAG	UV radiation resistance-associated gene protein	741	3	0.9431	0.881918	0.895443	0.898672	0.819044	0.866266	1.0963	1.06188	1.15714	UVRAG	0.815025	0.762151	0.77384	0.77663	0.707816	0.748625	0.947424	0.917678	1	0.90682	0.861327	1.10511	0.949832	0.199662	-0.0742554	0.699704	1.21867	0.00406446	0.285303	2.391	1.28303	0.00253182	0.359558	2.59657	699	78.1022	8.29443					699
6648092	P37837	TALDO	Transaldolase	742	134	0.805645	0.763182	0.890557	0.934	0.925338	0.911312	1.10988	1.19917	1.2441	TALDO	0.647572	0.613441	0.715824	0.750743	0.74378	0.732506	0.892115	0.963885	1	0.819795	0.92355	1.18438	1.12656	0.0525123	0.171927	1.27974	1.44473	0.0025769	0.530802	2.5889	1.28243	0.00285454	0.358875	2.54446	337	37.5165	6.81494	Carbohydrate metabolism	Pentose phosphate pathway	41		337	Carbohydrate degradation
158957575	P41214	EIF2D	Eukaryotic translation initiation factor 2D	743	6	0.957322	0.950403	1.13152	0.792242	0.879328	0.819035	1.04343	1.08666	1.06321	EIF2D	0.846046	0.839932	1	0.700155	0.777119	0.723834	0.922147	0.960349	0.939627	1.01308	0.830202	1.06443	0.819481	0.0473157	-0.287218	1.32499	1.05069	0.444219	0.0713329	0.352403	1.28214	0.00121442	0.358551	2.91563	584	64.6655	7.6499					584
205371761	P23588	IF4B	Eukaryotic translation initiation factor 4B	744	97	0.906241	1.10026	1.21179	0.892132	0.785213	0.808707	1.01353	1.06796	1.10303	IF4B	0.747852	0.907962	1	0.736209	0.647976	0.667364	0.83639	0.881306	0.910249	1.07276	0.828684	1.06151	0.772475	0.0619944	-0.37244	1.20765	0.989507	0.909487	-0.0152184	0.0412037	1.28096	0.00500174	0.357222	2.30088	611	69.1103	5.73193	Tanslation regulation	RNA Transporter	113		611
476007832	Q86XX4	FRAS1	Extracellular matrix protein FRAS1	745	1	0.813593	0.83676	1.03849	0.992616	0.841459	0.928797	1.13542	1.22504	1.17832	FRAS1	0.664137	0.683048	0.84772	0.810274	0.686884	0.758178	0.926848	1	0.961862	0.896281	0.920957	1.17959	1.02753	0.783013	0.0391834	0.106231	1.3161	0.0203026	0.396266	1.69245	1.28083	0.00706588	0.357083	2.15083	4008	442.928	5.56689	ECM	glycoprotein	23		4008
212276474	P50452	SPB8	Serpin B8	746	16	0.762234	0.817745	1.01862	0.981865	0.908624	0.853263	1.21793	1.10046	1.19404	SPB8	0.625845	0.671423	0.836359	0.806177	0.746041	0.700586	1	0.903554	0.98039	0.866201	0.914584	1.17081	1.05586	0.605064	0.0784138	0.218199	1.35166	0.0237324	0.434735	1.62466	1.28016	0.00772247	0.356321	2.11224	374	42.7392	5.56689					374
50401600	Q8N0X7	SPG20	Spartin	747	29	0.905113	0.956548	1.17496	0.886361	0.822095	0.865249	1.06785	1.07816	1.14704	SPG20	0.770338	0.814114	1	0.754378	0.699682	0.73641	0.908845	0.91762	0.976237	1.01221	0.857902	1.09768	0.847557	0.143128	-0.238618	0.844276	1.08445	0.378368	0.11696	0.422085	1.2795	0.00154768	0.355578	2.81032	666	72.7878	5.90967					666
417216	P33176	KINH	Kinesin-1 heavy chain	748	145	0.848313	0.924062	1.10526	0.916094	0.834533	0.864425	1.10898	1.10244	1.13441	KINH	0.747799	0.814572	0.9743	0.807548	0.735652	0.762002	0.977582	0.971819	1	0.959211	0.871684	1.11528	0.908751	0.33465	-0.138043	0.475409	1.16271	0.112103	0.217485	0.950384	1.27945	0.000695533	0.355529	3.15768	963	109.617	6.50732					963
52000804	Q6VY07	PACS1	Phosphofurin acidic cluster sorting protein 1	749	10	0.908293	1.00633	1.06841	0.967822	0.879665	0.885056	1.23731	1.14393	1.11432	PACS1	0.734087	0.81332	0.863491	0.782198	0.71095	0.715307	1	0.924533	0.900596	0.994343	0.910848	1.16519	0.91603	0.201251	-0.126533	0.696261	1.17182	0.0455108	0.228746	1.34189	1.27923	0.00555025	0.35528	2.25569	963	104.833	7.73779					963
160332306	Q99759	M3K3	Mitogen-activated protein kinase kinase kinase 3	750	4	0.946217	1.08812	0.985057	0.93427	0.891973	0.972572	1.28614	1.16303	1.13098	M3K3	0.7357	0.846032	0.765899	0.726411	0.693524	0.756192	1	0.904276	0.879356	1.00646	0.932938	1.19338	0.926946	0.202713	-0.109443	0.693119	1.18572	0.042192	0.245762	1.37477	1.27917	0.00781145	0.355205	2.10727	626	70.8534	8.83643	MAPK	MAPKKK	3516		626
54035909	Q9NTM9	CUTC	Copper homeostasis protein cutC homolog	751	1	0.764313	0.887388	1.21304	0.790657	0.823503	0.756634	0.927487	1.02439	1.0793	CUTC	0.630082	0.731543	1	0.6518	0.678877	0.623752	0.764599	0.844485	0.889751	0.954913	0.790265	1.01039	0.827578	0.290366	-0.273033	0.537055	1.0581	0.714095	0.0814753	0.146244	1.27855	0.0104304	0.354509	1.9817	273	29.322	8.17725					273
156637424	Q68CZ2	TENS3	Tensin-3	752	37	0.954198	0.998631	0.978708	0.910944	0.902512	0.935533	1.24424	1.09415	1.17524	TENS3	0.76689	0.802601	0.786589	0.732127	0.72535	0.751889	1	0.87937	0.944543	0.977179	0.91633	1.17121	0.93773	0.0199384	-0.0927557	1.70031	1.19856	0.0127548	0.261307	1.89433	1.27816	0.00459681	0.354063	2.33754	1445	155.169	6.81494	Epithelial-mesenchymal transition (EMT)	Invadopodia Molecules	4076		1445
42560548	Q15365	PCBP1	Poly(rC)-binding protein 1	753	106	0.955478	1.056	1.32336	0.84824	0.829313	0.746979	0.967907	1.06001	1.07053	PCBP1	0.722008	0.797966	1	0.640974	0.626672	0.564456	0.731401	0.801	0.808948	1.11161	0.808177	1.03282	0.727032	0.0564198	-0.459909	1.24857	0.929116	0.529229	-0.10607	0.276356	1.27796	0.00755731	0.353839	2.12163	356	37.4739	7.09326	Transcriptional Regulation	Common component	10		356
56404535	Q6XZF7	DNMBP	Dynamin-binding protein	754	11	0.888803	1.12904	1.20504	0.934339	0.839594	0.886706	1.11156	1.17192	1.1161	DNMBP	0.737573	0.936935	1	0.775361	0.696737	0.735833	0.922428	0.972515	0.926197	1.07429	0.88688	1.13319	0.825546	0.131723	-0.276579	0.880337	1.05483	0.577474	0.0770048	0.238467	1.27773	0.00182975	0.353584	2.73761	1577	177.236	5.38916					1577
152112287	O94979	SC31A	Protein transport protein Sec31A	755	86	0.911428	0.941997	1.08521	0.91409	0.841753	0.856847	1.05908	1.11861	1.16009	SC31A	0.785656	0.812006	0.935456	0.78795	0.725595	0.738607	0.912934	0.964249	1	0.979545	0.870897	1.11259	0.889083	0.133917	-0.16961	0.873164	1.13583	0.0948543	0.183742	1.02294	1.27753	0.00274411	0.353352	2.5616	1220	132.931	6.88818	Folding, sorting and degradation	Protein processing in endoplasmic reticulum	33		1220
1346191	P48637	GSHB	Glutathione synthetase	756	45	0.773578	0.824404	0.943927	0.951191	0.891718	0.896497	1.22669	1.11058	1.16094	GSHB	0.630621	0.672054	0.769489	0.775411	0.726929	0.730824	1	0.905342	0.946398	0.847303	0.913135	1.16607	1.0777	0.28958	0.107951	0.538232	1.37621	0.00627543	0.460705	2.20236	1.277	0.00281921	0.352753	2.54987	474	52.3523	5.92236	AminoAcid metbolism	Glutathione metabolism	1768		474	Sulfur metabolism
119172	P13639	EF2	Elongation factor 2	757	385	0.924329	1.11516	1.46459	0.827515	0.744214	0.740159	0.937187	1.0124	1.00153	EF2	0.631117	0.761415	1	0.565014	0.508137	0.505369	0.639896	0.691254	0.683832	1.16803	0.77063	0.983709	0.65977	0.06876	-0.599966	1.16266	0.842196	0.31327	-0.247772	0.504082	1.2765	0.00446374	0.352194	2.3503	858	95.277	6.82959					858
74718831	Q9HC38	GLOD4	Glyoxalase domain-containing protein 4	758	19	0.783041	0.873303	1.08508	0.961336	0.870936	0.831407	1.14725	1.13255	1.11999	GLOD4	0.68254	0.761217	0.945815	0.837951	0.759154	0.724698	1	0.987193	0.976246	0.913809	0.887893	1.13326	0.97164	0.803377	-0.0415066	0.0950805	1.24015	0.0710374	0.31052	1.14851	1.27635	0.00333888	0.352027	2.4764	313	34.7713	5.60498					313
90110415	Q14181	DPOA2	DNA polymerase alpha subunit B	759	2	0.768178	1.10626	1.49678	0.710032	0.763248	0.686656	0.913675	0.891699	0.949721	DPOA2	0.513219	0.739094	1	0.474372	0.509925	0.458754	0.610425	0.595743	0.634508	1.12374	0.719979	0.918365	0.640698	0.129194	-0.642285	0.888758	0.817238	0.385882	-0.291171	0.413546	1.27554	0.00217395	0.351113	2.66275	598	65.9063	5.23682	DNA replication and Repair	DNA replication	13		598
34222503	O75223	GGCT	Gamma-glutamylcyclotransferase	760	7	0.769731	0.940897	1.13897	0.955896	0.863693	0.911605	1.2276	1.15019	1.1046	GGCT	0.627021	0.766453	0.927801	0.778671	0.703562	0.742592	1	0.936942	0.899809	0.949866	0.910398	1.1608	0.958449	0.737785	-0.0612258	0.13207	1.22207	0.134222	0.289321	0.872178	1.27504	0.00498419	0.350547	2.30241	188	20.9943	5.13525	AminoAcid metbolism	Glutathione metabolism	1764		188
46577655	P61081	UBC12	NEDD8-conjugating enzyme Ubc12	761	20	0.783708	0.912971	1.22611	0.952947	0.827256	0.874264	1.08878	1.14798	1.14725	UBC12	0.639181	0.744606	1	0.777209	0.674698	0.713037	0.887993	0.936274	0.935683	0.974264	0.884822	1.128	0.908196	0.547683	-0.138925	0.261471	1.1578	0.311392	0.211387	0.506692	1.27484	0.00426383	0.350312	2.3702	183	20.8866	7.69385	Folding, sorting and degradation	Ubiquitin mediated proteolysis	14		183	Protein modification
6647482	O14579	COPE	Coatomer subunit epsilon	762	48	0.930456	0.953065	1.07455	0.916656	0.833555	0.842252	1.01989	1.12701	1.15718	COPE	0.80407	0.823608	0.928591	0.792144	0.720331	0.727847	0.88136	0.973928	1	0.986024	0.864154	1.10136	0.876403	0.0788098	-0.190333	1.10342	1.11698	0.132242	0.159597	0.878631	1.2745	0.008576	0.34993	2.06672	308	34.4603	5.12256					308
2498464	Q13442	HAP28	28 kDa heat- and acid-stable phosphoprotein	763	28	0.936252	0.996125	1.17405	0.825564	0.741873	0.795114	0.929969	1.02704	1.05401	HAP28	0.797457	0.848455	1	0.703178	0.631894	0.677242	0.792106	0.874789	0.897759	1.03547	0.787517	1.00367	0.760537	0.0303571	-0.394909	1.51774	0.969289	0.713761	-0.0450007	0.146447	1.27448	0.00856524	0.349908	2.06726	181	20.6176	8.86572					181
74725271	Q9NQR4	NIT2	Omega-amidase NIT2	764	28	0.758185	0.793661	0.919798	0.942109	0.917303	0.93511	1.19879	1.15978	1.20252	NIT2	0.630497	0.659998	0.764892	0.783445	0.762817	0.777625	0.996895	0.964456	1	0.823881	0.931507	1.18703	1.13063	0.095787	0.17713	1.01869	1.44078	0.00204231	0.526846	2.68988	1.27431	7.99893e-05	0.349716	4.09697	276	30.5886	7.21045	AminoAcid metbolism	Alanine, aspartate and glutamate metabolism	1423		276
20532376	Q9Y4X5	ARI1	E3 ubiquitin-protein ligase ARIH1	765	7	0.901094	0.954262	1.07978	0.919663	0.867168	0.848323	1.19136	1.08175	1.0825	ARI1	0.756357	0.800986	0.906341	0.771944	0.727881	0.712063	1	0.907999	0.908623	0.978378	0.878385	1.11854	0.897796	0.154859	-0.15554	0.810063	1.14326	0.094699	0.193148	1.02365	1.2734	0.00471204	0.348688	2.32679	557	64.0758	5.08447	Ubiquitination	E3	5608		557	Protein modification
56757653	Q13029	PRDM2	PR domain zinc finger protein 2	766	2	0.977002	0.868543	1.03265	0.803124	0.776351	0.811056	1.04483	1.00978	0.989181	PRDM2	0.93508	0.831274	0.988344	0.768663	0.743039	0.776254	1	0.96645	0.946736	0.9594	0.796844	1.0146	0.830565	0.0300401	-0.267835	1.5223	1.05753	0.338744	0.0807038	0.470129	1.27327	0.000354665	0.348539	3.45018	1718	188.797	7.31299	Chromatin modification	K-methyltransferases(27)	27		1718
74733511	Q9H009	NACA2	Nascent polypeptide-associated complex subunit alpha-2	767	4	0.985707	1.11606	1.46416	0.800253	0.716446	0.786993	0.907371	1.02276	1.00303	NACA2	0.673224	0.762254	1	0.546562	0.489323	0.537505	0.619722	0.698528	0.685054	1.18864	0.767897	0.977718	0.646029	0.0441799	-0.630328	1.35478	0.822551	0.225125	-0.281823	0.647577	1.27324	0.00892935	0.348505	2.04918	215	23.2088	4.729					215
347595791	Q96TA1	NIBL1	Niban-like protein 1	768	86	0.91594	0.936602	1.05379	0.888009	0.862237	0.860573	1.09417	1.09553	1.13359	NIBL1	0.808001	0.826227	0.929605	0.783361	0.760626	0.759158	0.96523	0.96643	1	0.968777	0.870273	1.10777	0.898321	0.0879052	-0.154697	1.05599	1.14347	0.0361953	0.193416	1.44135	1.27289	0.000110657	0.348113	3.95602	746	84.0847	6.18896					746
60390214	Q9BW62	KATL1	Katanin p60 ATPase-containing subunit A-like 1	769	3	0.881286	0.921591	1.09811	0.952373	0.915474	0.937941	1.29335	1.12293	1.15511	KATL1	0.681399	0.712563	0.849042	0.736363	0.707832	0.725203	1	0.868234	0.893113	0.966995	0.935263	1.19046	0.967185	0.662493	-0.0481367	0.178819	1.23109	0.0575882	0.29994	1.23967	1.27286	0.00876271	0.348077	2.05736	490	55.3572	6.7417					490
12230426	O94903	PROSC	Proline synthase co-transcribed bacterial homolog protein	770	16	0.804122	0.866475	0.961263	0.915666	0.894036	0.904086	1.10788	1.14568	1.19787	PROSC	0.671295	0.723348	0.802479	0.764414	0.746357	0.754746	0.924874	0.956432	1	0.877287	0.904596	1.15047	1.03113	0.585522	0.0442257	0.232456	1.3114	0.00654826	0.391108	2.18387	1.27181	0.000786766	0.346882	3.10415	275	30.3246	7.50342					275
1709543	P24666	PPAC	Low molecular weight phosphotyrosine protein phosphatase	771	18	0.776679	0.904843	1.13286	1.00407	0.915008	0.922332	1.19195	1.19362	1.22757	PPAC	0.632694	0.737098	0.922848	0.817927	0.745378	0.751345	0.970979	0.972337	1	0.938129	0.947135	1.20438	1.0096	0.937546	0.0137843	0.0280072	1.28381	0.0639504	0.360432	1.19416	1.2716	0.00112539	0.346648	2.9487	158	18.0308	6.7417	Cellular Communication	Adherens junction(73)	73		158
32699512	Q15370	ELOB	Transcription elongation factor B polypeptide 2	772	29	0.914848	0.89984	1.09224	0.926398	0.829761	0.865505	1.11697	1.13726	1.07816	ELOB	0.804434	0.791238	0.960414	0.814591	0.729617	0.761046	0.982162	1	0.948036	0.968975	0.873888	1.1108	0.901869	0.234097	-0.149011	0.630604	1.14636	0.0916157	0.197062	1.03803	1.2711	0.00201933	0.346072	2.69479	118	13.1246	4.88135	Folding, sorting and degradation	Ubiquitin mediated proteolysis	84		118	Protein modification
300669706	Q9BYX2	TBD2A	TBC1 domain family member 2A	773	13	0.88943	1.09737	1.482	0.857094	0.843866	0.856997	1.09711	1.06097	1.09217	TBD2A	0.600154	0.740466	1	0.578335	0.569409	0.57827	0.740289	0.715905	0.736955	1.15627	0.852652	1.08342	0.737417	0.155268	-0.439447	0.808918	0.936995	0.696863	-0.0938868	0.156852	1.27064	4.50571e-05	0.34556	4.34624	928	105.348	6.58057					928
296452981	Q8N392	RHG18	Rho GTPase-activating protein 18	774	18	0.87757	0.942556	1.20124	0.896766	0.848311	0.888817	1.12222	1.0908	1.13368	RHG18	0.730556	0.784655	1	0.746536	0.706198	0.739919	0.934224	0.908063	0.943759	1.00712	0.877965	1.11557	0.871757	0.266031	-0.198002	0.575068	1.10768	0.337793	0.14754	0.471349	1.27063	0.000272799	0.345541	3.56416	663	74.9299	6.44287					663
269849475	P49815	TSC2	Tuberin	775	9	0.937883	1.00019	1.01091	0.967013	0.840138	0.996436	1.20062	1.19836	1.16267	TSC2	0.781168	0.833065	0.841995	0.805431	0.699756	0.829937	1	0.998118	0.968396	0.982996	0.934529	1.18721	0.950695	0.412886	-0.0729454	0.384169	1.20775	0.00139318	0.272324	2.85599	1.27039	0.0069611	0.345269	2.15732	1807	200.481	7.31299	PI3K	regulator mTor	3330		1807
292495088	Q00796	DHSO	Sorbitol dehydrogenase	776	11	0.870827	0.961112	1.10317	0.965445	0.906351	0.971694	1.17252	1.20791	1.22709	DHSO	0.709666	0.783242	0.899007	0.786773	0.738615	0.791866	0.955526	0.984367	1	0.978369	0.94783	1.20251	0.968786	0.688269	-0.0457501	0.162242	1.2291	0.0321078	0.297597	1.49339	1.2687	0.000631439	0.343347	3.19967	357	38.2998	7.97217	Carbohydrate metabolism	Pentose and glucuronate interconversions	89		357
313104266	Q96K76	UBP47	Ubiquitin carboxyl-terminal hydrolase 47	777	32	0.840899	0.931162	1.03958	0.928477	0.808655	0.890955	1.03756	1.16249	1.13328	UBP47	0.723363	0.80101	0.894276	0.7987	0.695626	0.766423	0.892532	1	0.974873	0.937215	0.876029	1.11111	0.934716	0.415711	-0.0974007	0.381209	1.18554	0.0646319	0.245544	1.18955	1.26834	0.0104605	0.342945	1.98045	1375	157.212	5.08447					1375
1706518	P55039	DRG2	Developmentally-regulated GTP-binding protein 2	778	15	0.821212	0.883589	1.1233	0.904586	0.846314	0.855781	1.08002	1.09335	1.13234	DRG2	0.725232	0.780318	0.992011	0.798861	0.7474	0.75576	0.953789	0.965566	1	0.942699	0.868894	1.1019	0.921708	0.475508	-0.117618	0.322842	1.16888	0.163499	0.22513	0.786484	1.26817	0.000622497	0.342748	3.20586	364	40.7204	8.88037					364
112690	P27348	1433T	14-3-3 protein theta	779	163	0.840396	0.966467	1.19248	0.926265	0.860452	0.849993	1.16128	1.10071	1.08004	1433T	0.704745	0.810466	1	0.776754	0.721563	0.712792	0.973837	0.923037	0.905705	0.999782	0.878903	1.11401	0.879095	0.31668	-0.185909	0.499379	1.11425	0.341216	0.156075	0.466971	1.2675	0.00232559	0.341984	2.63347	245	27.7468	4.77979	PI3K	inhibitor/FOXO	3297		245
116242778	Q6NW29	RWDD4	RWD domain-containing protein 4	780	4	0.93505	1.02035	1.17951	0.870422	0.849563	0.829781	1.09469	1.09734	1.03953	RWDD4	0.792742	0.865062	1	0.73795	0.720265	0.703494	0.928089	0.930335	0.881319	1.04497	0.849922	1.07719	0.813344	0.0548294	-0.298063	1.26099	1.03083	0.686058	0.0438058	0.163639	1.2674	0.000513209	0.341868	3.28971	188	21.2376	5.31299					188
46576651	Q9HB71	CYBP	Calcyclin-binding protein	781	29	1.03364	1.17744	1.57671	0.807664	0.769515	0.72955	0.940015	0.975683	1.00409	CYBP	0.655568	0.746768	1	0.512245	0.48805	0.462703	0.596187	0.618808	0.636827	1.2626	0.76891	0.973264	0.60899	0.0395448	-0.715509	1.40291	0.770842	0.151514	-0.375493	0.819548	1.26577	0.00219183	0.340016	2.65919	228	26.1936	8.25049					228
120649	P04406	G3P	Glyceraldehyde-3-phosphate dehydrogenase	782	1839	0.773237	0.819386	0.989798	0.957091	0.867668	0.895595	1.1152	1.13544	1.19261	G3P	0.648358	0.687055	0.829945	0.80252	0.727539	0.750956	0.935094	0.952063	1	0.860807	0.906784	1.14775	1.05341	0.552324	0.0750697	0.257806	1.33334	0.0147331	0.415044	1.83171	1.26573	0.00236813	0.339974	2.62559	335	36.0304	8.45557	Carbohydrate metabolism	Glycolysis / Gluconeogenesis	16		335	Carbohydrate degradation
5902703	P17174	AATC	Aspartate aminotransferase, cytoplasmic	783	27	0.804843	0.924342	1.0522	0.923075	0.887812	0.89308	1.18917	1.10987	1.12328	AATC	0.676813	0.777302	0.88482	0.776237	0.746584	0.751014	1	0.93332	0.944594	0.927128	0.901323	1.14077	0.972167	0.739043	-0.0407246	0.13133	1.23044	0.0473679	0.299172	1.32452	1.26567	0.000874332	0.339896	3.05832	413	46.2185	7.00537	AminoAcid metbolism	Alanine, aspartate and glutamate metabolism	1418		413
12231038	Q99471	PFD5	Prefoldin subunit 5	784	15	0.886736	0.982416	1.1494	0.871008	0.812549	0.85251	1.00603	1.09156	1.11035	PFD5	0.771476	0.854719	1	0.757793	0.706932	0.741698	0.875264	0.949678	0.966024	1.00618	0.845356	1.06931	0.84016	0.110382	-0.251264	0.9571	1.06274	0.490218	0.0877903	0.309611	1.26493	0.00355613	0.339055	2.44902	154	17.317	6.32861					154
135123	P12081	SYHC	Histidine--tRNA ligase, cytoplasmic	785	76	0.905118	1.02982	1.277	0.899915	0.826225	0.831961	1.01361	1.08788	1.13394	SYHC	0.708787	0.80644	1	0.704712	0.647006	0.651498	0.793742	0.851903	0.887971	1.07065	0.8527	1.07847	0.796436	0.12306	-0.32837	0.909884	1.00731	0.948894	0.0105092	0.0227823	1.26477	0.00593239	0.338879	2.22677	509	57.3742	5.88428	Tanslation regulation	Aminoacyl-tRNA biosynthesis	34		509
52082771	Q9BZL1	UBL5	Ubiquitin-like protein 5	786	6	0.916431	1.02987	1.44164	0.904778	0.902057	0.877276	1.14612	1.11254	1.13596	UBL5	0.635688	0.714377	1	0.627605	0.625718	0.608528	0.795016	0.771722	0.787966	1.12931	0.894704	1.13154	0.792255	0.215976	-0.335963	0.665595	1.00197	0.98954	0.00284552	0.00456645	1.26471	5.74656e-05	0.338809	4.24059	73	8.54143	8.44092					73
67461063	Q8WVJ2	NUDC2	NudC domain-containing protein 2	787	5	0.793285	0.950832	1.11882	0.918192	0.801955	0.87214	1.10694	1.09993	1.07053	NUDC2	0.709039	0.849855	1	0.820682	0.716789	0.77952	0.989388	0.983118	0.956845	0.954311	0.864096	1.09247	0.905466	0.417477	-0.143268	0.379367	1.14477	0.218148	0.195061	0.661249	1.26429	0.00303067	0.338329	2.51846	157	17.6647	5.07178					157
269849650	O15357	SHIP2	Phosphatidylinositol 3,4,5-trisphosphate 5-phosphatase 2	788	23	0.787314	0.895917	0.984455	0.966805	0.882248	0.878235	1.19607	1.10674	1.14353	SHIP2	0.658253	0.749052	0.823077	0.80832	0.737625	0.734269	1	0.925318	0.956075	0.889229	0.909096	1.14878	1.02234	0.771412	0.0318781	0.112713	1.29188	0.0143225	0.369475	1.84398	1.26365	0.00348957	0.337597	2.45723	1258	138.513	6.53662	Carbohydrate metabolism	Inositol phosphate metabolism	407		1258
8928247	Q15185	TEBP	Prostaglandin E synthase 3	789	25	0.892306	0.978518	1.30909	0.848878	0.782094	0.80472	0.973588	1.06962	1.03443	TEBP	0.681622	0.747478	1	0.648448	0.597432	0.614716	0.743712	0.81707	0.790187	1.05997	0.811897	1.02588	0.765961	0.125795	-0.384657	0.900336	0.967836	0.806196	-0.0471659	0.0935595	1.26356	0.00333698	0.337491	2.47665	160	18.6854	4.53857	lipid metabolism	Arachidonic acid metabolism	1033		160	Lipid metabolism
3024550	Q07960	RHG01	Rho GTPase-activating protein 1	790	48	0.772808	0.847933	0.986846	0.941262	0.912258	0.896016	1.18054	1.12456	1.16877	RHG01	0.654625	0.718261	0.83593	0.797317	0.772749	0.758991	1	0.952581	0.990029	0.869196	0.916512	1.15795	1.05444	0.501234	0.0764726	0.299959	1.33221	0.0112949	0.413823	1.94712	1.26343	0.000363061	0.33735	3.44002	439	50.4042	6.29053	Angiogenesis	RhoGAP	3639		439
94730596	Q6IBS0	TWF2	Twinfilin-2	791	30	0.898877	1.00163	1.12471	0.922439	0.783154	0.826394	1.02354	1.07844	1.09677	TWF2	0.799205	0.890561	1	0.820154	0.696314	0.734759	0.910041	0.958857	0.975154	1.00841	0.843996	1.06625	0.83696	0.100165	-0.256769	0.999283	1.05736	0.448364	0.0804672	0.348369	1.26333	0.00889182	0.337236	2.05101	349	39.5233	6.84424					349
296452920	Q9HA65	TBC17	TBC1 domain family member 17	792	5	0.876158	0.85151	0.932253	0.892288	0.876044	0.866384	1.08372	1.11053	1.12955	TBC17	0.775669	0.753848	0.82533	0.789949	0.775568	0.767017	0.95943	0.983158	1	0.88664	0.878239	1.10793	0.990524	0.75425	-0.0137358	0.122485	1.24959	0.0012661	0.321452	2.89753	1.26154	0.000114427	0.335188	3.94147	648	72.6825	5.18604					648
205371746	P53621	COPA	Coatomer subunit alpha	793	225	0.885576	0.938925	1.11139	0.925178	0.818668	0.868363	1.03254	1.12266	1.13908	COPA	0.777446	0.824281	0.975688	0.812212	0.718707	0.762335	0.906461	0.985584	1	0.978631	0.870736	1.09809	0.889749	0.222481	-0.168529	0.652707	1.12207	0.189985	0.166165	0.721281	1.26111	0.00733769	0.334694	2.13444	1224	138.258	7.66455					1224
17380569	Q13596	SNX1	Sorting nexin-1	794	34	0.813088	0.879673	0.988977	0.970149	0.872474	0.891639	1.19527	1.12282	1.12849	SNX1	0.680257	0.735964	0.827411	0.811659	0.729941	0.745975	1	0.93939	0.944129	0.893913	0.911421	1.14886	1.01959	0.782648	0.0279837	0.106434	1.2852	0.0105919	0.361995	1.97503	1.26051	0.00330192	0.334011	2.48123	522	59.0331	5.14795					522
118572639	P09417	DHPR	Dihydropteridine reductase	795	19	0.771836	0.809664	0.917118	0.924808	0.858039	0.85083	1.18719	1.04355	1.08901	DHPR	0.650135	0.681999	0.772511	0.778988	0.722746	0.716675	1	0.879005	0.917301	0.832873	0.877892	1.10658	1.05405	0.414357	0.0759482	0.382626	1.32863	0.0107753	0.409945	1.96757	1.2605	0.00919697	0.333996	2.03636	244	25.773	7.37158					244
77416852	P42574	CASP3	Caspase-3	796	8	0.76806	1.00967	1.10001	0.889032	0.879083	0.844815	1.0748	1.10666	1.11212	CASP3	0.690625	0.907879	0.98911	0.799401	0.790454	0.759642	0.966437	0.995091	1	0.959249	0.870977	1.09786	0.907978	0.427197	-0.139271	0.369372	1.1445	0.237071	0.194719	0.625121	1.26049	0.000215569	0.333989	3.66641	277	31.5875	6.53662	Apoptosis	Caspases	5		277
3024422	Q15126	PMVK	Phosphomevalonate kinase	797	10	0.834562	0.862618	1.1181	0.9671	0.877913	0.863352	1.10761	1.1059	1.19106	PMVK	0.700688	0.724244	0.93874	0.811966	0.737086	0.72486	0.929938	0.928499	1	0.938425	0.902789	1.13486	0.962025	0.72891	-0.0558533	0.137326	1.20932	0.106125	0.274197	0.97418	1.25706	0.00566291	0.33005	2.24696	192	21.9812	5.73193	cellProcess	Peroxisome	60		192	Isoprenoid biosynthesis
12643951	Q9Y3F4	STRAP	Serine-threonine kinase receptor-associated protein	798	43	0.93742	0.980793	1.17102	0.87073	0.79904	0.813553	0.961632	1.07291	1.08659	STRAP	0.800517	0.837555	1	0.743566	0.682346	0.694739	0.821192	0.916215	0.927898	1.02974	0.827774	1.04037	0.803864	0.054496	-0.314976	1.26364	1.01032	0.903025	0.014817	0.0443002	1.25683	0.00929596	0.329793	2.03171	350	38.414	5.12256	Tanslation regulation	RNA Transporter	79		350
48429227	P40763	STAT3	Signal transducer and activator of transcription 3	799	22	0.831139	0.943071	1.02439	0.949307	0.855427	0.861162	1.12566	1.10333	1.12093	STAT3	0.738357	0.837794	0.910033	0.843334	0.759934	0.765029	1	0.980162	0.995794	0.932866	0.888632	1.11664	0.952583	0.52582	-0.0700833	0.279163	1.197	0.0311783	0.25942	1.50615	1.25658	0.00184973	0.329503	2.73289	770	88.0114	6.30322	Cellular Communication	Signaling pathways regulating pluripotency of stem cells	7		770
25453325	Q9UBQ0	VPS29	Vacuolar protein sorting-associated protein 29	800	20	0.86559	0.862701	1.01587	0.952761	0.885952	0.900805	1.18777	1.07639	1.17816	VPS29	0.728752	0.72632	0.855275	0.802142	0.745895	0.7584	1	0.906229	0.991907	0.914721	0.913172	1.14744	0.998308	0.978694	-0.00244368	0.00935294	1.25442	0.0197525	0.327016	1.70438	1.25654	0.00463486	0.329459	2.33396	182	20.4927	6.78564					182
121948171	Q147X3	NAA30	N-alpha-acetyltransferase 30	801	4	0.933654	0.980404	1.18495	0.900086	0.873096	0.885565	1.05278	1.10342	1.18449	NAA30	0.787926	0.827379	1	0.759598	0.73682	0.747343	0.888462	0.931195	0.999611	1.033	0.886249	1.11357	0.857935	0.131414	-0.22106	0.881358	1.07799	0.402763	0.108342	0.39495	1.25649	0.00437412	0.329402	2.35911	362	39.2946	5.51611					362
68565856	O95989	NUDT3	Diphosphoinositol polyphosphate phosphohydrolase 1	802	7	0.809359	0.900961	1.05526	0.923806	0.889704	0.918633	1.22404	1.07152	1.13664	NUDT3	0.661218	0.736054	0.86211	0.754718	0.726858	0.750491	1	0.875392	0.928599	0.92186	0.910714	1.14407	0.98791	0.885315	-0.0175486	0.052902	1.24104	0.0577604	0.311553	1.23837	1.25623	0.00681434	0.329102	2.16658	172	19.4587	6.34131					172
51702266	P62993	GRB2	Growth factor receptor-bound protein 2	803	18	0.885393	0.946094	1.08134	0.915962	0.916261	0.868228	1.18945	1.06262	1.14016	GRB2	0.744373	0.795406	0.909107	0.770073	0.770324	0.729942	1	0.893375	0.958561	0.970941	0.90015	1.13074	0.927091	0.303937	-0.109218	0.517217	1.16459	0.080524	0.219816	1.09407	1.25617	0.00458192	0.329034	2.33895	217	25.1904	6.31592	Cellular Communication	Focal adhesion	190		217
47606055	Q9Y570	PPME1	Protein phosphatase methylesterase 1	804	17	0.831828	0.990431	1.15783	0.917853	0.863118	0.841317	1.12795	1.06159	1.10343	PPME1	0.71844	0.855424	1	0.792739	0.745464	0.726636	0.974194	0.916886	0.953017	0.993361	0.874096	1.09766	0.879938	0.285533	-0.184527	0.544344	1.10499	0.338796	0.144035	0.470062	1.25576	0.00170884	0.328562	2.7673	386	42.2882	5.97314					386
62286981	Q6PD74	AAGAB	Alpha- and gamma-adaptin-binding protein p34	805	2	0.927483	0.914834	1.17847	0.871599	0.985288	0.852134	1.08413	1.14682	1.17008	AAGAB	0.787024	0.77629	1	0.739603	0.836075	0.723086	0.919945	0.973147	0.992885	1.00693	0.903007	1.13368	0.896794	0.337075	-0.157152	0.472274	1.12588	0.230106	0.171049	0.638072	1.25545	0.00913591	0.328201	2.03925	315	34.5719	4.64014					315
1345590	P31946	1433B	14-3-3 protein beta/alpha	806	170	0.826635	0.871527	1.04473	0.939768	0.849342	0.892756	1.08885	1.15571	1.12174	1433B	0.715265	0.754108	0.903979	0.813155	0.734912	0.772477	0.942148	1	0.970614	0.914298	0.893955	1.1221	0.97775	0.789949	-0.0324627	0.102401	1.22728	0.0398919	0.295462	1.39912	1.25521	0.00216162	0.327925	2.66522	246	28.0648	4.83057	PI3K	inhibitor/FOXO	3293		246
1709744	P53041	PPP5	Serine/threonine-protein phosphatase 5	807	36	0.846953	0.930727	1.11682	0.89351	0.803557	0.847203	0.997903	1.09059	1.10433	PPP5	0.758359	0.833369	1	0.800046	0.719503	0.758583	0.893518	0.976508	0.988809	0.964834	0.84809	1.06427	0.879001	0.236345	-0.186063	0.626454	1.10306	0.314232	0.141513	0.502749	1.2549	0.00694569	0.327577	2.15828	499	56.8423	6.27783	MAPK	phosphatase	3563		499
74762196	Q5JSH3	WDR44	WD repeat-containing protein 44	808	27	0.806065	0.861456	1.01192	0.977593	0.866161	0.920371	1.14143	1.1605	1.16617	WDR44	0.69121	0.738708	0.867733	0.838296	0.742743	0.789228	0.978792	0.995139	1	0.893147	0.921375	1.15603	1.0316	0.705056	0.04489	0.151777	1.29434	0.0132301	0.372211	1.87844	1.25468	0.00207369	0.327321	2.68326	913	101.304	5.45264					913
[truncated: 5,642 more rows]
[truncated: 9 more columns]
