# Supplementary material for: Acid ceramidase promotes senescent cell survival
Source: Aging (Albany NY). 2021 Jun 8;13(12):15750–69. doi: 10.18632/aging.203170 (PMC8266329; doi:10.18632/aging.203170)
Supplement: Supplementary Table 2 [file aging-13-203170-s003.xls]

## Sheet: Replicative vs Proliferating
Supplementary Table 2. Metabolomics analysis of replicative exhaustion vs proliferating cells, IR-induced senescence vs proliferating cells, and ASAH1 siRNA vs Control siRNA.
Category	Metabolite Name	p-value	odds ratio
Ceramides	Cer(d16:1/20:0)	1	1
Ceramides	Cer(d16:1/22:0)	0.477388	0.350718
Ceramides	Cer(d16:1/24:0)	0.0594667	10.4016
Ceramides	Cer(d18:1/14:0)	0.339555	2.81409
Ceramides	Cer(d18:1/16:0)	0.742948	1.33325
Ceramides	Cer(d18:1/18:0)	0.890836	1.14104
Ceramides	Cer(d18:1/20:0(OH))	0.165403	6.55578
Ceramides	Cer(d18:1/20:0)	0.138873	0.171656
Ceramides	Cer(d18:1/22:0)	0.159642	4.10129
Ceramides	Cer(d18:1/23:0)	0.548721	1.95398
Ceramides	Cer(d18:1/24:0)	0.140808	3.91882
Ceramides	Cer(d18:1/24:1)	0.71446	1.39944
Ceramides	Cer(d18:1/25:0)	0.440082	2.96281
Ceramides	Cer(d18:1/26:0)	0.123729	6.4297
Ceramides	Cer(d18:1/26:1)	0.700003	1.50797
Ceramides	Cer(d18:2/14:0)	1	1
Ceramides	Cer(d18:2/16:0)	0.143044	3.85252
Ceramides	Cer(d18:2/18:0)	0.245009	3.19395
Ceramides	Cer(d18:2/22:0)	0.0330891	13.7773
Ceramides	Cer(d18:2/23:0)	0.0741496	25.9889
Ceramides	Cer(d18:2/24:0)	0.0902088	5.01966
Ceramides	Cer(d18:2/24:1)	0.0531264	9.70092
Fatty Acids	AA;Arachidonic acid	0.410553	2.886
Fatty Acids	DHA;Docosahexaenoid acid	0.25981	0.382672
Fatty Acids	EPA;Eicosapentaenoic acid	0.303237	2.64165
Sphingomyelins	SM (OH) C14:1	0.0566414	5.54013
Sphingomyelins	SM (OH) C16:1	0.0096754	14.6198
Sphingomyelins	SM (OH) C22:1	0.0272613	8.93919
Sphingomyelins	SM (OH) C22:2	0.0352052	7.81946
Sphingomyelins	SM (OH) C24:1	0.0160051	10.2341
Sphingomyelins	SM C16:0	0.0728787	4.83248
Sphingomyelins	SM C16:1	0.443922	1.87153
Sphingomyelins	SM C18:0	0.0251695	10.6183
Sphingomyelins	SM C18:1	0.0728787	4.83248
Sphingomyelins	SM C20:2	0.225573	3.32189
Sphingomyelins	SM C24:0	0.0099576	18.8305
Sphingomyelins	SM C24:1	0.0258281	7.95238
Sphingomyelins	SM C26:0	0.0562047	8.20919
Sphingomyelins	SM C26:1	0.0307606	7.95148

## Sheet: IR vs Proliferating
Category	Metabolite Name	p-value	odds ratio
Ceramides	Cer(d16:1/24:0)	0.793788	1.36159
Ceramides	Cer(d18:1/16:0)	0.174667	0.181233
Ceramides	Cer(d18:1/18:0)	0.06048	0.103252
Ceramides	Cer(d18:1/20:0(OH))	0.182993	5.90267
Ceramides	Cer(d18:1/20:0)	0.522918	2.90297
Ceramides	Cer(d18:1/22:0)	0.292283	0.271094
Ceramides	Cer(d18:1/24:0)	0.447722	0.46622
Ceramides	Cer(d18:1/24:1)	0.0383308	0.0999119
Ceramides	Cer(d18:1/26:0)	0.279495	5.9895
Ceramides	Cer(d18:1/26:1)	0.286442	7.38516
Ceramides	Cer(d18:2/16:0)	0.374614	0.422217
Ceramides	Cer(d18:2/18:0)	0.724584	2.05814
Ceramides	Cer(d18:2/22:0)	0.774172	1.45446
Ceramides	Cer(d18:2/24:0)	0.447258	2.19584
Ceramides	Cer(d18:2/24:1)	0.580236	2.02758
Fatty Acids	AA;Arachidonic acid	0.346943	3.23607
Fatty Acids	DHA;Docosahexaenoid acid	0.0626102	6.04952
Fatty Acids	EPA;Eicosapentaenoic acid	0.0524514	6.51808
Sphingomyelins	SM (OH) C14:1	1	1
Sphingomyelins	SM (OH) C16:1	0.133734	0.262872
Sphingomyelins	SM (OH) C22:1	0.542913	0.570643
Sphingomyelins	SM (OH) C22:2	0.379558	0.45434
Sphingomyelins	SM (OH) C24:1	0.399719	0.464455
Sphingomyelins	SM C16:0	0.0121863	0.0753985
Sphingomyelins	SM C16:1	0.0160051	0.0977124
Sphingomyelins	SM C18:0	0.404553	2.82746
Sphingomyelins	SM C18:1	0.538424	0.582508
Sphingomyelins	SM C20:2	0.217606	3.98716
Sphingomyelins	SM C24:0	0.552621	1.93026
Sphingomyelins	SM C24:1	0.673251	0.712402
Sphingomyelins	SM C26:0	0.729337	0.69693
Sphingomyelins	SM C26:1	0.434481	2.2442

## Sheet: ASAH1 vs Control siRNA
Category	Metabolite Name	p-value	odds ratio
Ceramides	Cer(d18:1/20:0(OH))	0.149523	0.0969479
Ceramides	Cer(d18:1/24:1)	0.687551	1.77069
Ceramides	Cer(d18:2/16:0)	1	1
Fatty Acids	AA;Arachidonic acid	0.401591	0.420447
Fatty Acids	DHA;Docosahexaenoid acid	0.387847	0.439715
Fatty Acids	EPA;Eicosapentaenoic acid	0.249148	0.318549
Fatty Acids	FA(18:2);Octadecadienoic acid	0.0748439	0.085389
Fatty Acids	FA(20:3);Eicosatrienoic acid	0.13235	0.0837623
Sphingomyelins	SM (OH) C16:1	0.878925	0.85991
Sphingomyelins	SM (OH) C22:1	0.803833	0.689729
Sphingomyelins	SM (OH) C22:2	0.230555	0.138071
Sphingomyelins	SM (OH) C24:1	0.163156	0.250728
Sphingomyelins	SM C16:0	0.015223	0.0471217
Sphingomyelins	SM C16:1	0.0300279	0.0896281
Sphingomyelins	SM C18:1	0.301729	0.327718
Sphingomyelins	SM C20:2	0.204522	0.202347
Sphingomyelins	SM C24:1	0.654139	1.54924
Sphingomyelins	SM C26:0	0.38135	2.58868
Sphingomyelins	SM C26:1	0.455463	0.240253
